# Supplementary material for: Genomes of multicellular algal sisters to land plants illuminate signaling network evolution
Source: PubMed Central journal article supplement (PMC11096116; doi:10.1038/s41588-024-01737-3), 2024-05-01
Supplement: 41588_2024_1737_MOESM5_ESM.pdf [file 41588_2024_1737_MOESM5_ESM.pdf]

Data S1-1

CsIC

Zci\_01359

Xyloglucan

GT2

Tree scale: 1

CsIK

CsIL

Zci\_04551  
Zci\_07893

<https://itol.embl.de/tree/979822487247861669516257>

Zci\_08939

CsIN

CsIA (plants)  
Mannan

bacteria bgsA  
MLG

CsIP

Zci\_01910  
Zci\_11882

Zci\_04468

CesA  
(rosette)

GT2

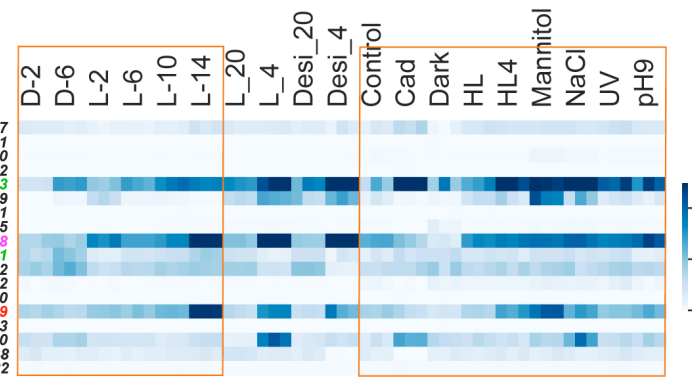

Zci\_03055

CesA

Zci\_07462  
Zci\_15850

CsIO

Zci\_13680

CsIQ

CsID

CsIB/E/G

**Data S1-2**

**GH9: cellulase**

Zci\_03863  
Zci\_03857  
Zci\_03866  
Zci\_01575  
(subclass C)

(Urbanowicz et al., 2007)

GH9B14 (At4g09740)  
GH9B15 (At4g23560)  
GH916 (At4g38990)  
GH9B17 (At4g39000)  
GH9B18 (At4g39010)  
GH9B6 (At1g23210)  
GH9B1 (At1g70710)  
GH9B2 (At1g02800)  
GH9B13 (At1g02290)  
GH9B4 (At1g22880)  
GH9B3 (At1g71380)  
GH9 (At3g43860)

**subclass B**

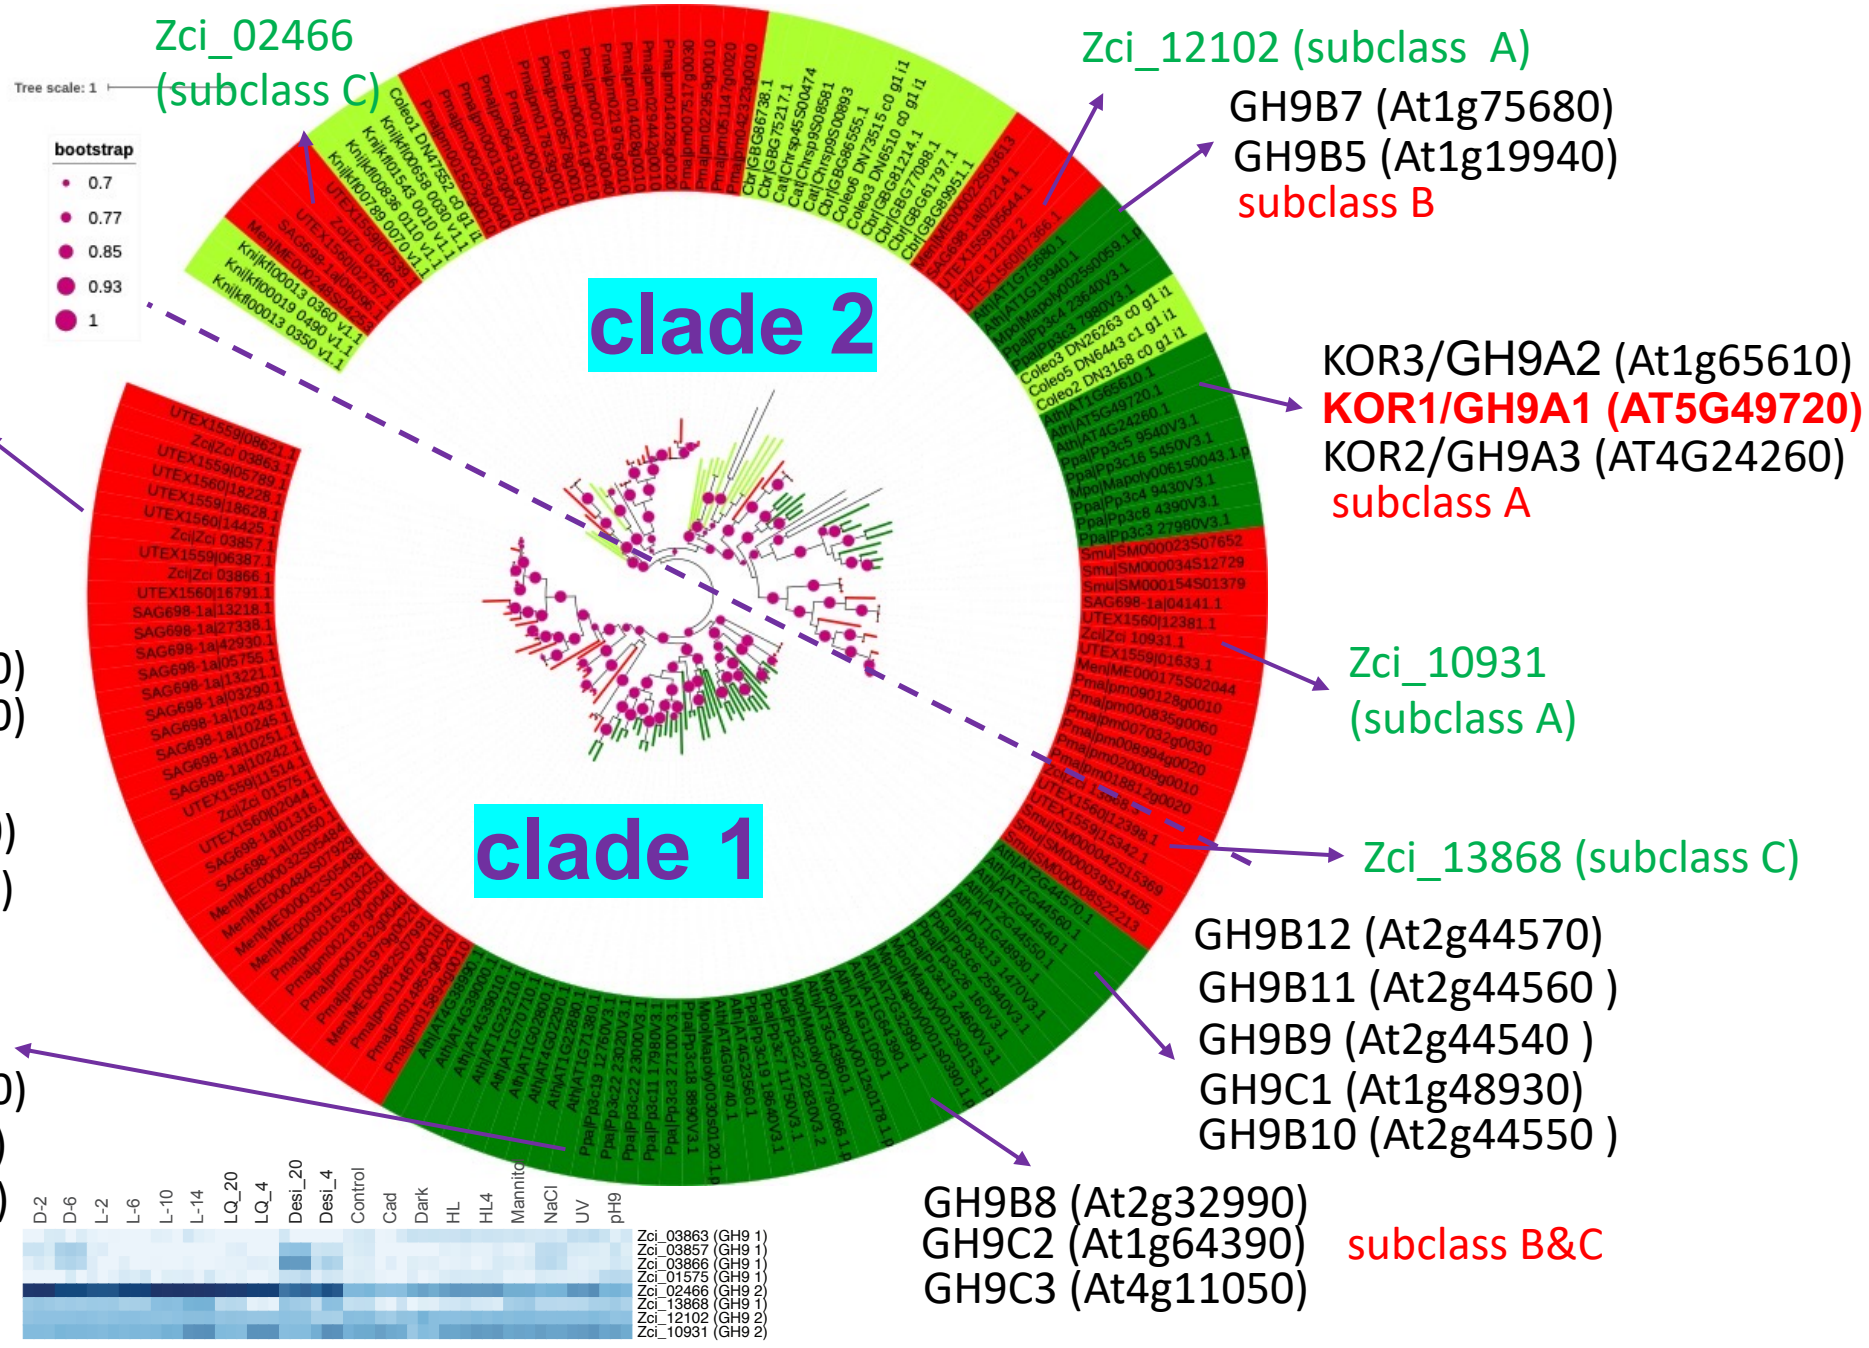

# Mannan

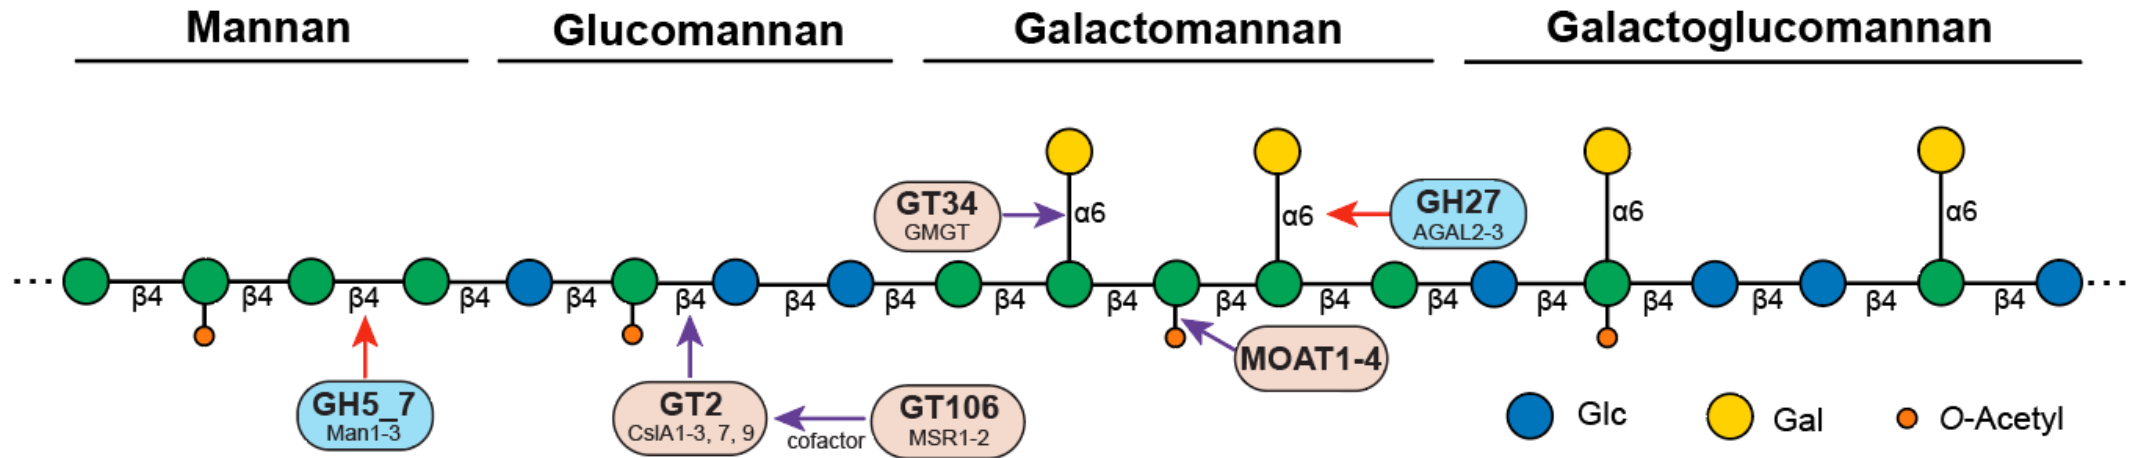



## Data S1-4

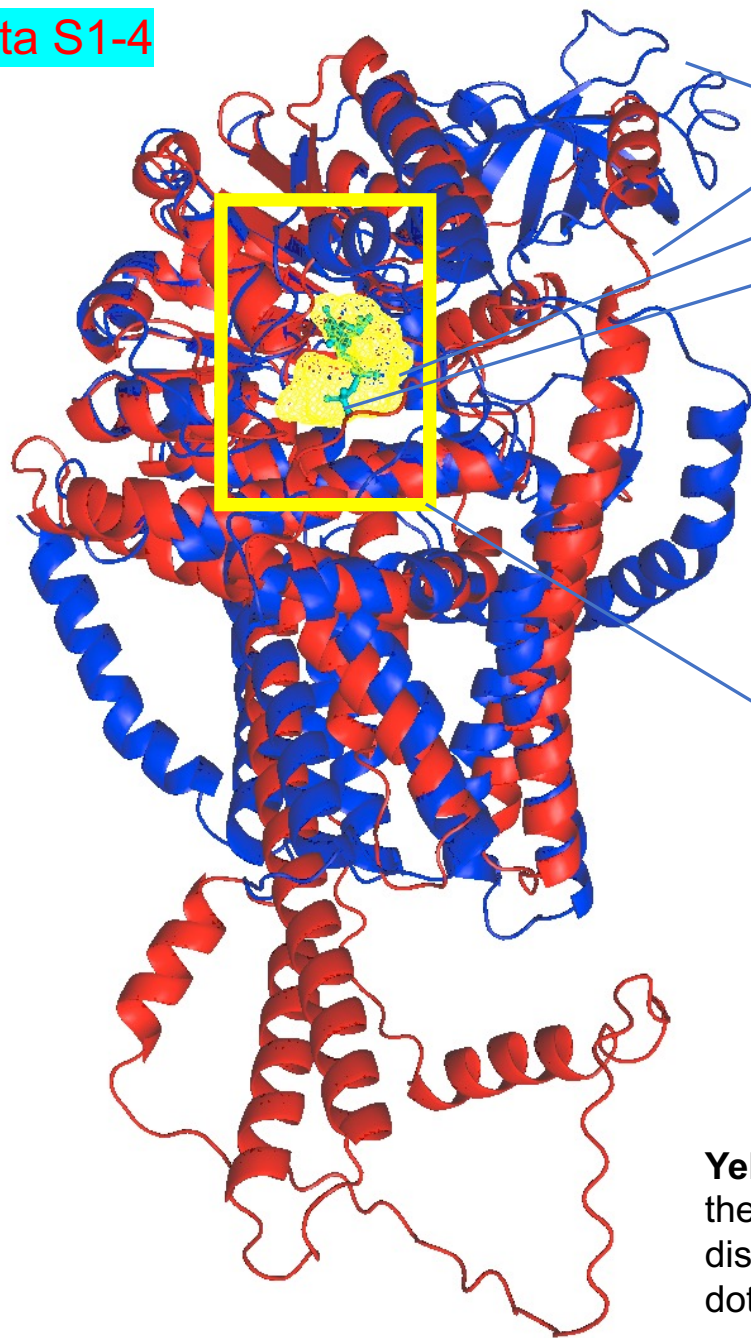

Superimposed 3D structures with ligands

**blue:** 4HG6 (bcsA, solved PDB structure, PubMed: 23222542)

**red:** Zci\_07893 (predicted ZcCsIL1 3D structure from AlphaFold)

**yellow mesh:** GDP-mannose docked into ZcCsIL1 structure

**cyan sticks:** UDP-glucose in bcsA structure

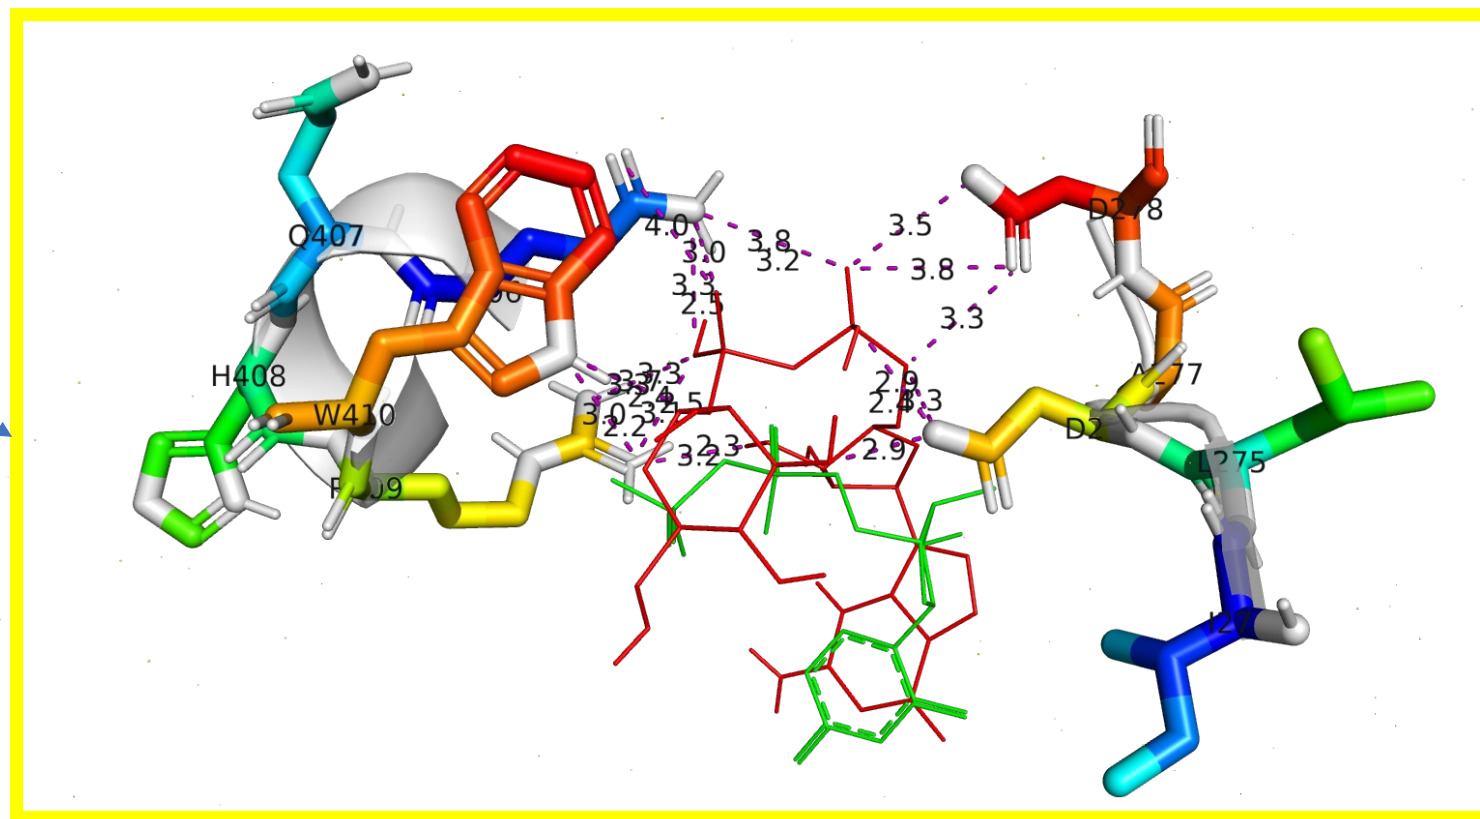

**Yellow** rectangle zoomed-in view of the binding sites of GDP-mannose (red lines) in ZcCsIL1: sticks on the left are the QQHRW motif (406-410), on the right are the ILDADD motif (274-278). The RMSD distances between the closest atoms in GDP-mannose and in the two motifs are show indicated with dotted lines. The superimposed binding motifs of UDP-glucose (green lines) in 4HG6 are also shown as cartoon view: on the left are the QRGRW motif (379-383), on the right are the VFDAD motif (244-248).

Data S1-5

e-value: e-5

Tree scale: 1

# O-FUT PF10250

GT68

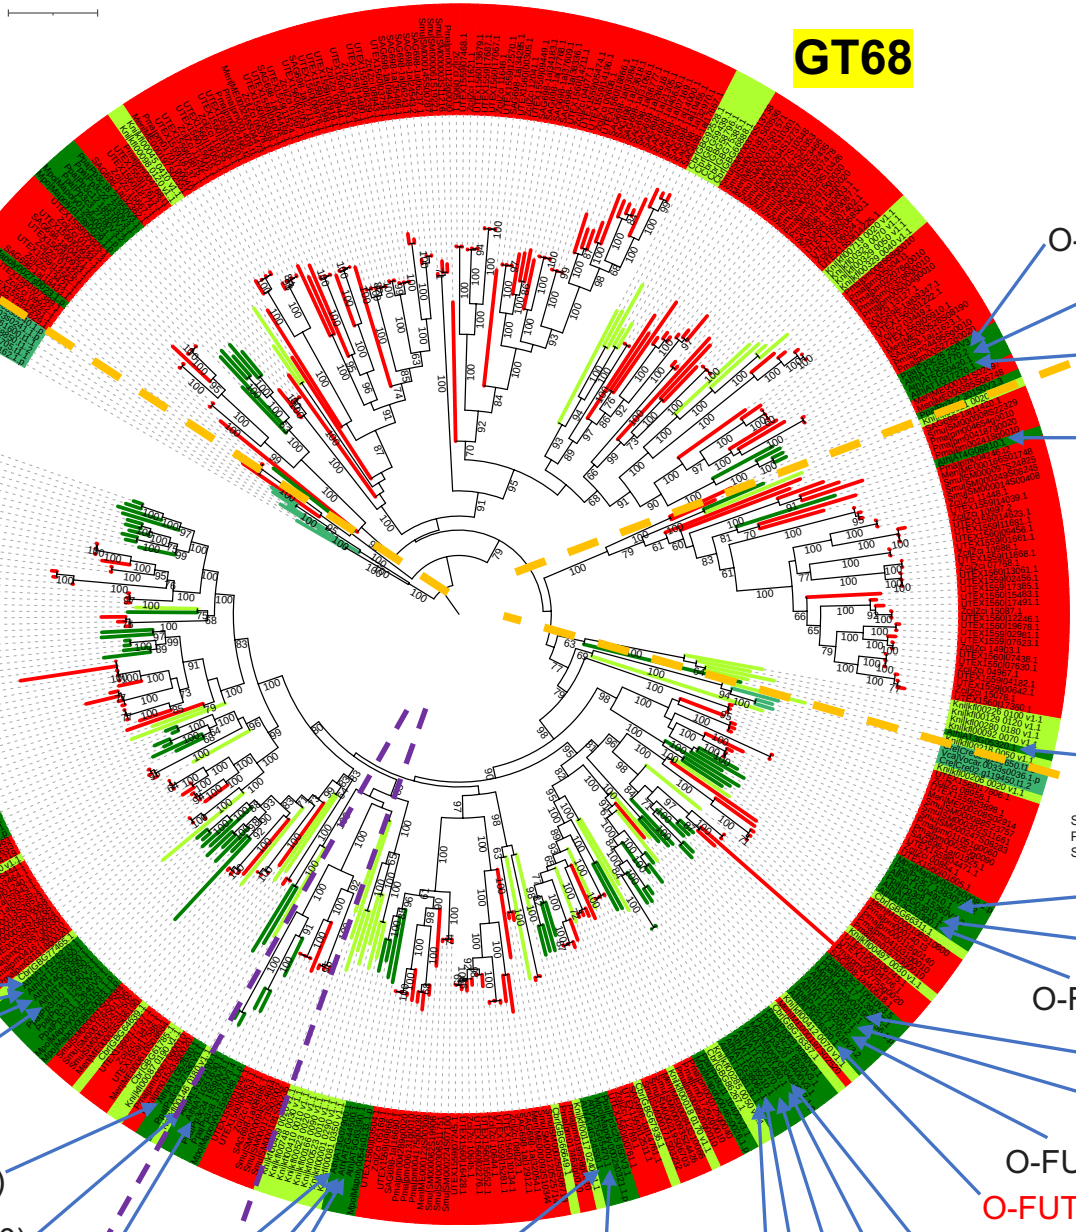

O-FUT19 **RRT9** (AT2G37980)

O-FUT28 **RRT10** (AT3G54100)

O-FUT33 **RRT8** (AT5G01100)

**Pectin** O-FUT35 **RRT7** (AT5G35570)

Neumetzler L, Humphrey T, Lumba S, et al. The FRIABLE1 gene product affects cell adhesion in Arabidopsis. *PLoS One*. 2012;7(8):e42914. doi:10.1371/journal.pone.0042914

O-FUT38 **RRT5** (AT5G64600)

O-FUT7 **RRT6** (AT1G22460)

**α-1,2-rhamnosyltransferases**

O-FUT21 **RRT2** (AT3G02250)

**RRTs** O-FUT34 **RRT1** (AT5G15740)

O-FUT18 **RRT3** (AT2G03280)

O-FUT3 **RRT4** (AT1G14020)

Takenaka Y, Kato K, Ogawa-Ohnishi M, Tsuruhama K, Kajijura H, Yagyu K, Takeda A, Takeda Y, Kunieda T, Hara-Nishimura I, Kuroha T, Nishitani K, Matsubayashi Y, Ishimizu T. Pectin **RG-I rhamnosyltransferases** represent a novel plant-specific glycosyltransferase family. *Nat Plants*. 2018 Sep;4(9):669-676. doi: 10.1038/s41477-018-0217-7.

**MSR1-2**

O-FUT16 (AT1G76270)

O-FUT6 (AT1G20550)

O-FUT32 (AT4G38390)

O-FUT29 (AT4G16650)

O-FUT13 (AT1G52630)

O-FUT25 **MSR1** (AT3G21190)

O-FUT12 **MSR2** (AT1G51630)

Wang Y, Mortimer JC, Davis J, Dupree P, Keegstra K. Identification of an additional protein involved in mannan biosynthesis. *Plant J*. 2013 Jan;73(1):105-17. doi: 10.1111/tpj.12019.

**mannan biosynthesis**

O-FUT24 (AT3G07900)

O-FUT20 (AT2G44500) O-FUT37 (AT5G63390)

O-FUT31 (AT4G24530)

O-FUT39 (AT5G65470)

O-FUT4 (AT1G14970)

O-FUT9 (AT1G35510)

O-FUT10 (AT1G38065)

O-FUT11 (AT1G38131)

O-FUT14 (AT1G53770)

O-FUT36 (AT5G50420)

O-FUT5 (AT1G17270)

SUB1 (AT4G08810)

Guo H, Mockler T, Duong H, Lin C. (2001). **SUB1**, an Arabidopsis Ca<sup>2+</sup>-binding protein involved in cryptochrome and phytochrome coaction. *Science*. 291(5503):487-90. doi: 10.1126/science.291.5503.487.

GT65

O-FUT23 (AT3G05320)

Smith DK, Jones DM, Lao JBR, Cruz ER, Brown E, Harper JF, Wallace IS. A Putative Protein O-Fucosyltransferase Facilitates Pollen Tube Penetration through the Stigma-Style Interface. *Plant Physiol*. 2018 Apr;176(4):2804-2818. doi: 10.1104/pp.17.01577.

O-FUT1 (AT1G04910)

O-FUT22 (AT3G03810)

O-FUT27 (AT3G30300)

O-FUT15 (AT1G62330)

O-FUT2 (AT1G11990)

GT106

O-FUT8 (AT1G29200)

O-FUT26 (AT3G26370)

O-FUT17 (AT2G01480)

**PAGR**

Stonebloom S, Ebert B, Xiong G, Pattathil S, Birdseye D, Lao J, Pauly M, Hahn MG, Heazlewood JL, Scheller HV. A DUF-246 family glycosyltransferase-like gene affects male fertility and the biosynthesis of pectic arabinogalactans. *BMC Plant Biol*. 2016 Apr 18;16:90. doi: 10.1186/s12870-016-0780-x.

**EMSD**

**altered pectin-related signaling**

verger S, Chabout S, Gineau E, Mouille G. Cell adhesion in plants is under the control of putative O-fucosyltransferases. *Development*. 2016 Jul 15;143(14):2536-40. doi: 10.1242/dev.132308.

# GT34

Tree scale: 1

## Xyloglucan

- XXT5 (AT1G74380)
- XXT4 (AT1G18690)
- XXT3 (AT5G07720)
- XXT2 (AT4G02500)
- XXT1 (AT3G62720)

Faik A, Price NJ, Raikhel NV, Keegstra K. An Arabidopsis gene encoding an alpha-xylosyltransferase involved in xyloglucan biosynthesis. Proc Natl Acad Sci U S A. 2002 May 28;99(11):7797-802. doi: 10.1073/pnas.102644799.

Cavaler DM, Keegstra K. Two xyloglucan xylosyltransferases catalyze the addition of multiple xylosyl residues to celohexaose. J Biol Chem. 2006 Nov 10;281(45):34197-207. doi: 10.1074/jbc.M606379200.

Vuttipongchaikij S, Brocklehurst D, Steele-King C, Ashford DA, Gomez LD, McQueen-Mason SJ. Arabidopsis GT34 family contains five xyloglucan  $\alpha$ -1,6-xylosyltransferases. New Phytol. 2012 Aug;195(3):585-595. doi: 10.1111/j.1469-8137.2012.04196.x.

Coleochaete scutate

## Mannan

galactomannan  $\alpha$ -1,6-galactosyltransferase activity

Voiniciu C, Schmidt MH, Berger A, Yang B, Ebert B, Scheller HV, North HM, Usadel B, Günl M. MUCILAGE-RELATED10 Produces Galactoglucomannan That Maintains Pectin and Cellulose Architecture in Arabidopsis Seed Mucilage. Plant Physiol. 2015 Sep;169(1):403-20. doi: 10.1104/pp.15.00851.

MUCI10/GMGT (AT2G22900)

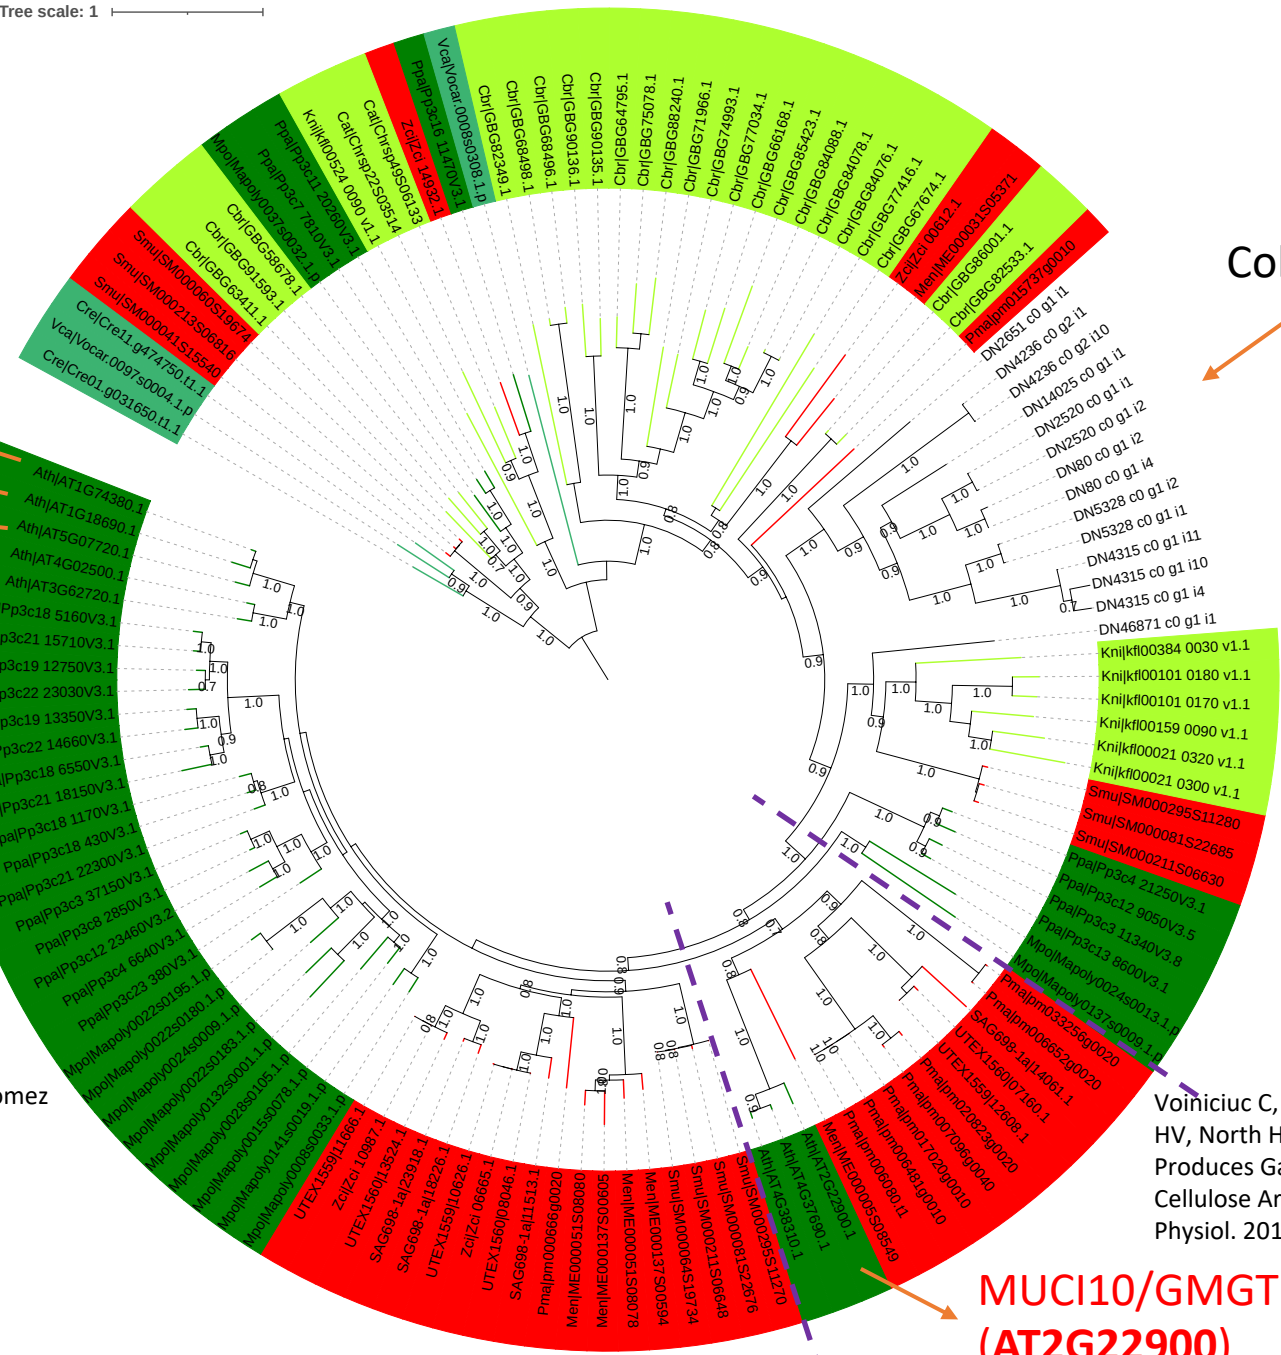

Data S1-7

Tree scale: 1

Clade I

DUF231  
O-acetyltransferase

Xylan

Clade VIII

XOAT3/TBL30 (AT3G11030)

XOAT7/TBL33 (AT2G40320)

XOAT8/TBL34 (AT2G38320)

XOAT9/TBL35 (AT5G01620)

XOAT4/TBL3 (AT5G01360)

XOAT5/TBL31 (AT1G73140)

XOAT2/TBL28 (AT2G40150)

ESK1/XOAT1/TBL29 (AT3G55990)

XOAT3/TBL30 (AT2G40160)

Clade IX

TBL38 (AT1G29050)

TBL37 (AT2G34070)

TBL39 (AT2G42570)

TBL40 (AT2G31110)

TBL41 (AT3G14850)

TBL42 (AT1G78710)

TBL43 (AT2G30900)

TBL45 (AT2G30010)

PMR5/TBL44 (AT5G58600)

TBL36 (AT3G54260)

Clade X

TBL5 (AT5G20590)

TBL6 (AT3G62390)

Clade VI

TBL1 (AT3G12060)

TBR (AT5G06700)

HG (pectin)

Clade V

TBL7 (AT1G48880)

TBL2 (AT1G60790)

TBL4 (AT5G49340)

TBL11 (AT5G19160)

TBL10 (AT3G06080)

TBL8 (AT3G11570)

TBL15 (AT2G37720)

Clade IV

TBL16 (AT5G20680)

TBL14 (AT5G64020)

TBL12 (AT5G64470)

TBL13 (AT2G14530)

Clade III

AXY4/TBL27 (AT1G70230)

XyG

TBL20 (AT3G02440)

TBL19 (AT5G15900)

AXY4/TBL22 (AT3G28150)

MOAT2/TBL24 (AT4G23790)

MOAT1/TBL23 (AT4G11090)

MOAT3/TBL25 (AT1G01430)

MOAT4/TBL26 (AT4G01080)

Mannan

TBL18 (AT4G25360)

YLS7/TBL17 (AT5G51640)

Clade II

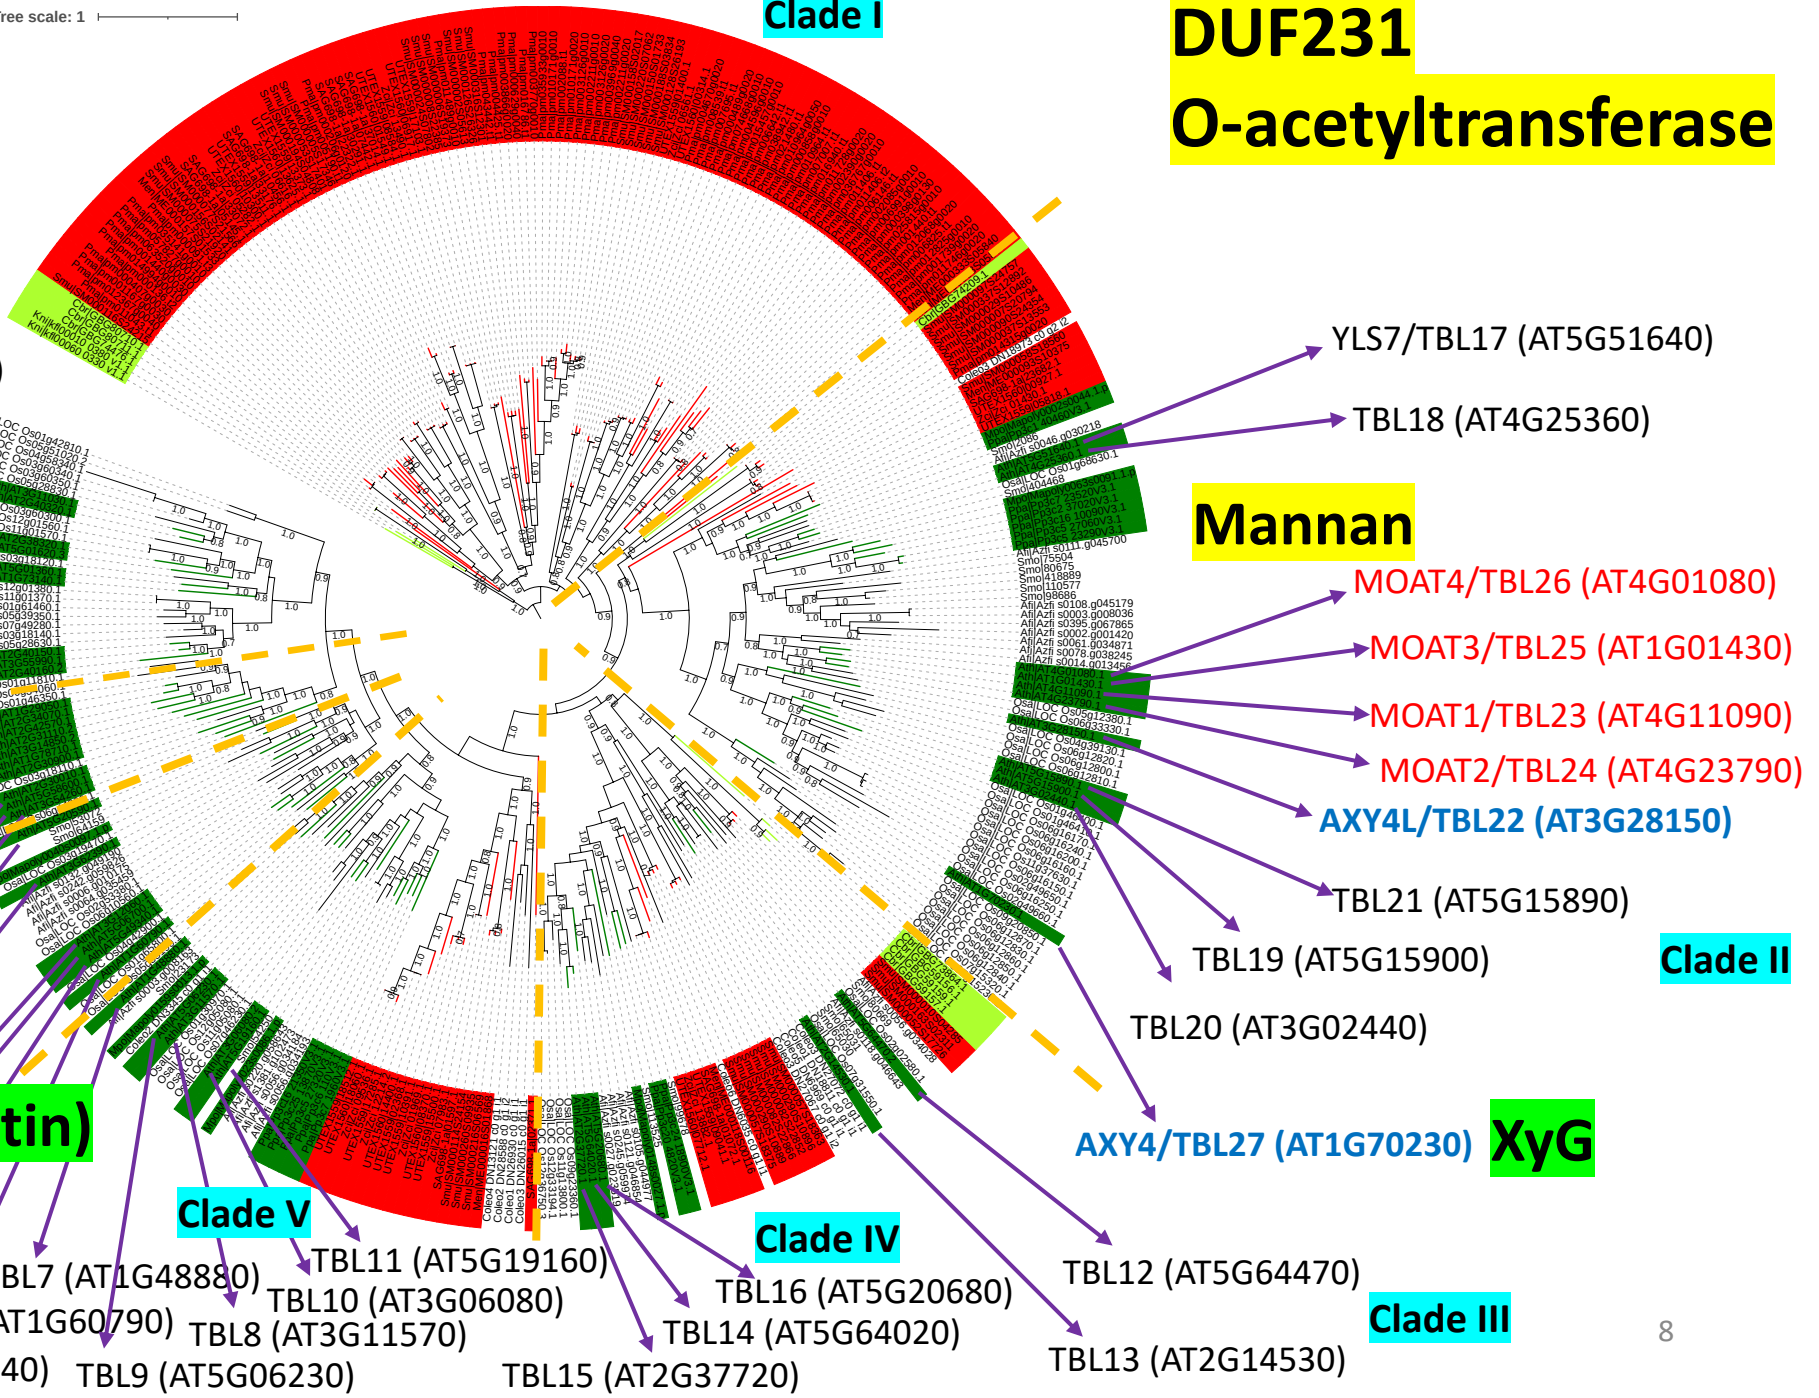



# GH5\_7

endo-β-1,4-mannanase (EC 3.2.1.78)

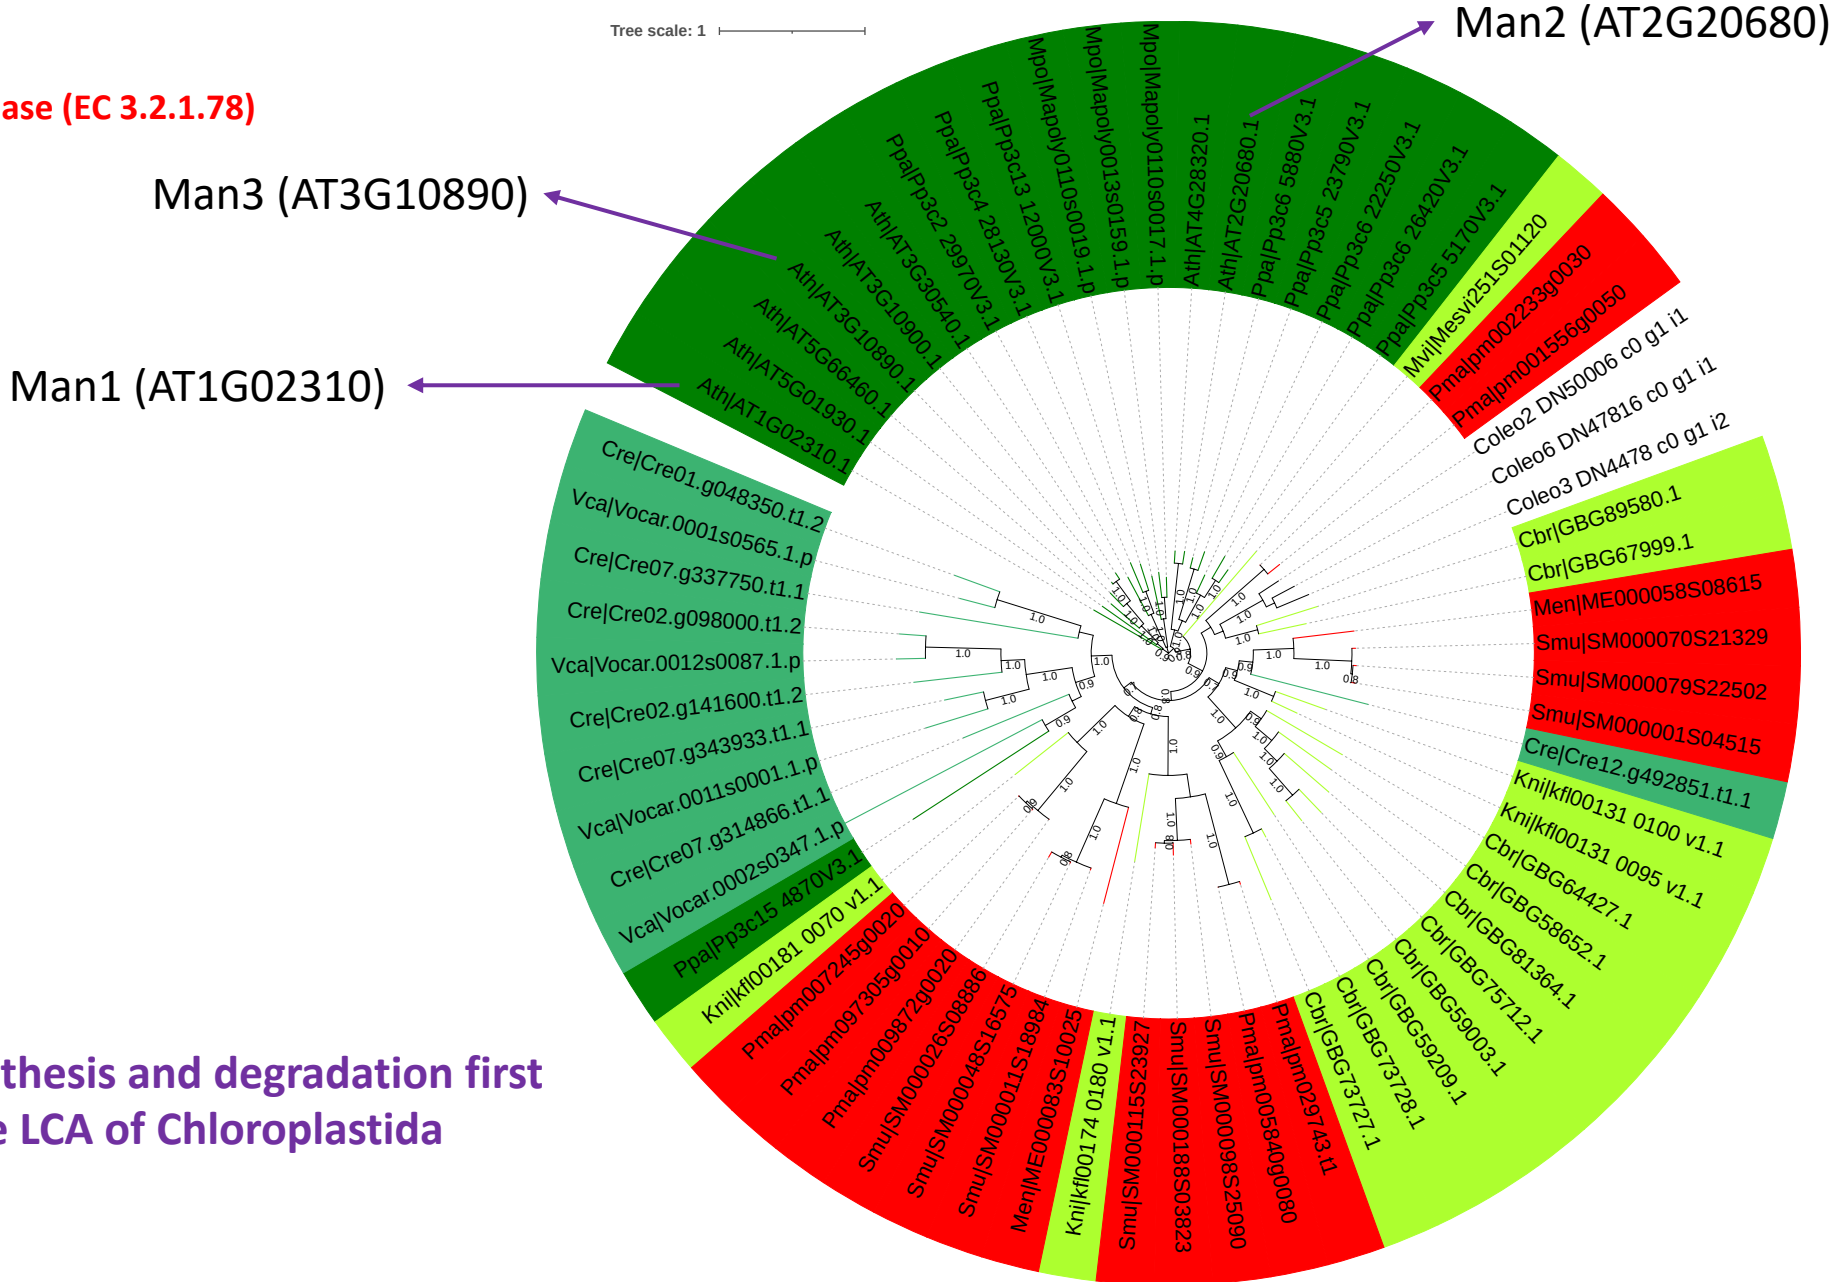

Mannan biosynthesis and degradation first appeared in the LCA of Chloroplastida

**GH5\_7 (nr)**

Tree scale: 1

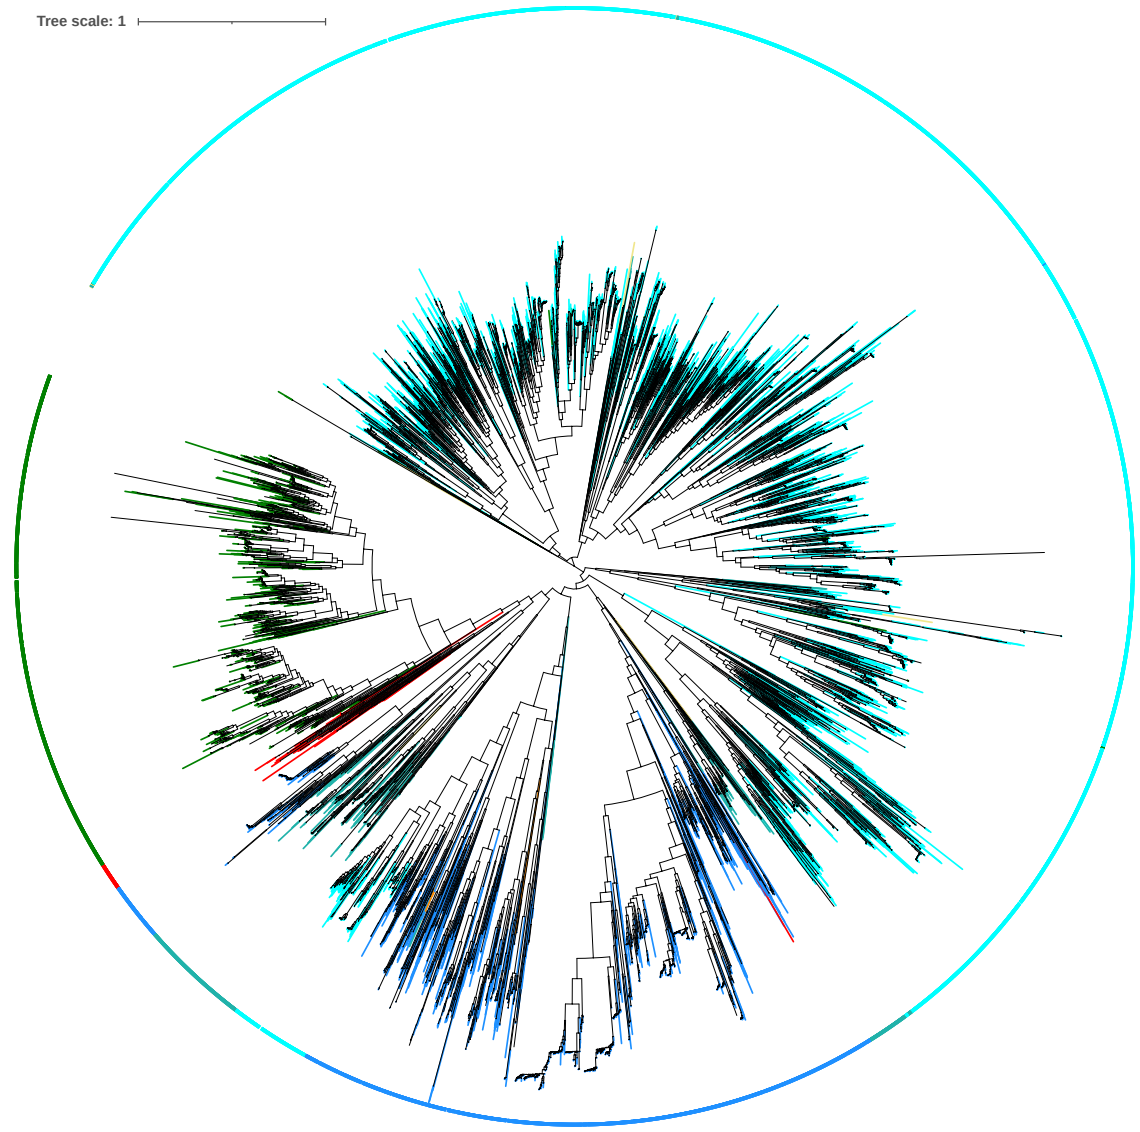

**Possible HGT from bacteria**

<https://itol.embl.de/tree/134238164171357031667587420>

# GH27 nr

Imaizumi et al. Heterologous expression and characterization of an Arabidopsis  $\beta$ -l-arabinopyranosidase and  $\alpha$ -d-galactosidases acting on  $\beta$ -l-arabinopyranosyl residues. J Exp Bot. 2017 Jul 20;68(16):4651-4661. doi: 10.1093/jxb/erx279.

AGAL1 (AT5G08380)  
 AGAL2 (AT5G08370) ←  
 AGAL3 (AT3G56310)

might have been gained via HGT between fungi and Klebsormidium

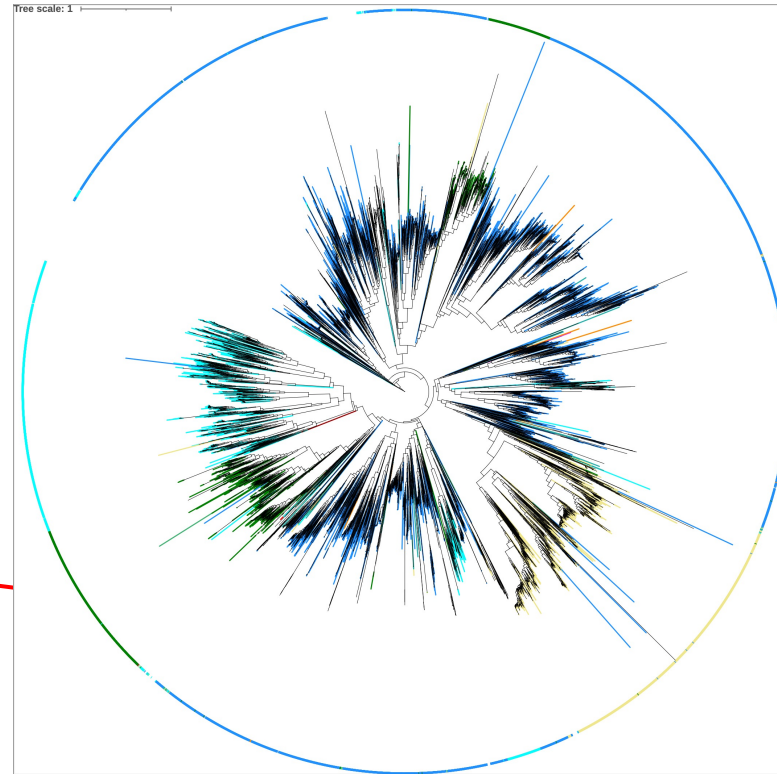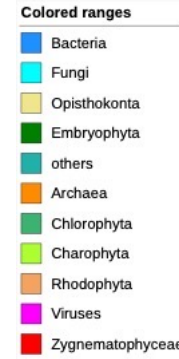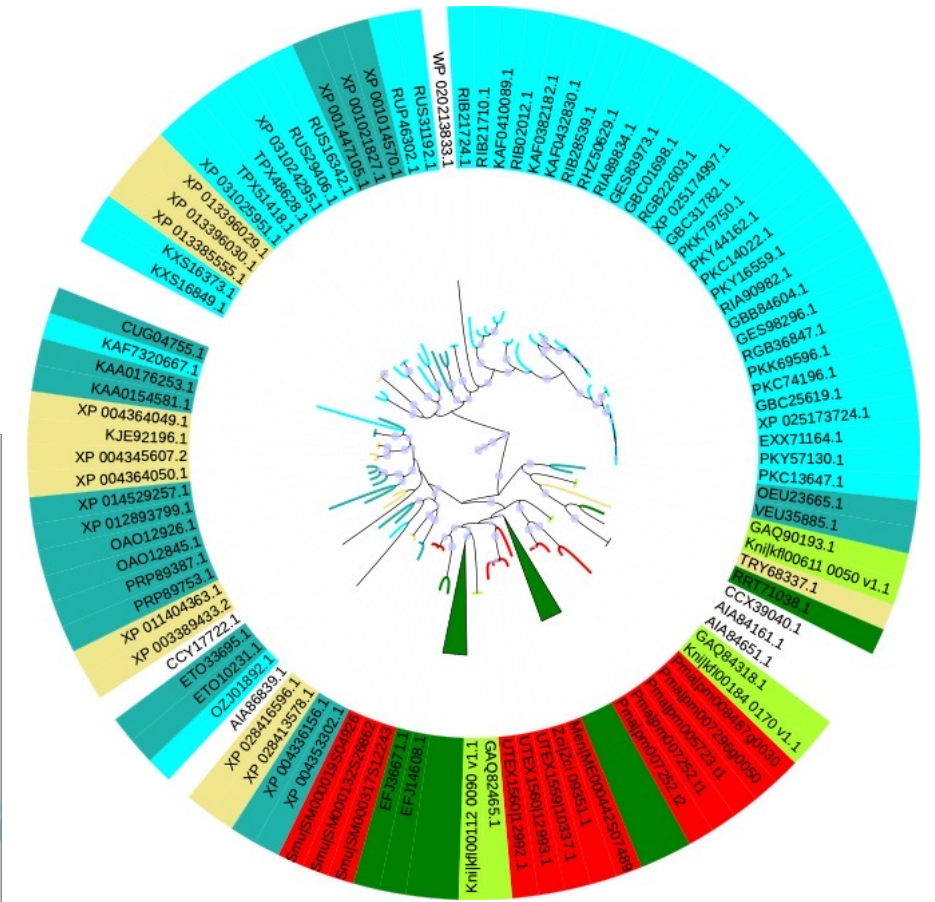

<https://itol.embl.de/tree/20812724022256331665203458>

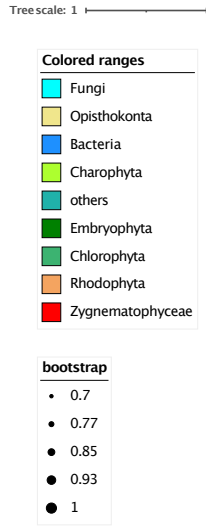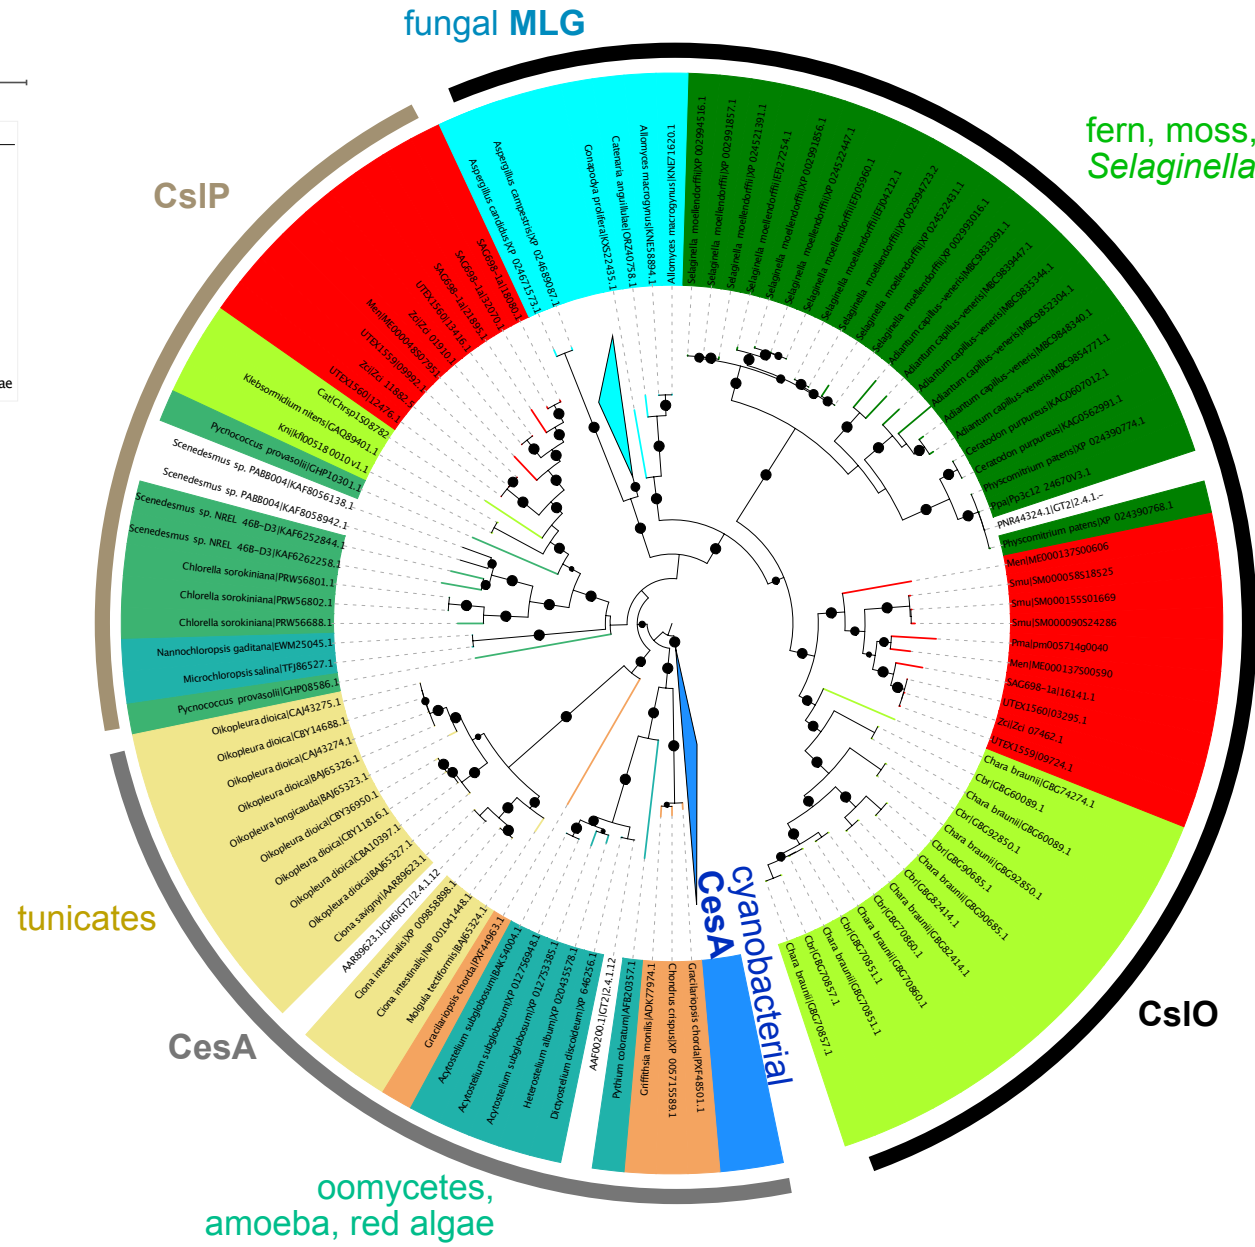

Embryophyta:  
*Adiantum capillus-veneris* (fern)  
*Selaginella moellendorffii* (spike moss)  
*Ceratodon purpureus* (moss)  
*Physcomitrium patens* (moss)

Chlorophyta:  
*Scenedesmus sp. NREL 46B-D3*  
Stramenopiles:  
*Nannochloropsis gaditana*

oomycetes,  
amoeba, red algae

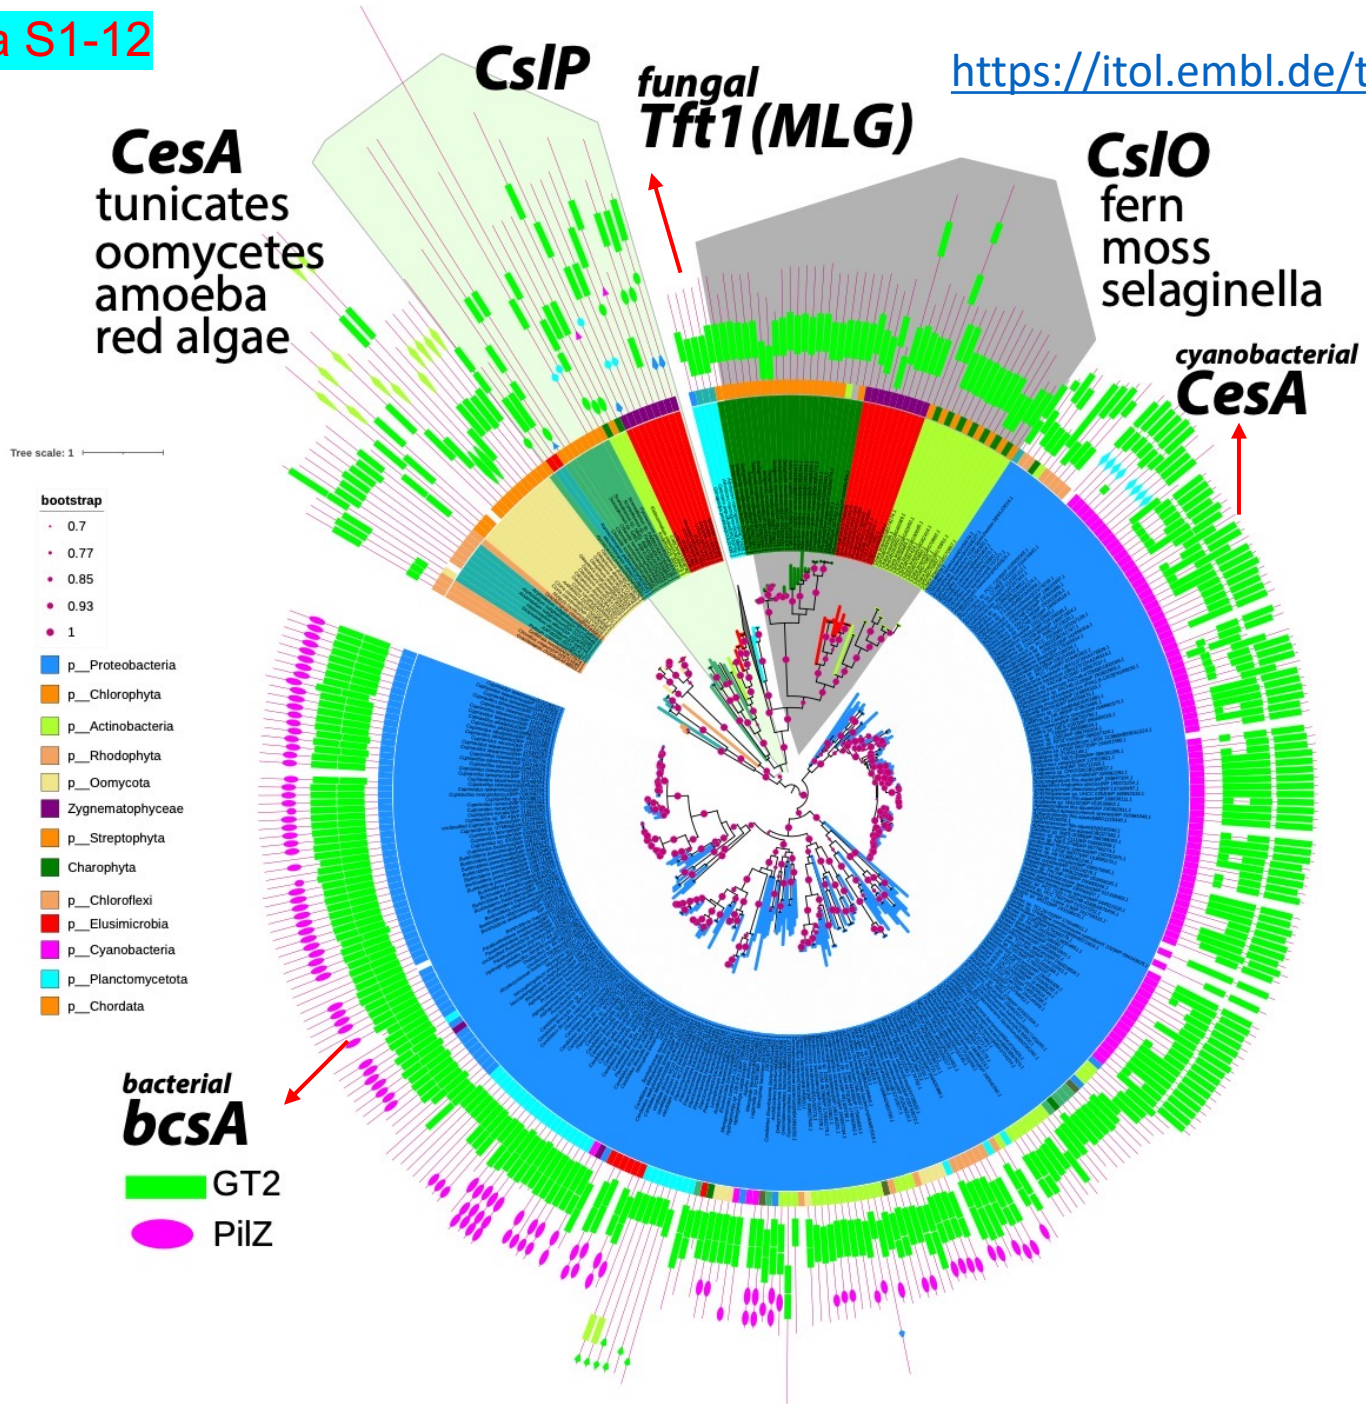

Tree scale: 1

**bootstrap**

- 0.7
- 0.77
- 0.85
- 0.93
- 1

**strip**

- p\_\_unclassified Bacteria phylum
- Zygnematophyceae
- p\_\_Chloroflexi
- p\_\_Deinococcus-Thermus
- p\_\_Atribacterota
- p\_\_Proteobacteria
- p\_\_Actinobacteria

**domain**

- Glyco\_tranf\_2\_3
- ◆ other

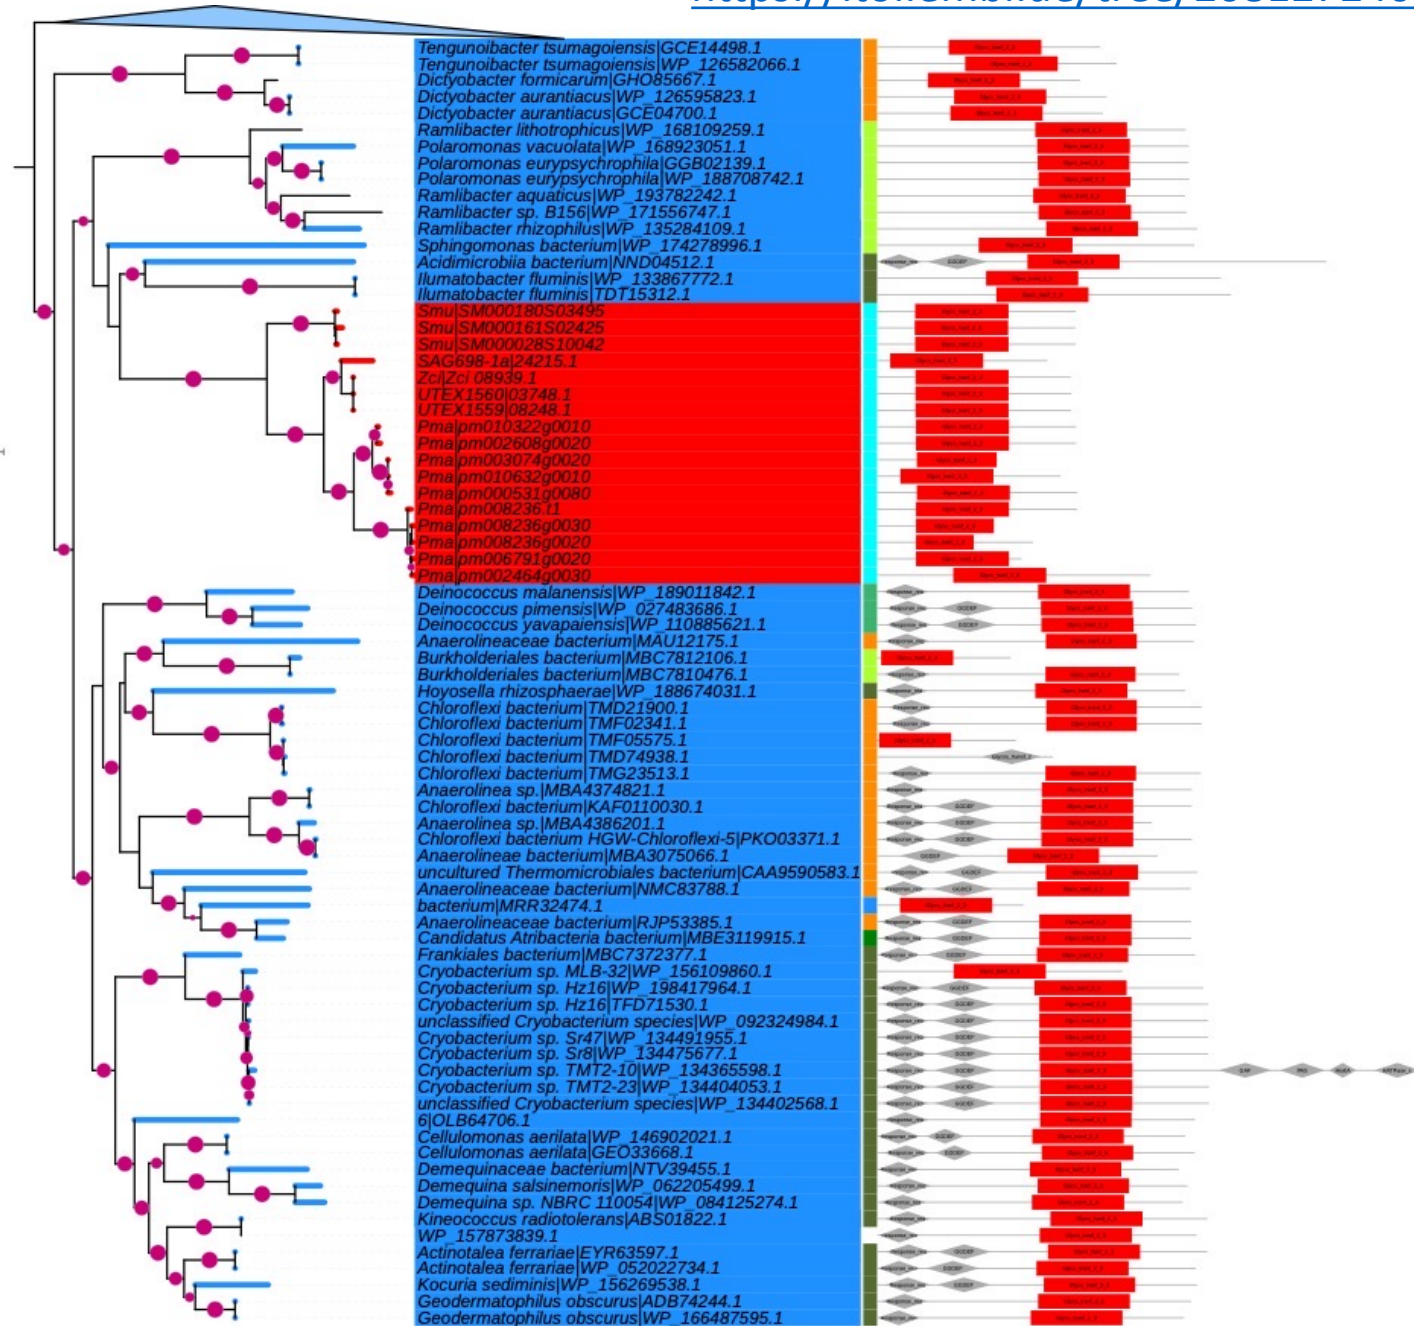

CsIN might have been gained via HGT from bacteria (bcsA)

# Xyloglucan

## Xyloglucan

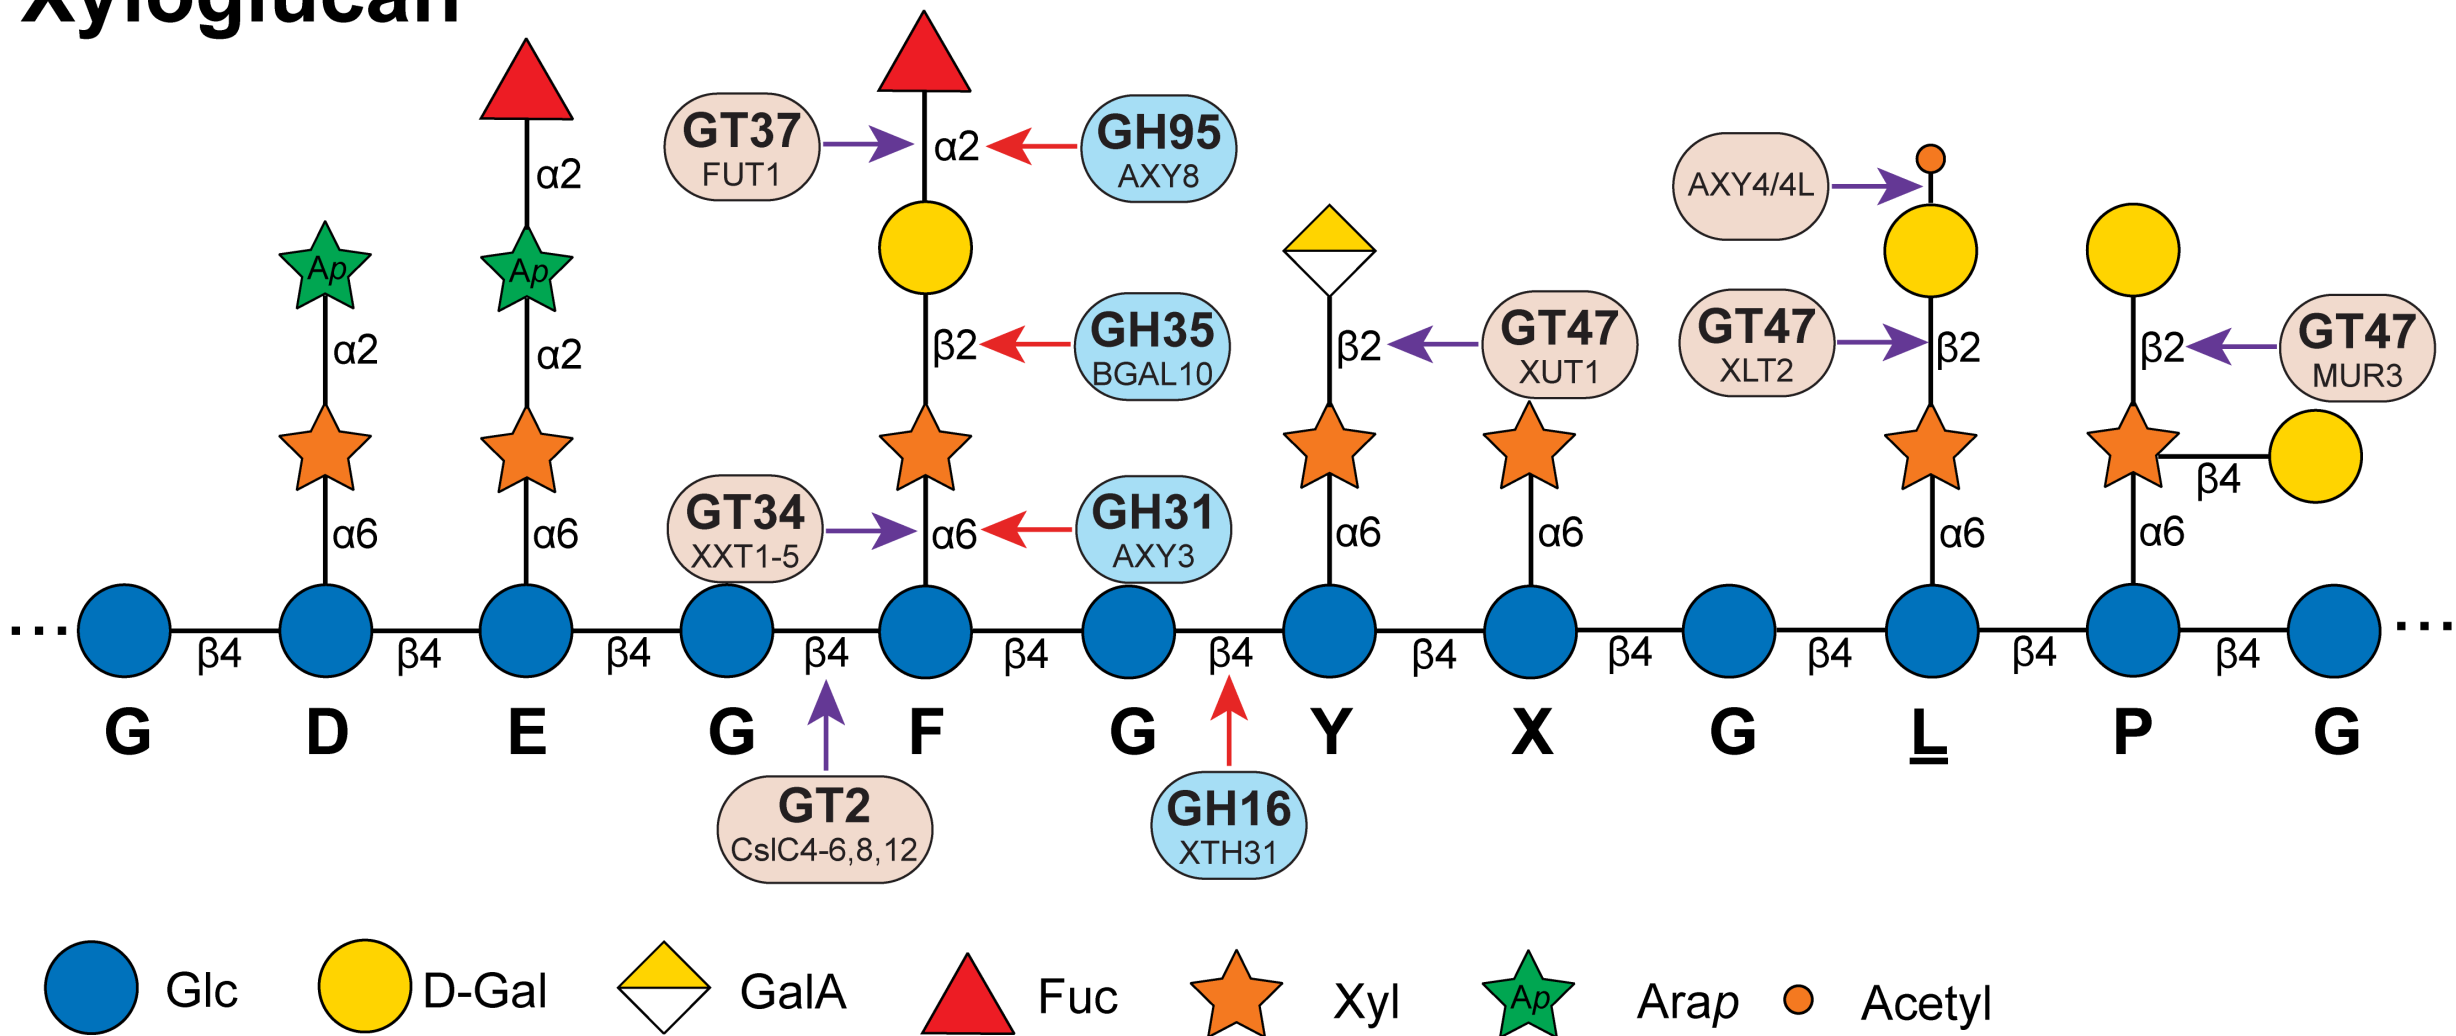

# GT34

Tree scale: 1

## Xyloglucan

- XXT5 (AT1G74380)
- XXT4 (AT1G18690)
- XXT3 (AT5G07720)
- XXT2 (AT4G02500)
- XXT1 (AT3G62720)

Faik A, Price NJ, Raikhel NV, Keegstra K. An Arabidopsis gene encoding an alpha-xylosyltransferase involved in xyloglucan biosynthesis. Proc Natl Acad Sci U S A. 2002 May 28;99(11):7797-802. doi: 10.1073/pnas.102644799.

Cavaler DM, Keegstra K. Two xyloglucan xylosyltransferases catalyze the addition of multiple xylosyl residues to celohexaose. J Biol Chem. 2006 Nov 10;281(45):34197-207. doi: 10.1074/jbc.M606379200.

Vuttipongchaikij S, Brocklehurst D, Steele-King C, Ashford DA, Gomez LD, McQueen-Mason SJ. Arabidopsis GT34 family contains five xyloglucan  $\alpha$ -1,6-xylosyltransferases. New Phytol. 2012 Aug;195(3):585-595. doi: 10.1111/j.1469-8137.2012.04196.x.

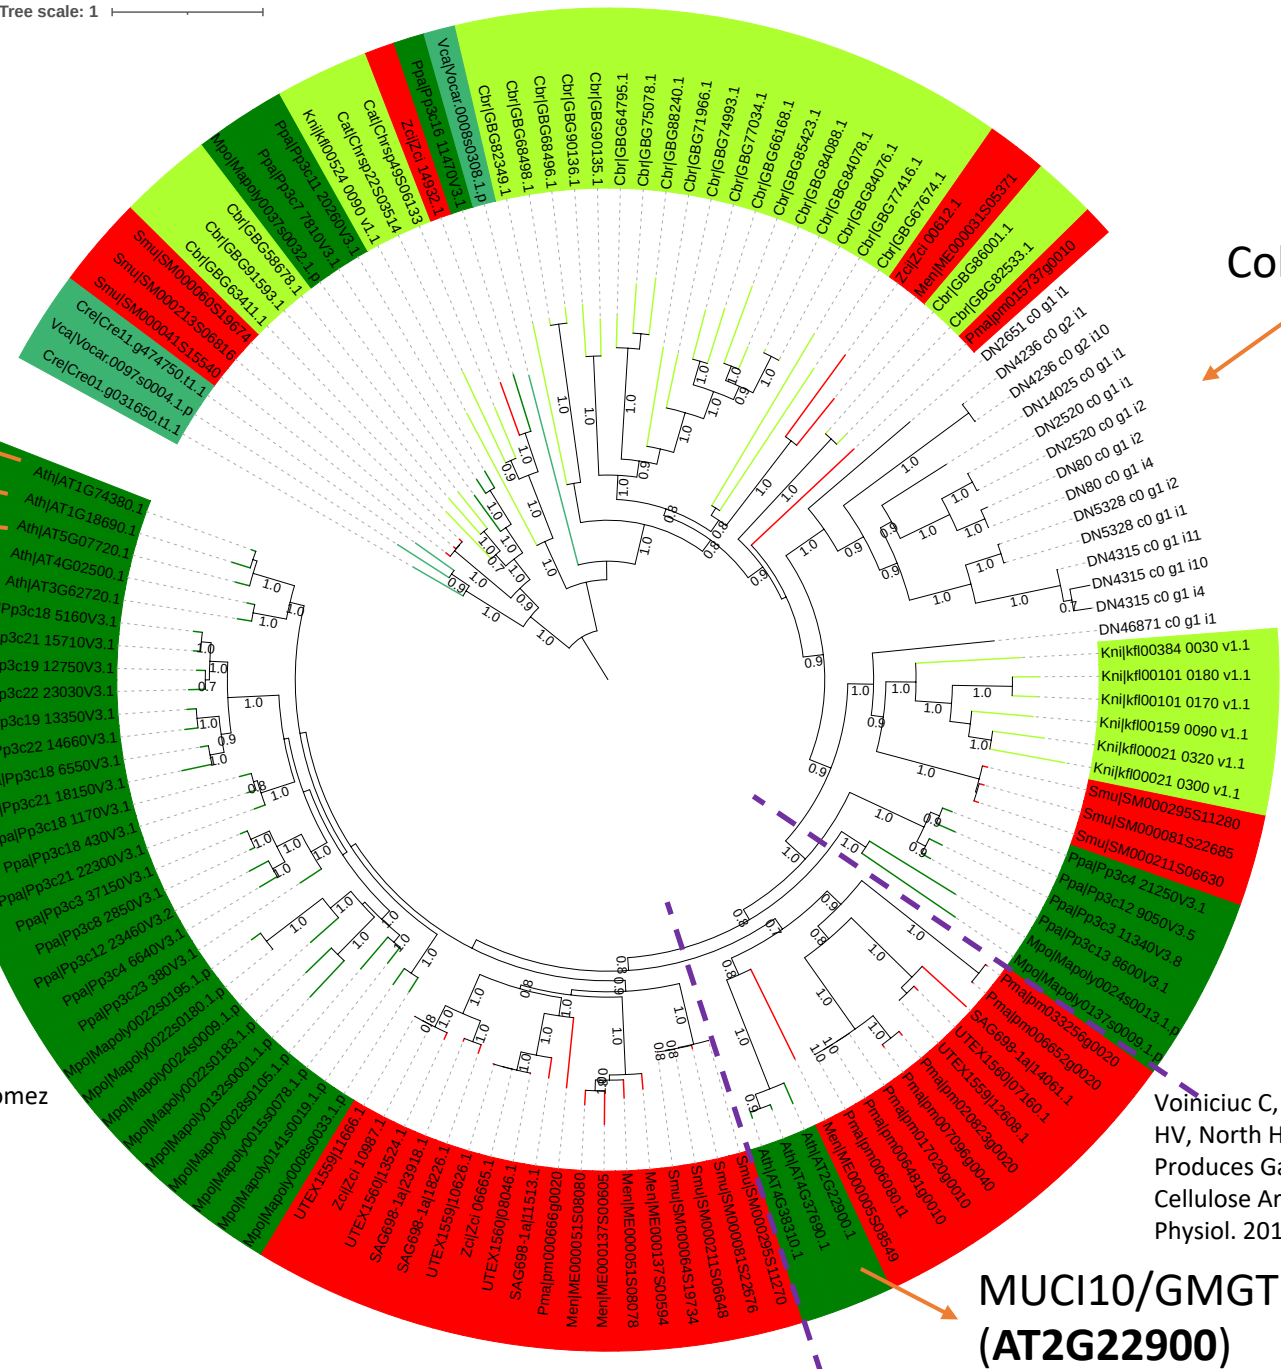

Coleochaete scutate

Mannan  
galactomannan  $\alpha$ -1,6-  
galactosyltransferase  
activity

MUCI10/GMGT  
(AT2G22900)

Voiniciu C, Schmidt MH, Berger A, Yang B, Ebert B, Scheller HV, North HM, Usadel B, Günl M. MUCILAGE-RELATED10 Produces Galactoglucomannan That Maintains Pectin and Cellulose Architecture in Arabidopsis Seed Mucilage. Plant Physiol. 2015 Sep;169(1):403-20. doi: 10.1104/pp.15.00851.



## Data S1-16

Madson M, Dunand C, Li X, Verma R, Vanzin GF, Caplan J, Shoue DA, Carpita NC, Reiter WD. The MUR3 gene of Arabidopsis encodes a xyloglucan galactosyltransferase that is evolutionarily related to animal exostosins. *Plant Cell*. 2003 Jul;15(7):1662-70. doi: 10.1105/tpc.009837.

## MUR3 (AT2G20370)

## XLT2 (AT5G62220)

## XUT1 (AT1G63450)

## Coleochaete scutate Coleochaete orbicularis

Jensen JK, Schultink A, Keegstra K, Wilkerson CG, Pauly M. RNA-Seq analysis of developing nasturtium seeds (*Tropaeolum majus*): identification and characterization of an additional galactosyltransferase involved in xyloglucan biosynthesis. *Mol Plant*. 2012 Sep;5(5):984-92. doi: 10.1093/mp/sss032.

Peña MJ, Kong Y, York WS, O'Neill MA. A galacturonic acid-containing xyloglucan is involved in Arabidopsis root hair tip growth. *Plant Cell*. 2012 Nov;24(11):4511-24. doi: 10.1105/tpc.112.103390.

Tree scale: 1

## XyG

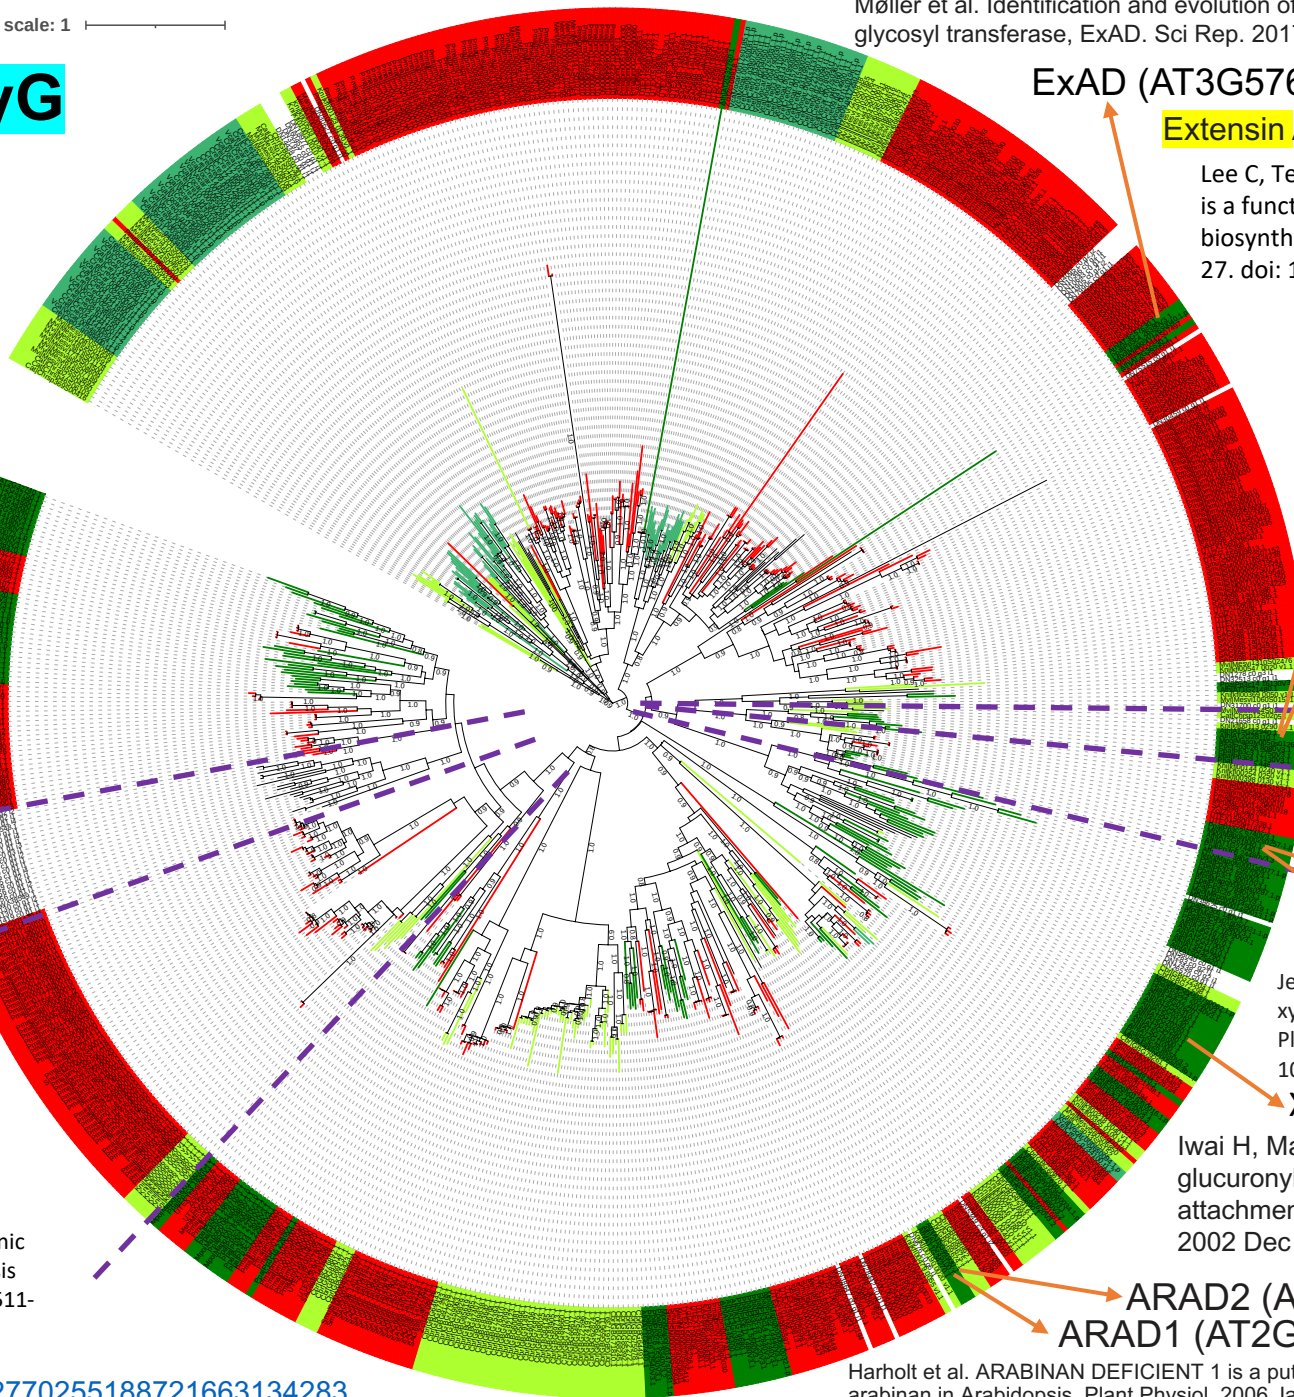

Møller et al. Identification and evolution of a plant cell wall specific glycoprotein glycosyl transferase, ExAD. *Sci Rep*. 2017 Mar 30;7:45341. doi: 10.1038/srep45341

# GT47

## ExAD (AT3G57630)

## Extensin Arabinose Deficient transferase

Lee C, Teng Q, Huang W, Zhong R, Ye ZH. The F8H glycosyltransferase is a functional paralog of FRA8 involved in glucuronoxylan biosynthesis in Arabidopsis. *Plant Cell Physiol*. 2009 Apr;50(4):812-27. doi: 10.1093/pcp/pcp025. Epub 2009 Feb 18. PMID: 19224953.

Brown, D.M., Goubet, F., Wong, V.W., Goodacre, R., Stephens, E., Dupree, P., and Turner, S.R. (2007). Comparison of five xylan synthesis mutants reveals new insight into the mechanisms of xylan synthesis. *Plant J*. 52: 1154–1168.

## F8H (AT5G22940)

## IRX7/FRA8 (AT2G28110)

## NpGUT1: pectin b-glucuronyltransferase transferring glucuronic acid to RG-II

Urbaniowicz BR, Peña MJ, Moniz HA, Moremen KW, York WS. 2014. Two Arabidopsis proteins synthesize acetylated xylan in vitro. *Plant Journal* 80: 197–206.

Jensen JK, Busse-Wicher M, Poulsen CP, Fangel JU, Smith PJ, Yang JY, Peña MJ, Dinesen MH, Martens HJ, Melkonian M et al. 2018. Identification of an algal xylan synthase indicates that there is functional orthology between algal and plant cell wall biosynthesis. *New Phytologist* 218: 1049–1060.

## XYS1/IRX10-L (AT5G61840)

## IRX10 (AT1G27440)

## Xylan

Jensen et al. Identification of a xylogalacturonan xylosyltransferase involved in pectin biosynthesis in Arabidopsis. *Plant Cell*. 2008 May;20(5):1289-302. doi: 10.1105/tpc.107.050906

## XGD1 (AT5G33290)

## XGA

Iwai H, Masaoka N, Ishii T, Satoh S. A pectin glucuronyltransferase gene is essential for intercellular attachment in the plant meristem. *Proc Natl Acad Sci U S A*. 2002 Dec 10;99(25):16319-24. doi: 10.1073/pnas.252530499.

## ARAD2 (AT5G44930)

## ARAD1 (AT2G35100)

## RG-I

Harholt et al. ARABINAN DEFICIENT 1 is a putative arabinosyltransferase involved in biosynthesis of pectic arabinan in Arabidopsis. *Plant Physiol*. 2006 Jan;140(1):49-58. doi: 10.1104/pp.105.072744.

Data S1-17

GT47

<https://itol.embl.de/tree/2081278868477251663179754>

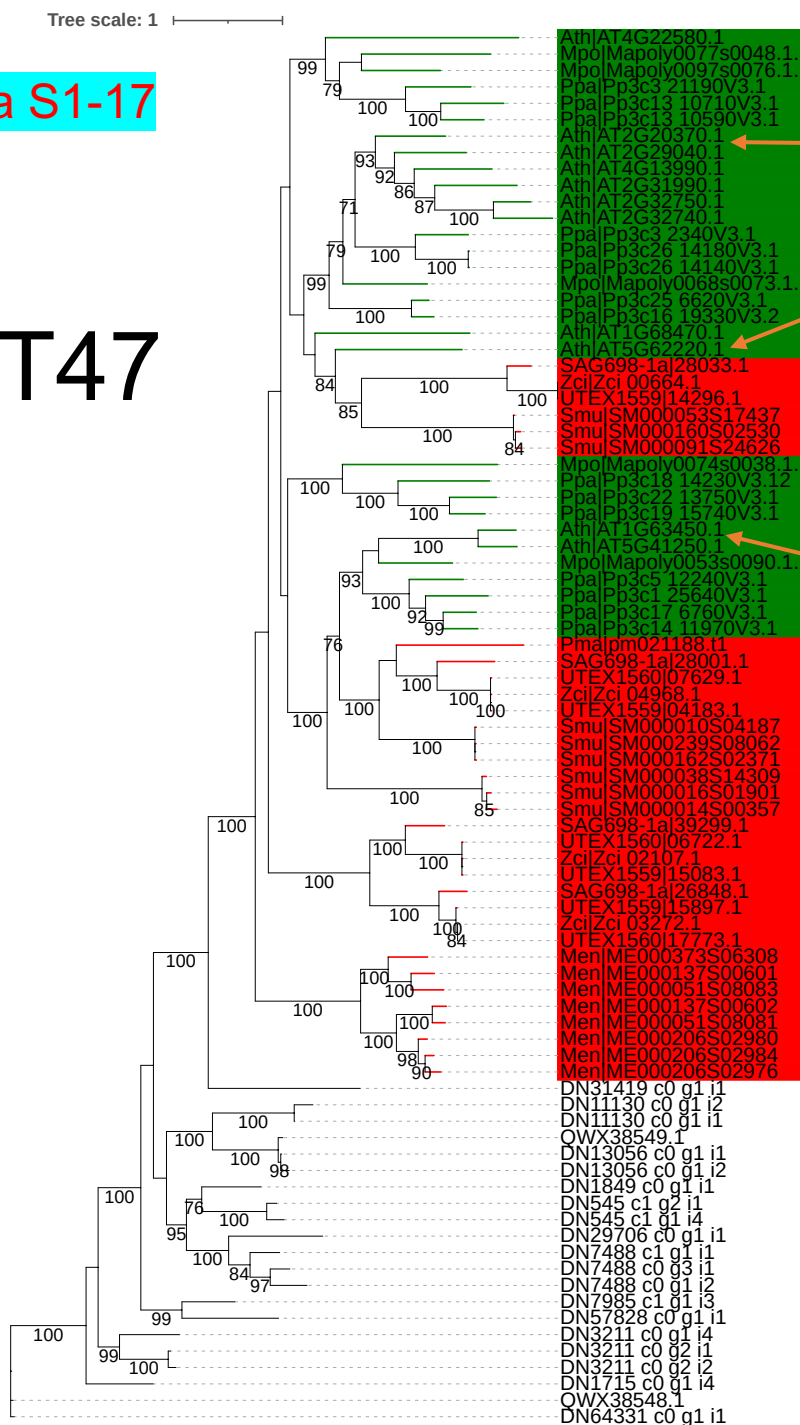

MUR3 (AT2G20370)

XLT2 (AT5G62220)

XUT1 (AT1G63450)

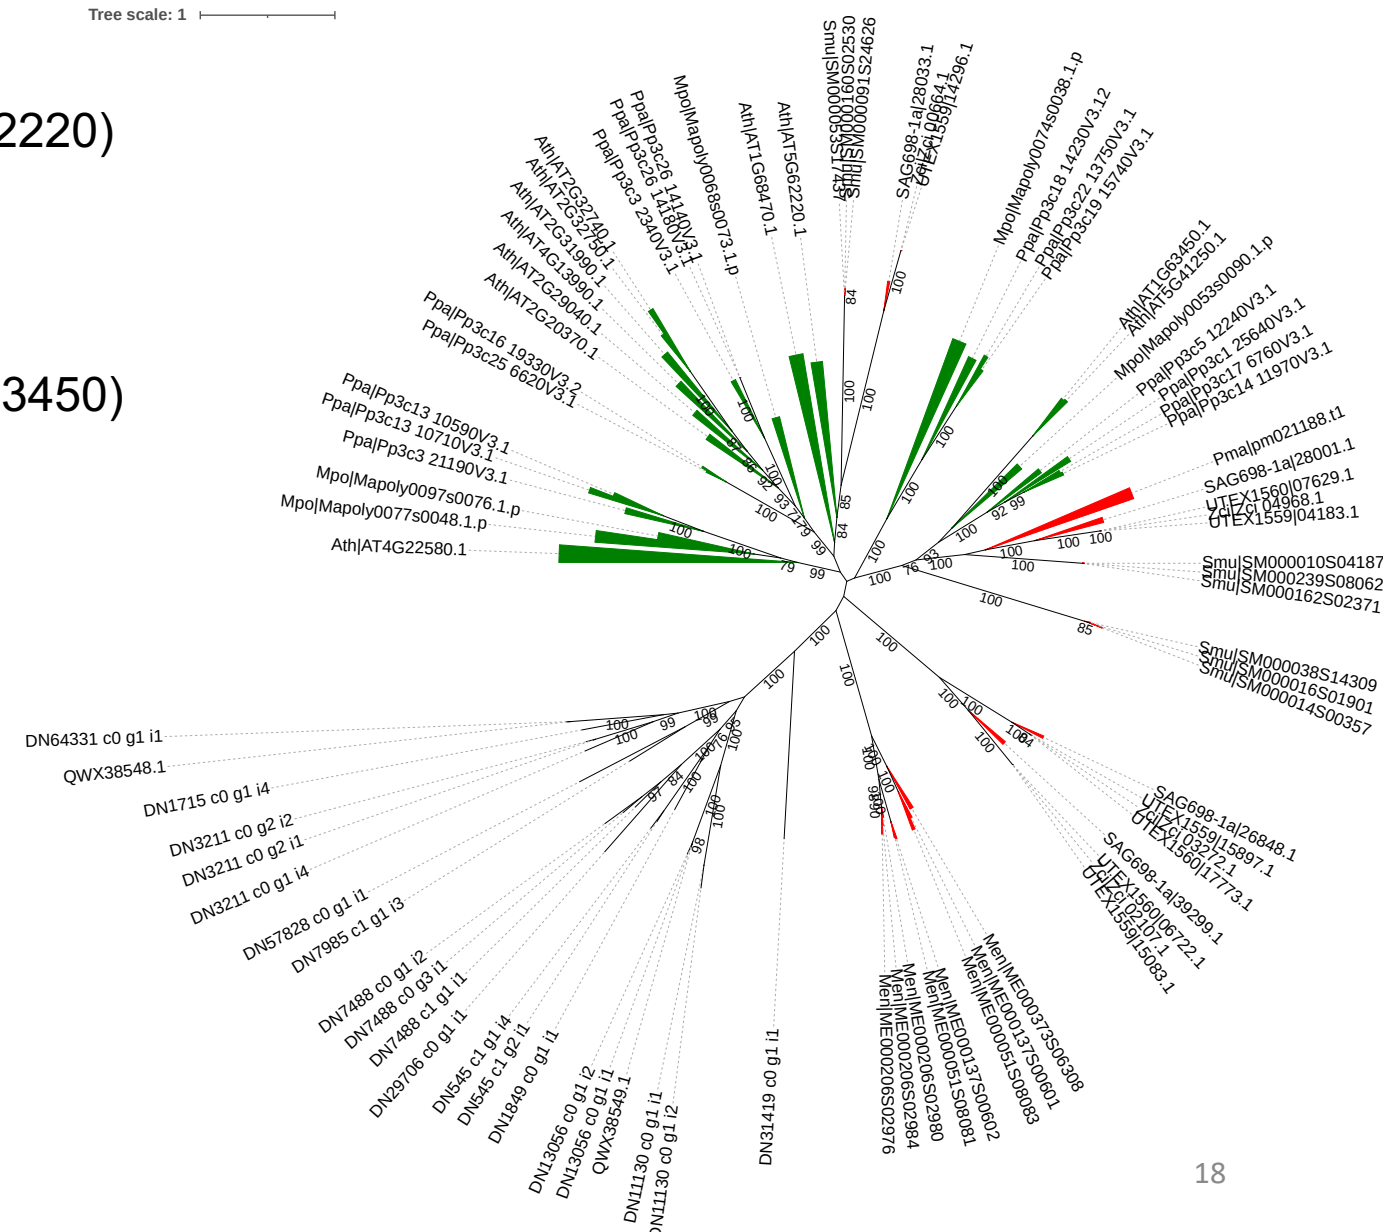

# GT37

Tree scale: 1

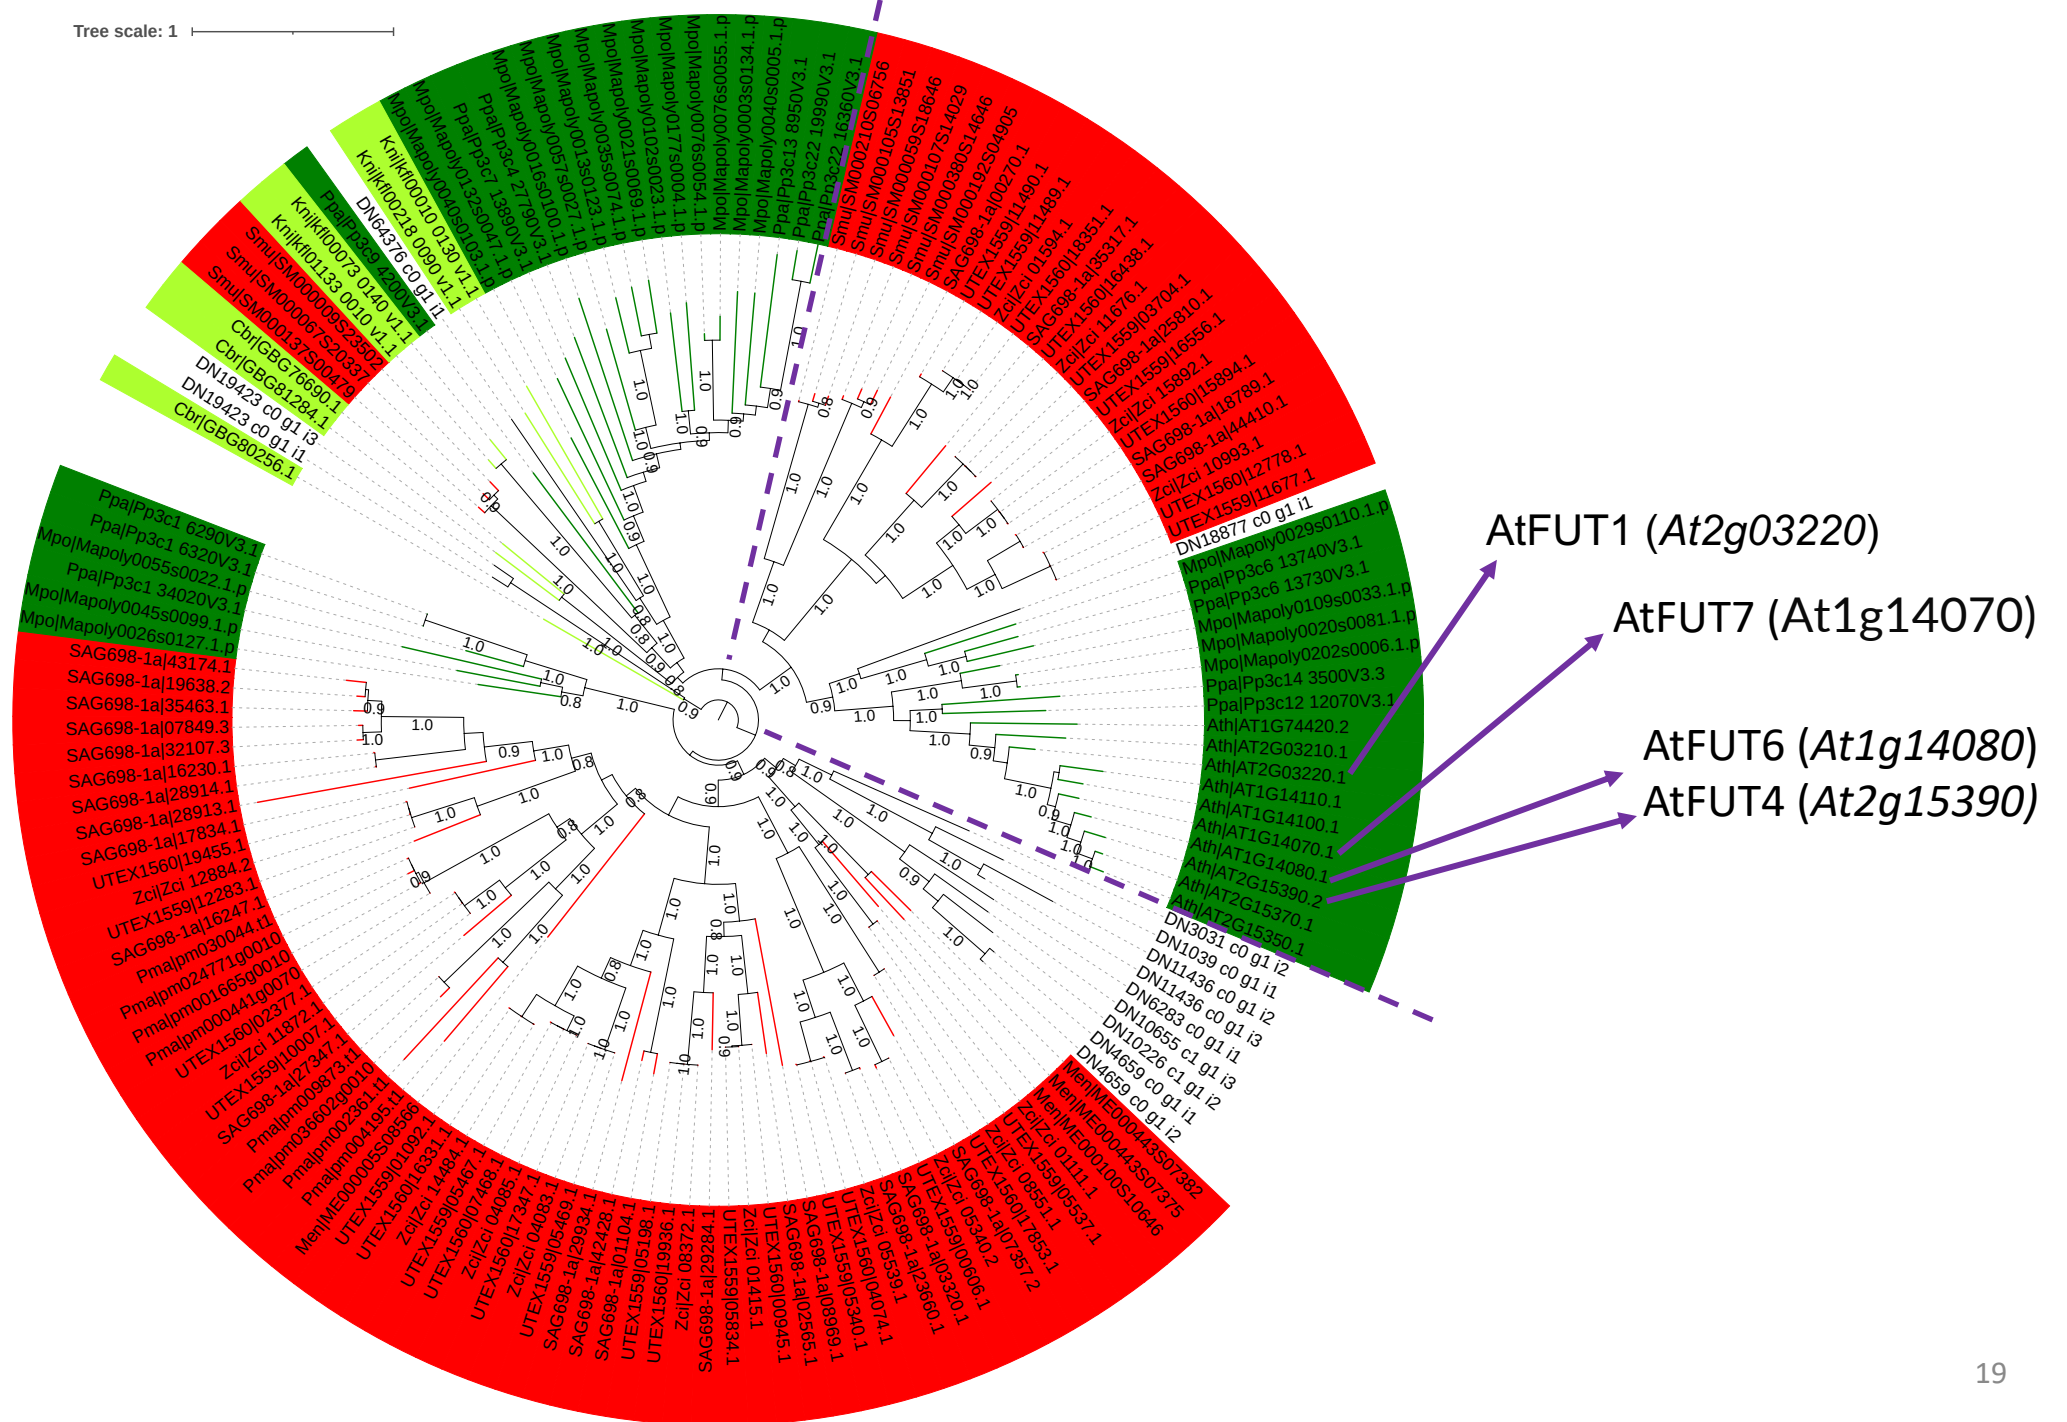

GT37 nr

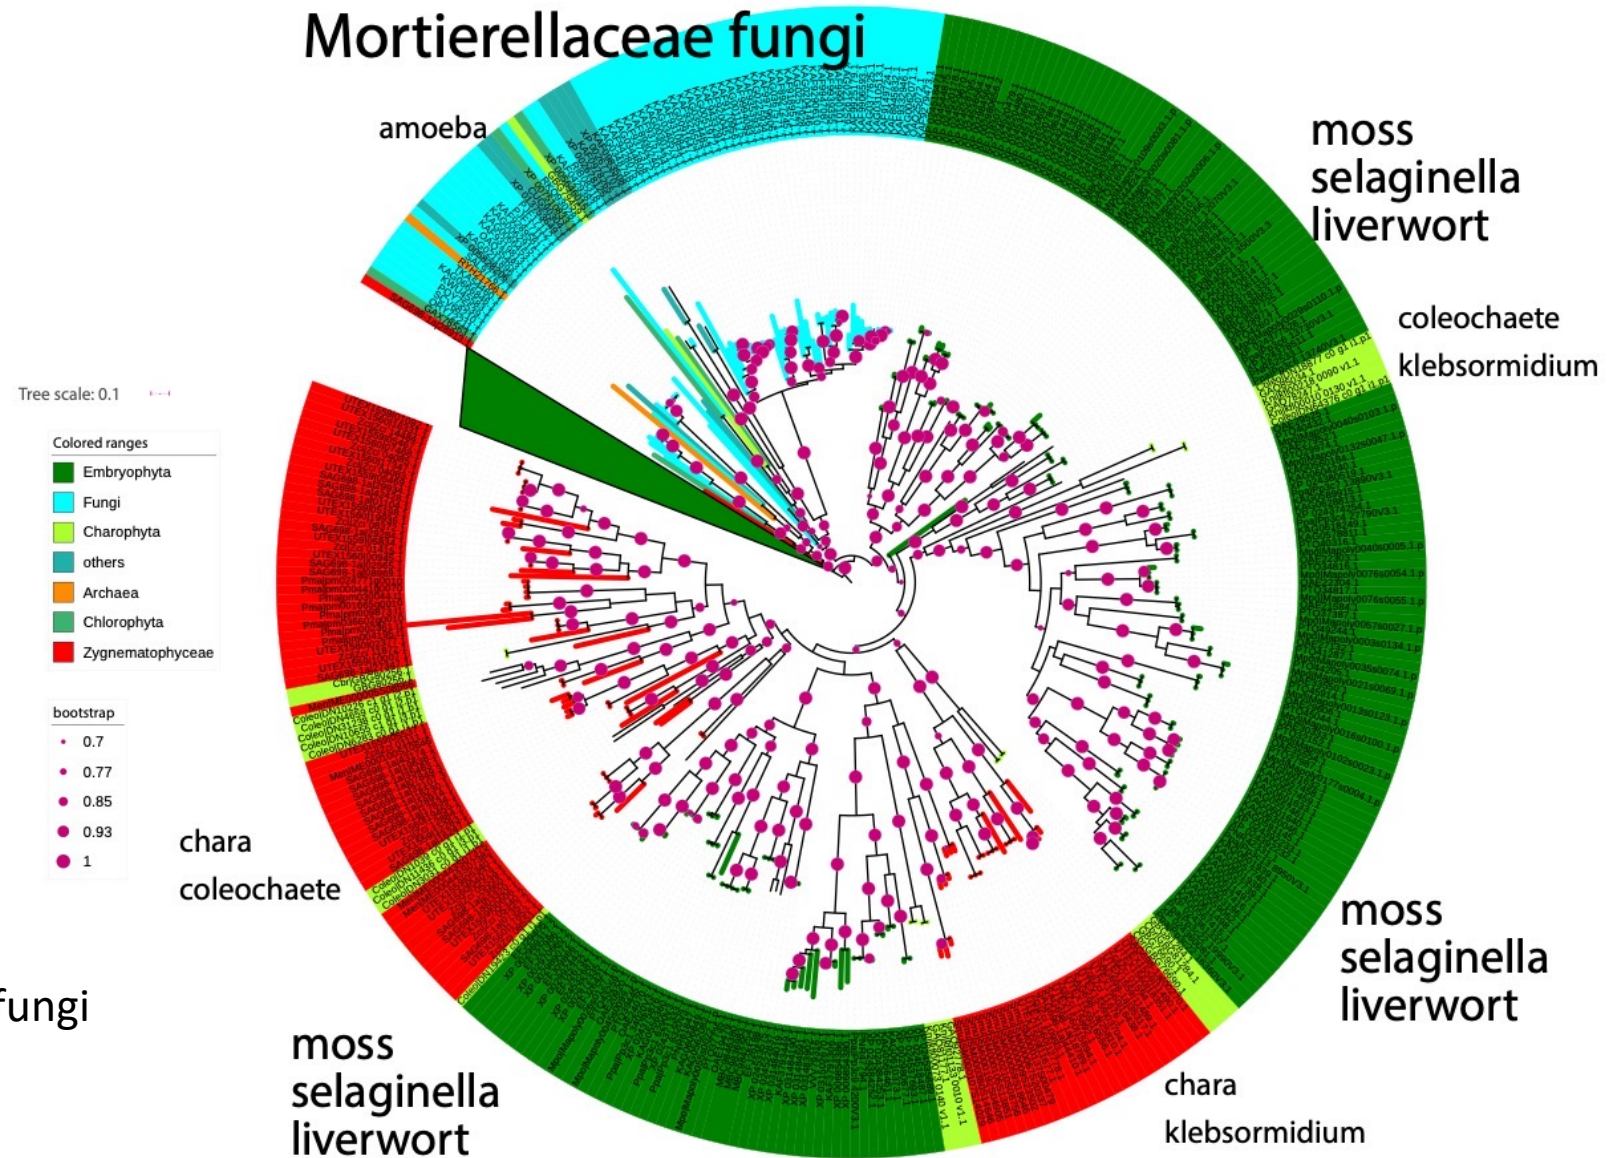

might have been  
gained via HGT from fungi

Tree scale: 1

## Colored ranges

- Zygomatophyceae
- Embryophyta
- Charophyta

## bootstrap

- 0.8
- 0.85
- 0.9
- 0.95
- 1

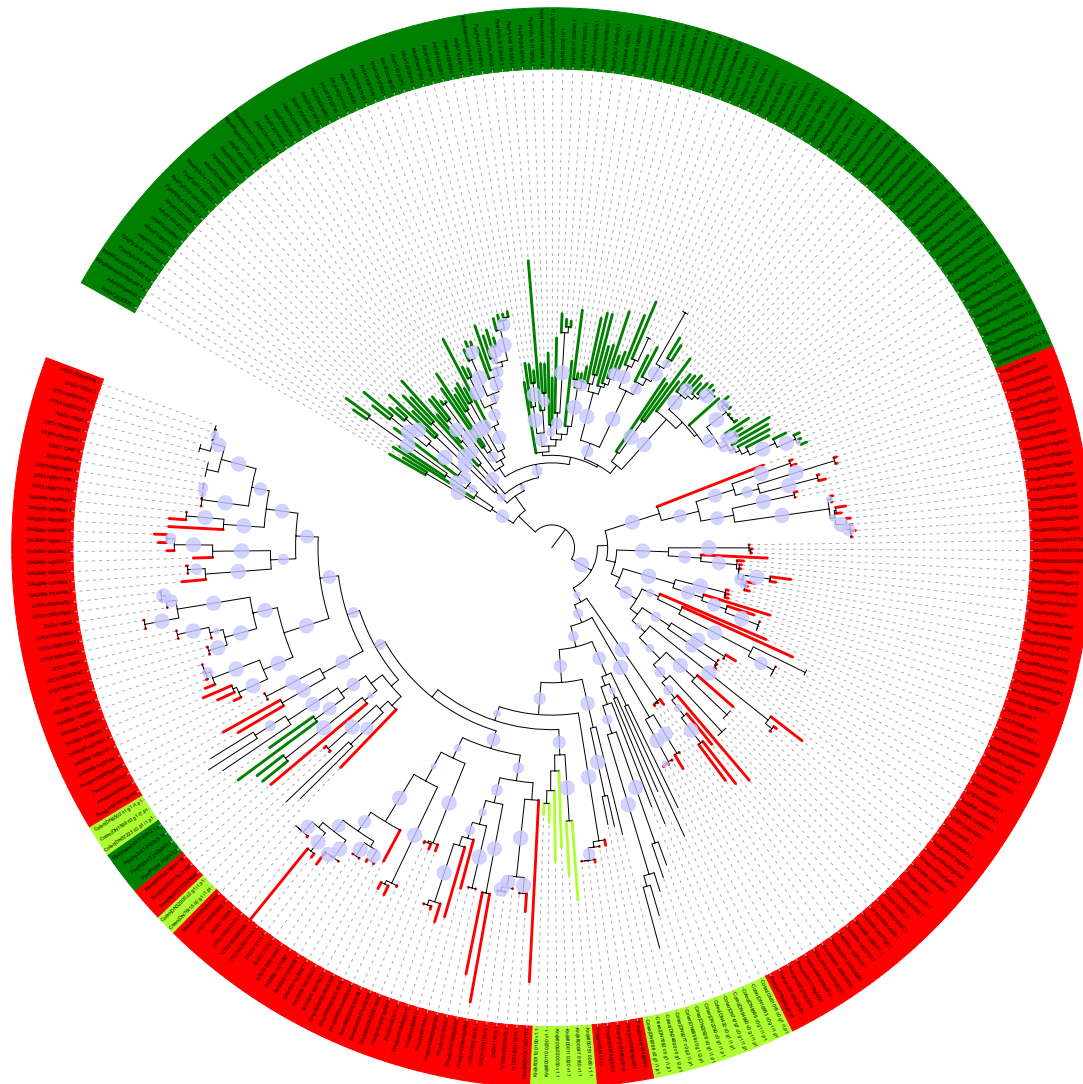

xyloglucan endotransferase

XTH4 (AT2G06850)

XTH15 (AT4G14130)

XTH14 (AT4G25820)

XTH24 (AT4G30270)

XTH22 (AT5G57560)

XTH32 (AT2G36870)

XTH31 (AT3G44990)

xyloglucanase

<https://itol.embl.de/tree/208127240222342461668379872>

# GH16\_20

Putative HGT of XTH between fungi and streptophyte algae (Shinohara and Nishitani, 2021).

XTH genes are expanded in Zygnemophyceae (1b has 16 genes)

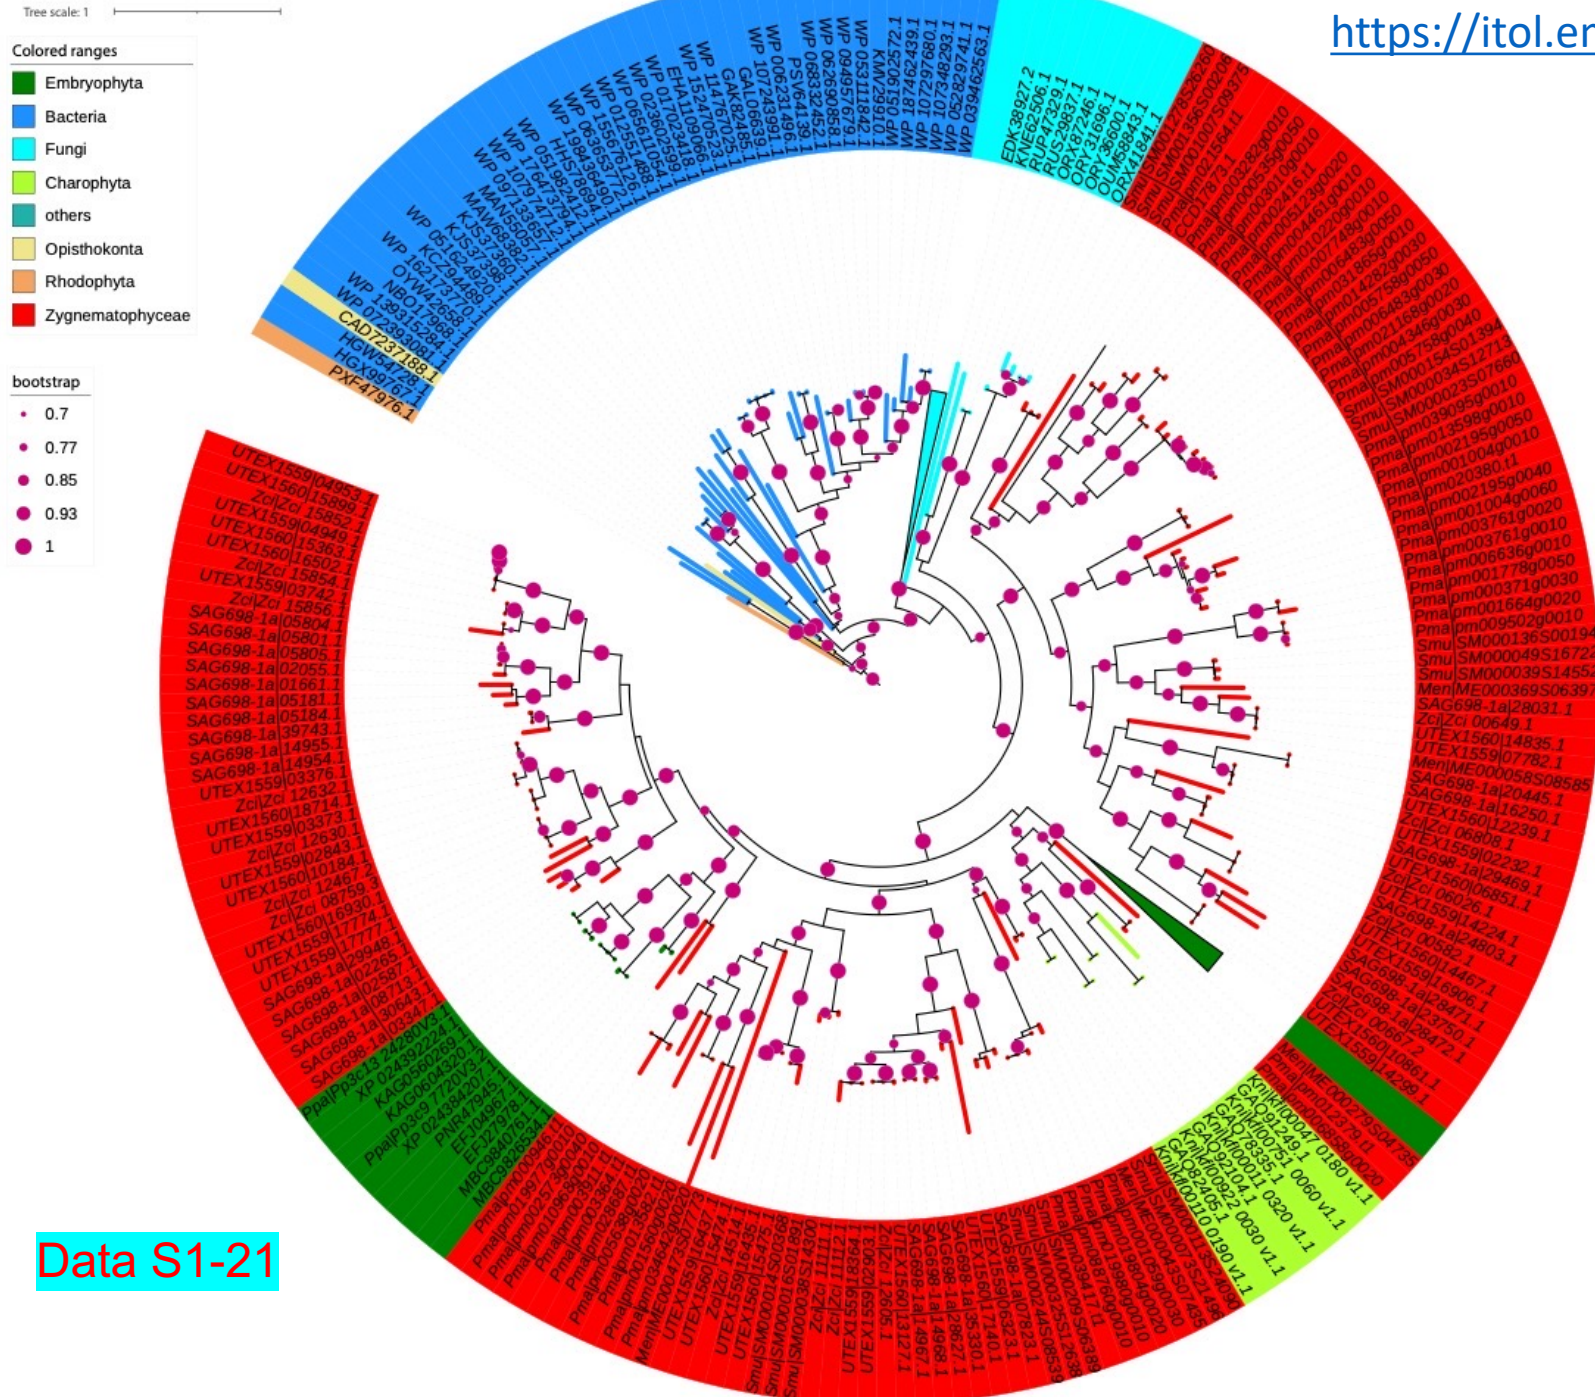

Data S1-21

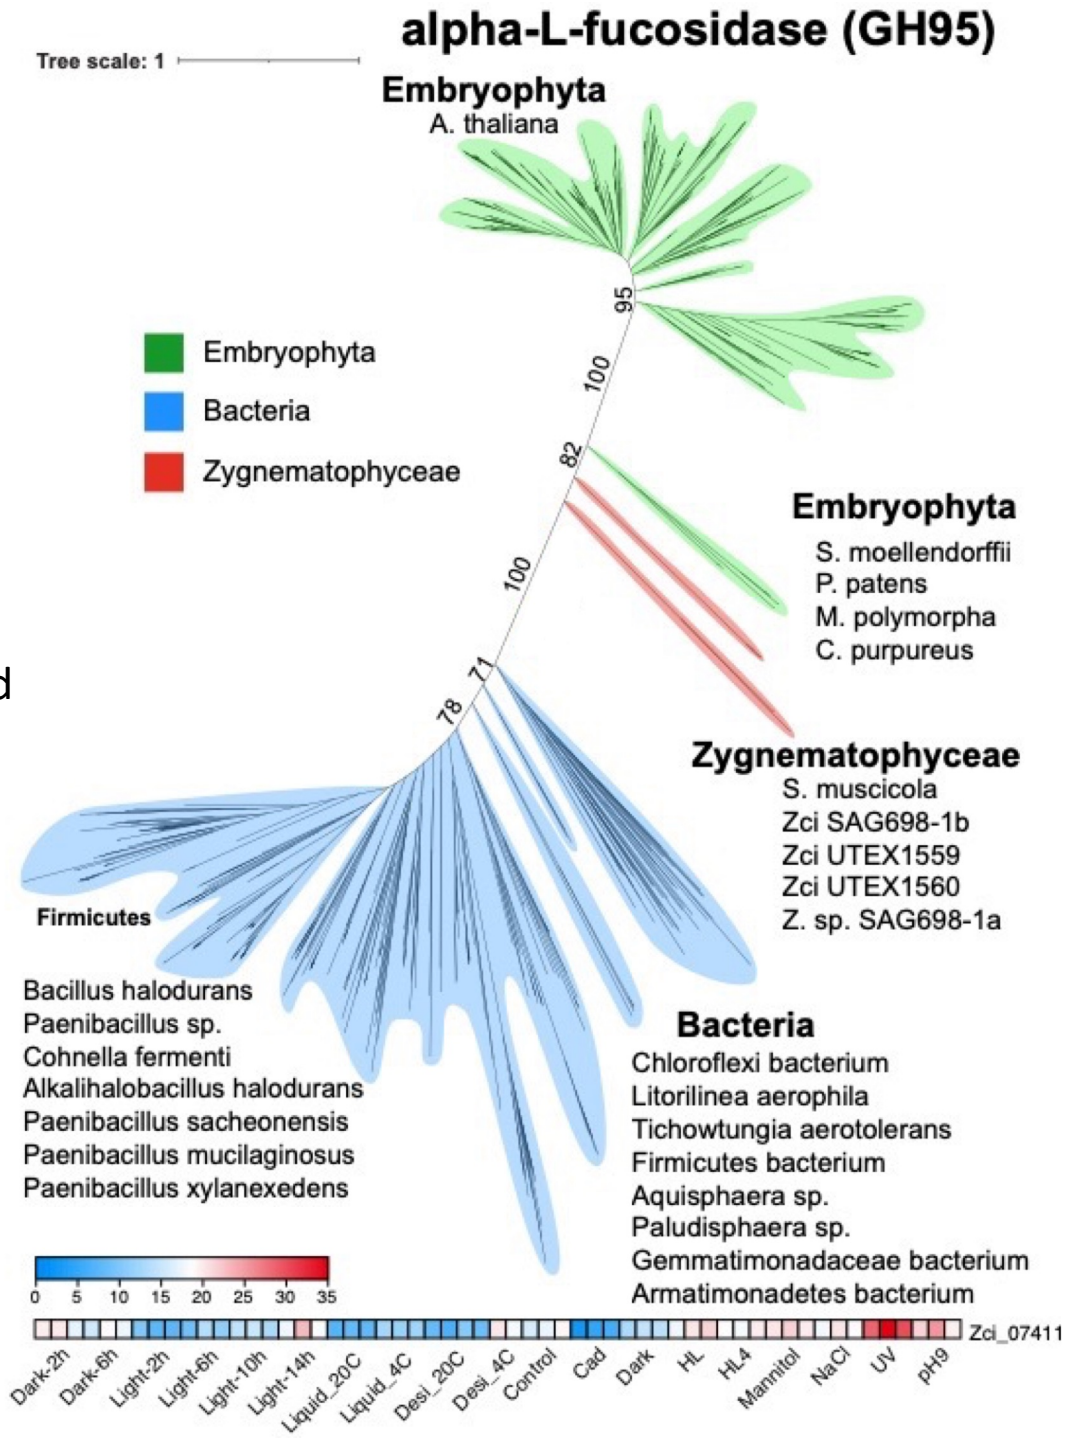

GH95: might have been gained via HGT from bacteria

## Data S1-23

Kotake T, Dina S, Konishi T, Kaneko S, Igarashi K, Samejima M, Watanabe Y, Kimura K, Tsumuraya Y. Molecular cloning of a  $\beta$ -galactosidase from radish that specifically hydrolyzes  $\beta$ -D-galactopyranosyl (1 $\rightarrow$ 3)- and  $\beta$ -D-galactopyranosyl (1 $\rightarrow$ 6)-galactosyl residues of Arabinogalactan protein. *Plant Physiol.* 2005 Jul;138(3):1563-76. doi: 10.1104/pp.105.062562.

Sampedro et al. AtBGAL10 is the main xyloglucan  $\beta$ -galactosidase in Arabidopsis, and its absence results in unusual xyloglucan subunits and growth defects. *Plant Physiol.* 2012 Mar;158(3):1146-57. doi: 10.1104/pp.111.192195.

<https://itol.embl.de/tree/20812724022273791665197706>

<https://itol.embl.de/tree/13423816417179911667574537>

## BGAL8 (AT3G28470)

Ishimaru M, Smith DL, Mort AJ, Gross KC. Enzymatic activity and substrate specificity of recombinant tomato beta-galactosidases 4 and 5. *Planta.* 2009 Jan;229(2):447-56. doi: 10.1007/s00425-008-0842-x.

Eda M, Ishimaru M, Tada T, Sakamoto T, Kotake T, Tsumuraya Y, Mort AJ, Gross KC. Enzymatic activity and substrate specificity of the recombinant tomato  $\beta$ -galactosidase 1. *J Plant Physiol.* 2014 Oct 15;171(16):1454-60. doi: 10.1016/j.jplph.2014.06.010.

## AtBGAL10 (AT5g63810)

## BGAL12 (AT4G26140)

## GH35

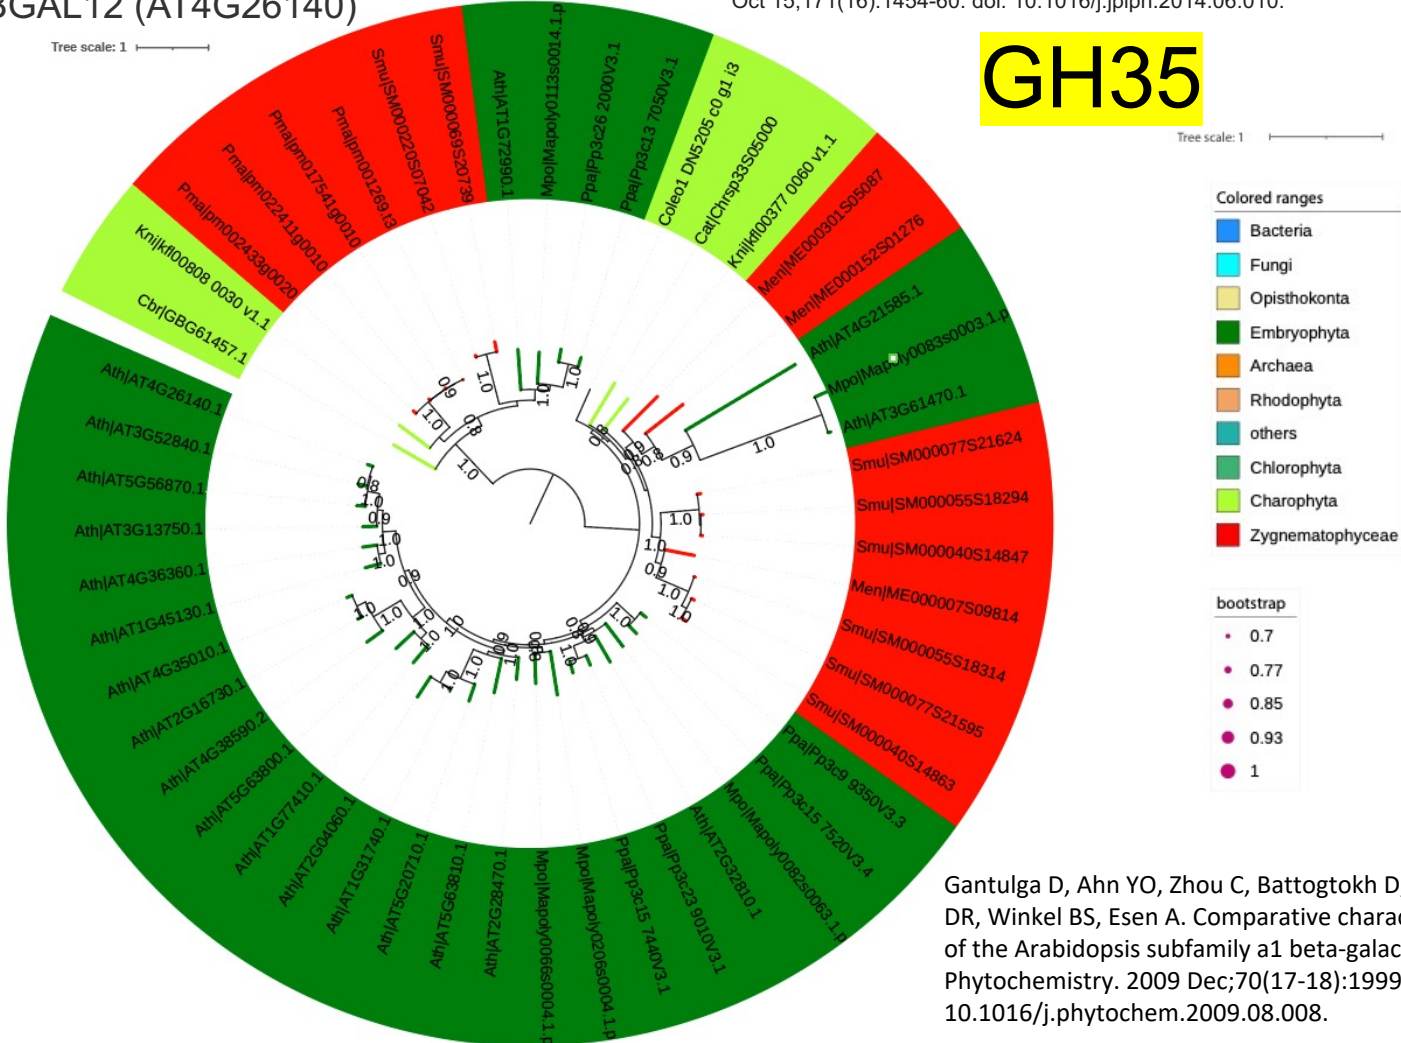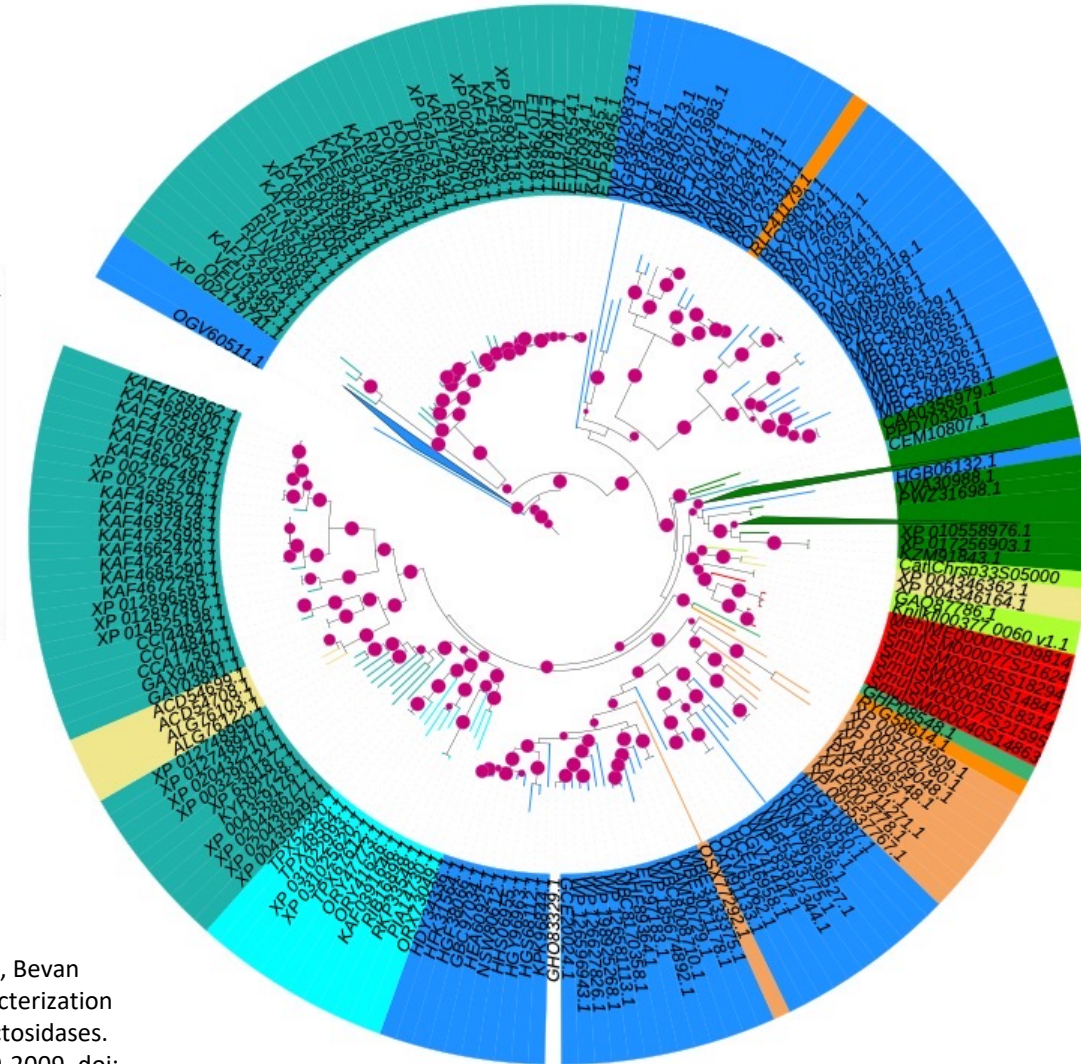

Gantulga D, Ahn YO, Zhou C, Battogtokh D, Bevan DR, Winkel BS, Esen A. Comparative characterization of the Arabidopsis subfamily a1 beta-galactosidases. *Phytochemistry.* 2009 Dec;70(17-18):1999-2009. doi: 10.1016/j.phytochem.2009.08.008.





## Callose: $\beta$ -1,3-glucan

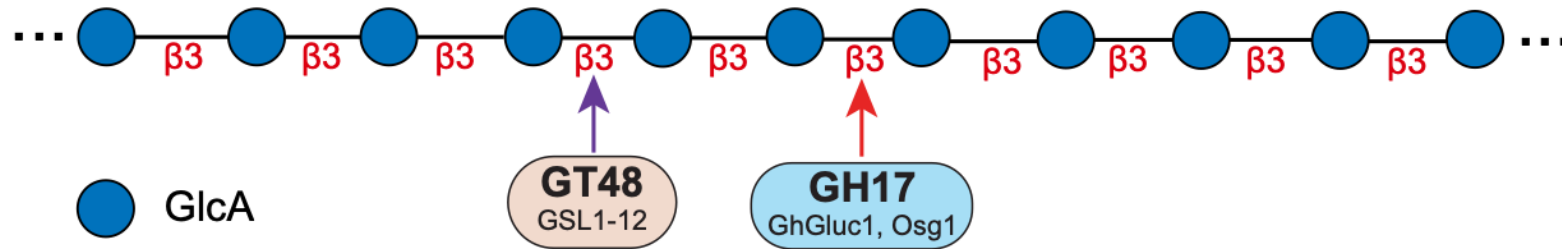

Scherp, P., Grotha, R., and Kutschera, U. (2001). Occurrence and phylogenetic significance of cytokinesis-related callose in green algae, bryophytes, ferns and seed plants. *Plant Cell Reports* 20, 143-149.

Davis, D.J., Wang, M., Sorensen, I., Rose, J.K.C., Domozych, D.S., and Drakakaki, G. (2020). Callose deposition is essential for the completion of cytokinesis in the unicellular alga *Penium margaritaceum*. *J Cell Sci* 133.

Tree scale: 1

# GT48 1,3-β-glucan synthase

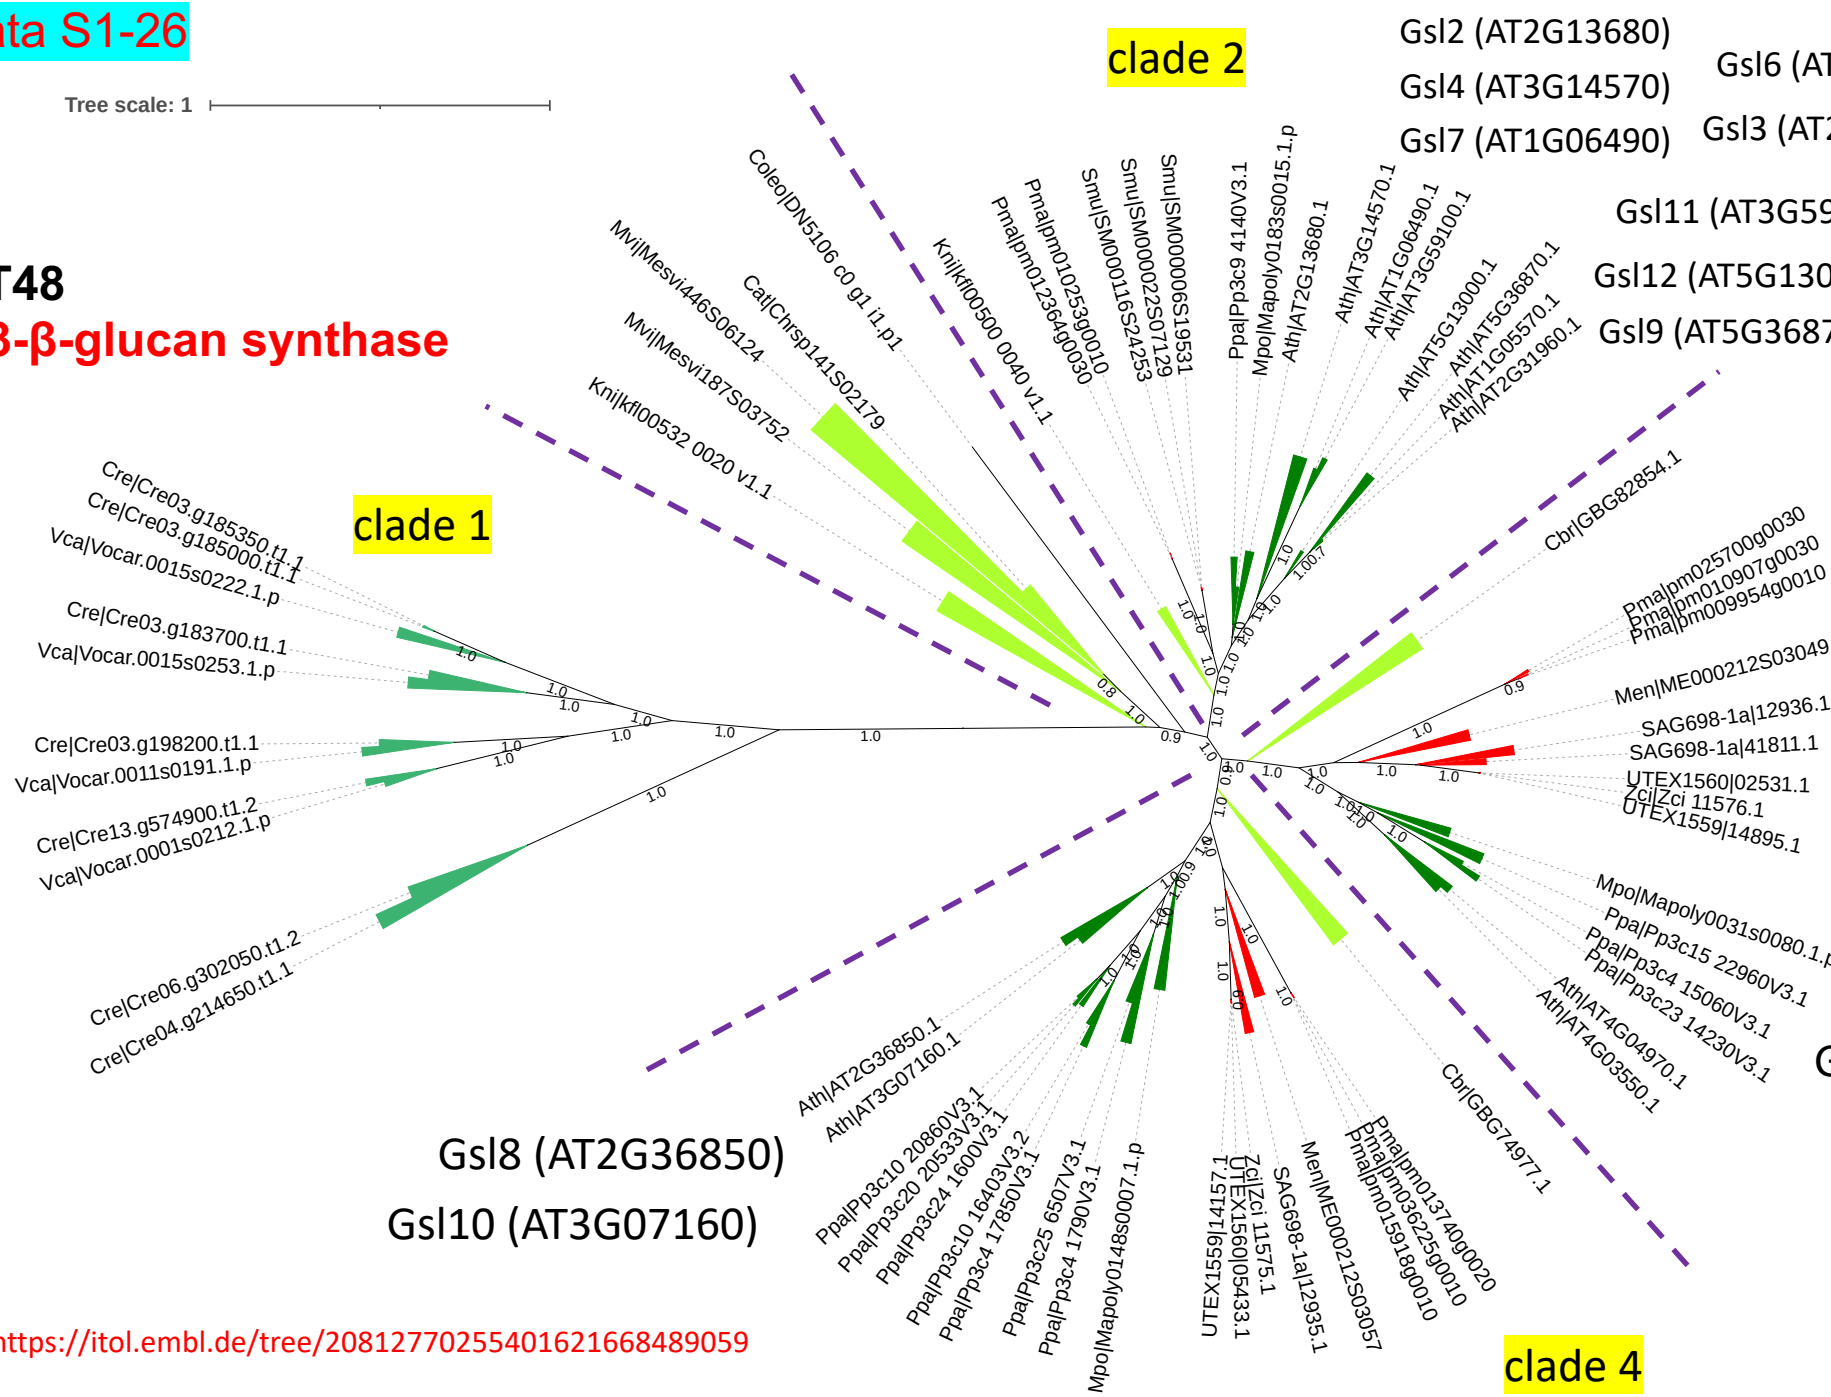

Davis, D.J., Wang, M., Sorensen, I., Rose, J.K.C., Domozych, D.S., and Drakakaki, G. (2020). Callose deposition is essential for the completion of cytokinesis in the unicellular alga *Penium margaritaceum*. J Cell Sci 133.

clade 3

clade 4

GT48  
nr hits

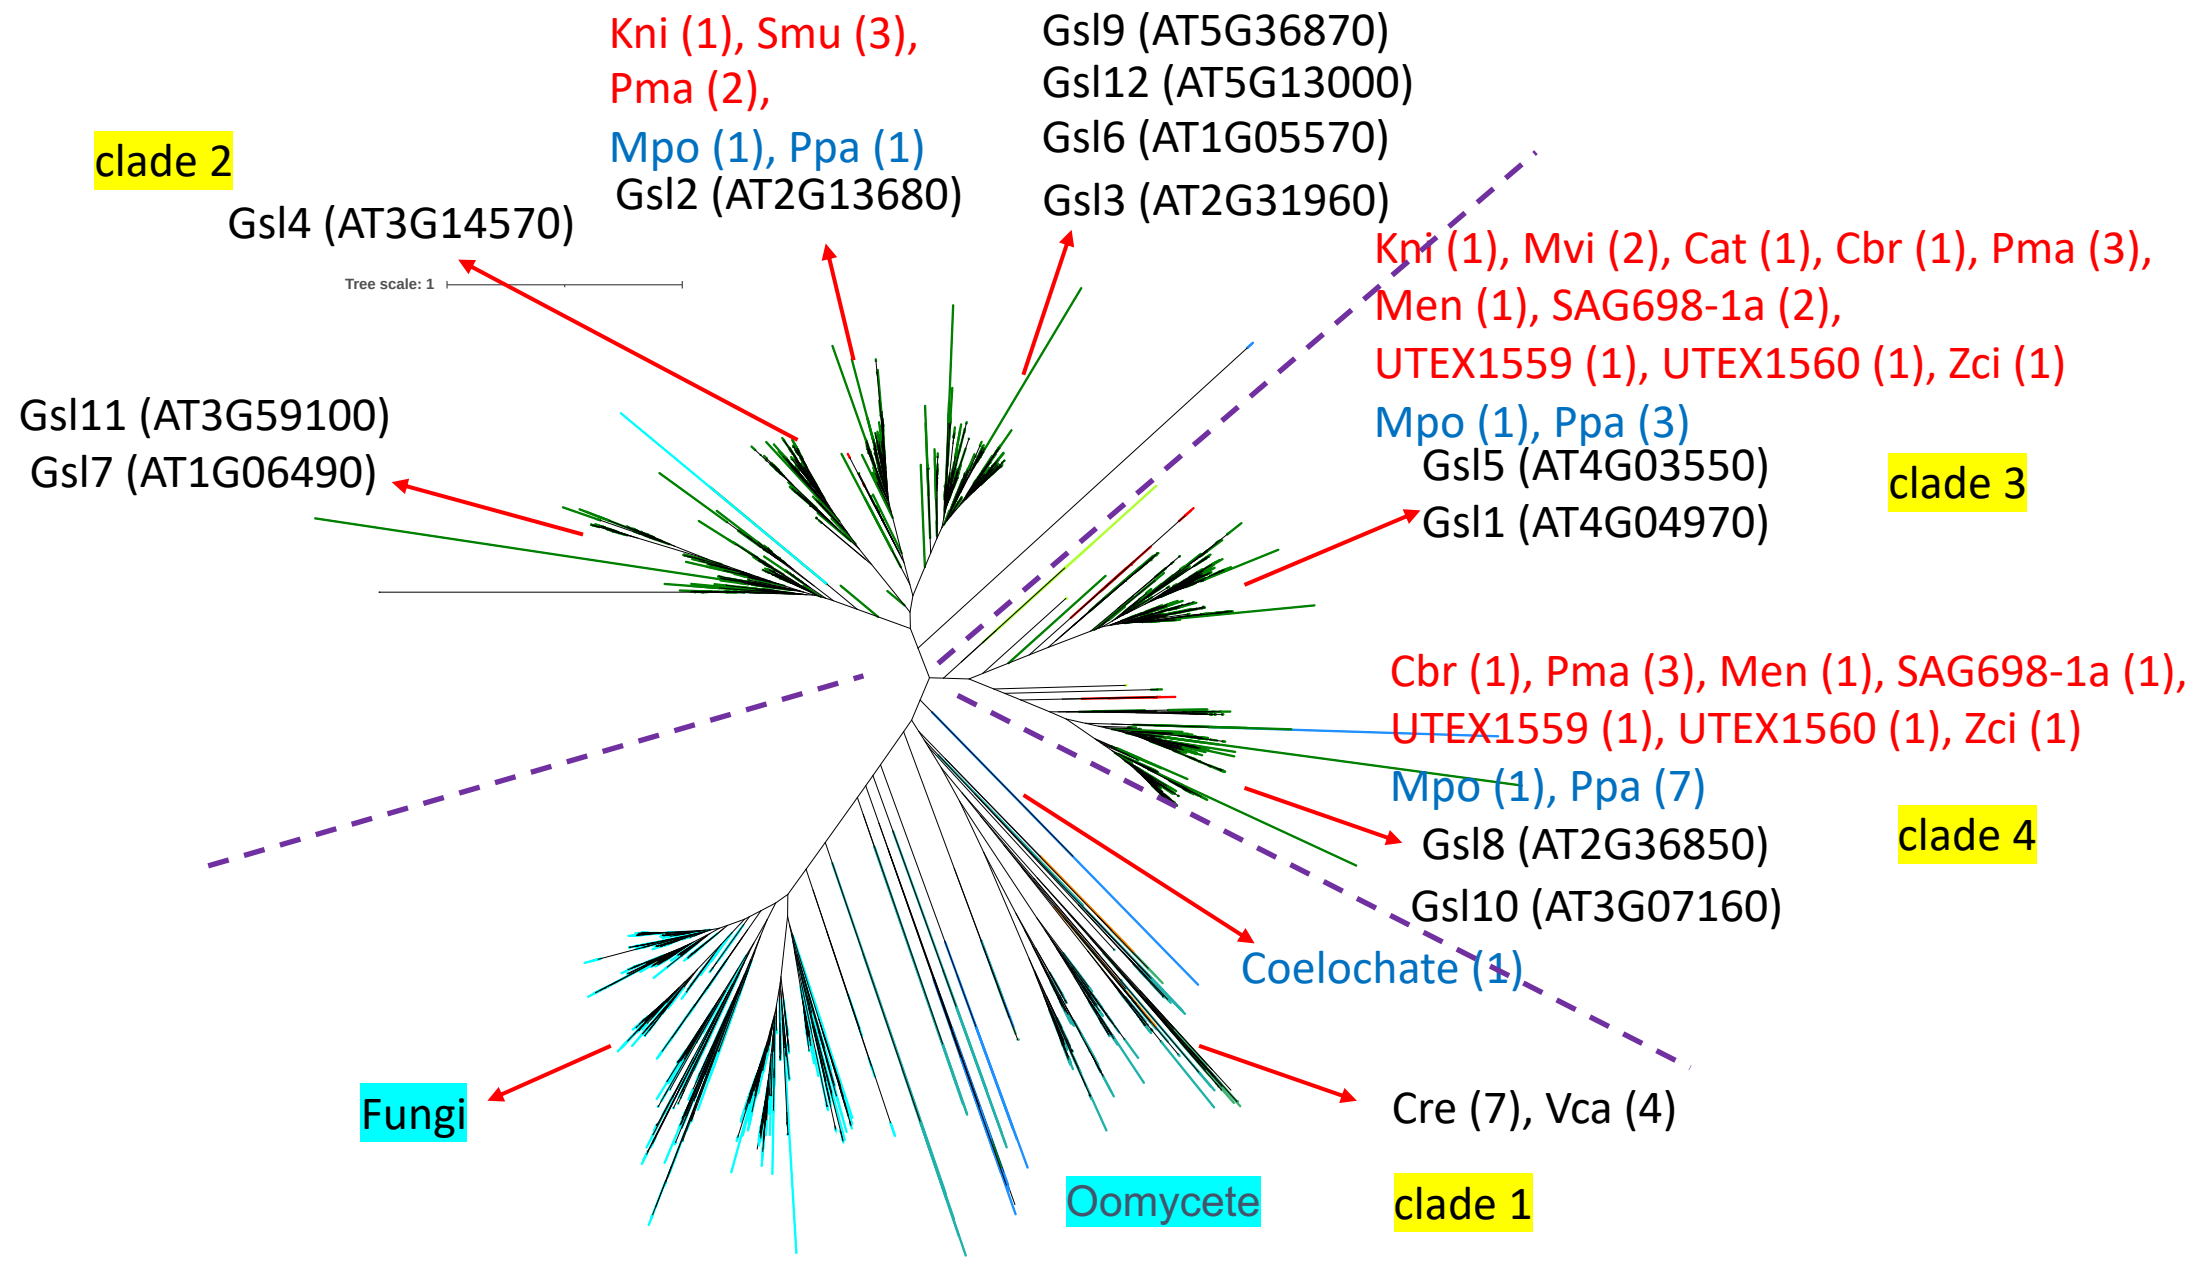

# GH17

gamma

BG2  
(AT3G57260)

beta

alpha

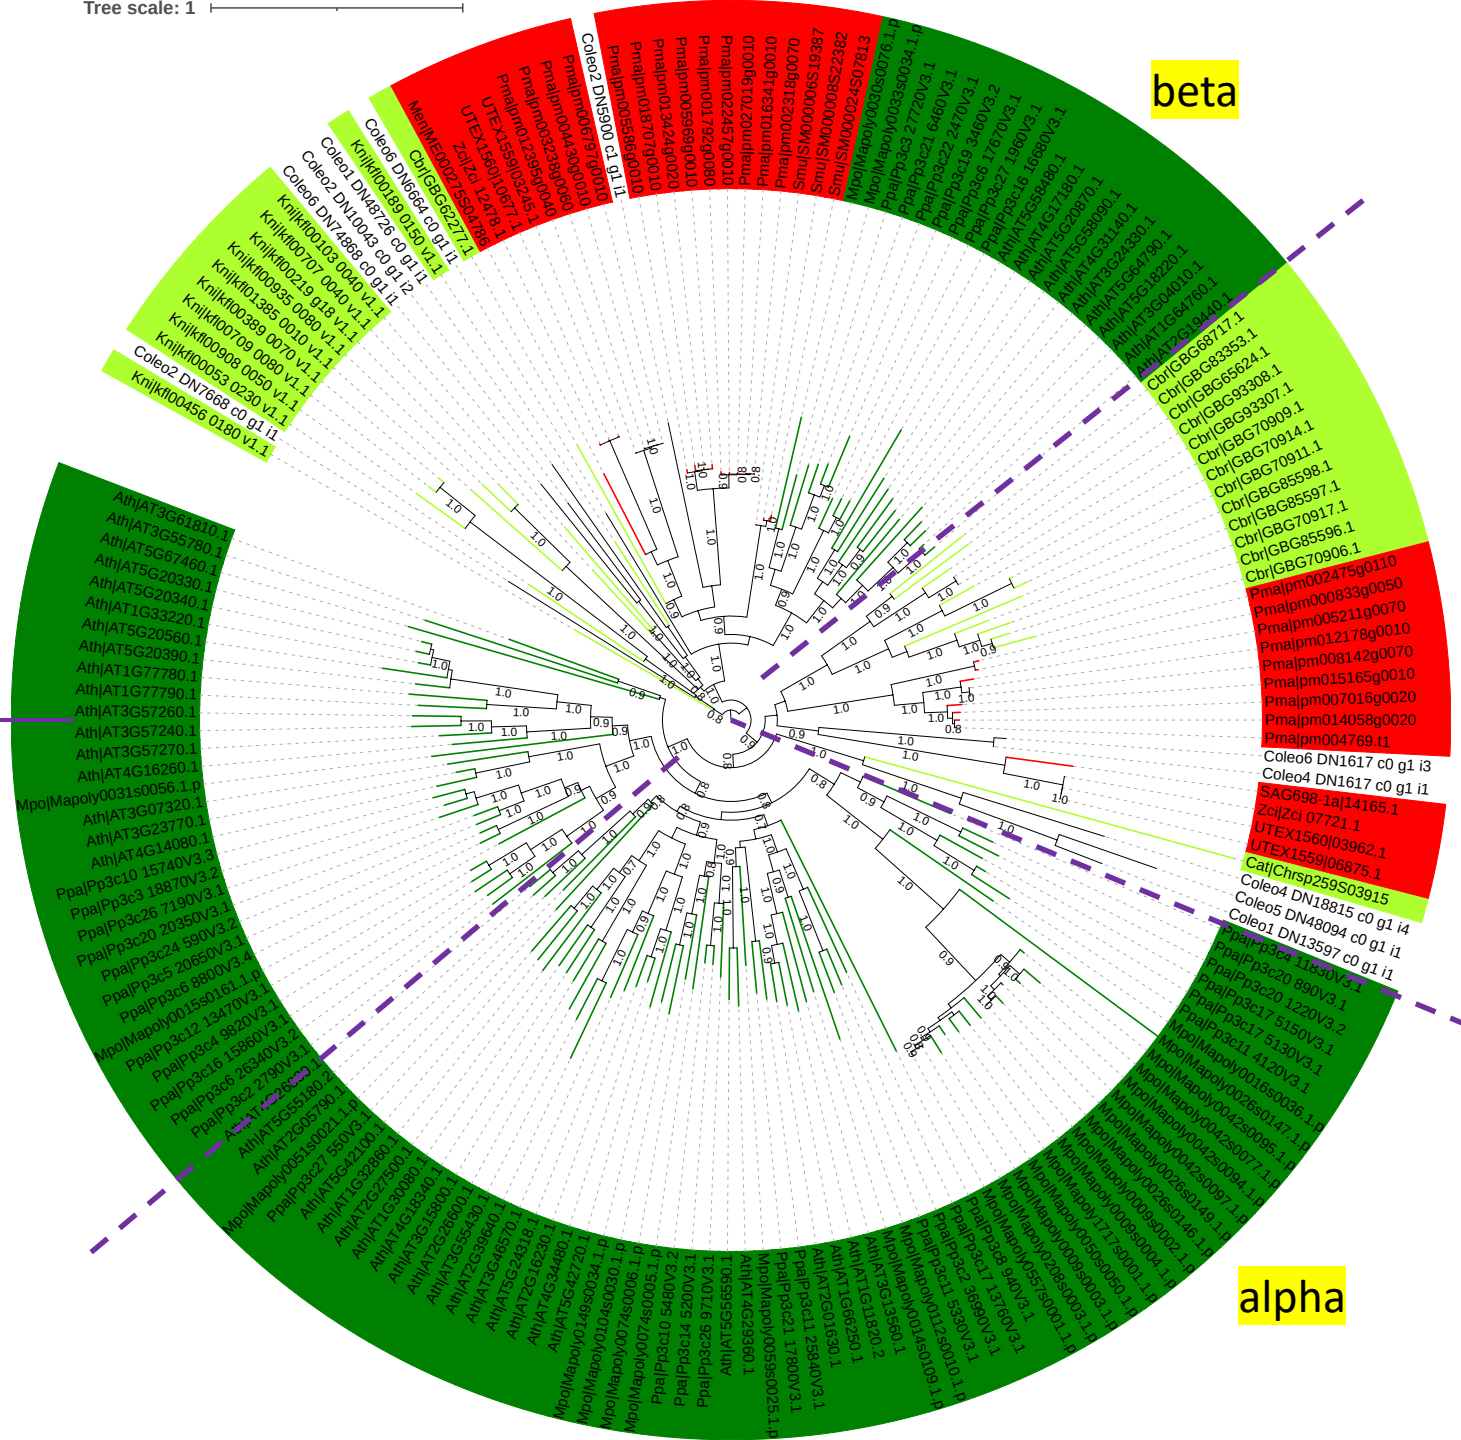

PMID: [24904609](https://pubmed.ncbi.nlm.nih.gov/24904609/)

| class  | Cre | Vca | Mvi | Cat | Kni | Cbr | Smu | Pma | Men | 1a | UTEX1559 | UTEX1560 | 1b | Mpo | Ppa | Ath |
|--------|-----|-----|-----|-----|-----|-----|-----|-----|-----|----|----------|----------|----|-----|-----|-----|
| GH5_14 | 0   | 0   | 0   | 0   | 0   | 0   | 11  | 18  | 14  | 11 | 8        | 9        | 9  | 3   | 2   | 0   |

**Data S1-29**

**exo-b-1,3-glucanase (EC 3.2.1.58)**

<https://itol.embl.de/tree/13423816417184651661223495>

AT3G26130: e-value is low 9.1e-06

**GH5\_14 hmm**

Zhou Y, Zeng L, Gui J, Liao Y, Li J, Tang J, Meng Q, Dong F, Yang Z. Functional characterizations of  $\beta$ -glucosidases involved in aroma compound formation in tea (*Camellia sinensis*). *Food Res Int.* 2017 Jun;96:206-214. doi: 10.1016/j.foodres.2017.03.049.

Opassiri R, Pomthong B, Akiyama T, Nakphaichit M, Onkoksoong T, Ketudat Cairns M, Ketudat Cairns JR. A stress-induced rice (*Oryza sativa* L.) beta-glucosidase represents a new subfamily of glycosyl hydrolase family 5 containing a fascin-like domain. *Biochem J.* 2007 Dec 1;408(2):241-9. doi: 10.1042/BJ20070734.

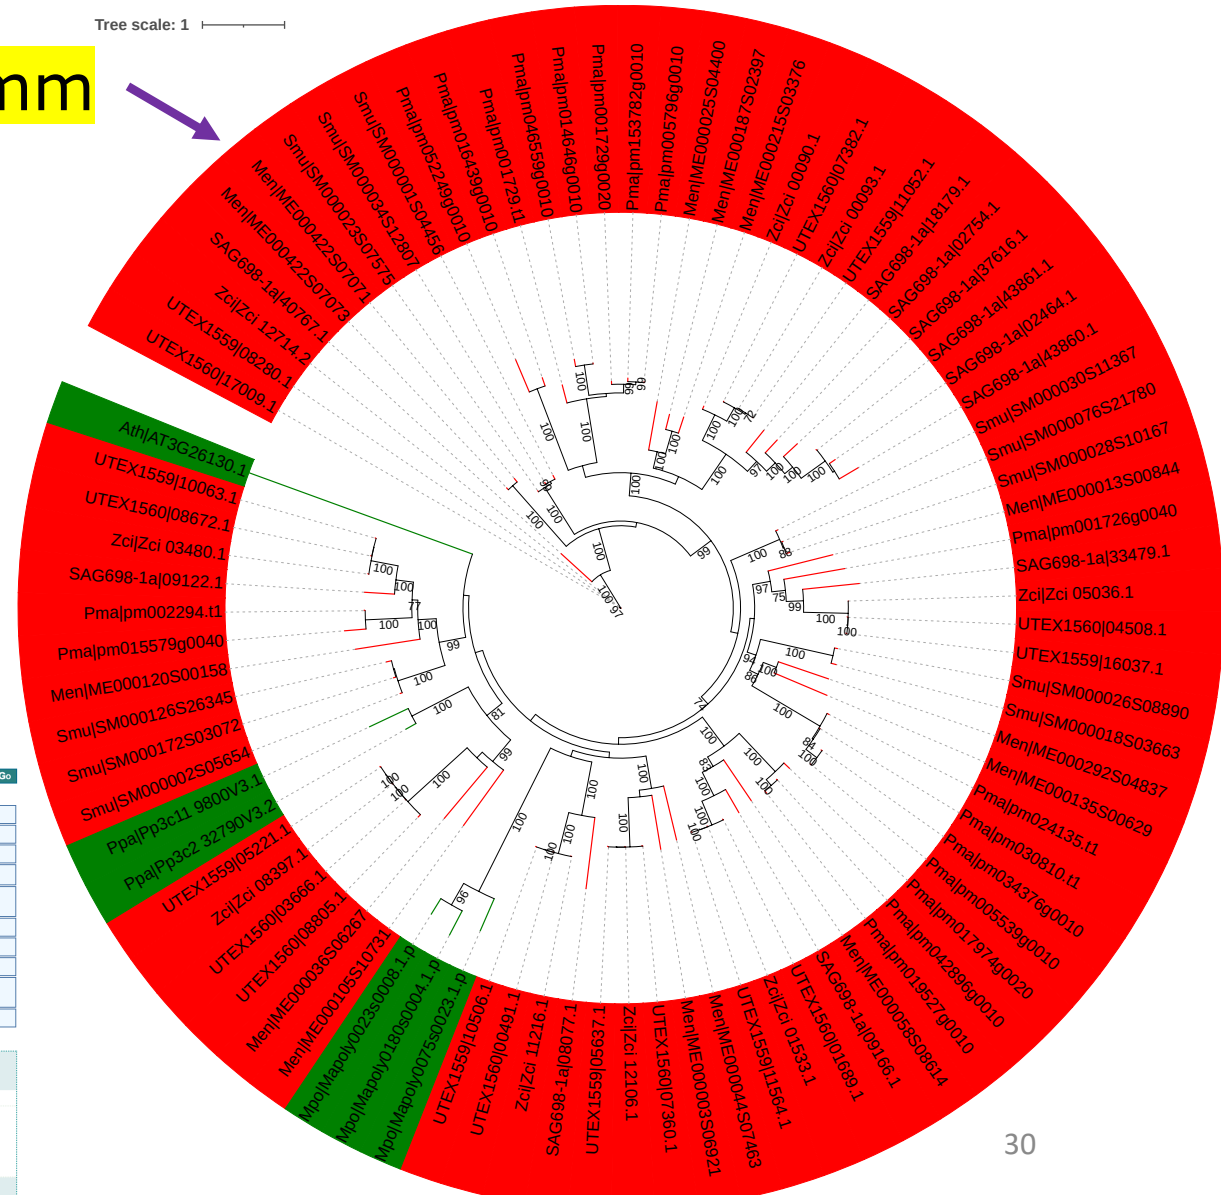

**Glycoside Hydrolase Family 5 / Subf 14**

GH5 Go GH5\_14 Go Family Go

|                                      |                                                                                                                                                                           |  |  |  |  |
|--------------------------------------|---------------------------------------------------------------------------------------------------------------------------------------------------------------------------|--|--|--|--|
| <b>Activities in Sub Family</b>      | b-glucosidase (EC 3.2.1.21);exo-b-1,3-glucanase (EC 3.2.1.58)                                                                                                             |  |  |  |  |
| <b>Mechanism</b>                     | Retaining                                                                                                                                                                 |  |  |  |  |
| <b>Clan</b>                          | GH-A                                                                                                                                                                      |  |  |  |  |
| <b>3D Structure Status</b>           | ( $\beta$ / $\alpha$ ) $\beta$ barrel                                                                                                                                     |  |  |  |  |
| <b>Catalytic Nucleophile/Base</b>    | Glu (experimental)                                                                                                                                                        |  |  |  |  |
| <b>Catalytic Proton Donor</b>        | Glu (experimental)                                                                                                                                                        |  |  |  |  |
| <b>Note</b>                          | Once known as cellulase family A; many members have been assigned to subfamilies as described by Aspeborg et al. (2012) <i>BMC Evol Biol.</i> 12(1):186 (PMID: 22992189). |  |  |  |  |
| <b>External resources</b>            | CAZypedia; HOMSTRAD; PROSITE;                                                                                                                                             |  |  |  |  |
| <b>Commercial Enzyme Provider(s)</b> | MEGAZYME; NZYTech; PROZOMIX;                                                                                                                                              |  |  |  |  |
| <b>Statistics</b>                    | GenBank accession (103); Uniprot accession (3);                                                                                                                           |  |  |  |  |
| <b>Summary</b>                       | Download GH5_14 (83) Taxonomic dislay Characterized (2)                                                                                                                   |  |  |  |  |

| Eukaryota                                           |          |           |                                    |                                                                                  |                  |        |      |
|-----------------------------------------------------|----------|-----------|------------------------------------|----------------------------------------------------------------------------------|------------------|--------|------|
| Protein Name                                        | EC#      | Reference | Organism                           | GenBank                                                                          | Uniprot          | PDB/3D | Subf |
| $\beta$ -glucosidase 1 GH5 family (GH5BG1;C5GH5BG1) | 3.2.1.21 | pubmed    | <i>Camellia sinensis</i>           | ARU79086.1                                                                       | A0A1Y0K2D4       |        | 14   |
| exo- $\beta$ -1,3-glucosidase (GH5BG;Os10g0370500)  | 3.2.1.58 | pubmed    | <i>Oryza sativa Japonica Group</i> | AAM08614.1<br>AAM08821.1<br>AAP53379.1<br>BAF76372.1<br>BAG89316.1<br>BAT10560.1 | Q01Y43<br>Q8RU06 |        | 14   |

GH5\_14 nr  
e-15

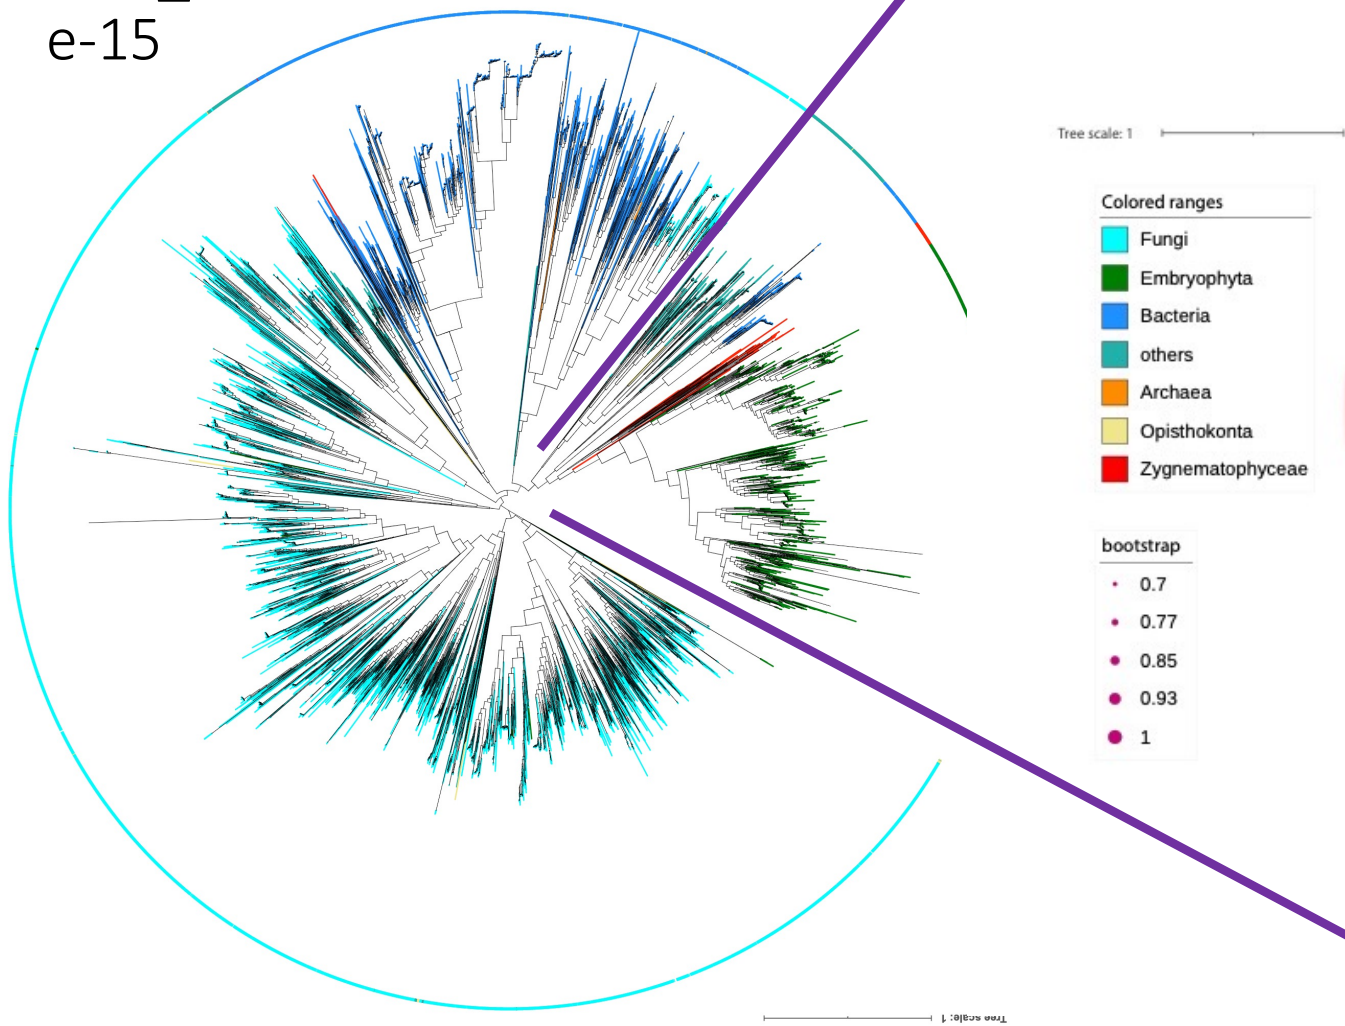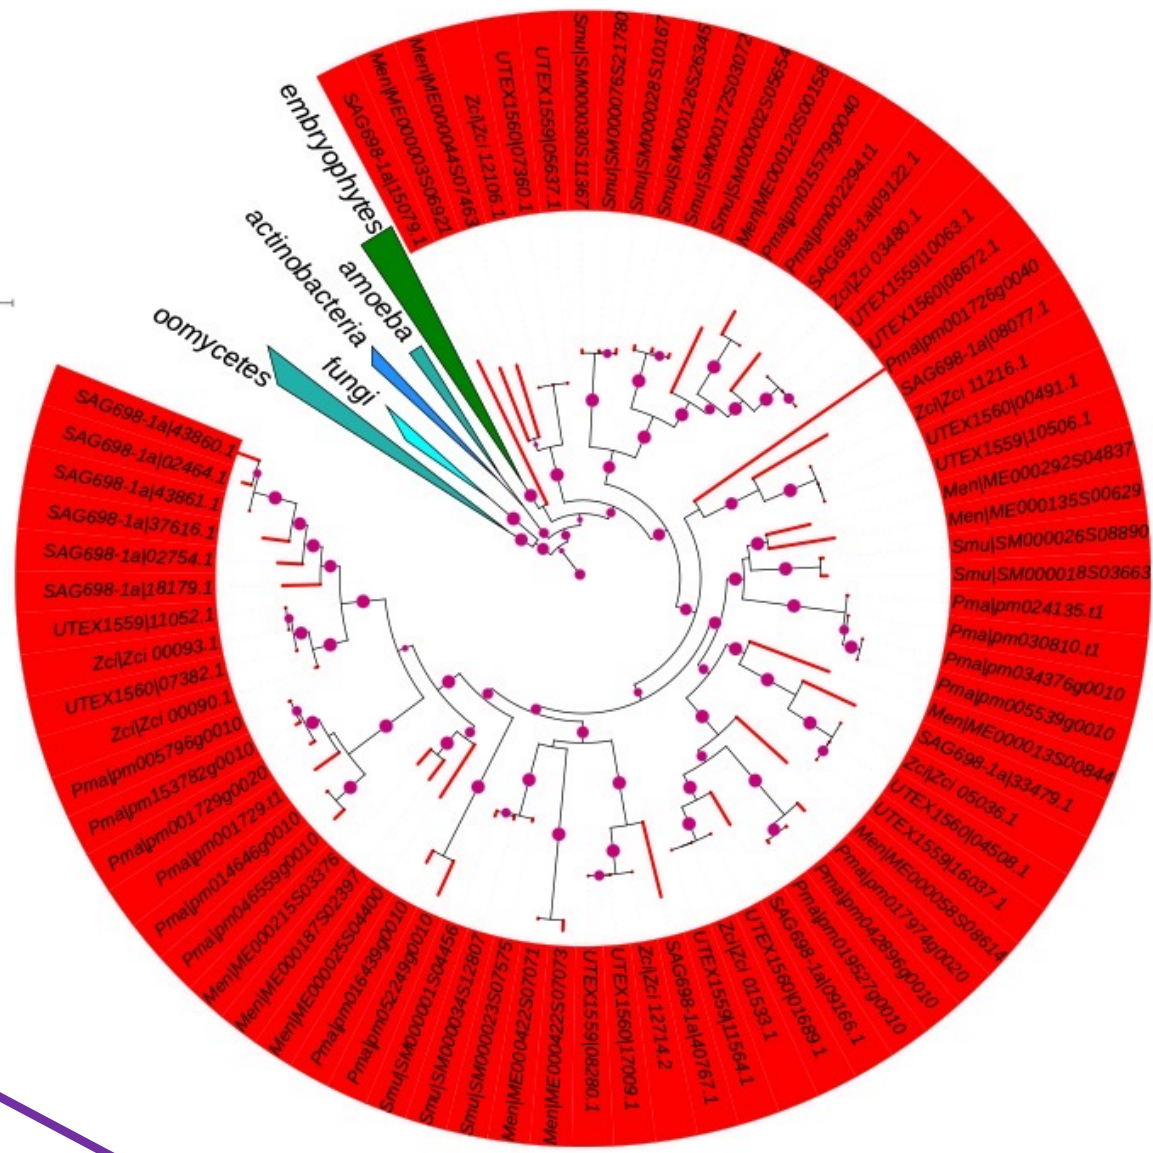

Possible gain via HGT from bacteria

# The combination of Fascin domain and GH5\_14 is first present in Zygnematophyceae

Conserved domains on [gi|19920182|gb|AAM08614.]

View Standard Results

Putative Glucan 1,3-beta-glucosidase precursor [Oryza sativa Japonica Group]

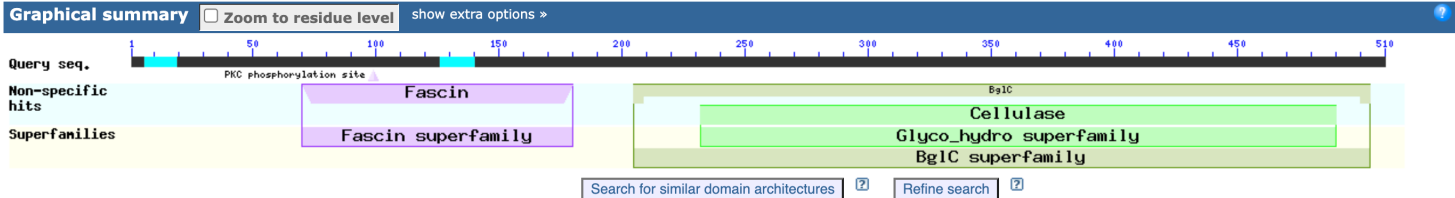

rice GH5BG (Fascin domain)

List of domain hits

| Name          | Accession | Description                                                                               | Interval | E-value  |
|---------------|-----------|-------------------------------------------------------------------------------------------|----------|----------|
| [+] BglC      | COG2730   | Aryl-phospho-beta-D-glucosidase BglC, GH1 family [Carbohydrate transport and metabolism]; | 205-504  | 2.41e-29 |
| [+] Cellulase | pfam00150 | Cellulase (glycosyl hydrolase family 5);                                                  | 232-490  | 8.40e-14 |
| [-] Fascin    | cd00257   | Fascin-like domain; members include actin-bundling/crosslinking proteins fascin, ...      | 70-180   | 3.74e-03 |

Fascin-like domain; members include actin-bundling/crosslinking proteins fascin, histactophilin and singed; identified in sea urchin, Drosophila, Xenopus, rodents, and humans; The fascin-like domain adopts a beta-trefoil topology and contains an internal threefold repeat; the fascin subgroup contains four copies of the domain; Structurally similar to fibroblast growth factor (FGF)

Pssm-ID: 238160 Cd Length: 119 Bit Score: 37.25 E-value: 3.74e-03

```

gi 19920182 70  TQLQFKSVTONmYLCARQGGTILVANRTSASGWETFKLWRIDEDTFDLRVFDNLFVTVAGDGVTVVATvaSPGGEAFQ 149
Cdd:cd00257 2  PQVVLRSVNGR-YLSEAAGGK-VDANRDSLKGDFTTLEFDNTGKYALRSHDGKYLSDSDGGVQLEG--HPNADCRFT 77

gi 19920182 150 IVRNGDKTRARIRAPNGMFLQAKTSDSVTAD 180
Cdd:cd00257 78 LEFHGD-GKVALRAENGRYLGDDSGTLKAS 107

```

Conserved domains on [lcl|Query\_8185]

View Standard Results

Local query sequence

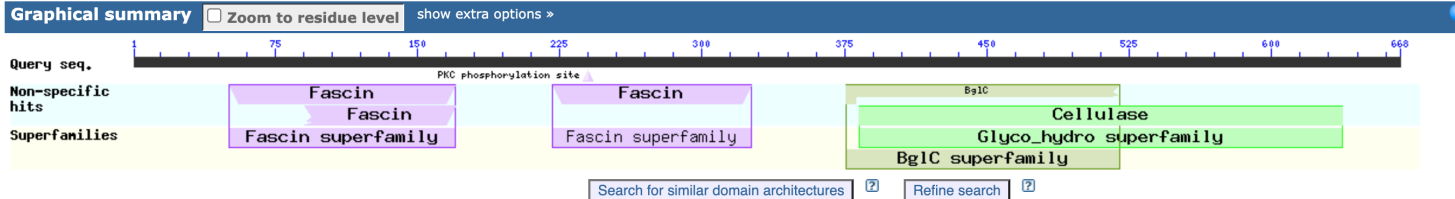

Zci|Zci\_03480.1 (Fascin domain)

List of domain hits

| Name          | Accession | Description                                                                                  | Interval | E-value  |
|---------------|-----------|----------------------------------------------------------------------------------------------|----------|----------|
| [+] BglC      | COG2730   | Aryl-phospho-beta-D-glucosidase BglC, GH1 family [Carbohydrate transport and metabolism];    | 376-520  | 7.10e-17 |
| [+] Cellulase | pfam00150 | Cellulase (glycosyl hydrolase family 5);                                                     | 383-637  | 2.23e-09 |
| [+] Fascin    | cd00257   | Fascin-like domain; members include actin-bundling/crosslinking proteins fascin, ...         | 221-326  | 2.79e-09 |
| [+] Fascin    | pfam06268 | Fascin domain; This family consists of several eukaryotic fascin or singed proteins. The ... | 51-170   | 1.19e-06 |
| [-] Fascin    | cd00257   | Fascin-like domain; members include actin-bundling/crosslinking proteins fascin, ...         | 91-170   | 4.00e-06 |

Fascin-like domain; members include actin-bundling/crosslinking proteins fascin, histactophilin and singed; identified in sea urchin, Drosophila, Xenopus, rodents, and humans; The fascin-like domain adopts a beta-trefoil topology and contains an internal threefold repeat; the fascin subgroup contains four copies of the domain; Structurally similar to fibroblast growth factor (FGF)

Pssm-ID: 238160 Cd Length: 119 Bit Score: 46.11 E-value: 4.00e-06

```

Query_8185 91  VAFRGPNGKLLAAHADATVTSASGEASgtdipTECMFRVEKKPNKFTIWSVANSYLLRAWNDGTLRLHMKAPTSELEFSI 170
Cdd:cd00257 46  YALRSHDGKYLSDSDGGVQLEGHPN----ADCRFTLEFHGDGKWALRAE-NGRYLGDDSGTLKASSETVGPDELPEL 119

```



# Xylan / AX / GX / GAX

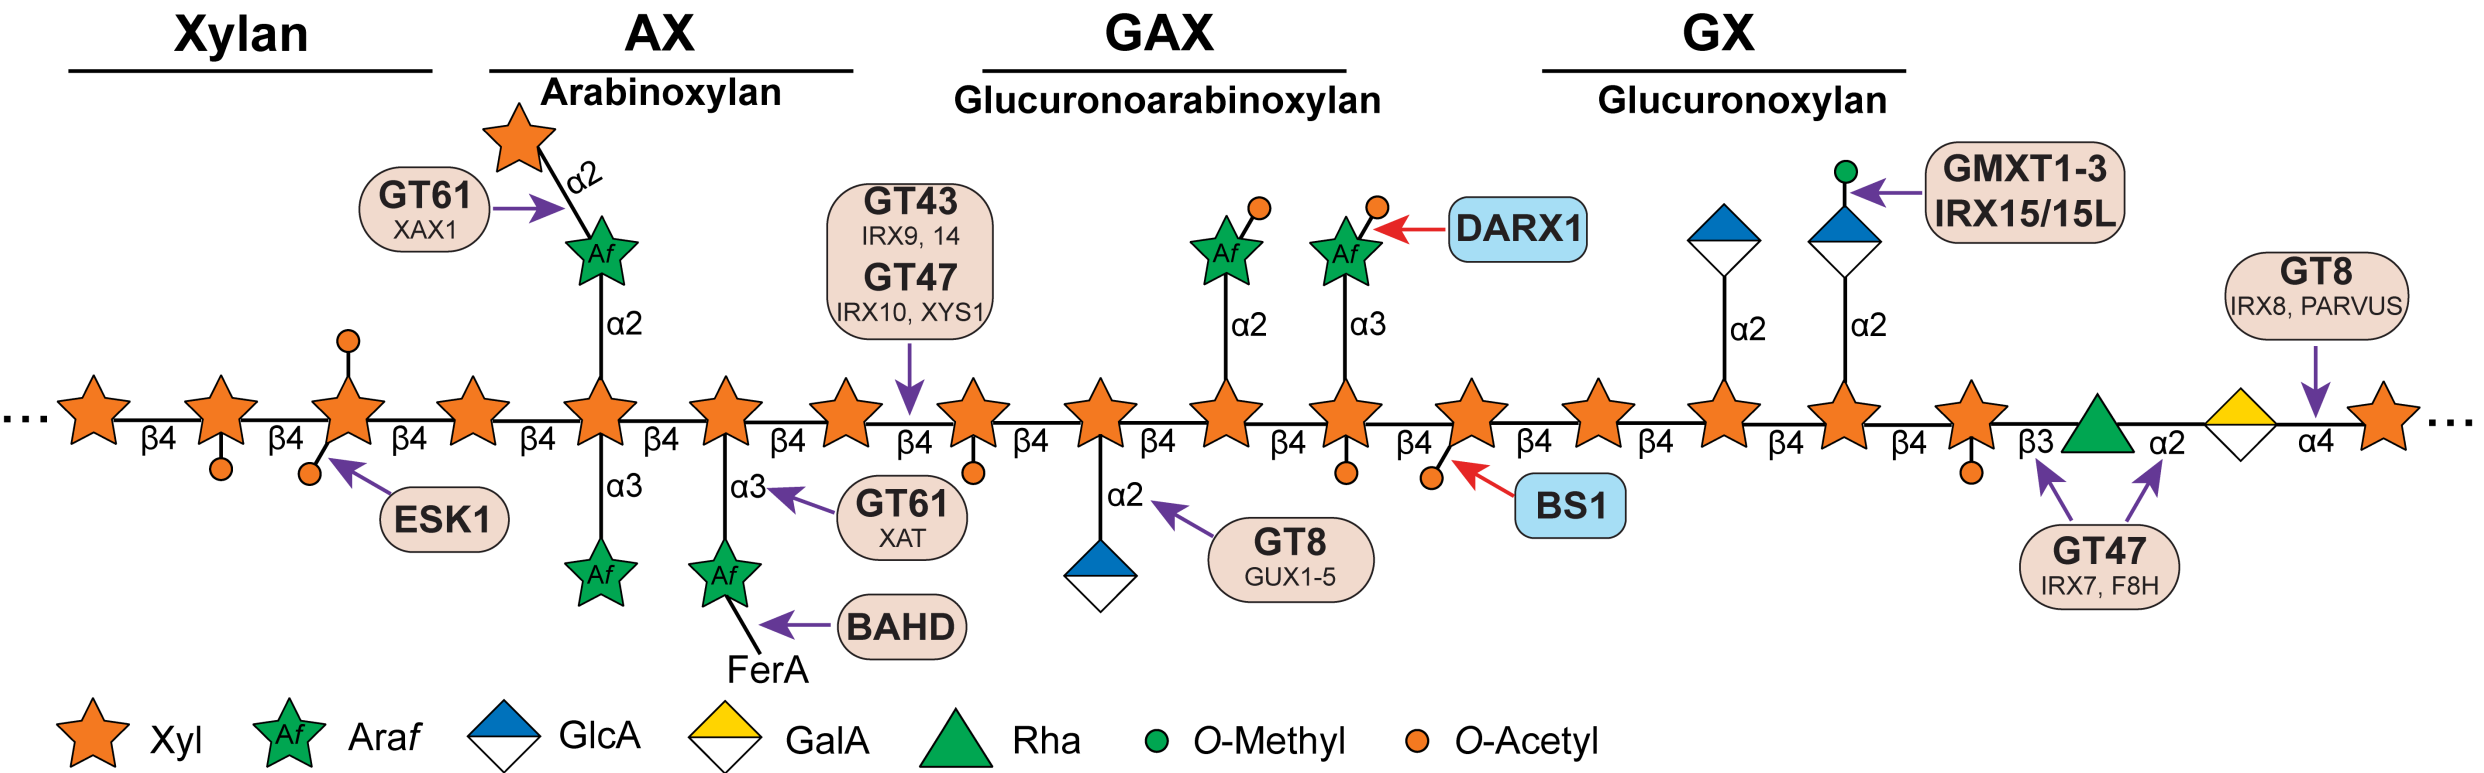

## Data S1-33

Madson M, Dunand C, Li X, Verma R, Vanzin GF, Caplan J, Shoue DA, Carpita NC, Reiter WD. The MUR3 gene of Arabidopsis encodes a xyloglucan galactosyltransferase that is evolutionarily related to animal exostosins. *Plant Cell*. 2003 Jul;15(7):1662-70. doi: 10.1105/tpc.009837.

## MUR3 (AT2G20370)

## XLT2 (AT5G62220)

## XUT1 (AT1G63450)

## Coleochaete scutate Coleochaete orbicularis

Jensen JK, Schultink A, Keegstra K, Wilkerson CG, Pauly M. RNA-Seq analysis of developing nasturtium seeds (*Tropaeolum majus*): identification and characterization of an additional galactosyltransferase involved in xyloglucan biosynthesis. *Mol Plant*. 2012 Sep;5(5):984-92. doi: 10.1093/mp/sss032.

Peña MJ, Kong Y, York WS, O'Neill MA. A galacturonic acid-containing xyloglucan is involved in Arabidopsis root hair tip growth. *Plant Cell*. 2012 Nov;24(11):4511-24. doi: 10.1105/tpc.112.103390.

Tree scale: 1

## XyG

Møller et al. Identification and evolution of a plant cell wall specific glycoprotein glycosyl transferase, ExAD. *Sci Rep*. 2017 Mar 30;7:45341. doi: 10.1038/srep45341

# GT47

## ExAD (AT3G57630)

## Extensin Arabinose Deficient transferase

Lee C, Teng Q, Huang W, Zhong R, Ye ZH. The F8H glycosyltransferase is a functional paralog of FRA8 involved in glucuronoxylan biosynthesis in Arabidopsis. *Plant Cell Physiol*. 2009 Apr;50(4):812-27. doi: 10.1093/pcp/pcp025. Epub 2009 Feb 18. PMID: 19224953.

Brown, D.M., Goubet, F., Wong, V.W., Goodacre, R., Stephens, E., Dupree, P., and Turner, S.R. (2007). Comparison of five xylan synthesis mutants reveals new insight into the mechanisms of xylan synthesis. *Plant J*. 52: 1154–1168.

## F8H (AT5G22940)

## IRX7/FRA8 (AT2G28110)

## NpGUT1: pectin b-glucuronyltransferase transferring glucuronic acid to RG-II

Urbanowicz BR, Peña MJ, Moniz HA, Moremen KW, York WS. 2014. Two Arabidopsis proteins synthesize acetylated xylan in vitro. *Plant Journal* 80: 197–206.

Jensen JK, Busse-Wicher M, Poulsen CP, Fangel JU, Smith PJ, Yang JY, Peña MJ, Dinesen MH, Martens HJ, Melkonian M et al. 2018. Identification of an algal xylan synthase indicates that there is functional orthology between algal and plant cell wall biosynthesis. *New Phytologist* 218: 1049–1060.

## XYS1/IRX10-L (AT5G61840) IRX10 (AT1G27440)

## Xylan

Jensen et al. Identification of a xylogalacturonan xylosyltransferase involved in pectin biosynthesis in Arabidopsis. *Plant Cell*. 2008 May;20(5):1289-302. doi: 10.1105/tpc.107.050906

## XGD1 (AT5G33290)

## XGA

Iwai H, Masaoka N, Ishii T, Satoh S. A pectin glucuronyltransferase gene is essential for intercellular attachment in the plant meristem. *Proc Natl Acad Sci U S A*. 2002 Dec 10;99(25):16319-24. doi: 10.1073/pnas.252530499.

## ARAD2 (AT5G44930) ARAD1 (AT2G35100)

## RG-I

Harholt et al. ARABINAN DEFICIENT 1 is a putative arabinosyltransferase involved in biosynthesis of pectic arabinan in Arabidopsis. *Plant Physiol*. 2006 Jan;140(1):49-58. doi: 10.1104/pp.105.072744.

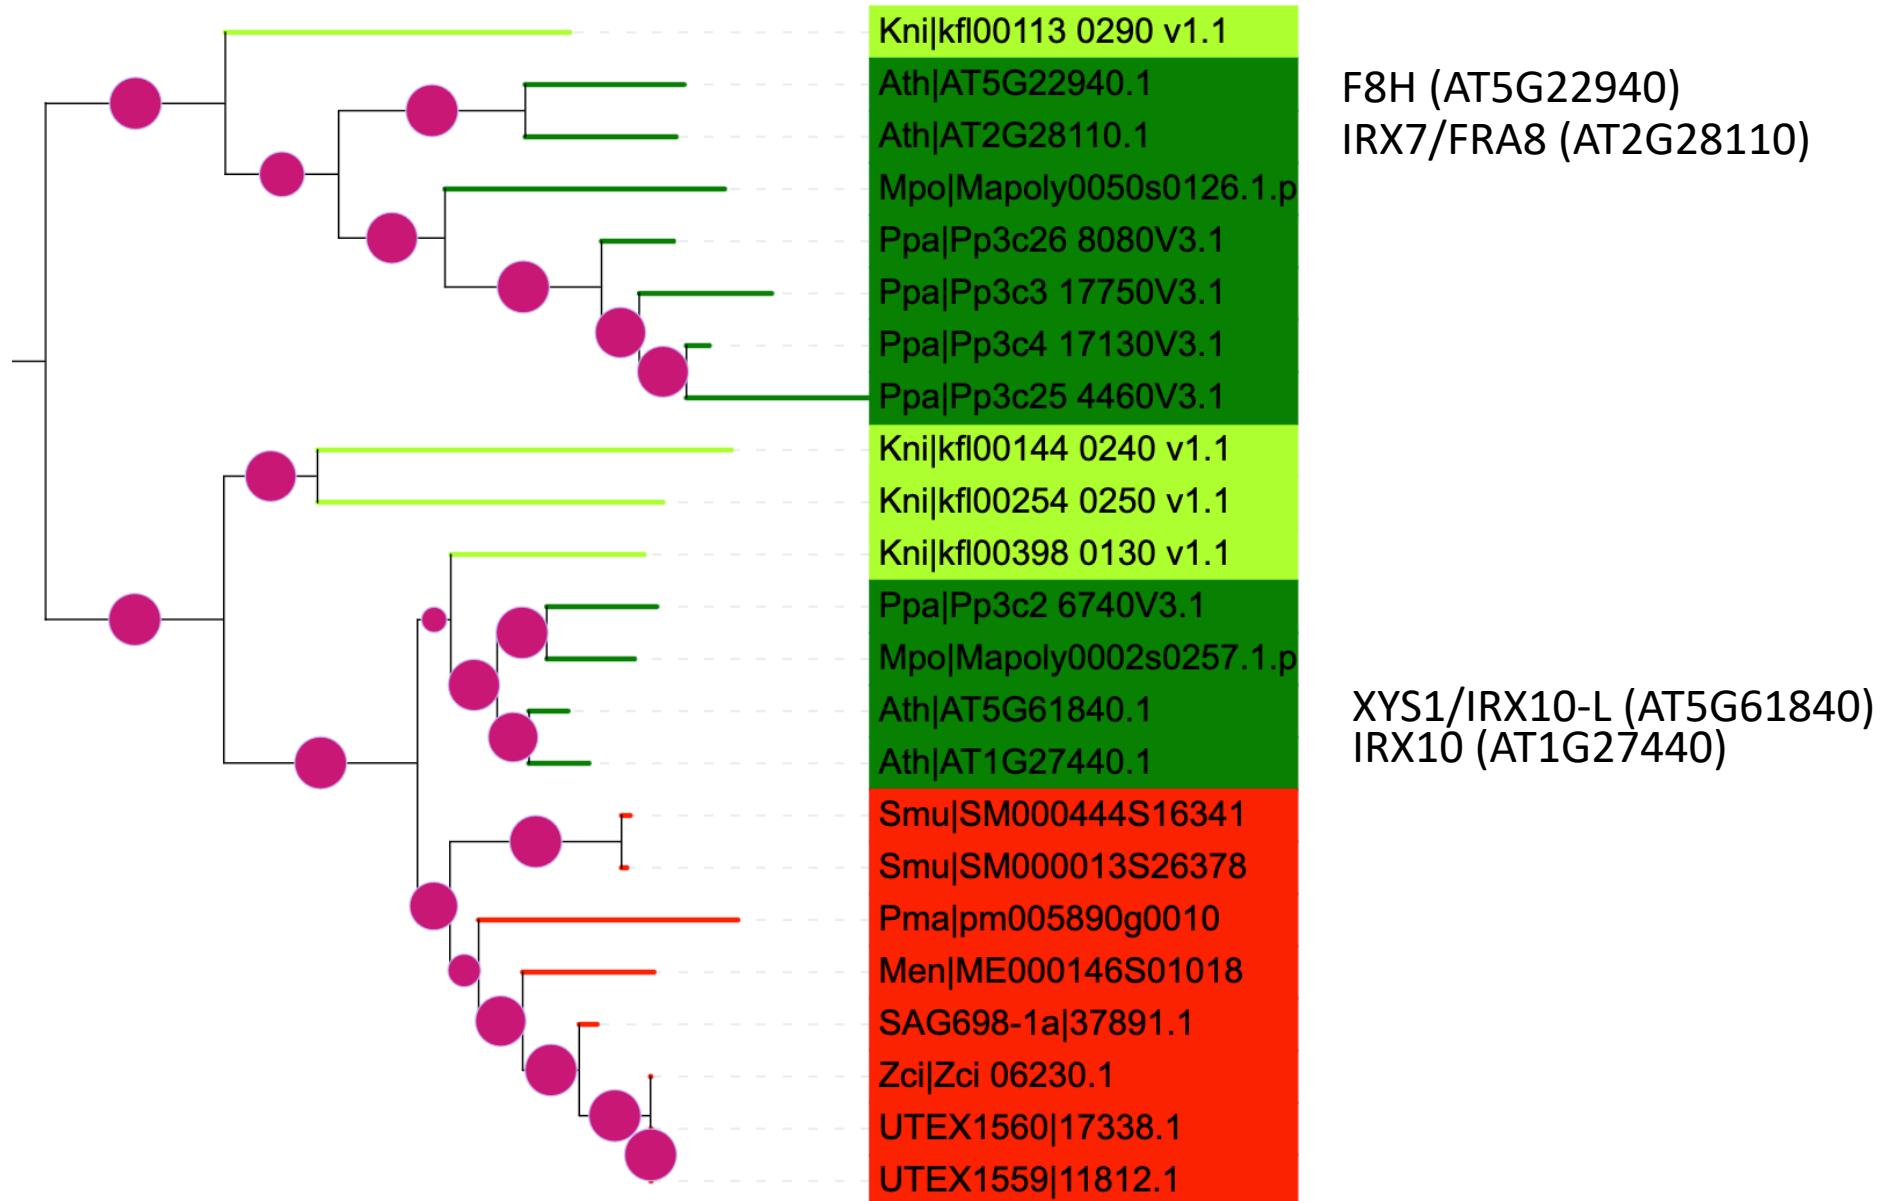

GT47

**glucuronoxylan glycosyltransferase**

secondary wall  
thickening in fibers

IRX14-L (AT5G67230)

IRX14 (AT4G36890)

Brown, D.M., Goubet, F., Wong, V.W., Goodacre, R., Stephens, E., Dupree, P., and Turner, S.R. (2007). Comparison of five xylan synthesis mutants reveals new insight into the mechanisms of xylan synthesis. *Plant J.* 52: 1154–1168.

Lee C, Teng Q, Huang W, Zhong R, Ye ZH. The Arabidopsis family GT43 glycosyltransferases form two functionally nonredundant groups essential for the elongation of glucuronoxylan backbone. *Plant Physiol.* 2010 Jun;153(2):526-41. doi: 10.1104/pp.110.155309.

Ren Y, Hansen SF, Ebert B, Lau J, Scheller HV. Site-directed mutagenesis of IRX9, IRX9L and IRX14 proteins involved in xylan biosynthesis: glycosyltransferase activity is not required for IRX9 function in Arabidopsis. *PLoS One.* 2014 Aug 13;9(8):e105014. doi: 10.1371/journal.pone.0105014.

**GT43**

**xylan β-1,4-xylosyltransferase**

IRX9 (AT4G37090)

IRX9-L (AT1G27600)

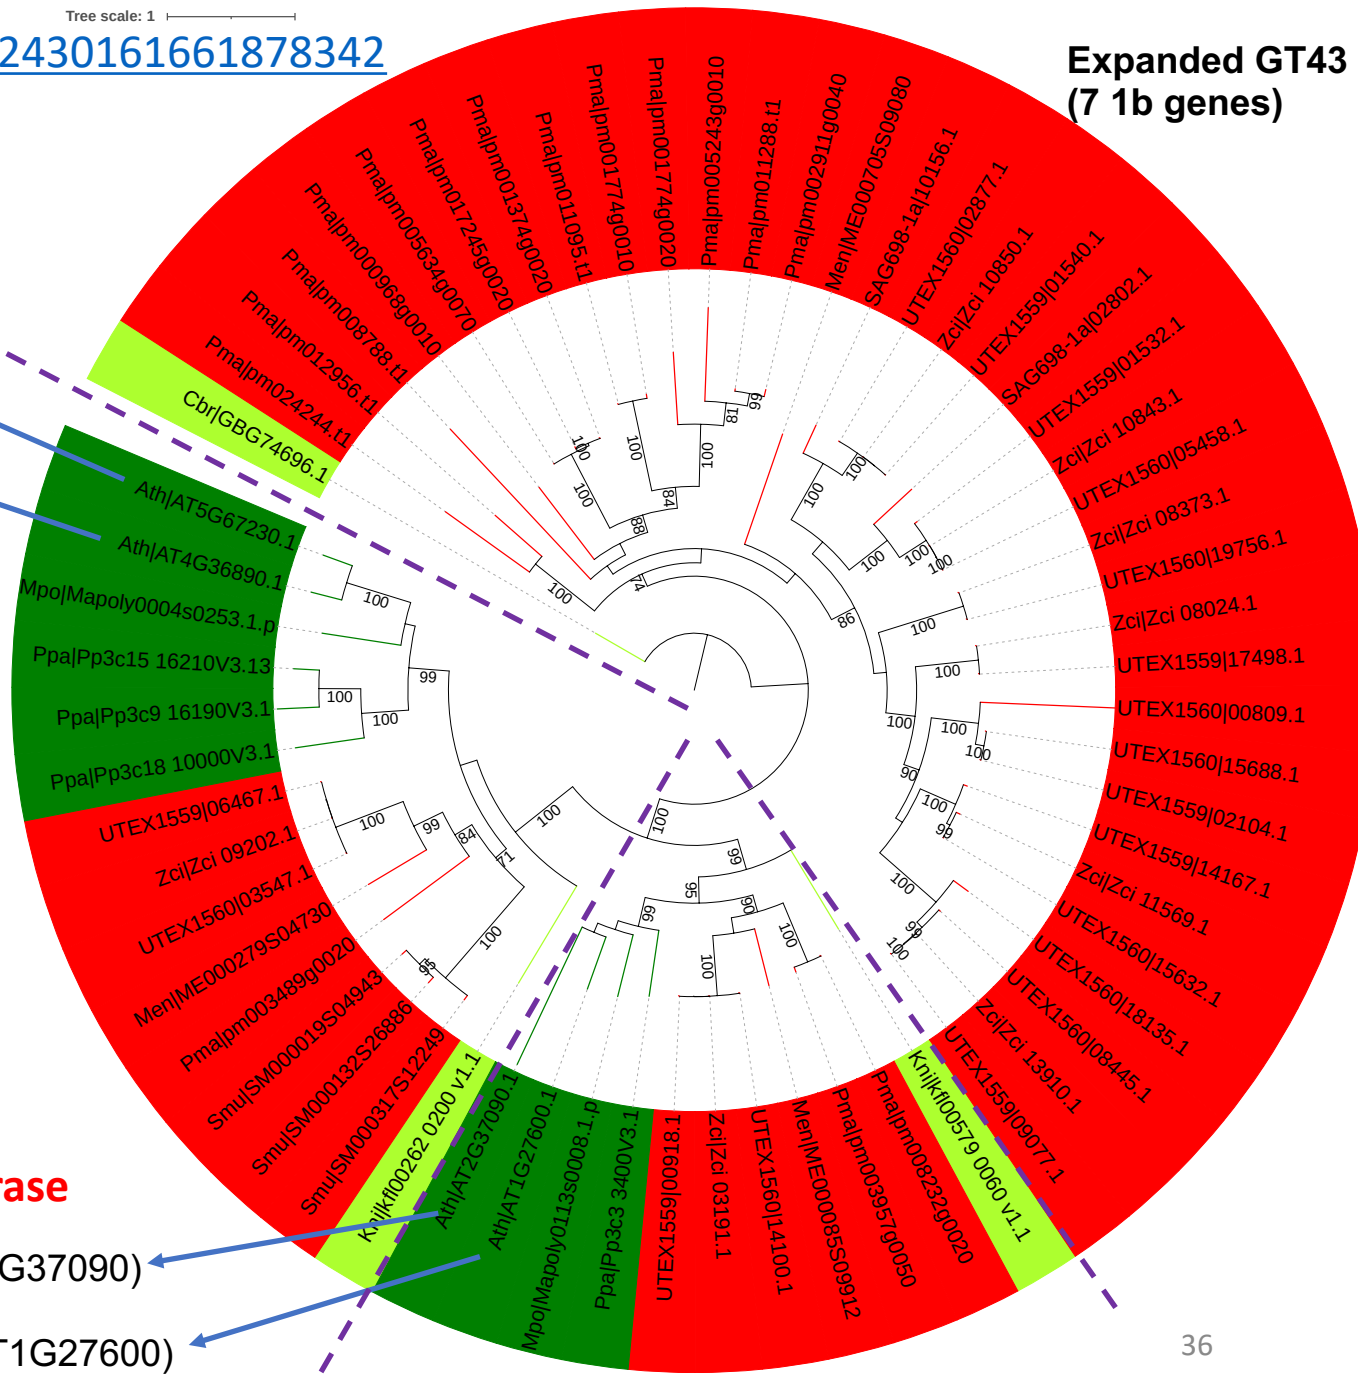

$\beta$ -1,3-glucuronyltransferase

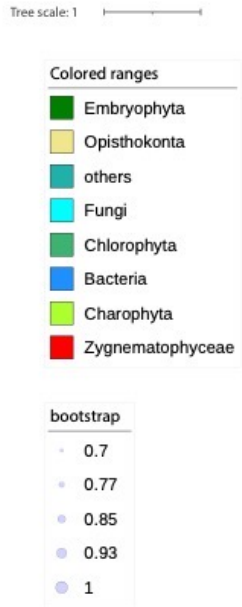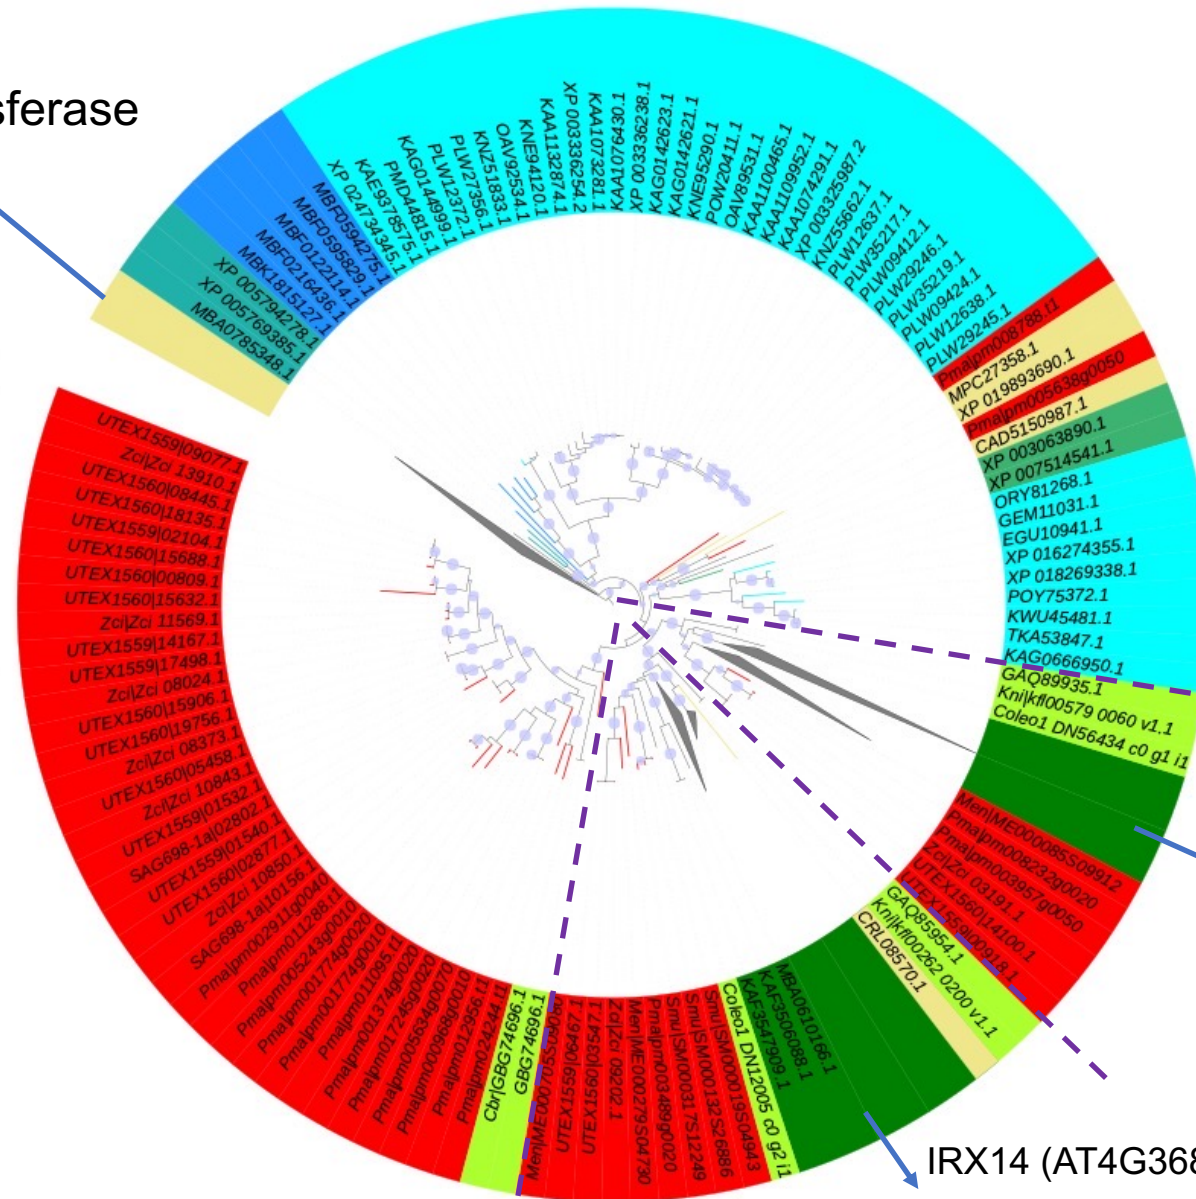

Rhodotorula  
fungi

IRX9-L (AT1G27600)  
IRX9 (AT4G37090)

IRX14 (AT4G36890)  
IRX14-L (AT5G67230)

GT43 nr

HGT with fungi

# GT8 (dbcan) + Coleochaete

- GAUT6 (AT1G06780)
- GAUT5 (AT2G30575)
- GAUT7** (AT2G38650)
- GAUT4 (AT5G47780)
- GAUT1** (AT3G61130)
- GAUT2 (AT2G46480)
- GAUT3 (AT4G38270)

- GAUT8** (AT3G25140)
- GAUT9 (AT3G02350)

- GAUT10 (AT2G20810)
- GAUT11 (AT1G18580)

- GAUT14 (AT5G15470)
- GAUT13 (AT3G01040)
- GAUT15 (AT3G58790)
- GAUT12 (AT5G54690) (**IRX8: Xylan**)

- GUX1 (AT3G18660)
- GUX3 (AT1G77130)
- GUX2 (AT4G33330)
- GUX4 (AT1G54940)
- GUX5 (AT1G08990)

Rennie EA, Hansen SF, Baidoo EEK, Hadi MZ, Keasling JD, Scheller HV. 2012. Three members of the Arabidopsis glycosyltransferase family 8 are xylan glucuronosyltransferases. *Plant Physiology* 159: 1408–1417.

**GOLS**

(**PARVUS\_GATL: Xylan**)

- GATL1-10
- GATL1 (AT1G19300)
- galacturonosyltransferase-like

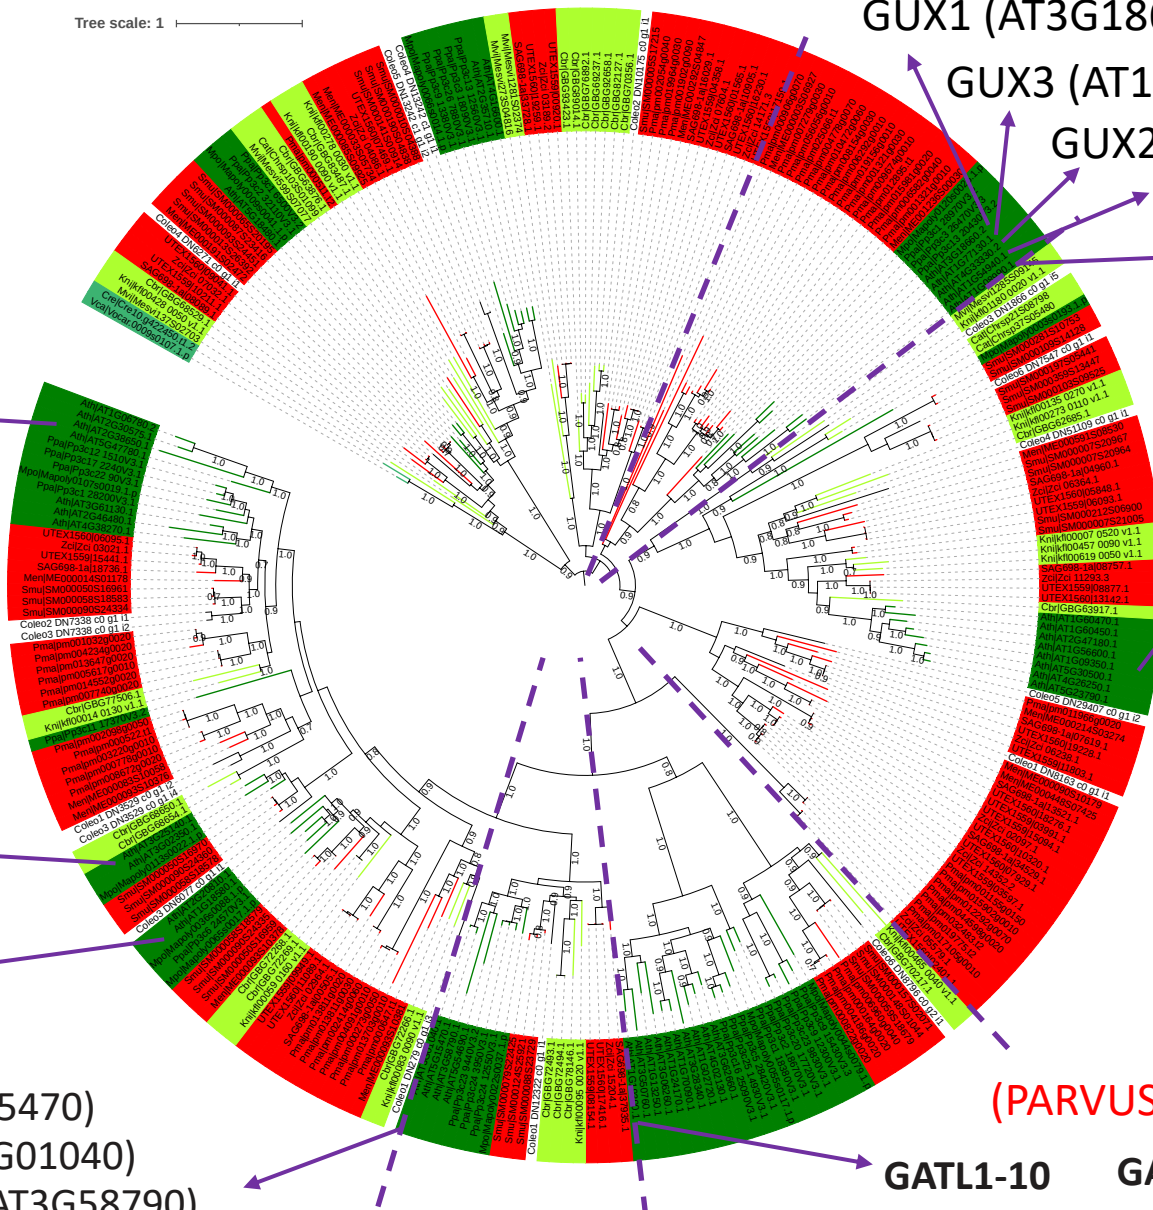

**GAUT12 (AT5G54690) (IRX8: Xylan)**

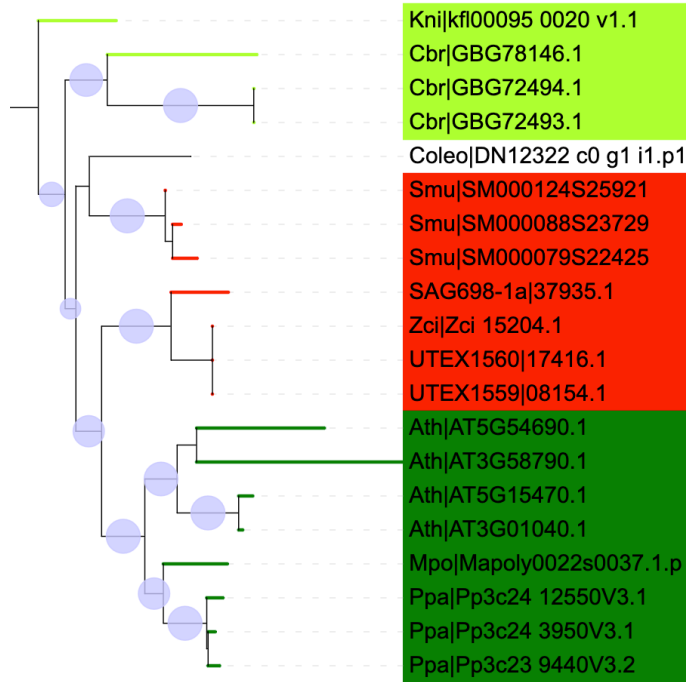

**(PARVUS\_GATL: Xylan)**

**GATL1 (AT1G19300)**

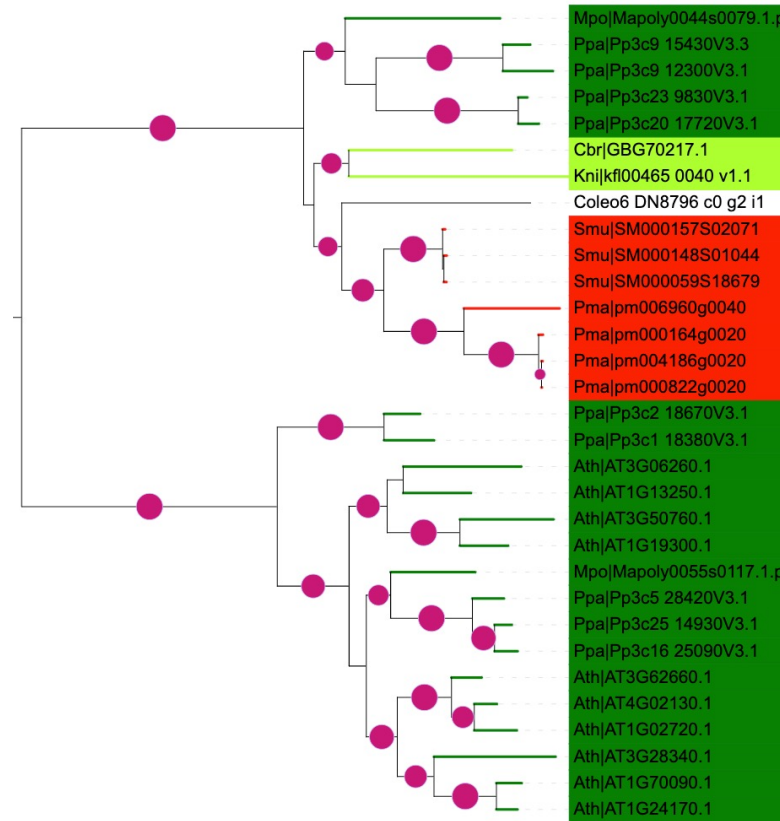

**GUX1 (AT3G18660)**

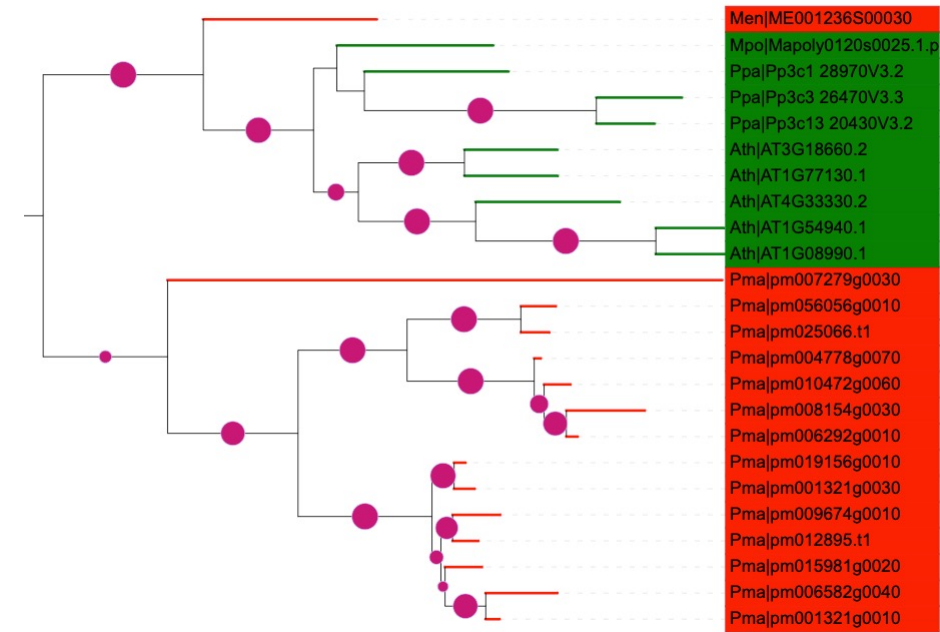

# Data S1-39b

Tree scale: 1

**Colored ranges**

- Zygnematophyceae
- Embryophyta
- Charophyta

**bootstrap**

- 0.7
- 0.77
- 0.85
- 0.93
- 1

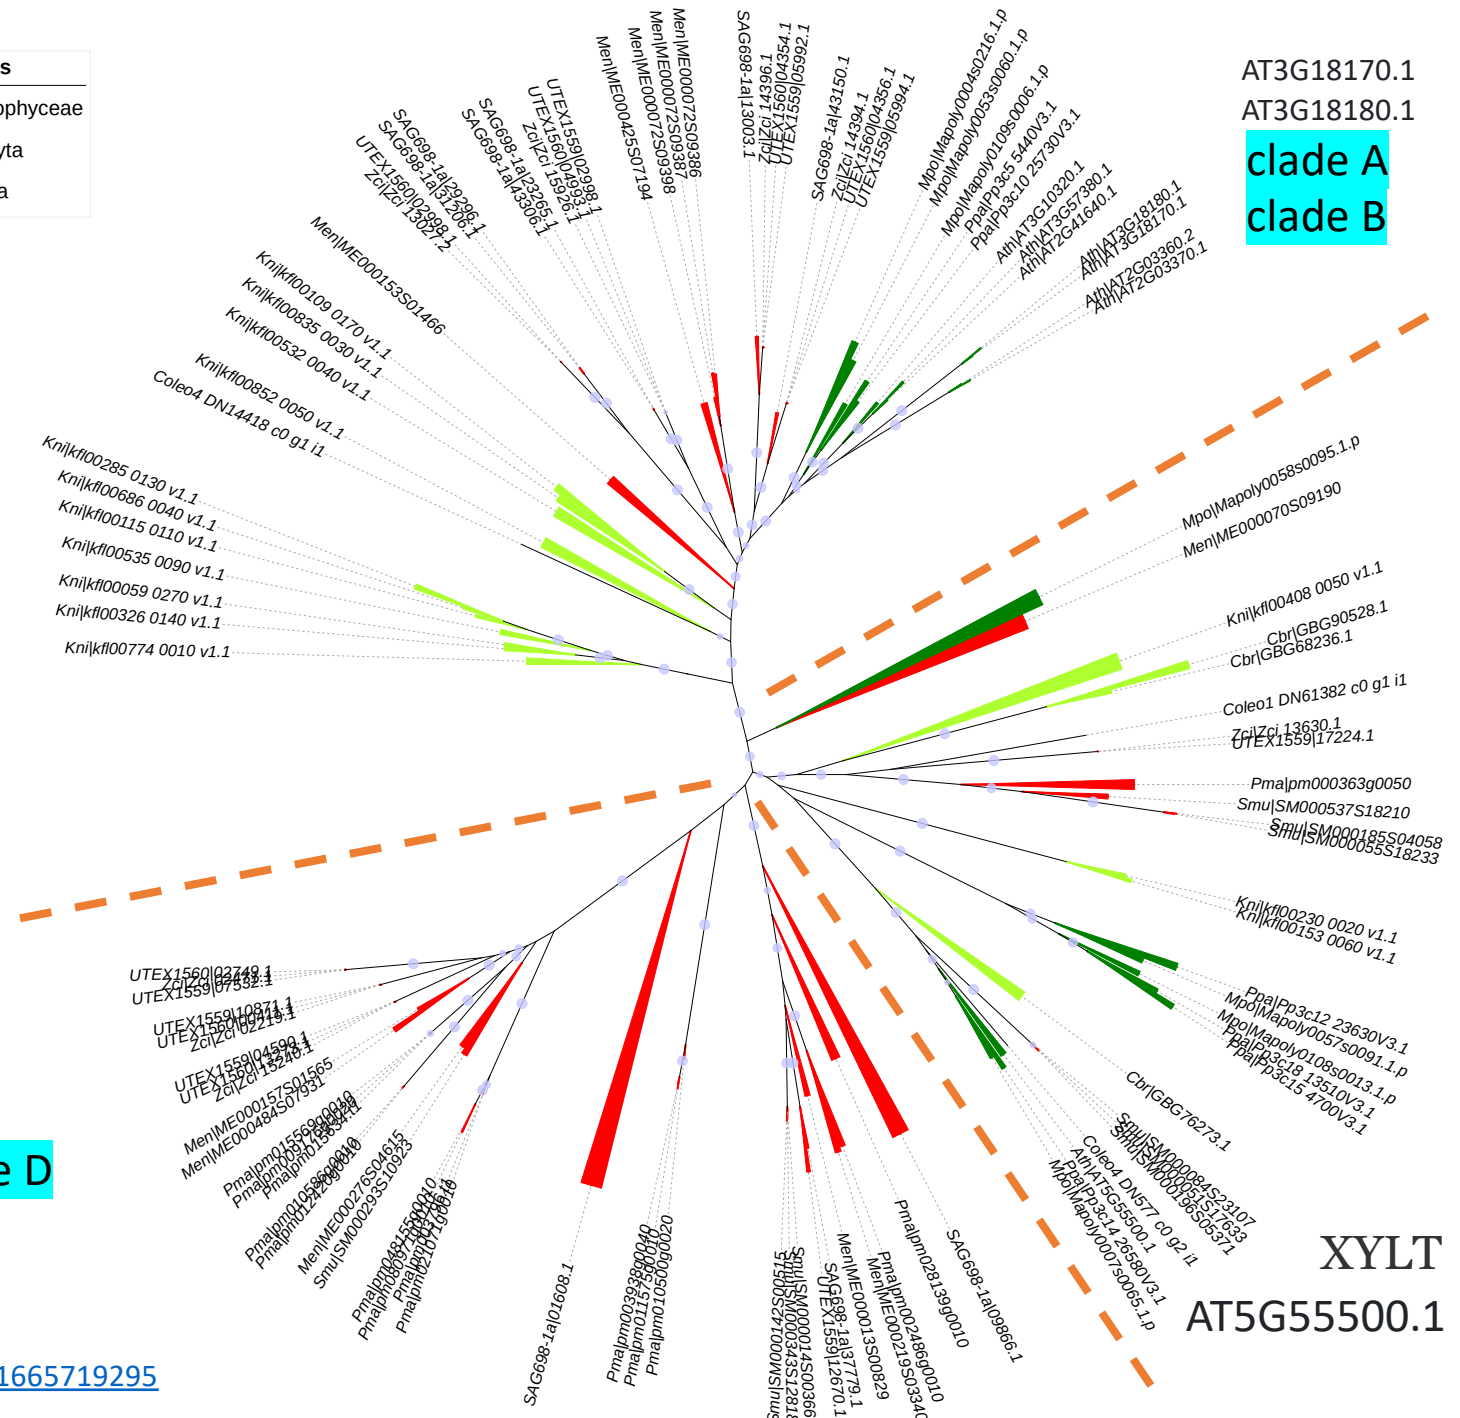

AT3G18170.1  
AT3G18180.1  
**clade A**  
**clade B**

xylan

**clade D**

N-glycan

XYLT  
AT5G55500.1

**clade C**



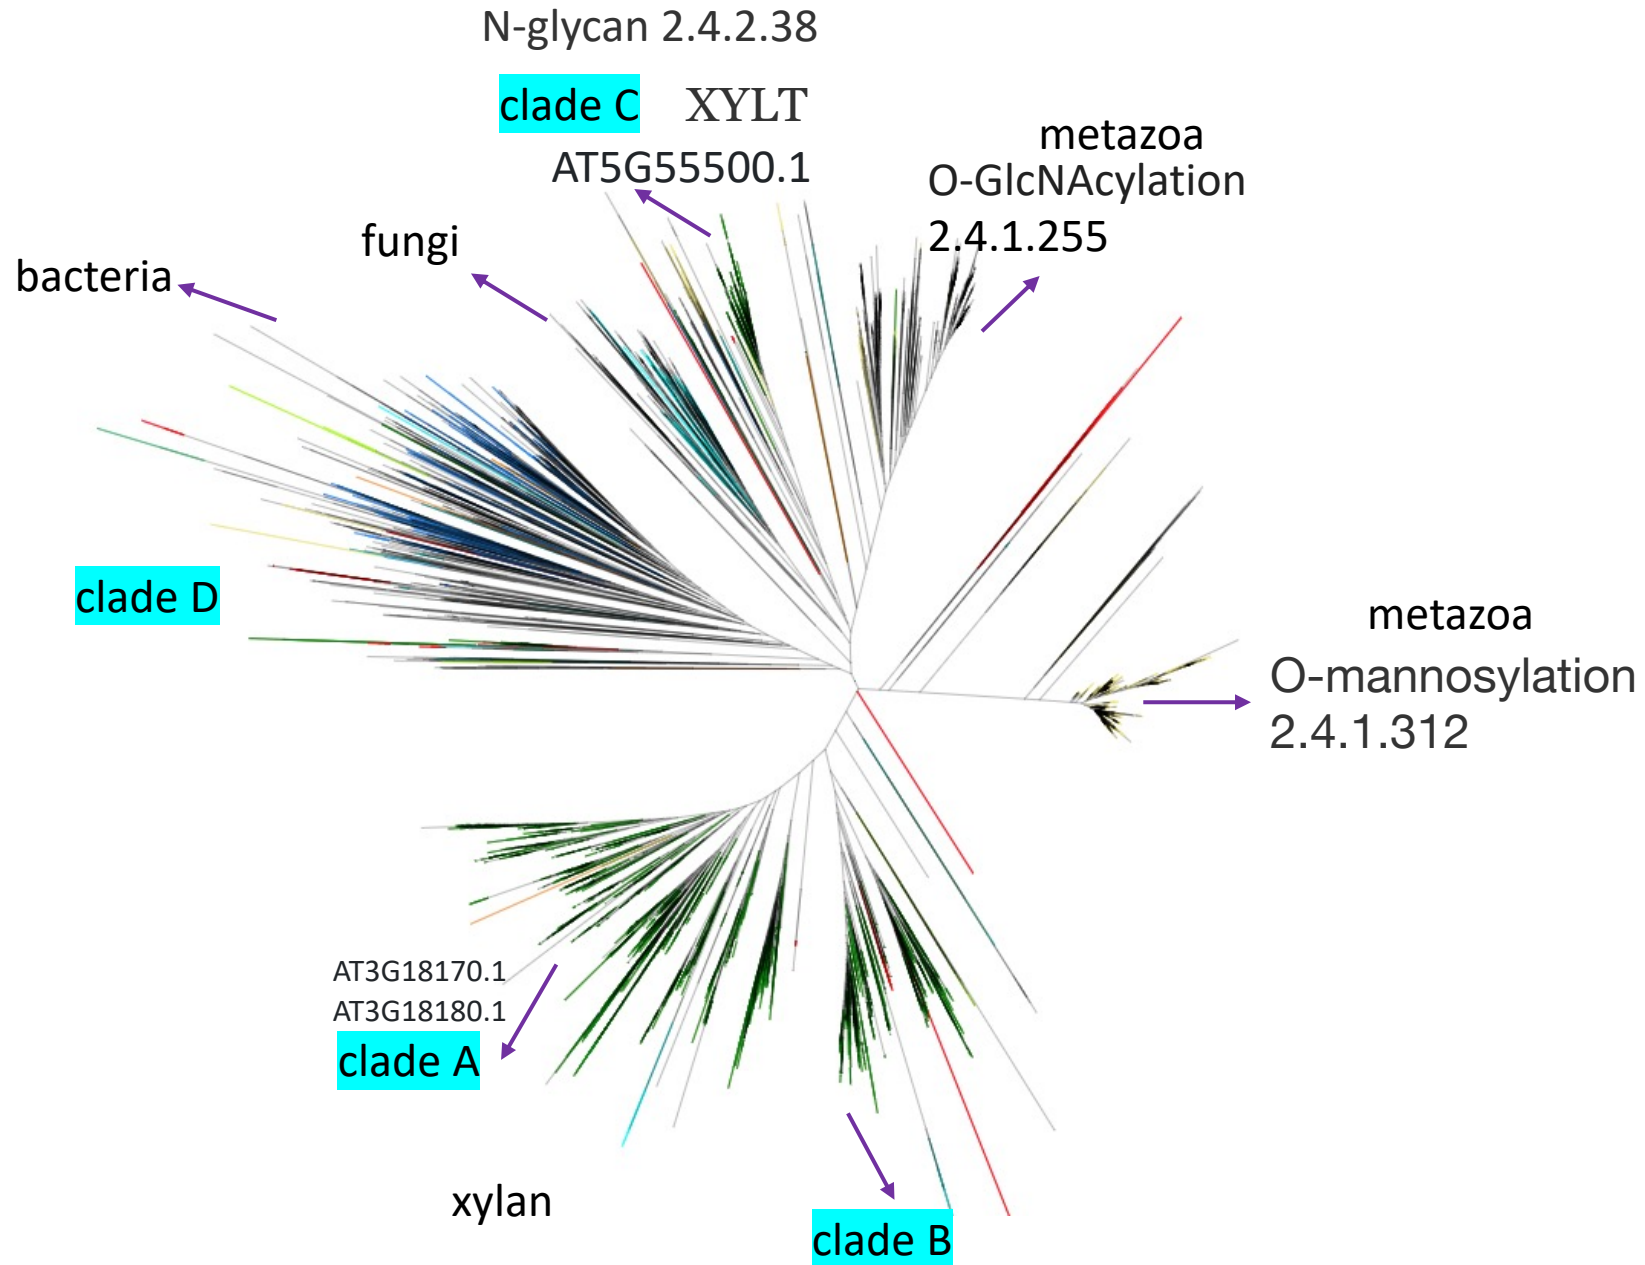

Tree scale: 1

# GXMT1 + nr

DUF579  
PF04669

<https://itol.embl.de/tree/20812770255334321666122408>

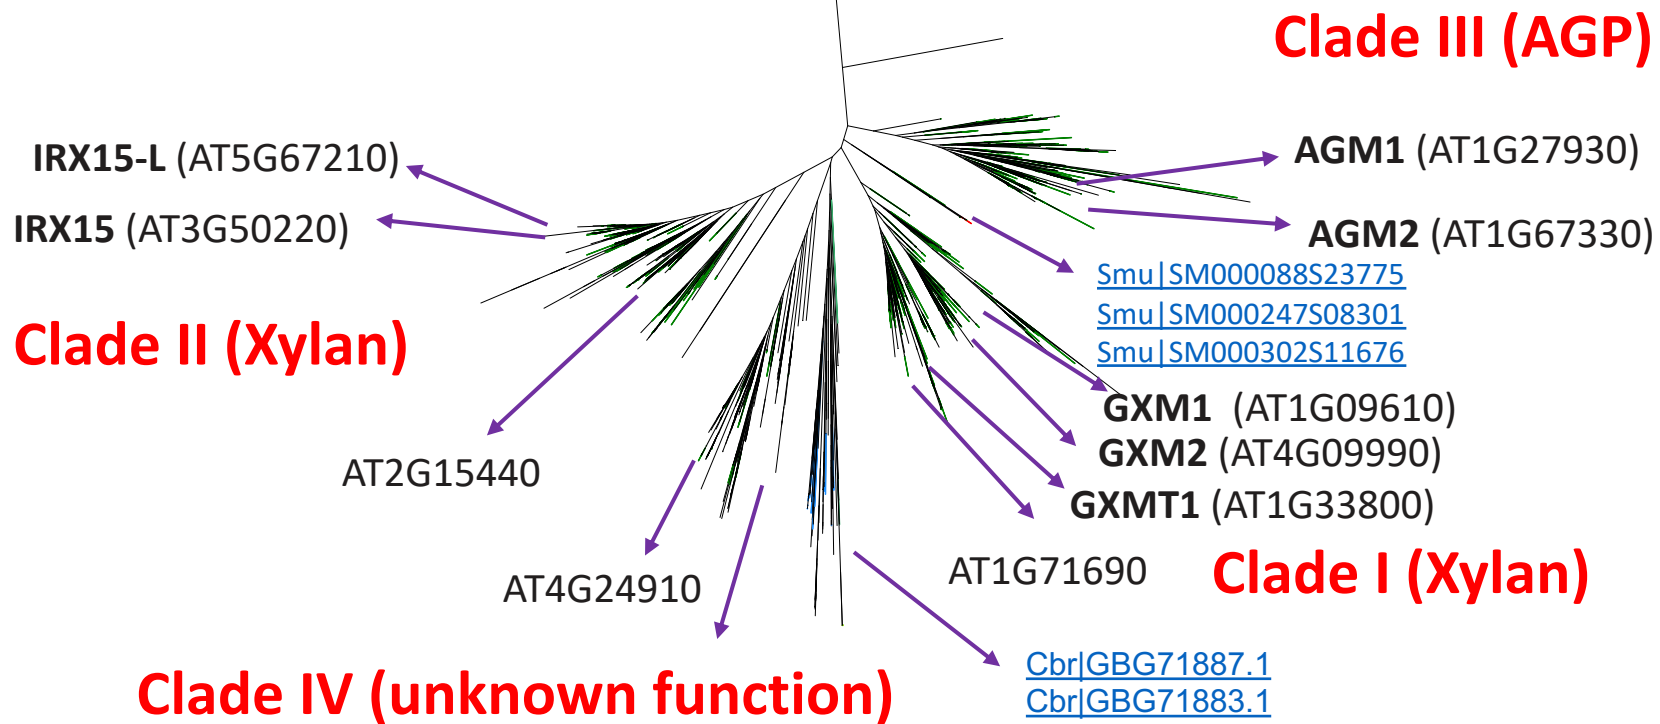

Tree scale: 1

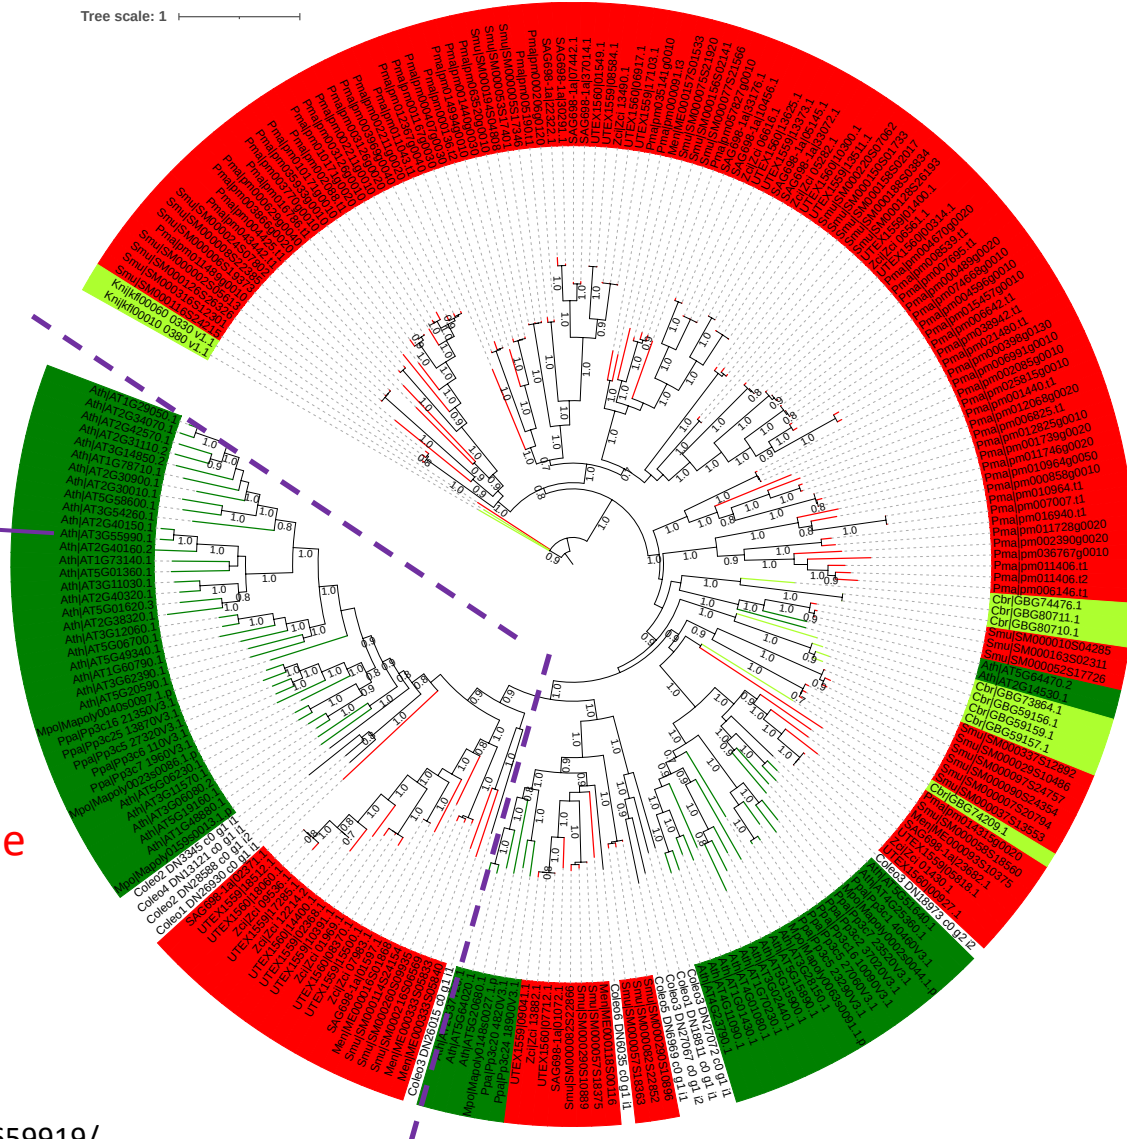

ESK1 (AT3G55990) ←

LCA of Zygnematophyceae and land plants likely already contained Xylan O-acetyltransferases

References

- <https://pubmed.ncbi.nlm.nih.gov/23659919/>
- <https://pubmed.ncbi.nlm.nih.gov/25141999/>

# BS1 + DARX1

DARX1 (AT1G09390)

BS1 (AT5G45910)

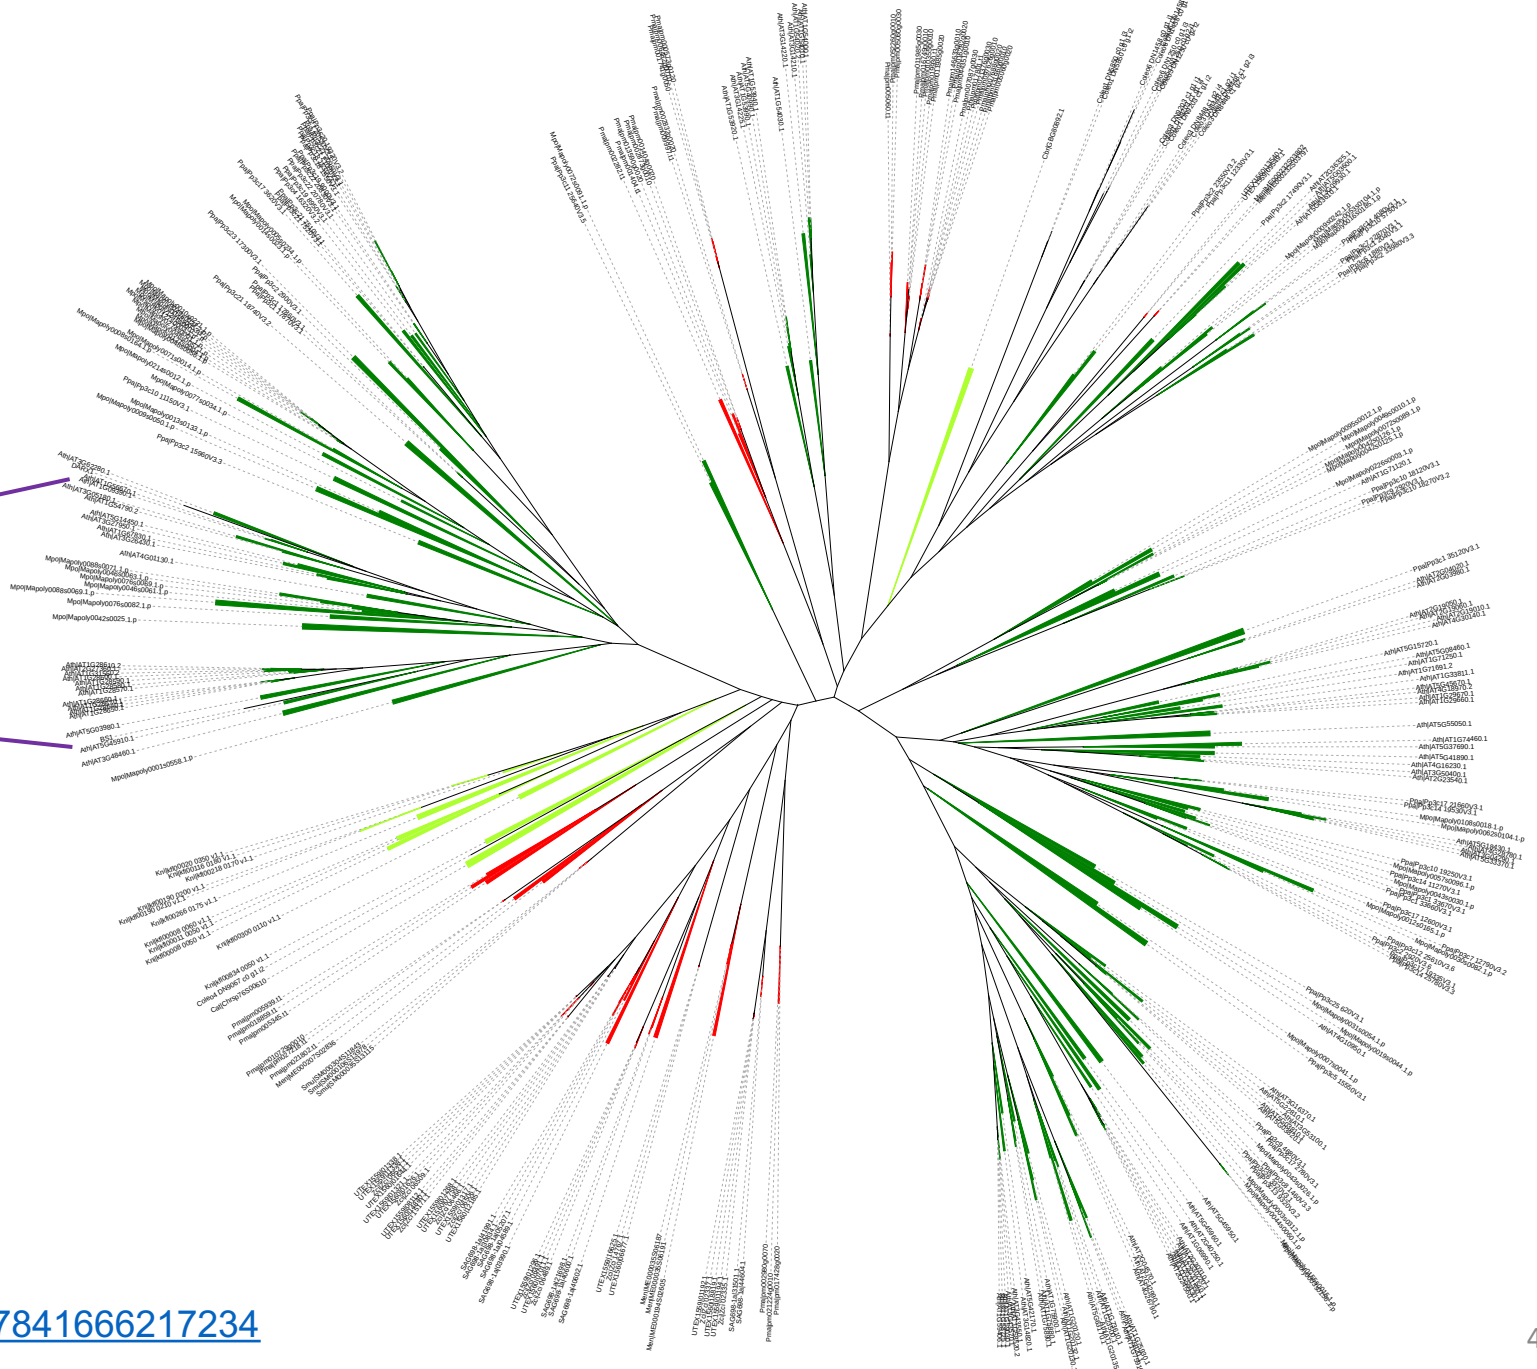

AGP biosynthesis

AGP degradation

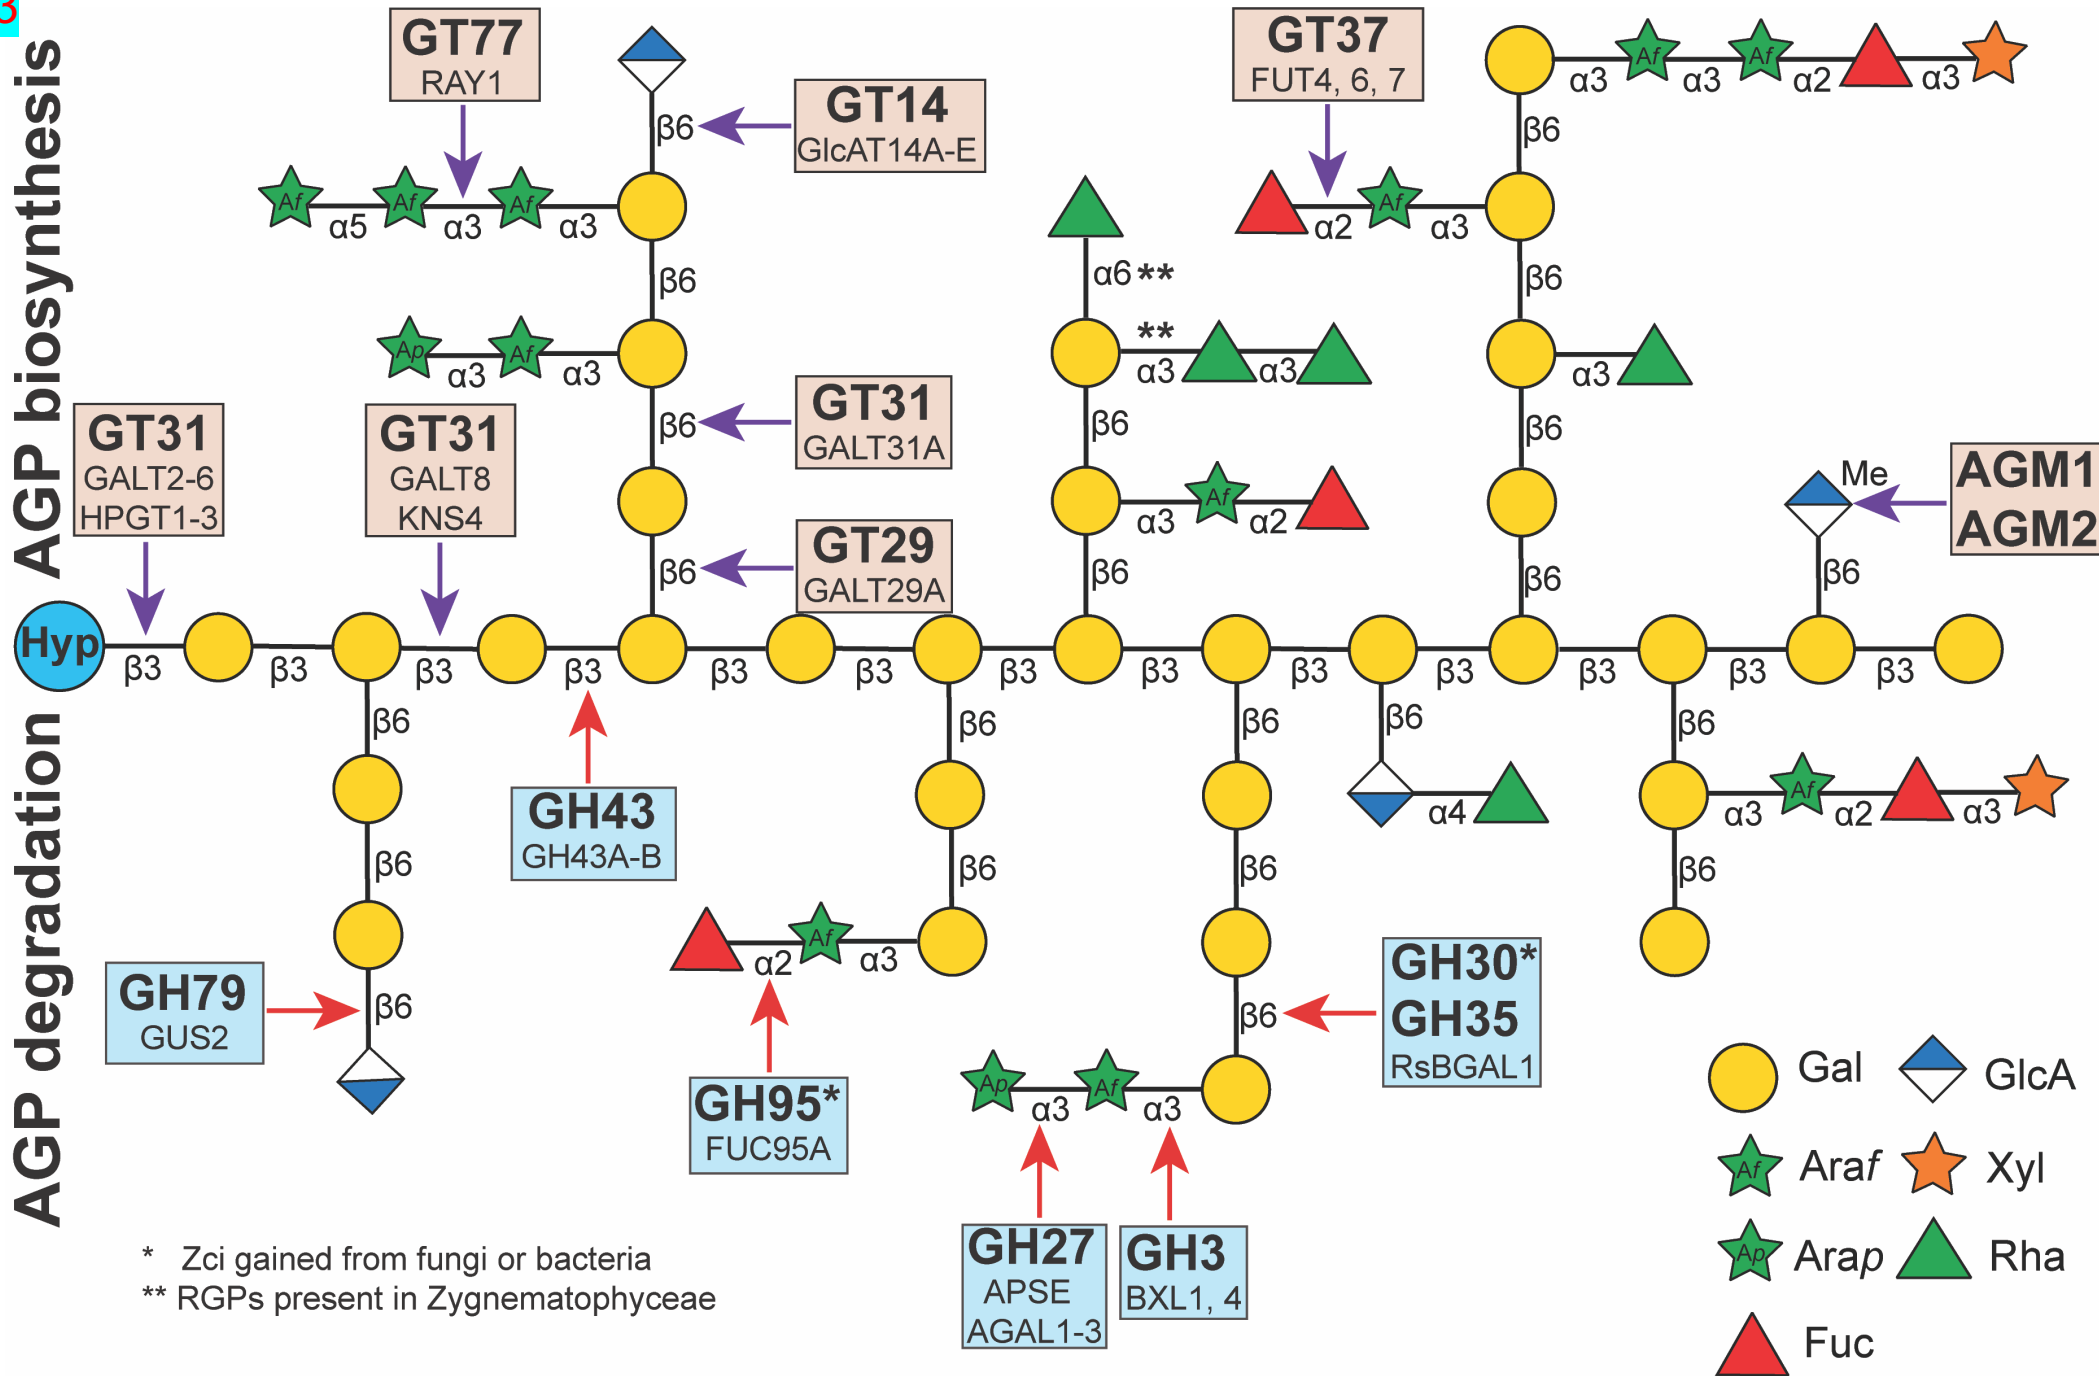

\* Zci gained from fungi or bacteria  
 \*\* RGP's present in Zygnematophyceae

# AGP

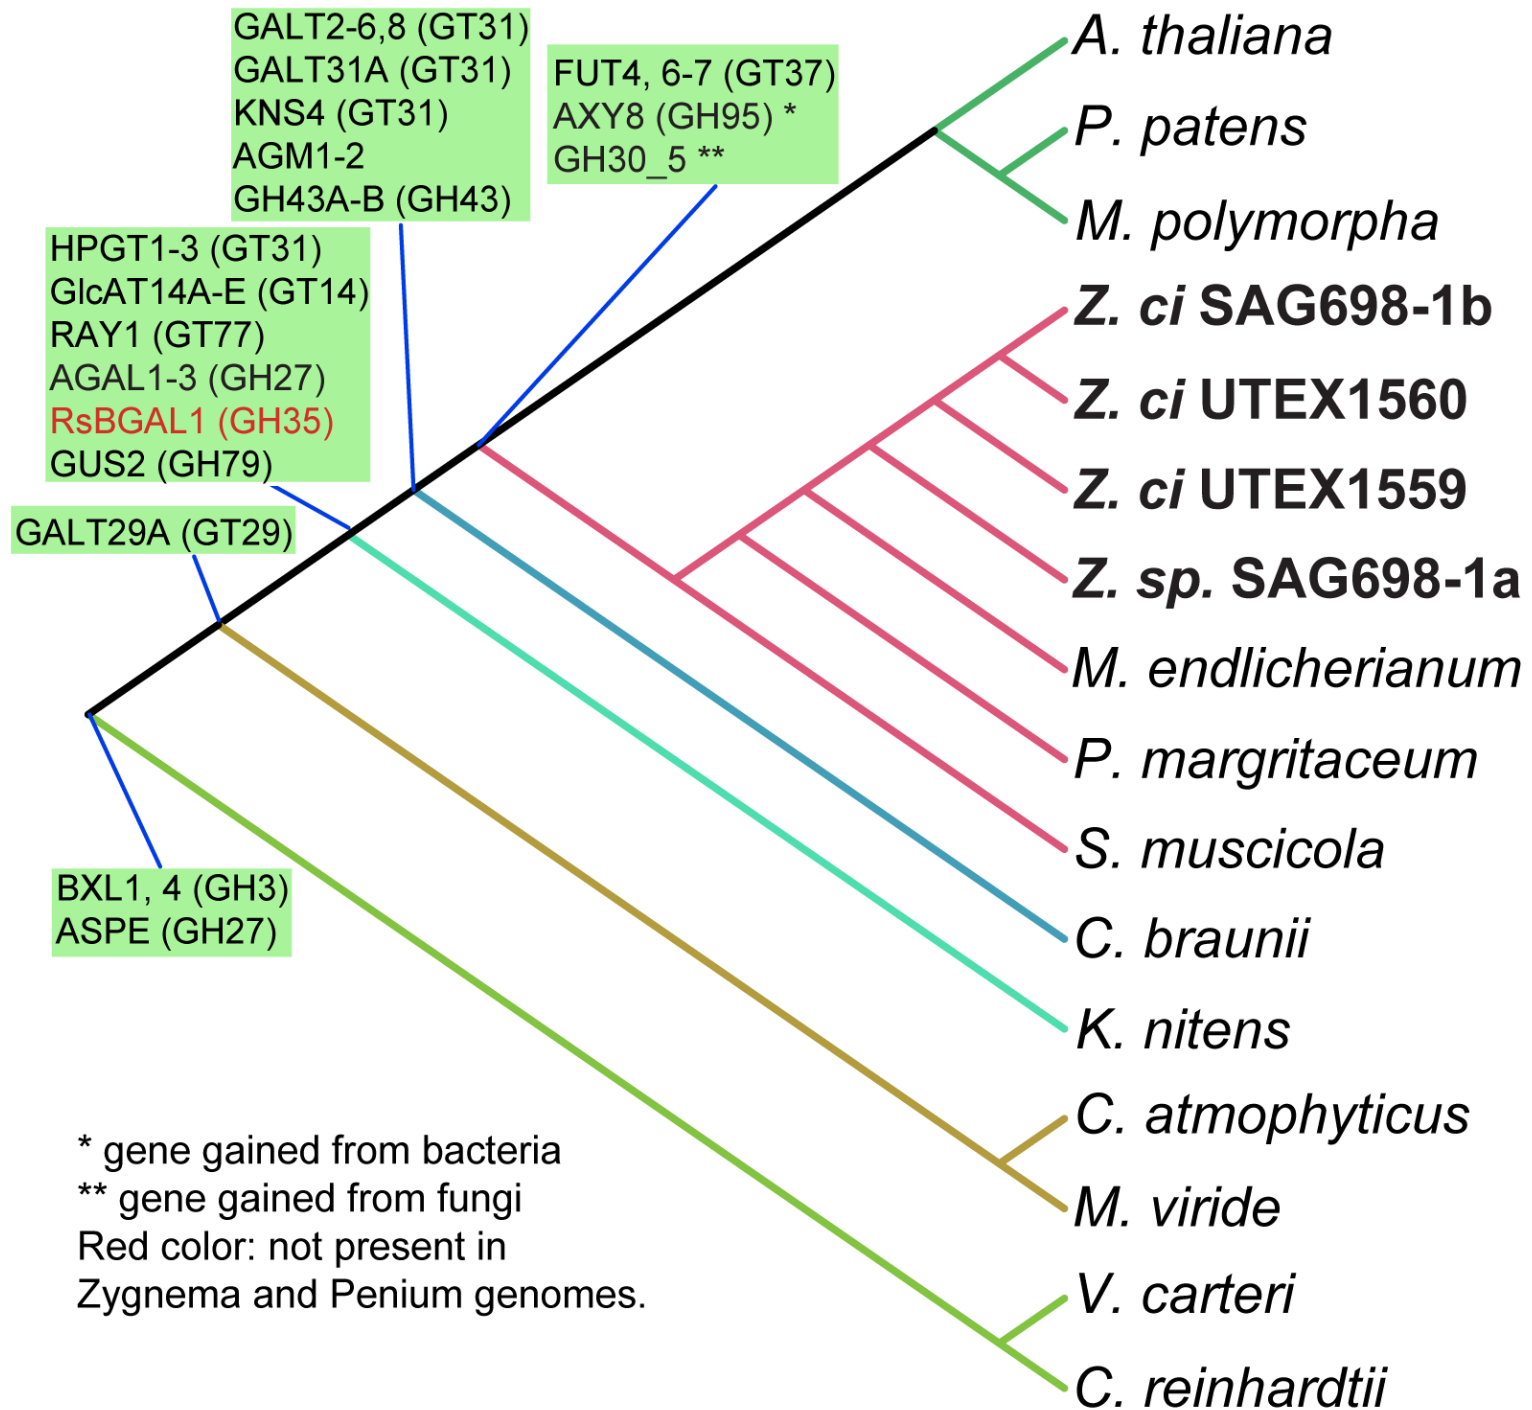

\* gene gained from bacteria  
 \*\* gene gained from fungi  
 Red color: not present in Zygnema and Penium genomes.

**Data S1-44**

**GT31**

Basu, D., Liang, Y., Liu, X., Himmeldirk, K., Faik, A., Kieliszewski, M., et al. (2013). Functional identification of a hydroxyproline-o-galactosyltransferase specific for arabinogalactan protein biosynthesis in Arabidopsis. J. Biol. Chem. 288, 10132–10143. doi: 10.1074/jbc.M112.432609

Basu D, Wang W, Ma S, DeBrosse T, Poirier E, Emch K, Soukup E, Tian L, Showalter AM. Two Hydroxyproline Galactosyltransferases, GALT5 and GALT2, Function in Arabinogalactan-Protein Glycosylation, Growth and Development in Arabidopsis. PLoS One. 2015 May 14;10(5):e0125624. doi: 10.1371/journal.pone.0125624.

Basu D, Tian L, Wang W, Bobbs S, Herock H, Travers A, Showalter AM. A small multigene hydroxyproline-O-galactosyltransferase family functions in arabinogalactan-protein glycosylation, growth and development in Arabidopsis. BMC Plant Biol. 2015 Dec 21;15:295. doi: 10.1186/s12870-015-0670-7.

Strasser R, Bondili JS, Vavra U, Schoberer J, Svoboda B, Glössl J, Léonard R, Stadlmann J, Altmann F, Steinkellner H, Mach L. A unique beta1,3-galactosyltransferase is indispensable for the biosynthesis of N-glycans containing Lewis a structures in Arabidopsis thaliana. Plant Cell. 2007 Jul;19(7):2278-92. doi: 10.1105/tpc.107.052985.

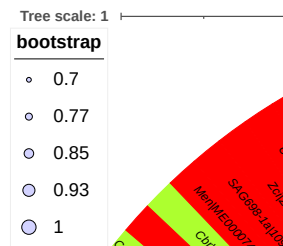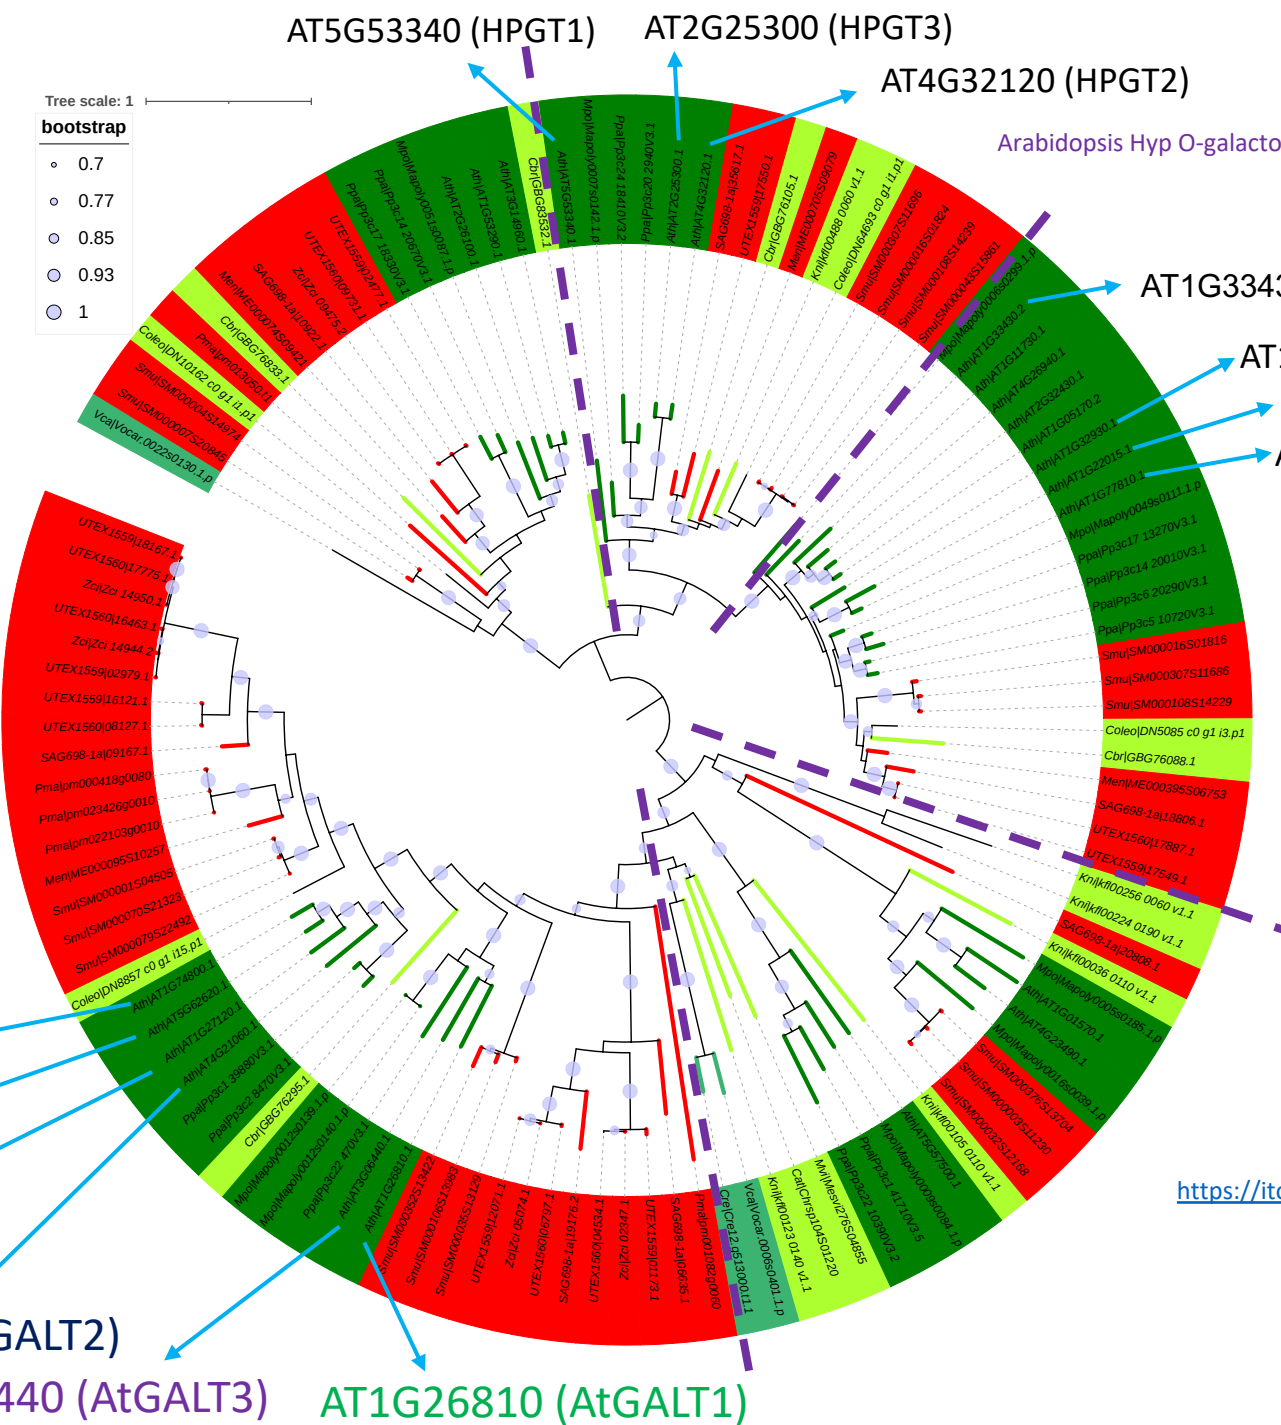

Arabidopsis Hyp O-galactosyltransferases: HPGT1, HPGT2 and HPGT3

Ogawa-Ohnishi M, Matsubayashi Y. Identification of three potent hydroxyproline O-galactosyltransferases in Arabidopsis. Plant J. 2015 Mar;81(5):736-46. doi: 10.1111/tjp.12764.

Geshi, N., Johansen, J. N., Dilokpimol, A., Rolland, A., Belcram, K., Verger, S., et al. (2013). A galactosyltransferase acting on arabinogalactan protein glycans is essential for embryo development in Arabidopsis. Plant J. 76, 128–137. doi: 10.1111/tjp.12281

Narciso JO, Zeng W, Ford K, Lampugnani ER, Humphries J, Astarheim I, van de Meene A, Bacic A, Doblin MS. Biochemical and Functional Characterization of GALT8, an Arabidopsis GT31 β-(1,3)-Galactosyltransferase That Influences Seedling Development. Front Plant Sci. 2021 May 25;12:678564. doi: 10.3389/fpls.2021.678564.

<https://itol.embl.de/tree/208127240222157721668394053>

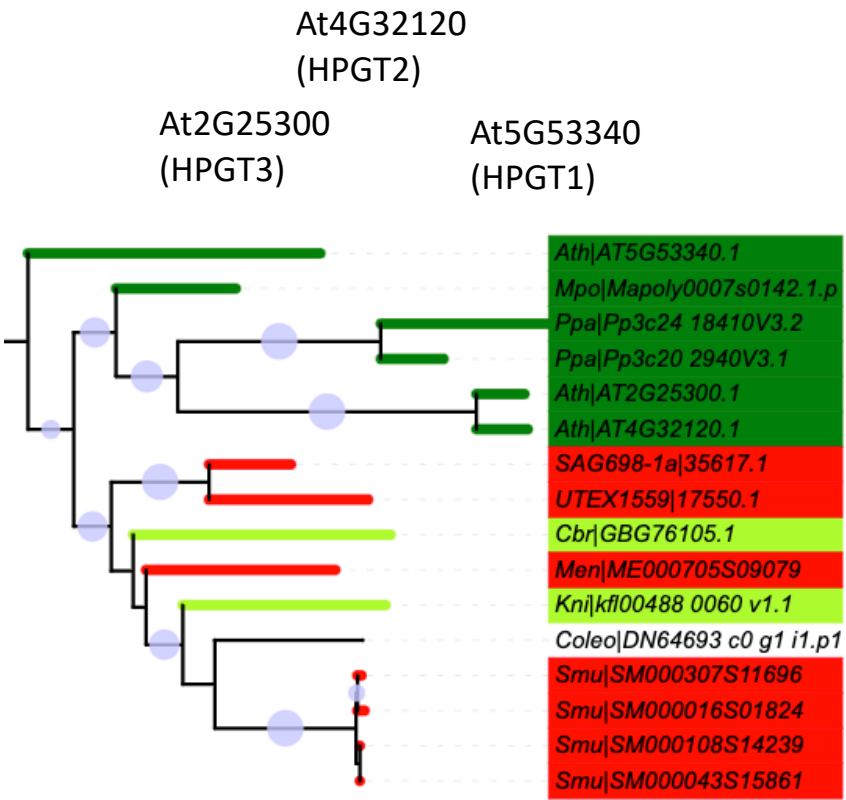

$\beta$ -1,3-galactan (backbone) initiate

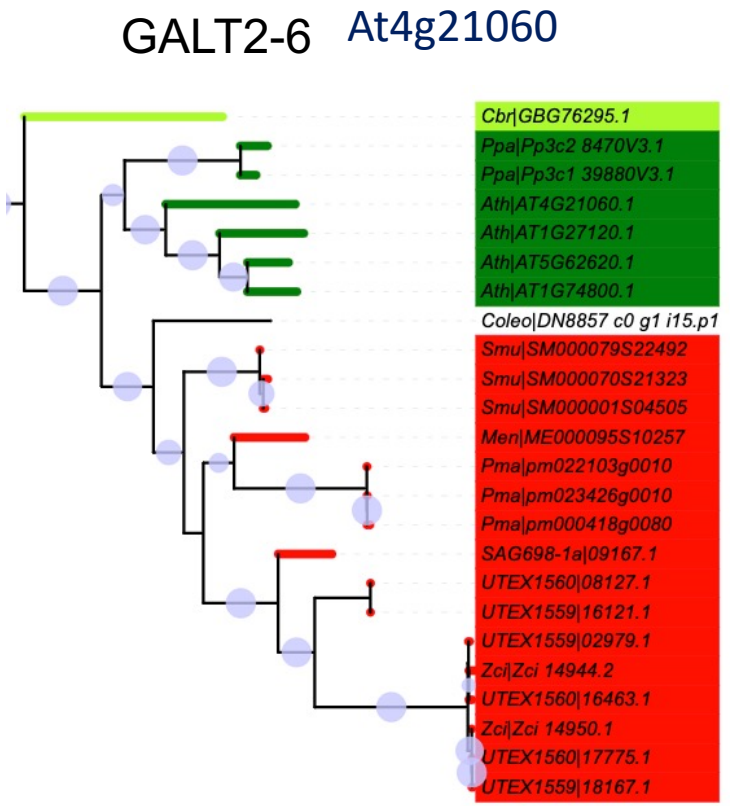

$\beta$ -1,3-galactan initiate

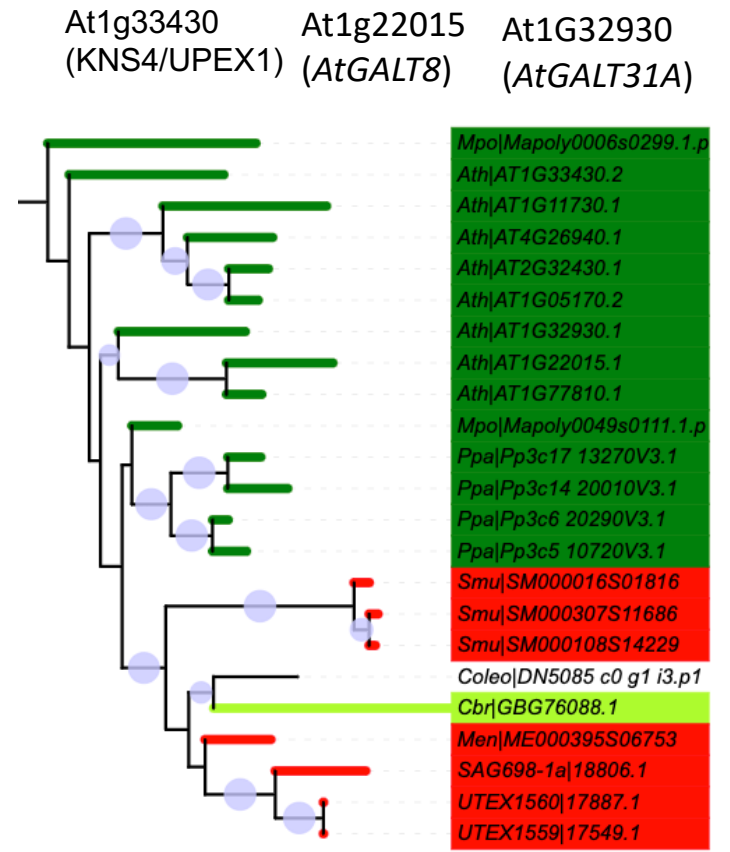

$\beta$ -1,3-galactan  
 $\beta$ -1,6-galactan (sidechain) elongate



Tree scale: 1

# GT29 + Coleochaete

Data S1-46

<https://itol.embl.de/tree/20812783235334831665116092>

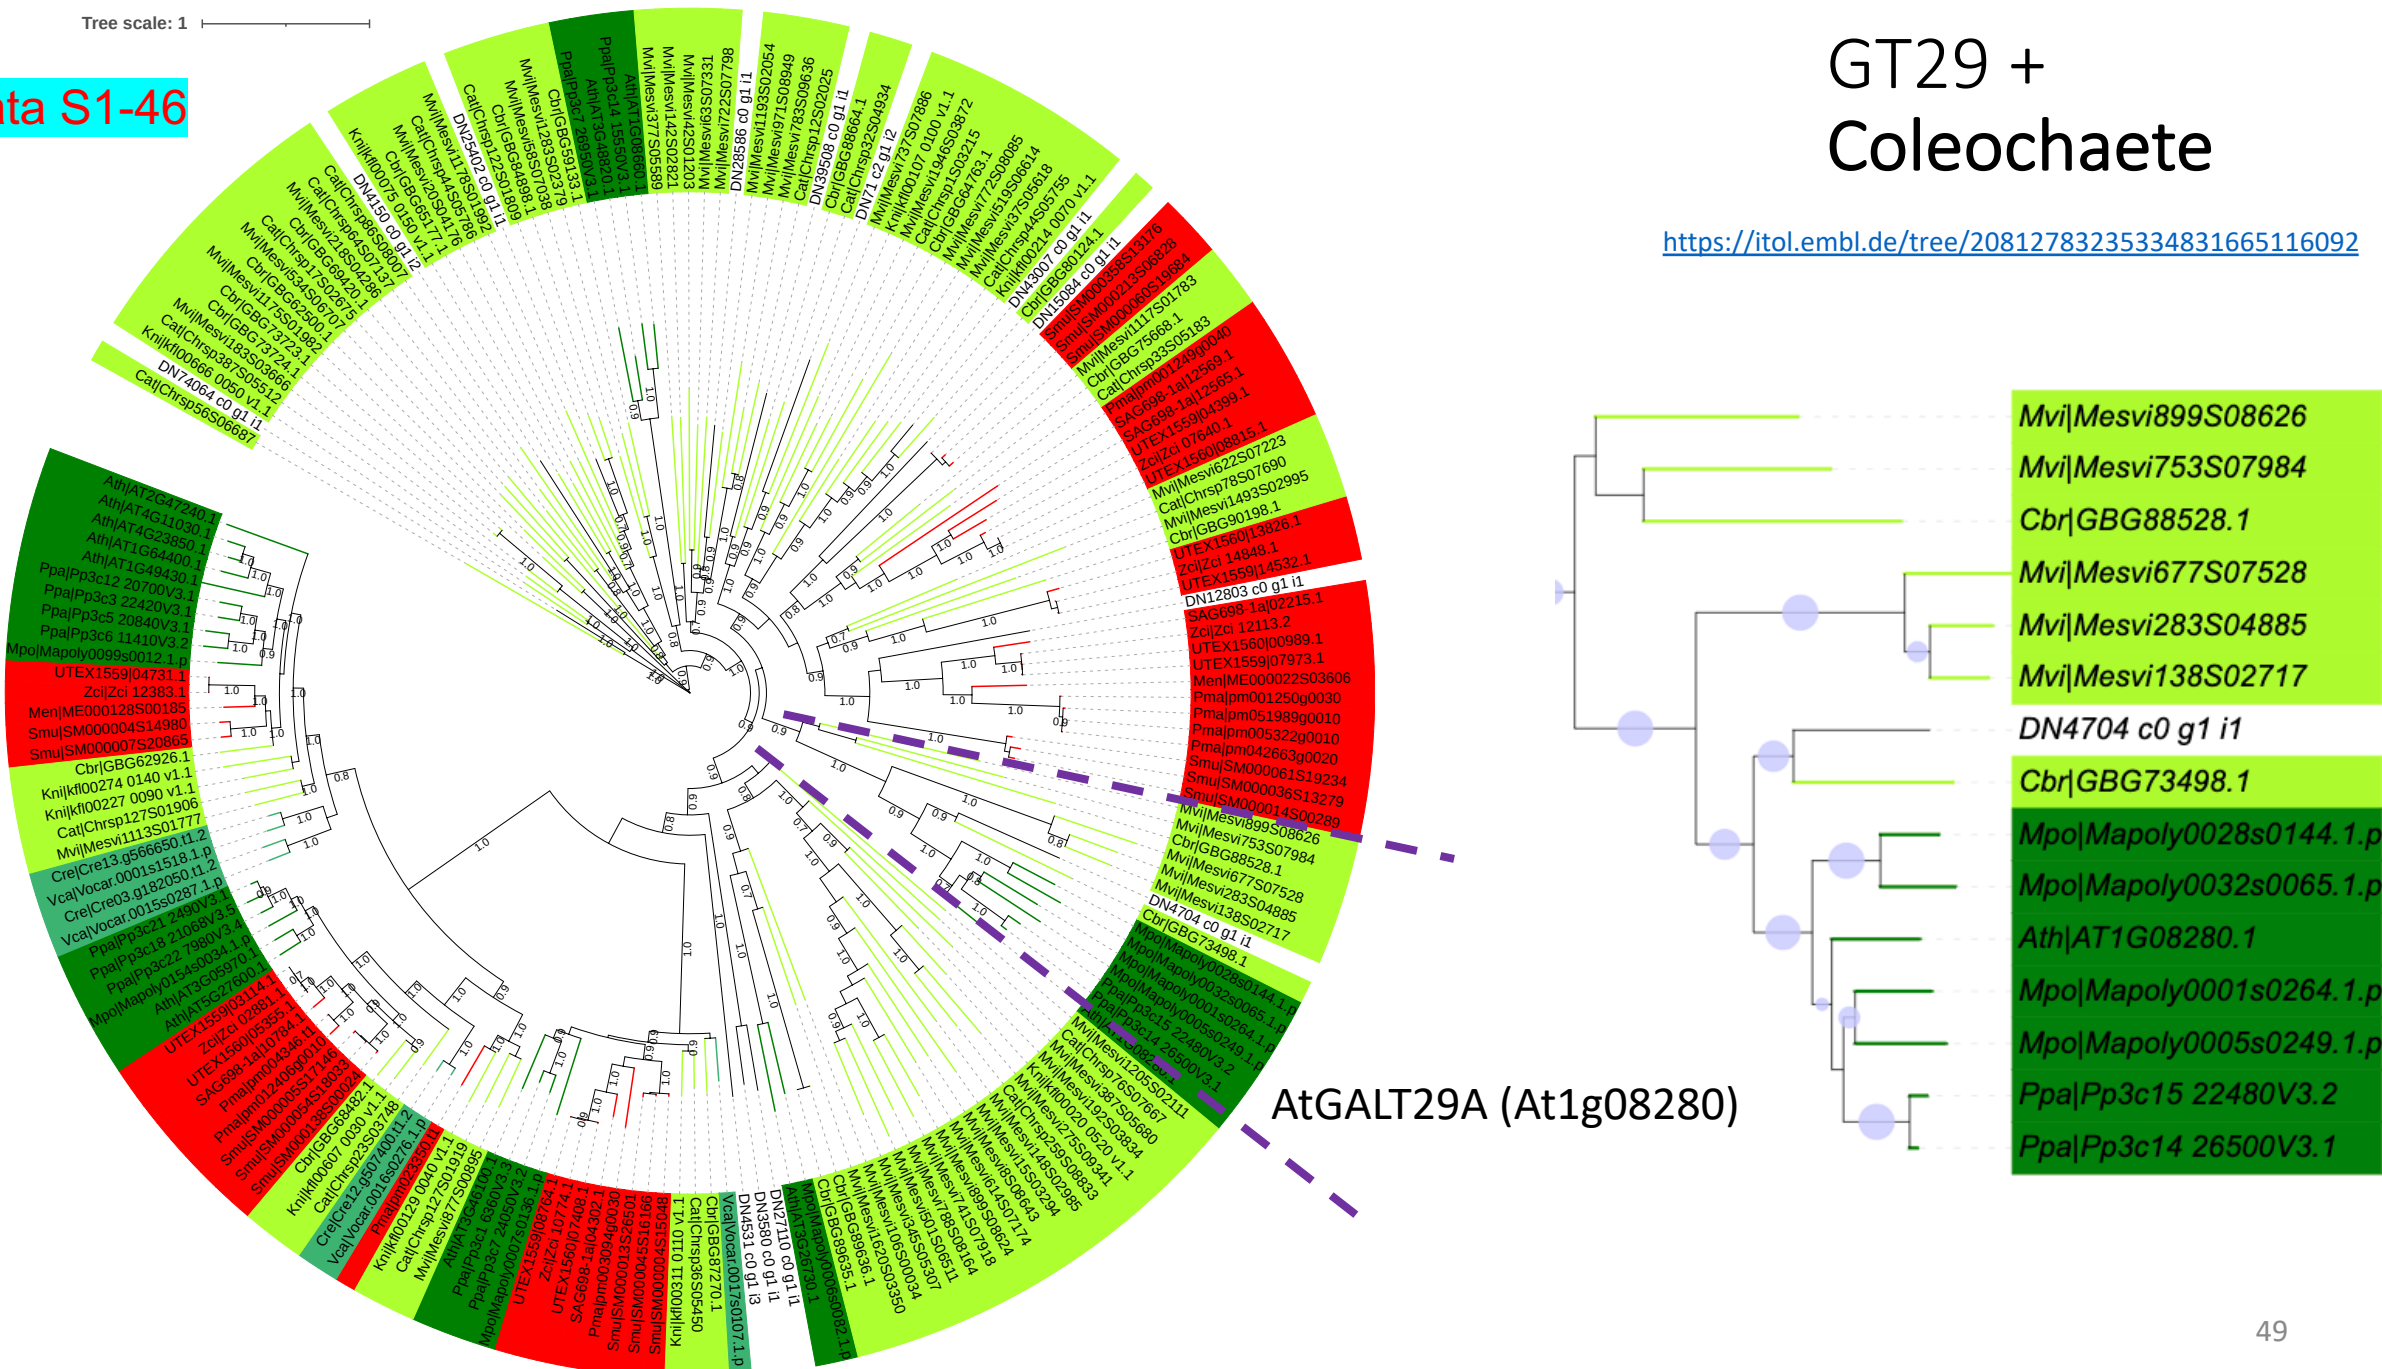

- Mvi|Mesvi899S08626*
- Mvi|Mesvi753S07984*
- Cbr|GBG88528.1*
- Mvi|Mesvi677S07528*
- Mvi|Mesvi283S04885*
- Mvi|Mesvi138S02717*
- DN4704 c0 g1 i1*
- Cbr|GBG73498.1*
- Mpo|Mapoly0028s0144.1.p*
- Mpo|Mapoly0032s0065.1.p*
- Ath|AT1G08280.1*
- Mpo|Mapoly0001s0264.1.p*
- Mpo|Mapoly0005s0249.1.p*
- Ppa|Pp3c15 22480V3.2*
- Ppa|Pp3c14 26500V3.1*

Tree scale: 1

AGP

At1g70630  
(REDUCED  
ARABINOSE  
YARIV1, RAY1)

a putative arabinofuranosyltransferase

Gille, S., Sharma, V., Baidoo, E. E. K., Keasling, J. D., Scheller, H. V., and Pauly, M. (2013). Arabinosylation of a yariv-precipitable cell wall polymer impacts plant growth as exemplified by the arabidopsis glycosyltransferase mutant ray1. *Mol. Plant* 6, 1369–1372. doi: 10.1093/mp/sst029

GT77 +  
Coleochaete

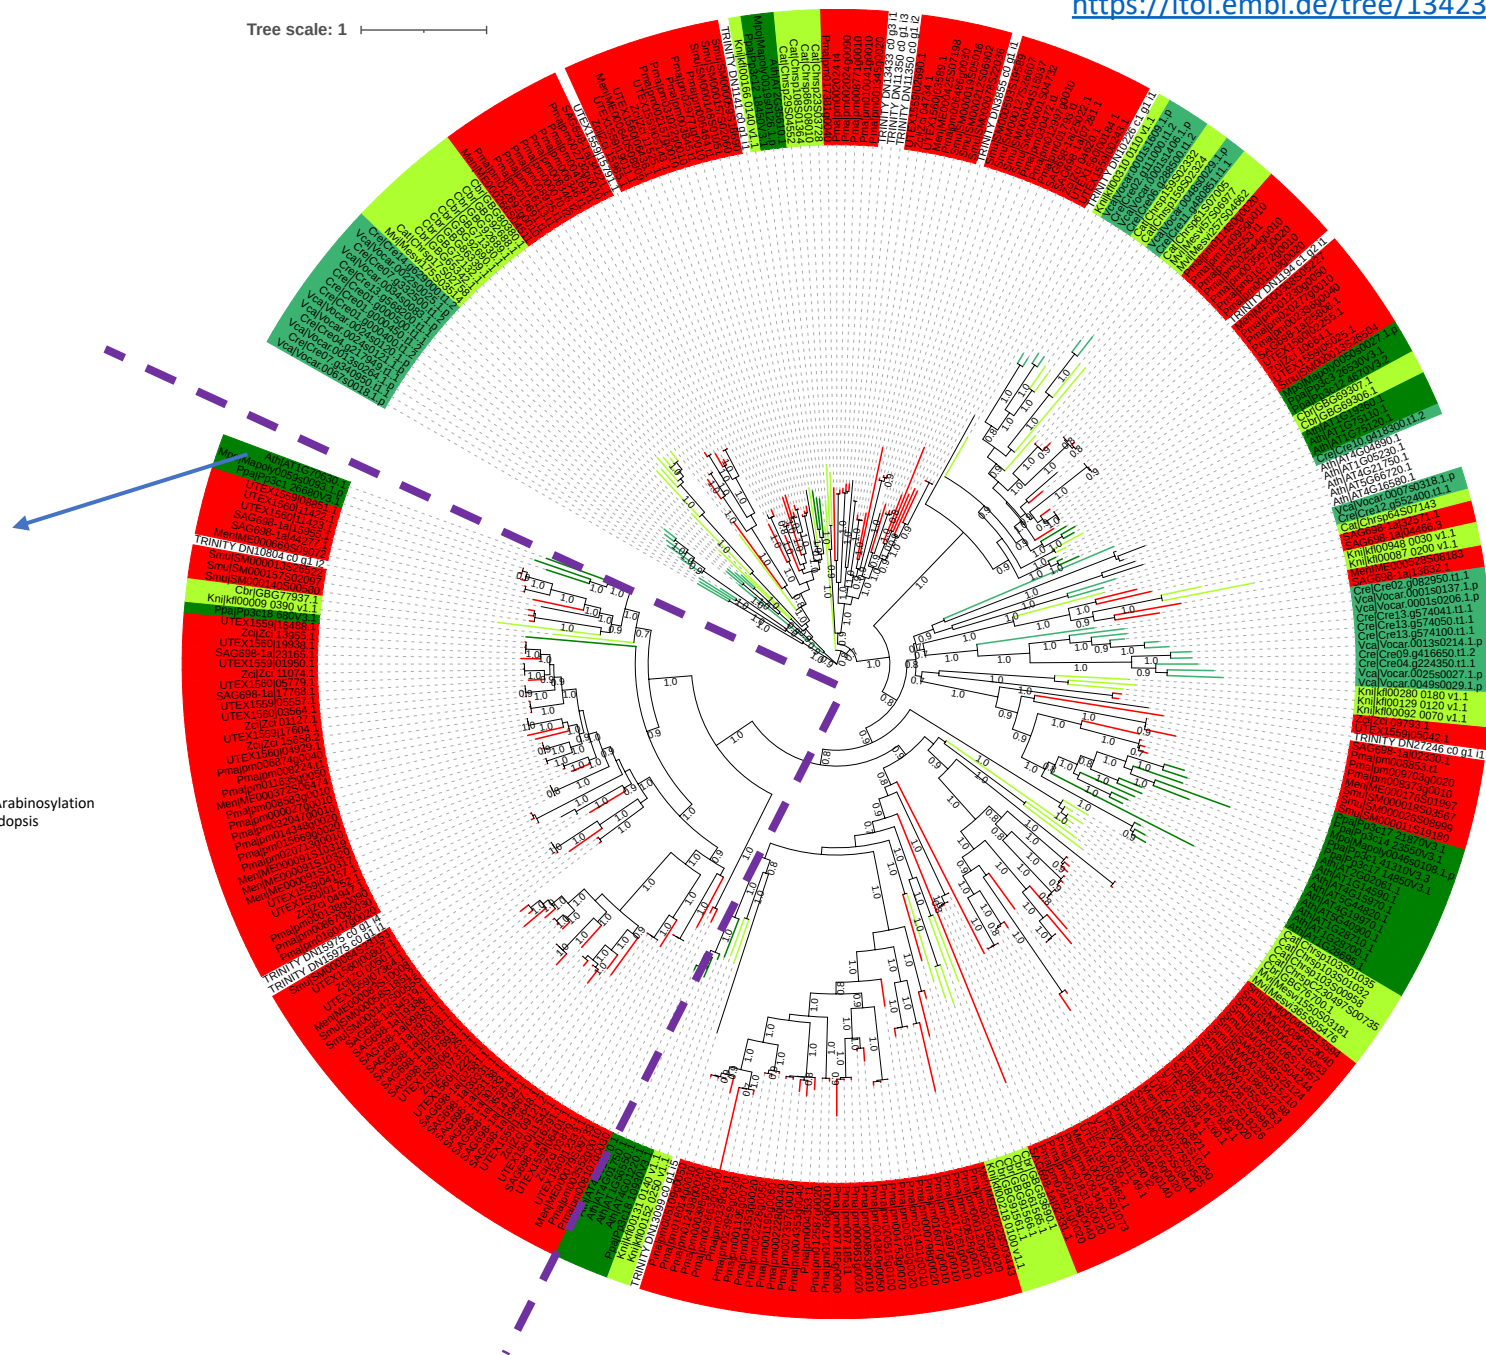



Data S1-49

# GT37

Tree scale: 1

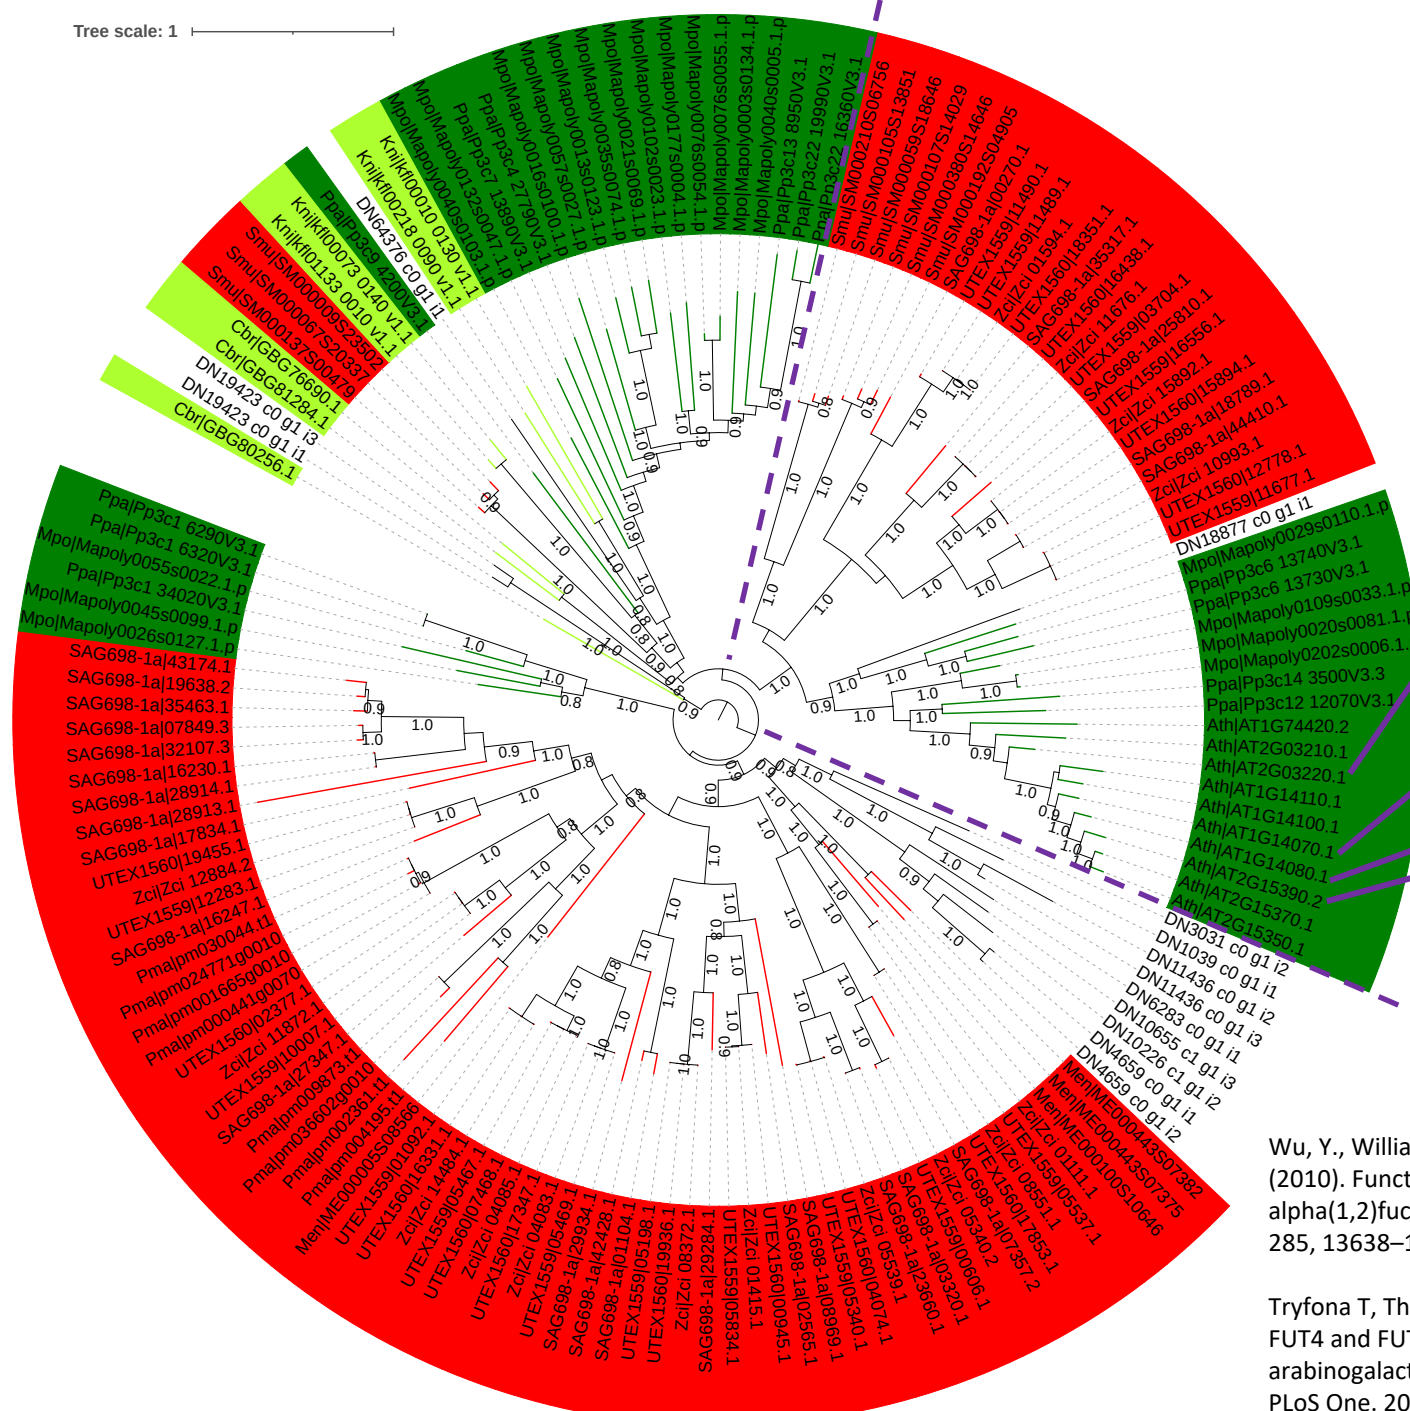

Vanzin GF, Madson M, Carpita NC, Raikhel NV, Keegstra K, Reiter WD. The mur2 mutant of *Arabidopsis thaliana* lacks fucosylated xyloglucan because of a lesion in fucosyltransferase AtFUT1. *Proc Natl Acad Sci U S A*. 2002 Mar 5;99(5):3340-5. doi: 10.1073/pnas.052450699.

AtFUT1 (*At2g03220*)

AtFUT7 (*At1g14070*)

AtFUT6 (*At1g14080*)

AtFUT4 (*At2g15390*)

Two AtGT37 are  $\alpha$ -1,2-fucosyltransferases  
Link to biosynthesis of AGP glycans

Wu, Y., Williams, M., Bernard, S., Driouch, A., Showalter, A. M., and Faik, A. (2010). Functional identification of two nonredundant *Arabidopsis* alpha(1,2)fucosyltransferases specific to arabinogalactan proteins. *J. Biol. Chem.* 285, 13638–13645. doi: 10.1074/jbc.M110.102715

Tryfona T, Theys TE, Wagner T, Stott K, Keegstra K, Dupree P. Characterisation of FUT4 and FUT6  $\alpha$ -(1  $\rightarrow$  2)-fucosyltransferases reveals that absence of root arabinogalactan fucosylation increases *Arabidopsis* root growth salt sensitivity. *PLoS One*. 2014 Mar 25;9(3):e93291. doi: 10.1371/journal.pone.0093291.

# Data S1-50

hmmsearch  
PF04669

|                 |     |                    |     |         |    |     |     |     |                   |  |
|-----------------|-----|--------------------|-----|---------|----|-----|-----|-----|-------------------|--|
| Polysacc_synt_4 | 190 | Ath AT1G09610.1    | 282 | 3.8e-70 | 1  | 190 | 79  | 263 | 0.994736842105263 |  |
| Polysacc_synt_4 | 190 | Ath AT1G27930.1    | 289 | 1.8e-74 | 1  | 190 | 83  | 270 | 0.994736842105263 |  |
| Polysacc_synt_4 | 190 | Ath AT1G33800.1    | 297 | 1.5e-71 | 2  | 190 | 93  | 275 | 0.989473684210526 |  |
| Polysacc_synt_4 | 190 | Ath AT1G67330.1    | 291 | 2.5e-75 | 1  | 190 | 86  | 274 | 0.994736842105263 |  |
| Polysacc_synt_4 | 190 | Ath AT1G71690.1    | 295 | 2.4e-77 | 2  | 190 | 92  | 278 | 0.989473684210526 |  |
| Polysacc_synt_4 | 190 | Ath AT2G15440.1    | 329 | 3e-71   | 2  | 190 | 99  | 287 | 0.989473684210526 |  |
| Polysacc_synt_4 | 190 | Ath AT3G50220.1    | 322 | 8.9e-74 | 2  | 189 | 109 | 296 | 0.984210526315789 |  |
| Polysacc_synt_4 | 190 | Ath AT4G09990.1    | 290 | 7.5e-70 | 2  | 190 | 85  | 268 | 0.989473684210526 |  |
| Polysacc_synt_4 | 190 | Ath AT4G24910.1    | 315 | 7.2e-65 | 2  | 190 | 105 | 295 | 0.989473684210526 |  |
| Polysacc_synt_4 | 190 | Ath AT5G67210.1    | 317 | 1.2e-73 | 2  | 189 | 102 | 289 | 0.984210526315789 |  |
| Polysacc_synt_4 | 190 | Cbr GBG71883.1     | 344 | 2.2e-16 | 17 | 176 | 165 | 316 | 0.836842105263158 |  |
| Polysacc_synt_4 | 190 | Cbr GBG71887.1     | 339 | 9.2e-14 | 17 | 175 | 152 | 302 | 0.831578947368421 |  |
| Polysacc_synt_4 | 190 | Smu SM000088S23775 | 194 | 8.5e-21 | 2  | 106 | 84  | 193 | 0.547368421052632 |  |
| Polysacc_synt_4 | 190 | Smu SM000247S08301 | 194 | 5.5e-21 | 2  | 106 | 84  | 193 | 0.547368421052632 |  |
| Polysacc_synt_4 | 190 | Smu SM000302S11676 | 194 | 3.4e-21 | 2  | 106 | 84  | 193 | 0.547368421052632 |  |

AGM1 & AGM2

|                    |      |         |     |     |    |     |     |     |     |           |      |
|--------------------|------|---------|-----|-----|----|-----|-----|-----|-----|-----------|------|
| Ath AT2G15440.1    | AGM2 | 36.604  | 265 | 150 | 8  | 51  | 303 | 33  | 291 | 5.73e-55  | 169  |
| Ath AT2G15440.1    | AGM1 | 38.034  | 234 | 133 | 7  | 76  | 303 | 62  | 289 | 1.30e-54  | 168  |
| Ath AT1G67330.1    | AGM2 | 100.000 | 291 | 0   | 0  | 1   | 291 | 1   | 291 | 0.0       | 611  |
| Ath AT1G67330.1    | AGM1 | 68.905  | 283 | 81  | 5  | 15  | 291 | 8   | 289 | 2.32e-142 | 390  |
| Ath AT1G71690.1    | AGM1 | 51.174  | 213 | 102 | 2  | 70  | 281 | 62  | 273 | 2.63e-80  | 233  |
| Ath AT1G71690.1    | AGM2 | 45.385  | 260 | 136 | 5  | 38  | 294 | 35  | 291 | 1.42e-78  | 229  |
| Ath AT1G33800.1    | AGM2 | 49.784  | 231 | 107 | 4  | 67  | 289 | 62  | 291 | 9.91e-81  | 234  |
| Ath AT1G33800.1    | AGM1 | 52.511  | 219 | 99  | 4  | 70  | 284 | 62  | 279 | 5.86e-78  | 227  |
| Ath AT1G09610.1    | AGM2 | 51.786  | 224 | 103 | 5  | 62  | 281 | 69  | 291 | 7.58e-81  | 234  |
| Ath AT1G09610.1    | AGM1 | 52.133  | 211 | 92  | 3  | 62  | 266 | 66  | 273 | 5.14e-80  | 232  |
| Ath AT4G24910.1    | AGM2 | 29.831  | 295 | 187 | 5  | 26  | 307 | 4   | 291 | 1.80e-42  | 136  |
| Ath AT4G24910.1    | AGM1 | 35.238  | 210 | 125 | 5  | 105 | 307 | 84  | 289 | 1.04e-40  | 132  |
| Ath AT3G50220.1    | AGM2 | 34.768  | 302 | 165 | 12 | 21  | 310 | 10  | 291 | 6.03e-48  | 151  |
| Ath AT3G50220.1    | AGM1 | 37.229  | 231 | 130 | 7  | 89  | 310 | 65  | 289 | 7.55e-48  | 150  |
| Ath AT1G27930.1    | AGM1 | 100.000 | 289 | 0   | 0  | 1   | 289 | 1   | 289 | 0.0       | 600  |
| Ath AT1G27930.1    | AGM2 | 69.258  | 283 | 80  | 5  | 8   | 289 | 15  | 291 | 1.44e-145 | 399  |
| Ath AT4G09990.1    | AGM2 | 44.706  | 255 | 129 | 2  | 22  | 272 | 32  | 278 | 3.71e-79  | 230  |
| Ath AT4G09990.1    | AGM1 | 51.887  | 212 | 99  | 3  | 68  | 276 | 67  | 278 | 1.19e-75  | 221  |
| Ath AT5G67210.1    | AGM2 | 34.932  | 292 | 172 | 9  | 20  | 303 | 10  | 291 | 8.08e-52  | 161  |
| Ath AT5G67210.1    | AGM1 | 36.199  | 221 | 134 | 5  | 82  | 300 | 65  | 280 | 3.68e-48  | 151  |
| Cbr GBG71883.1     | AGM2 | 31.395  | 172 | 82  | 5  | 166 | 315 | 102 | 259 | 4.28e-23  | 85.1 |
| Cbr GBG71883.1     | AGM1 | 30.994  | 171 | 83  | 5  | 166 | 315 | 99  | 255 | 6.38e-21  | 79.0 |
| Cbr GBG71887.1     | AGM1 | 29.825  | 171 | 85  | 4  | 153 | 302 | 99  | 255 | 4.98e-21  | 79.0 |
| Cbr GBG71887.1     | AGM2 | 30.058  | 173 | 83  | 6  | 153 | 302 | 102 | 259 | 3.13e-19  | 73.9 |
| Smu SM000088S23775 | AGM2 | 38.830  | 188 | 98  | 5  | 10  | 193 | 19  | 193 | 1.07e-35  | 115  |
| Smu SM000088S23775 | AGM1 | 43.846  | 130 | 65  | 3  | 66  | 193 | 66  | 189 | 2.05e-30  | 101  |
| Smu SM000247S08301 | AGM2 | 38.830  | 188 | 98  | 5  | 10  | 193 | 19  | 193 | 1.61e-35  | 114  |
| Smu SM000247S08301 | AGM1 | 42.308  | 130 | 67  | 3  | 66  | 193 | 66  | 189 | 3.04e-29  | 98.2 |
| Smu SM000302S11676 | AGM2 | 38.298  | 188 | 99  | 5  | 10  | 193 | 19  | 193 | 6.69e-35  | 112  |
| Smu SM000302S11676 | AGM1 | 43.077  | 130 | 66  | 3  | 66  | 193 | 66  | 189 | 1.43e-29  | 99.0 |

blastp

Tree scale: 1

bootstrap

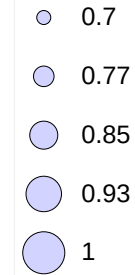

Colored ranges

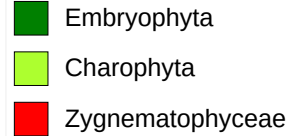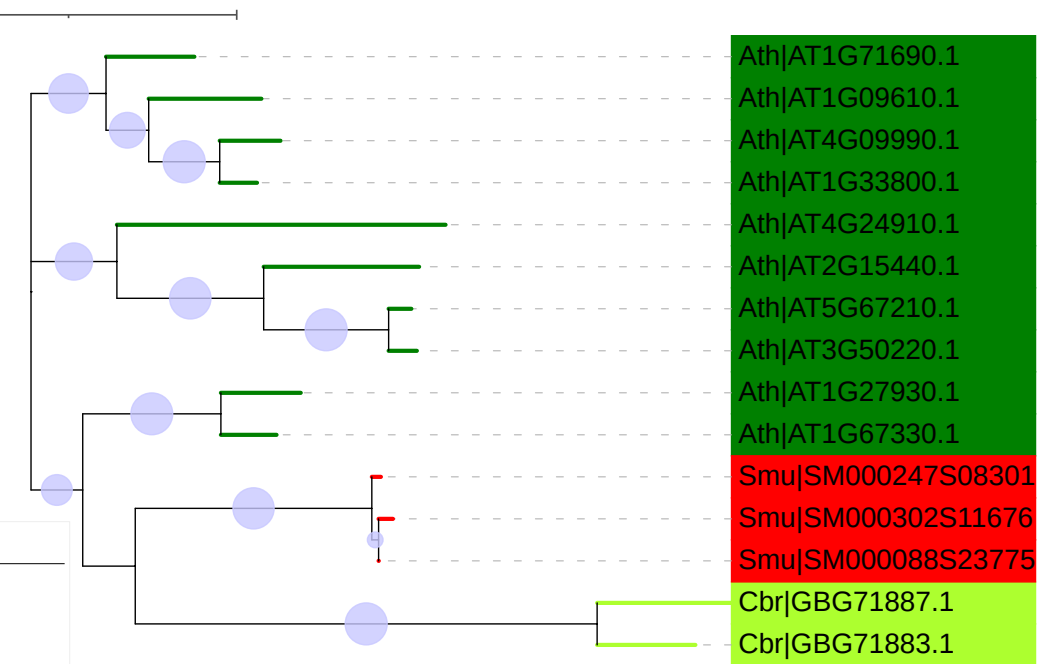

<https://itol.embl.de/tree/134238191141230141690854677>

See the NR phylogeny in Data S1-40

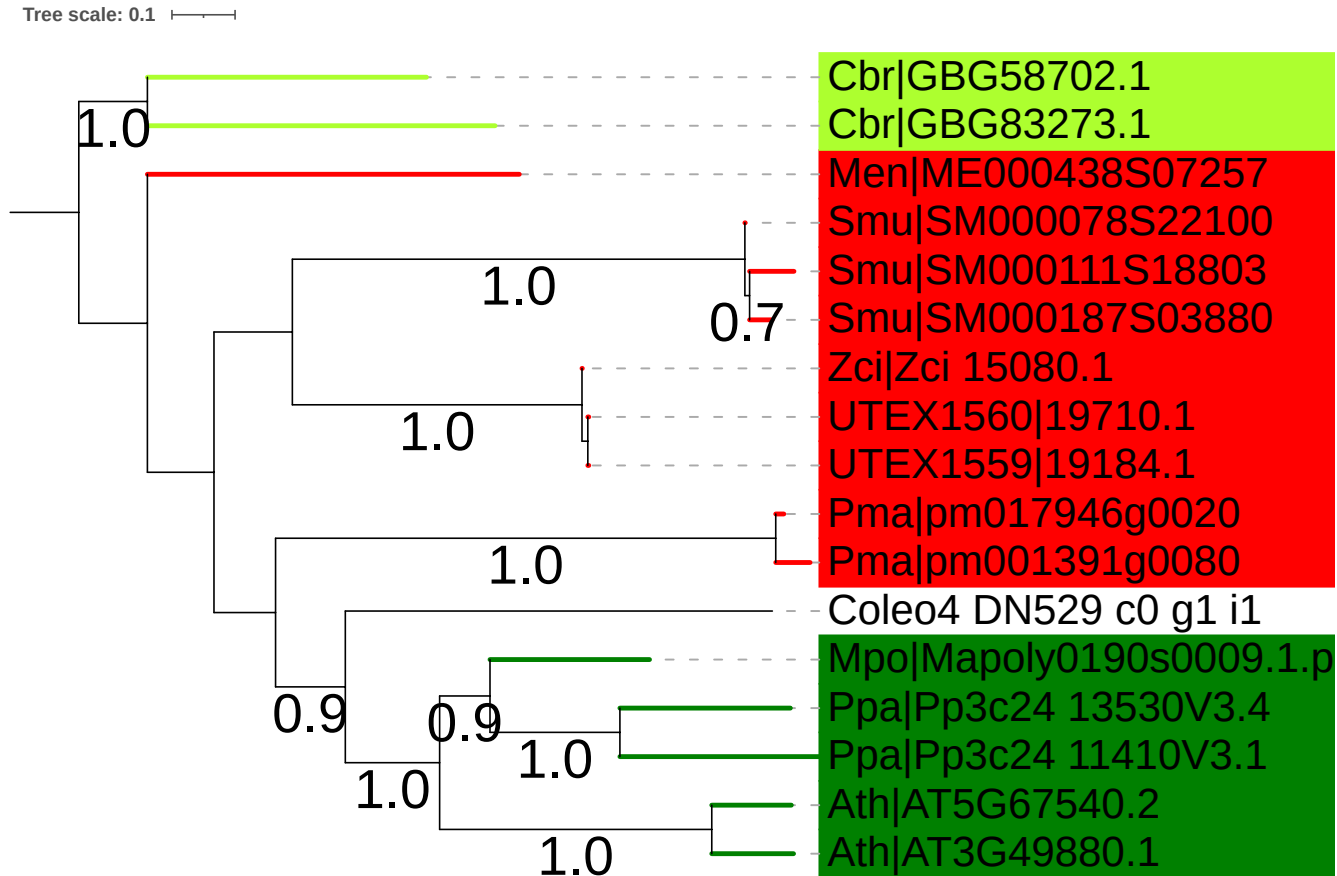

## GH43\_24 + Coleochaete

GH43A (AT5G67540)

GH43B (AT3G49880)

exo- $\beta$ -1,3-galactosidase activity of GH43 enzymes:  
hampered by  $\beta$ -1,6 branches on  $\beta$ -1,3-galactans.

Nibbering P, Petersen BL, Motawia MS, Jørgensen B, Ulvskov P, Niittyä T. Golgi-localized exo- $\beta$ 1,3-galactosidases involved in cell expansion and root growth in Arabidopsis. J Biol Chem. 2020 Jul 31;295(31):10581-10592. doi: 10.1074/jbc.RA120.013878.

# GH43\_24 nr

**Arabidopsis GH43\_24:**  
involved in AGP backbone  
degradation

**GH43\_24: exo-b-1,3-galactanase (EC  
3.2.1.145),** might be HGT from  
bacteria.

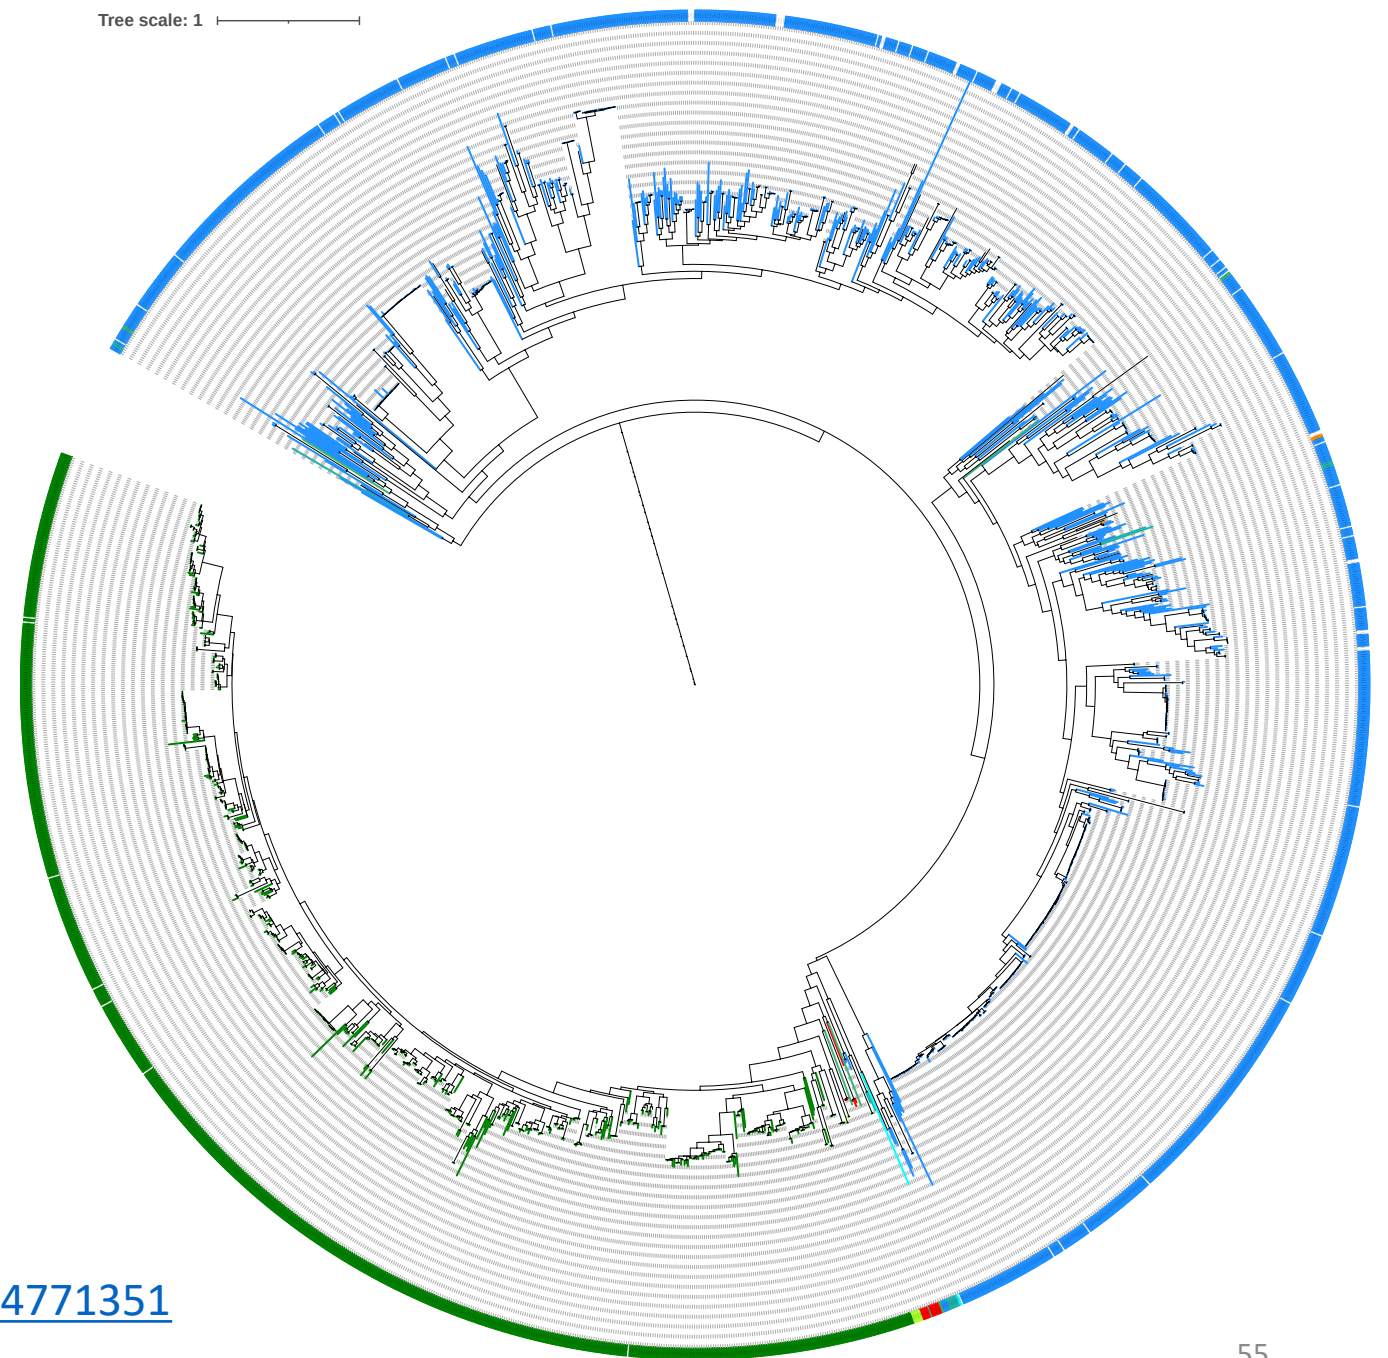

<https://itol.embl.de/tree/20812770255164771664771351>

# GH30\_5

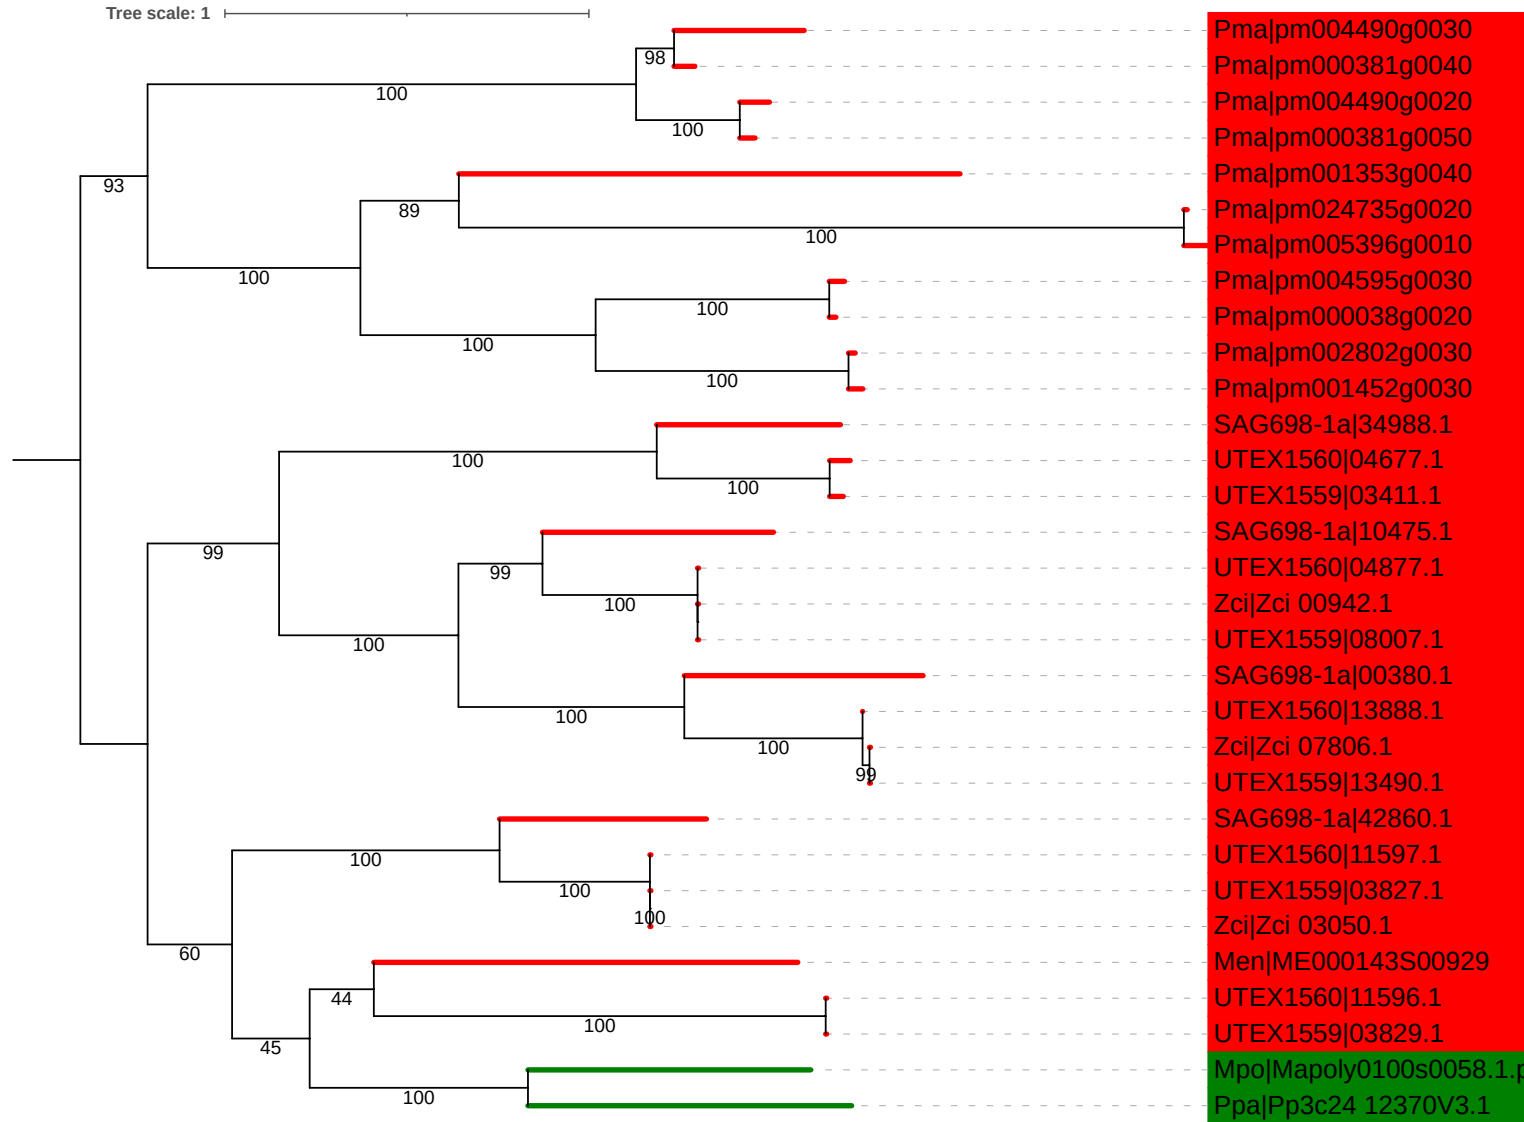

endo-b-1,6-galactanase (EC 3.2.1.164); galactan exo-1,6-b-galactobiohydrolase (non-reducing end) (EC 3.2.1.213)

No Coleochaete



# Data S1-54

## GH30\_5

Tree scale: 1

- Embryophyta
- Zygnematophyceae
- Fungi
- Bacteria

## Zygnematophyceae

*Z. circumcarinatum*  
*M. endlicherianum*  
*P. margaritaceum*

## Bacteria

Firmicutes

## Glomeromycota

*Gigaspora rosea*

## Embryophyta

*M. polymorpha*  
*P. patens*

## Bacteria

Fibrobacteres  
 Firmicutes  
 Proteobacteria

## Bacteria

Bacteroidetes

Zci gene expression: log10

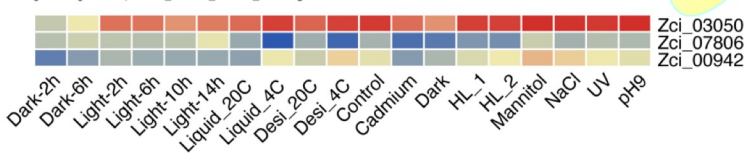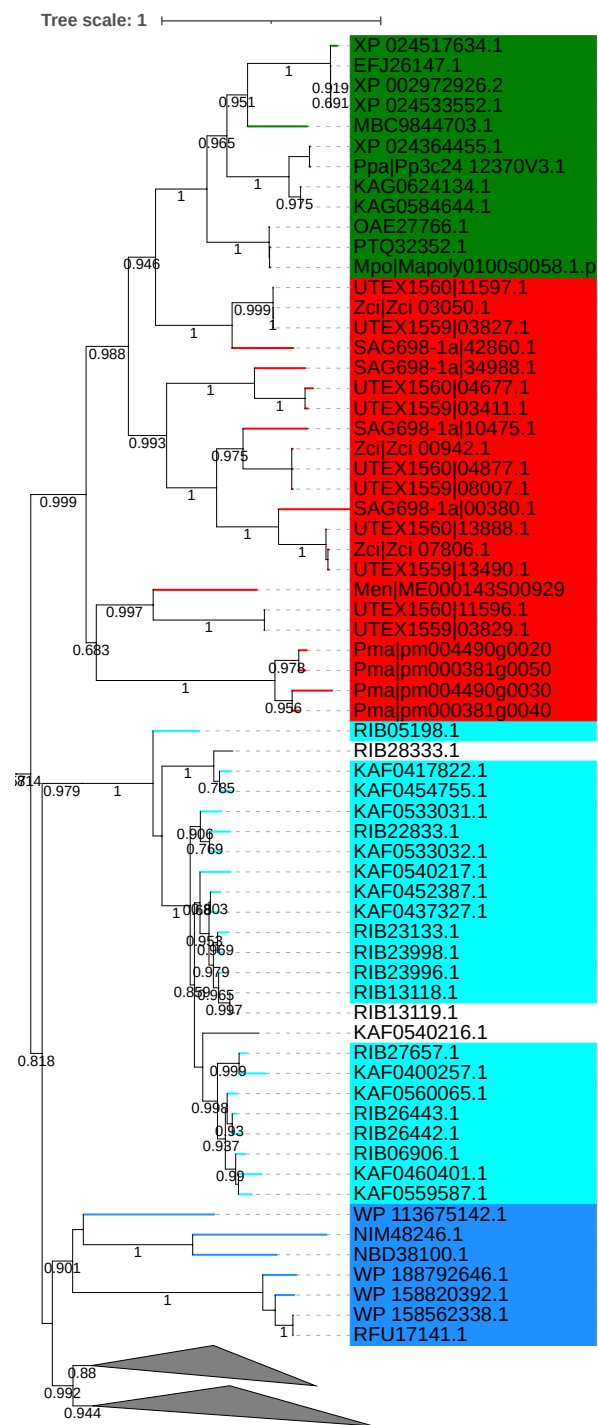

# GH35

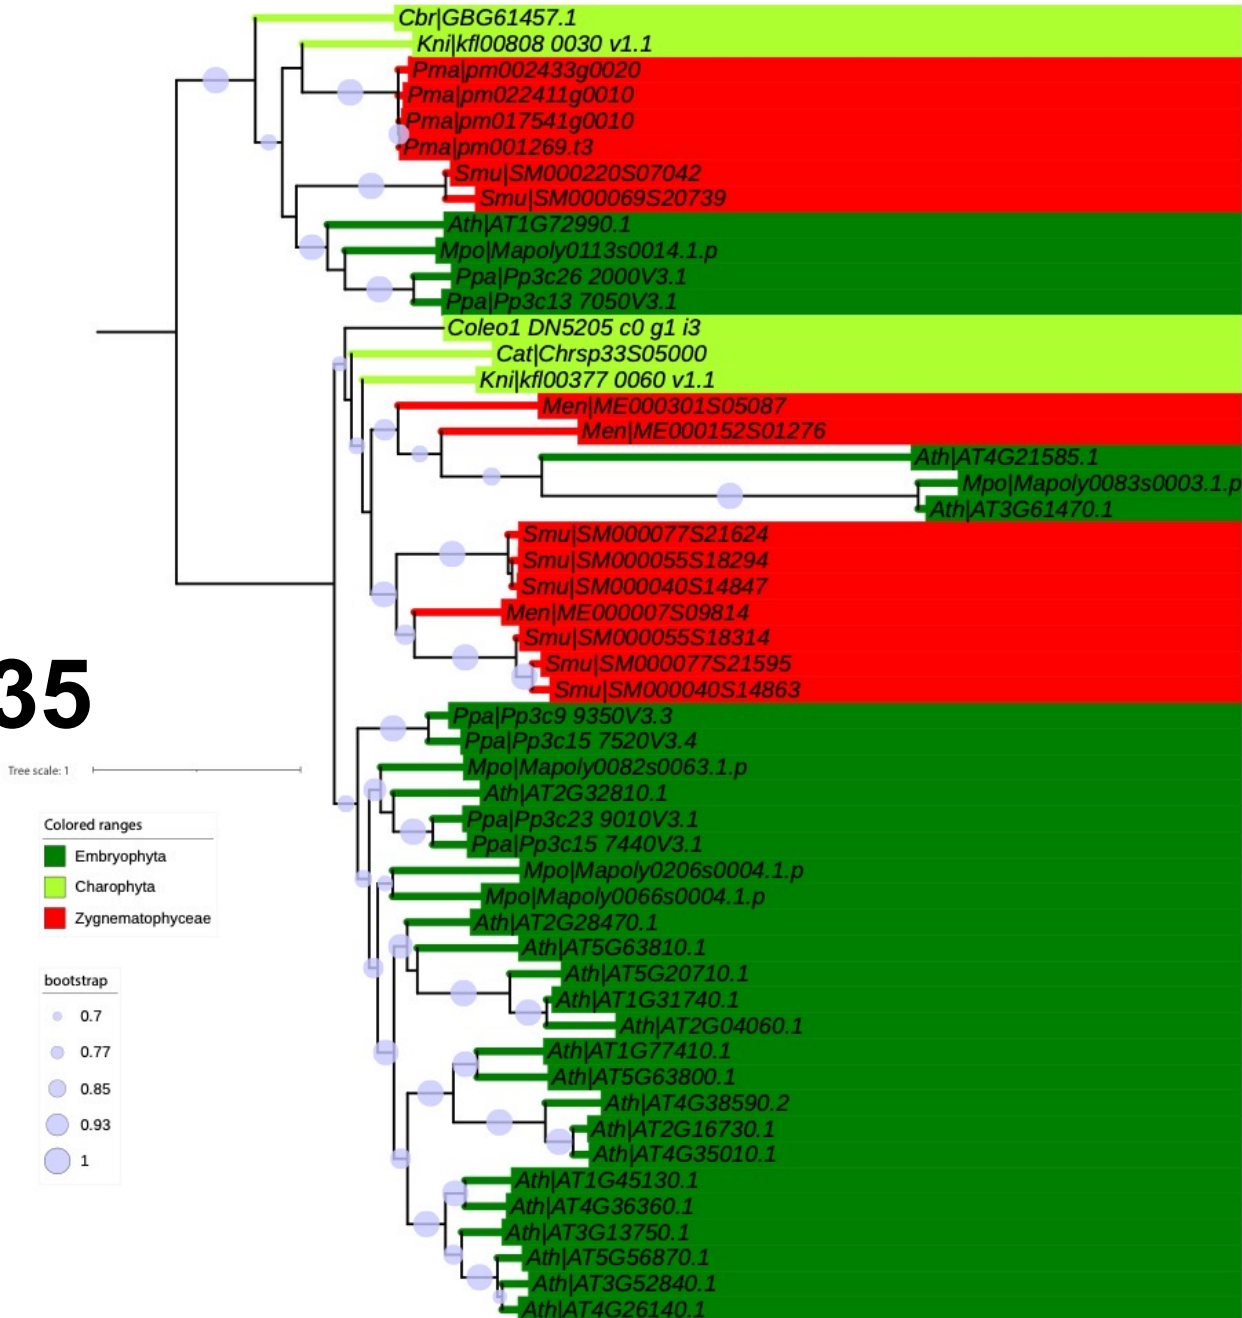

AT3G61470 (LHCA2): photosystem I light harvesting complex gene 2

AT4G21585 (ENDO4): Endonuclease 4

BGAL8 (AT3G28470)

BGAL10 (AT5g63810)

Kotake T, Dina S, Konishi T, Kaneko S, Igarashi K, Samejima M, Watanabe Y, Kimura K, Tsumuraya Y. Molecular cloning of a {beta}-galactosidase from radish that specifically hydrolyzes {beta}-(1->3)- and {beta}-(1->6)-galactosyl residues of **Arabinogalactan** protein. *Plant Physiol.* 2005 Jul;138(3):1563-76. doi: 10.1104/pp.105.062562.

Sampedro et al. AtBGAL10 is the main **xyloglucan**  $\beta$ -galactosidase in Arabidopsis, and its absence results in unusual xyloglucan subunits and growth defects. *Plant Physiol.* 2012 Mar;158(3):1146-57. doi: 10.1104/pp.111.192195.

# Data S1-56

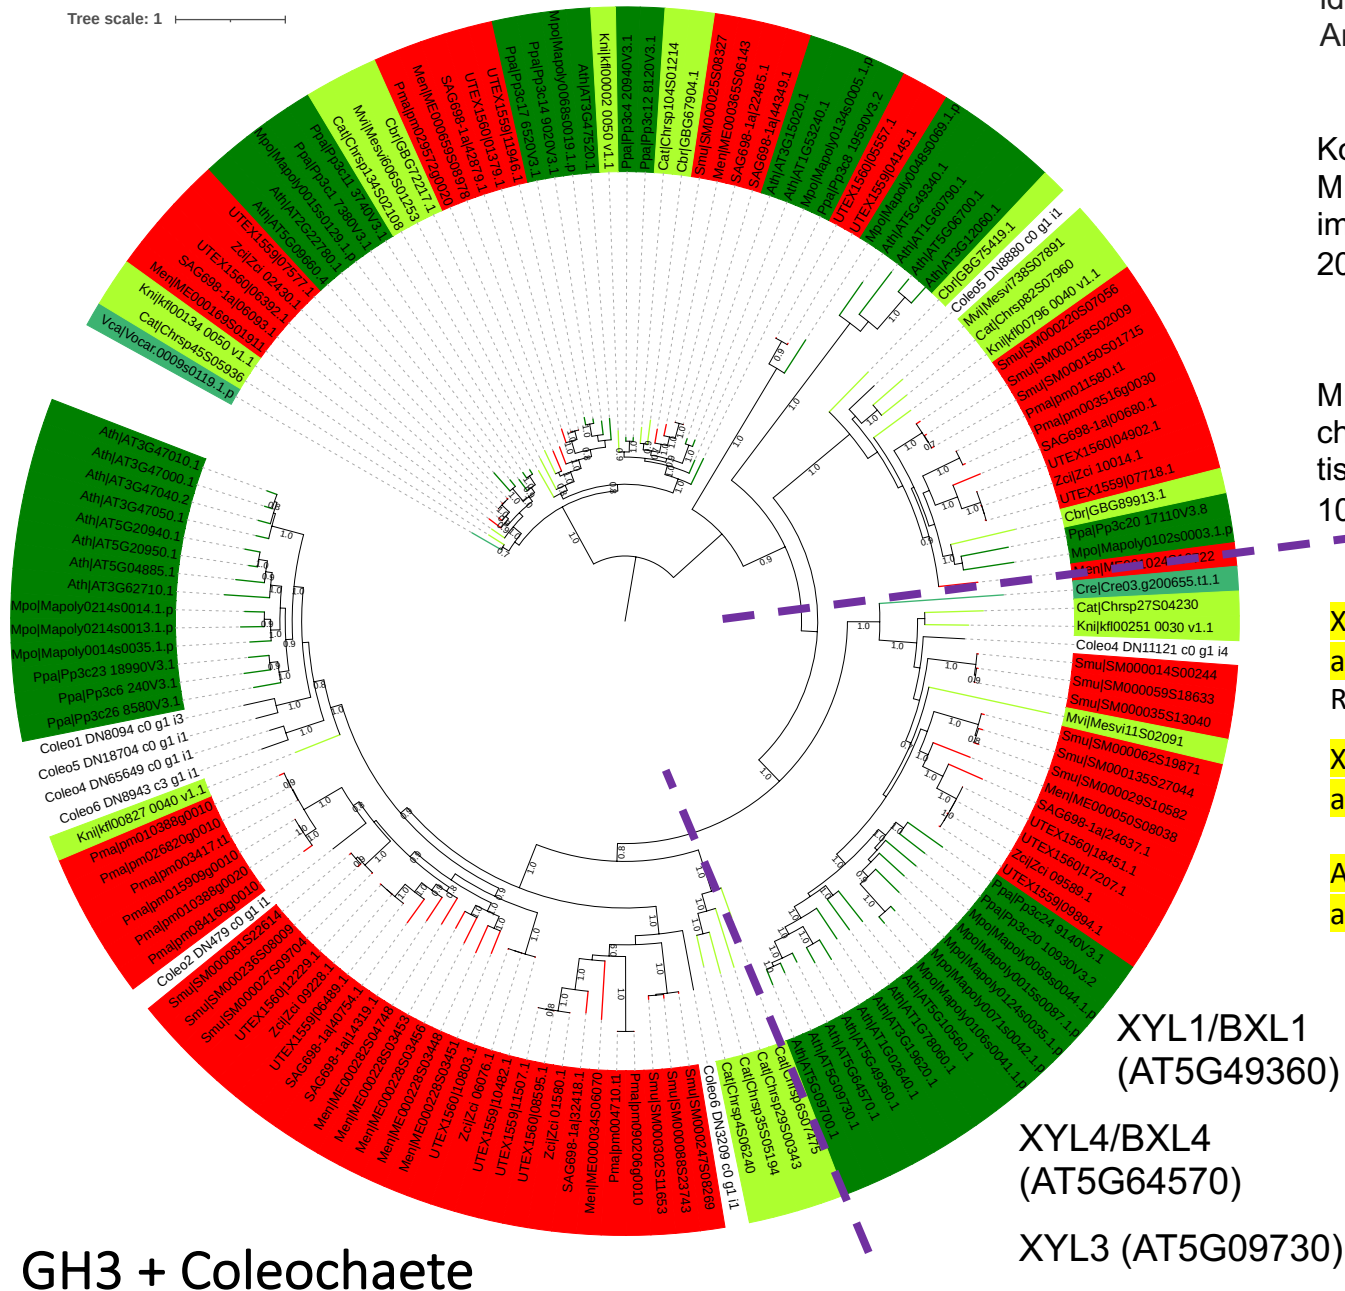

Minic et al. Purification, functional characterization, cloning, and identification of mutants of a seed-specific arabinan hydrolase in *Arabidopsis*. *J Exp Bot.* 2006;57(10):2339-51. doi: 10.1093/jxb/erj205.

Kotake T, Tsuchiya K, Aohara T, Konishi T, Kaneko S, Igarashi K, Samejima M, Tsumuraya Y. An alpha-L-arabinofuranosidase/beta-D-xylosidase from immature seeds of radish (*Raphanus sativus* L.). *J Exp Bot.* 2006;57(10):2353-62. doi: 10.1093/jxb/erj206.

Minic Z, Rihouey C, Do CT, Lerouge P, Jouanin L. Purification and characterization of enzymes exhibiting beta-D-xylosidase activities in stem tissues of *Arabidopsis*. *Plant Physiol.* 2004 Jun;135(2):867-78. doi: 10.1104/pp.104.041269.

**XYL3:** releases L-arabinose from (1-->5)-alpha-L-arabinofuranobiose, arabinoxylan, sugar beet arabinan, and debranched arabinan. RG-I side chain degradation

**XYL4:** mainly D-Xyl from oat spelt xylan, rye arabinoxylan, wheat arabinoxylan, and oligoarabinoxylans.

**ARAF and XYL1:** also release D-Xyl; can further release L-Ara from arabinoxylans and arabinan

**AtBXL1:** putative bifunctional beta-d-xylosidase/alpha-l-arabinofuranosidase; implicated as a beta-d-xylosidase in vascular development.

**GH3:** hydrolytic activity on AGPs, pectic alpha-1,5-arabinan and arabinoxylan.

**RsAraf1** from *R. sativus* immature seeds encodes an alpha-arabinofuranosidase in the GH3 family. When expressed in *Arabidopsis*, **RsAraf1** hydrolyzed alpha-arabinofuranosyl residues of AGPs (Kotake et al., 2006)

Data S1-57

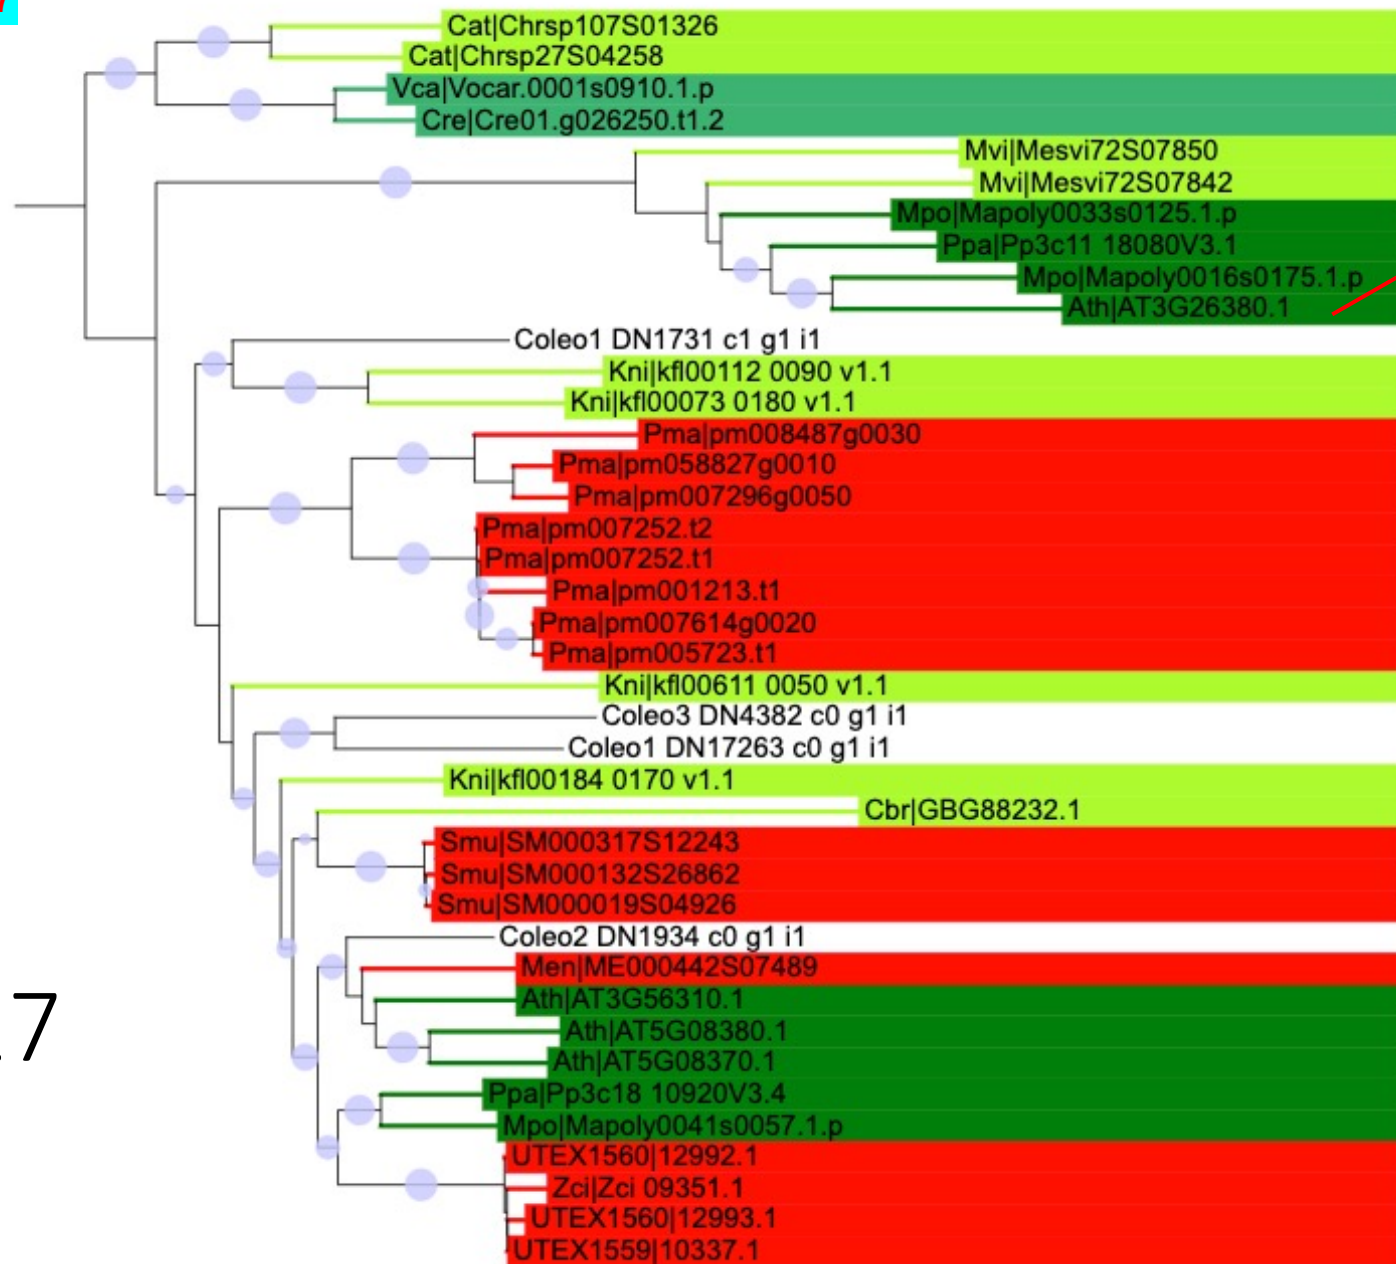

**APSE**  
**(AT3G26380)**

APSE and AGALs: contributions in hydrolysis of  $\beta$ -l-Arap residues of pectic  $\alpha$ -1,3:1,5-arabinan & type I AG.

In Arabidopsis AGPs:  $\beta$ -l-Arap residues are hydrolysed mainly by APSE and partially by AGALs.

Imaizumi et al. Heterologous expression and characterization of an Arabidopsis  $\beta$ -l-arabinopyranosidase and  $\alpha$ -d-galactosidases acting on  $\beta$ -l-arabinopyranosyl residues. J Exp Bot. 2017 Jul 20;68(16):4651-4661. doi: 10.1093/jxb/erx279.

AGAL1 (AT5G08380)  
AGAL2 (AT5G08370)  
AGAL3 (AT3G56310)

GH27

<https://itol.embl.de/tree/208127240222424791665201864>

APSE: HGT from bacteria

GH27 nr

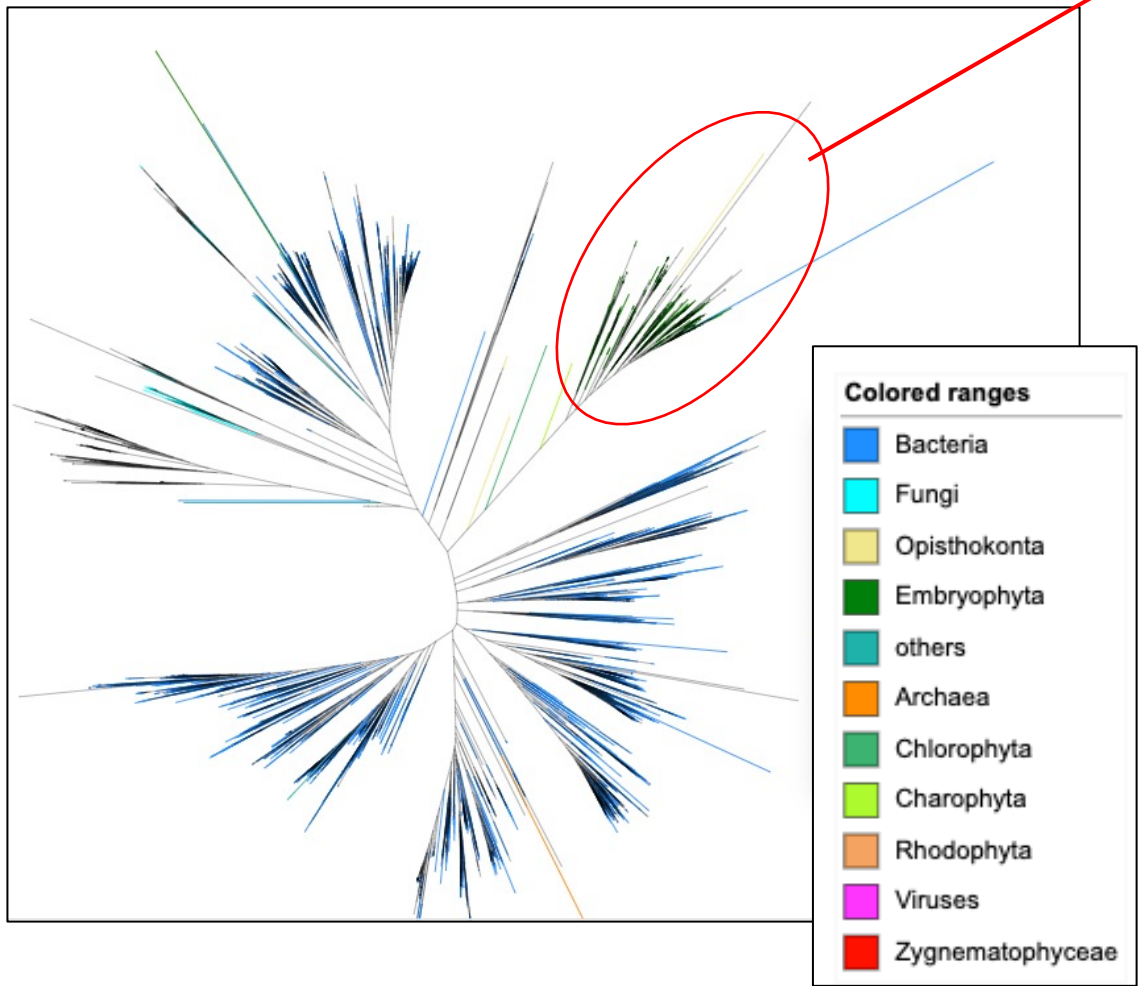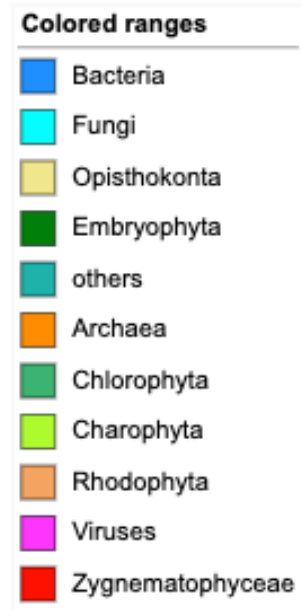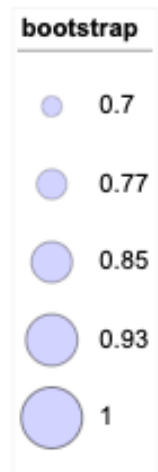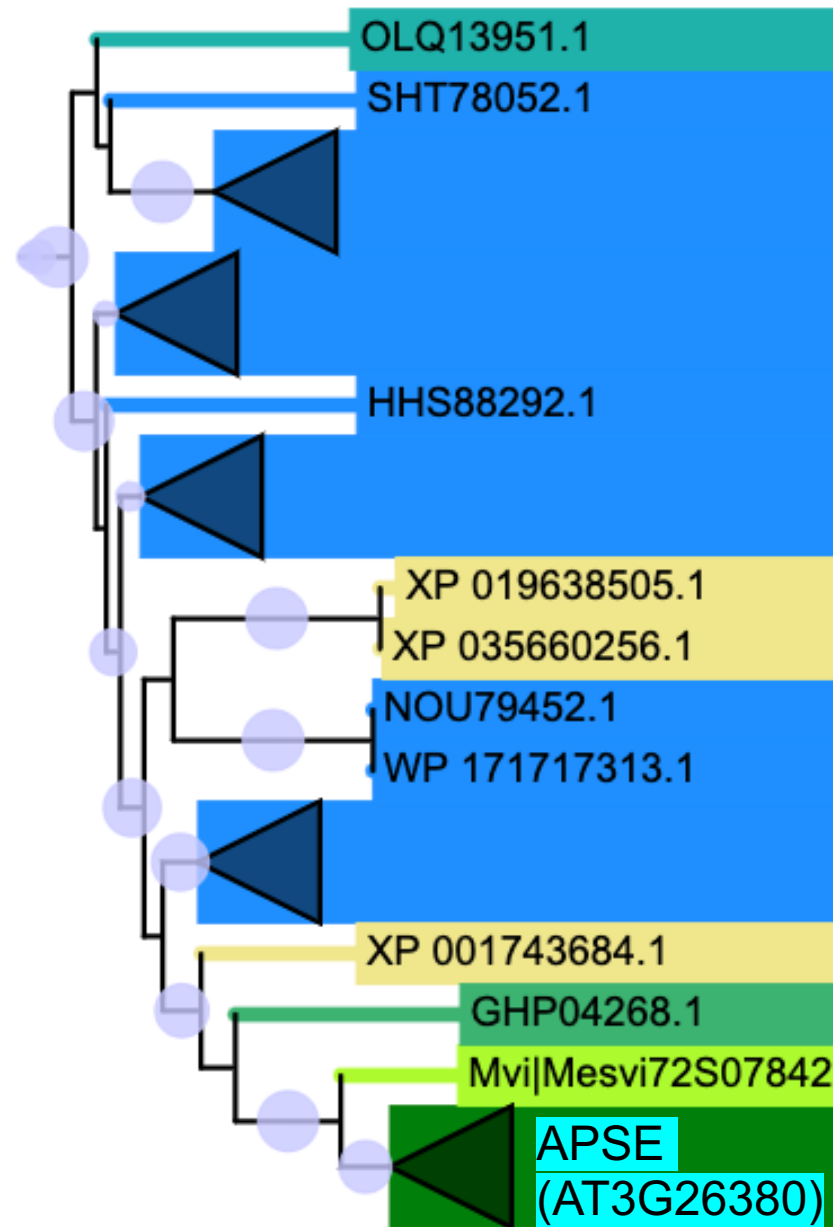

## Data S1-59

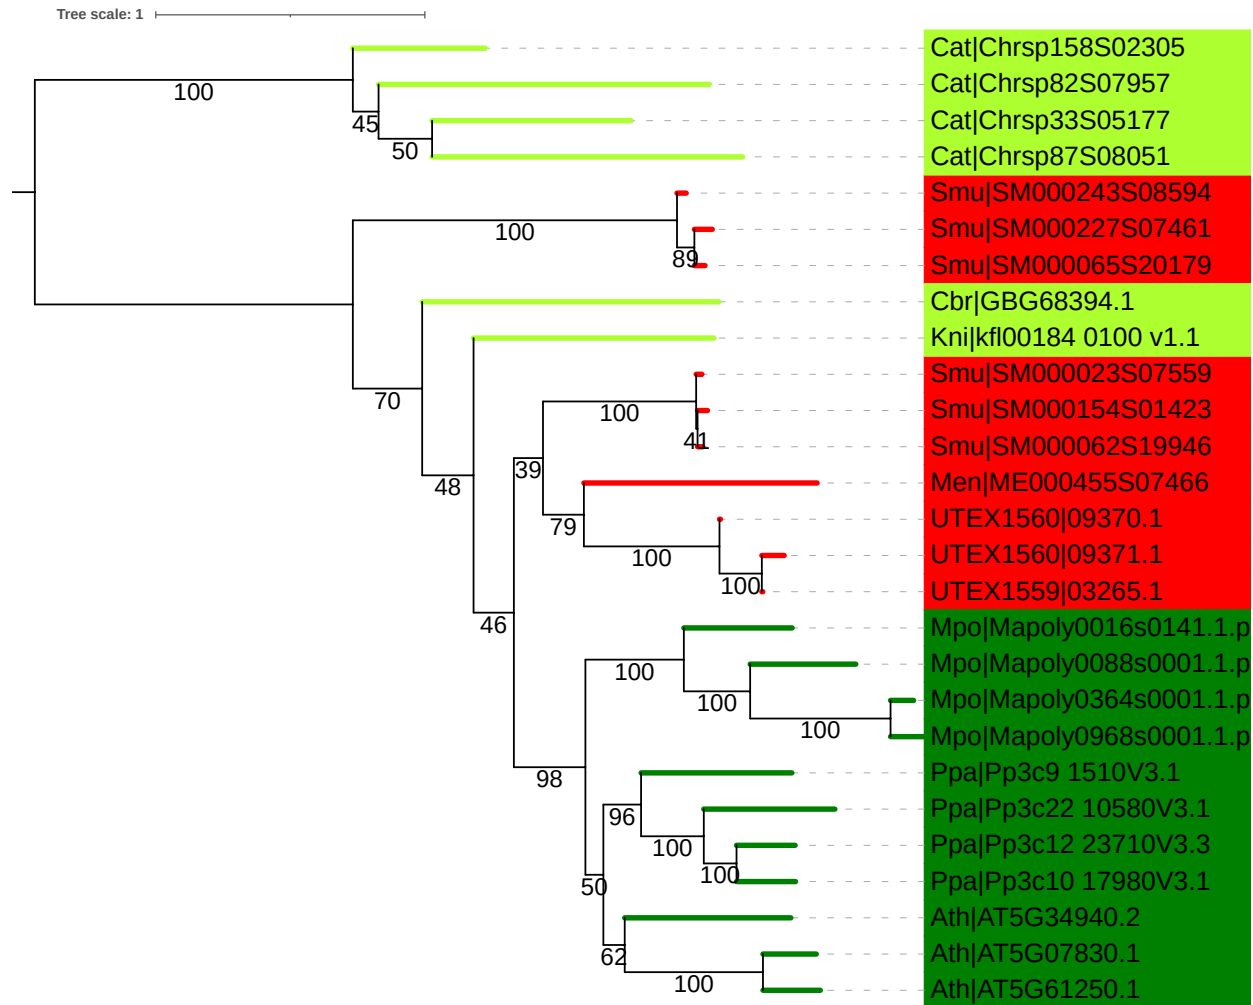

# GH79

Eudes, A., Mouille, G., Thévenin, J., Goyallon, A., Minic, Z., and Jouanin, L. (2008). Purification, cloning and functional characterization of an endogenous beta-glucuronidase in *Arabidopsis thaliana*. *Plant Cell Physiol.* 49, 1331–1341. doi: 10.1093/pcp/pcn108

AtGUS1 (AT5G61250)

AtGUS2 (AT5G07830)

AtGUS3 (AT5G34940)

No GH79 was found in the Coleochaete transcriptome sequences.

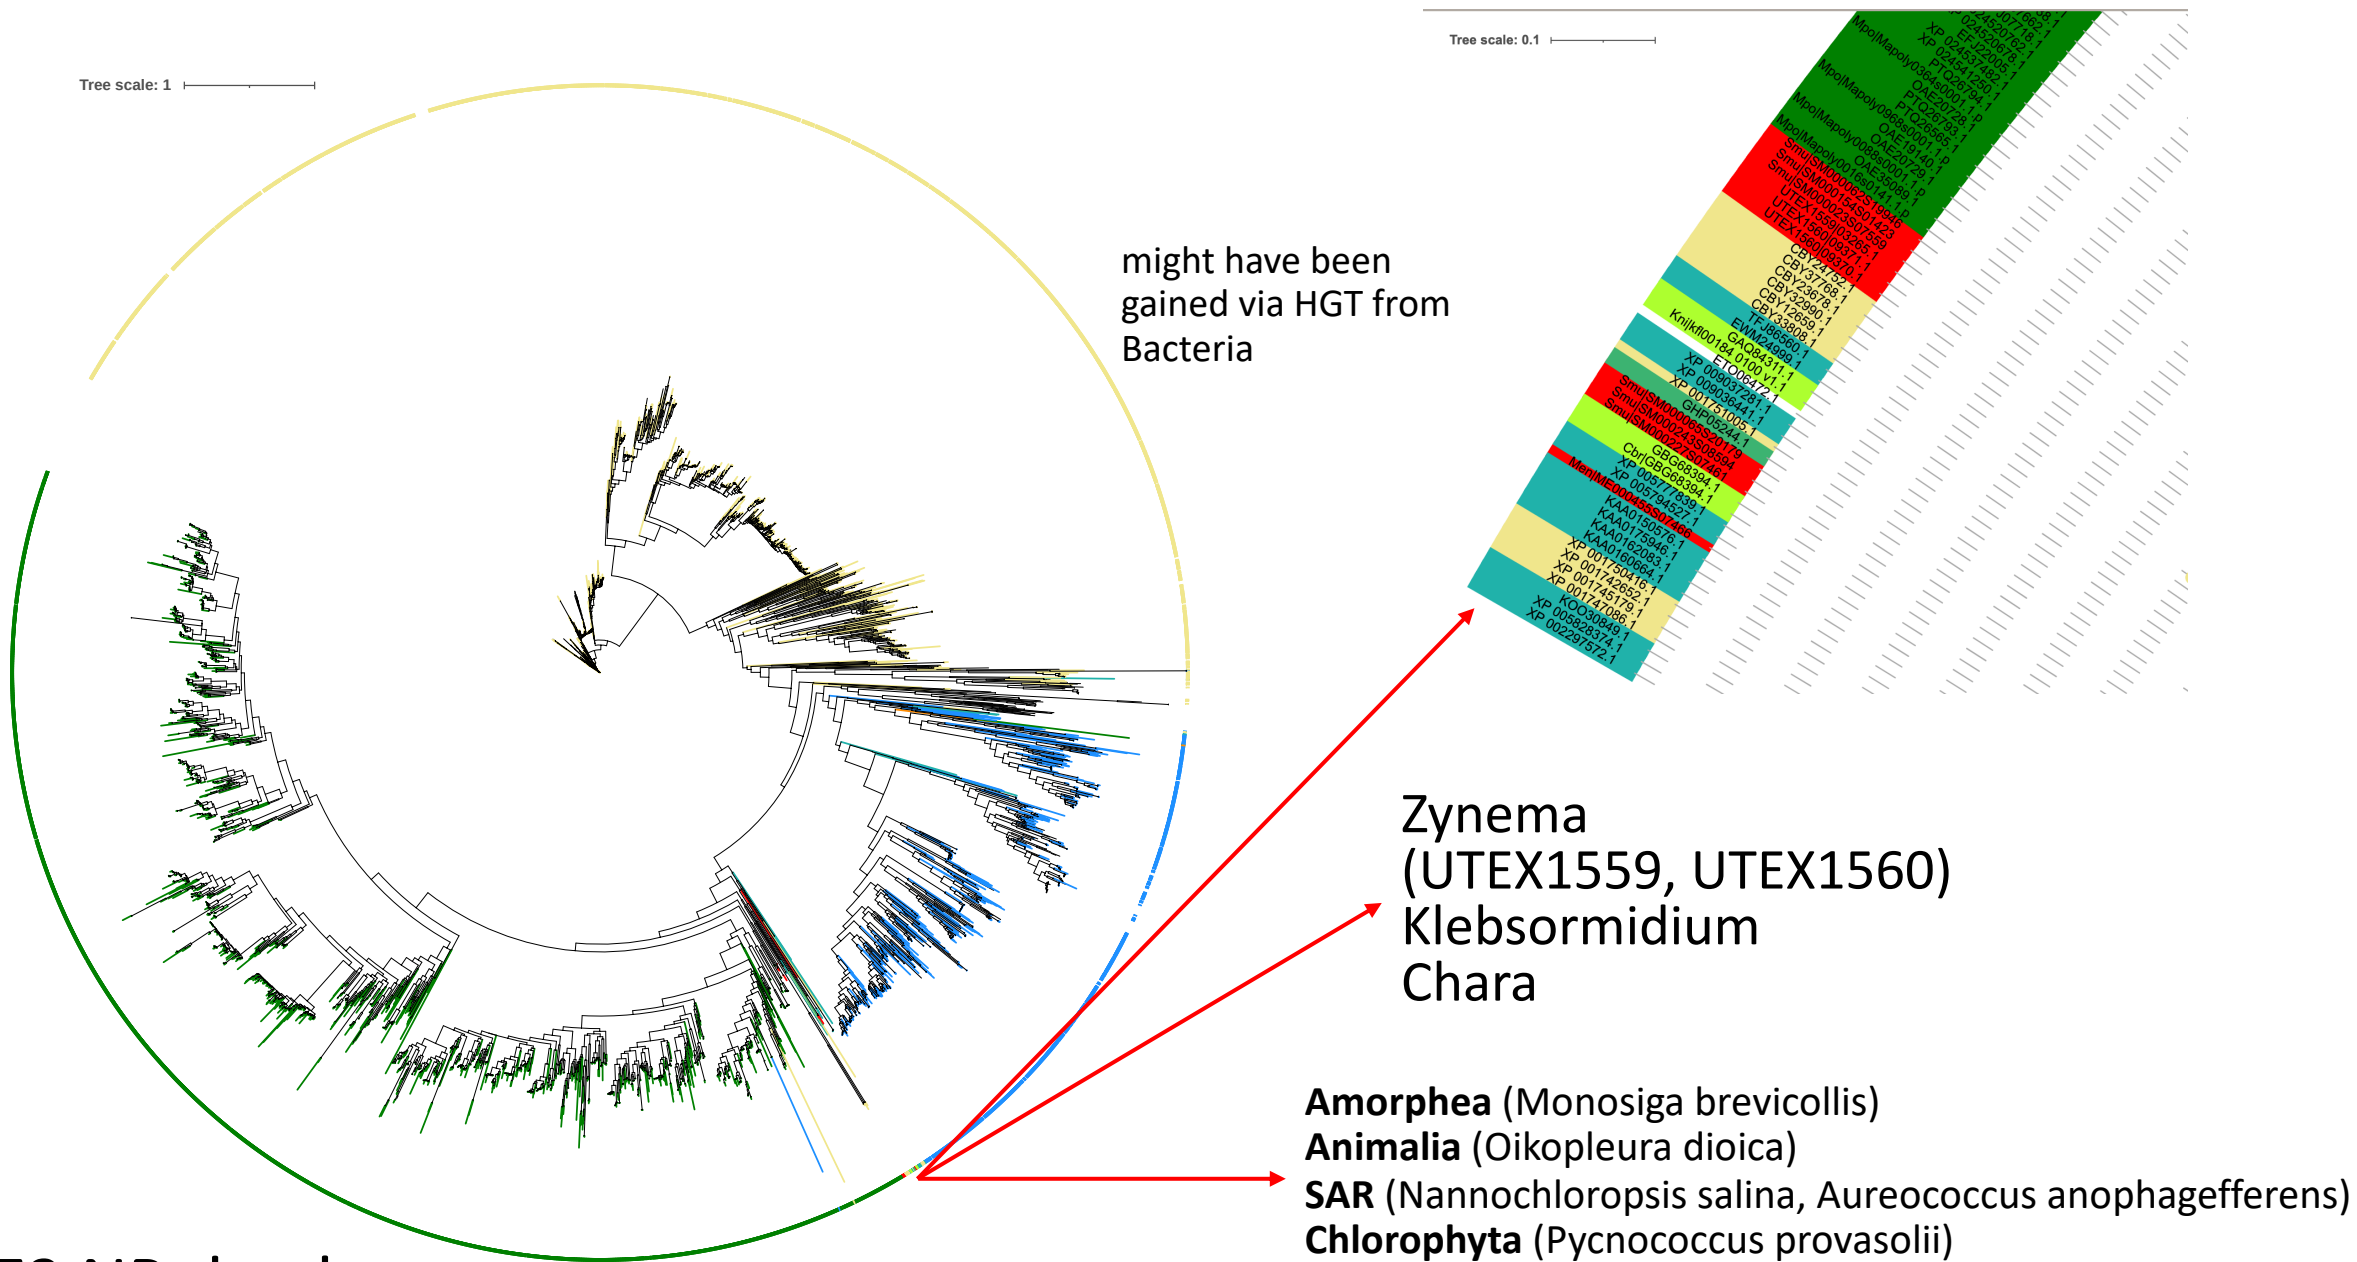

# Homogalacturonan (HG)

## HG

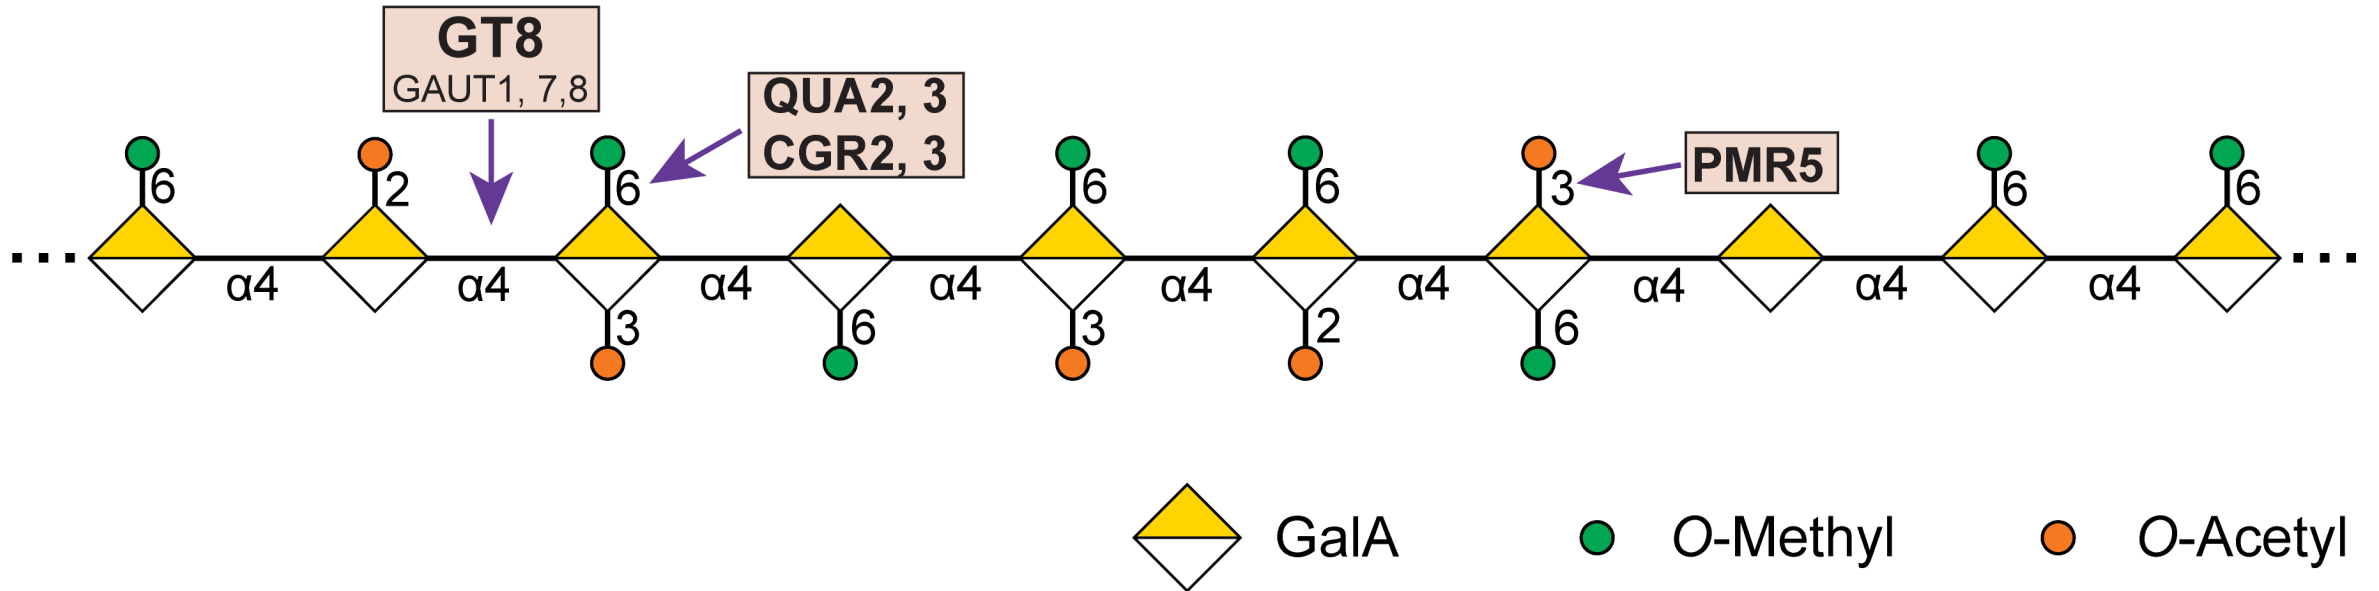



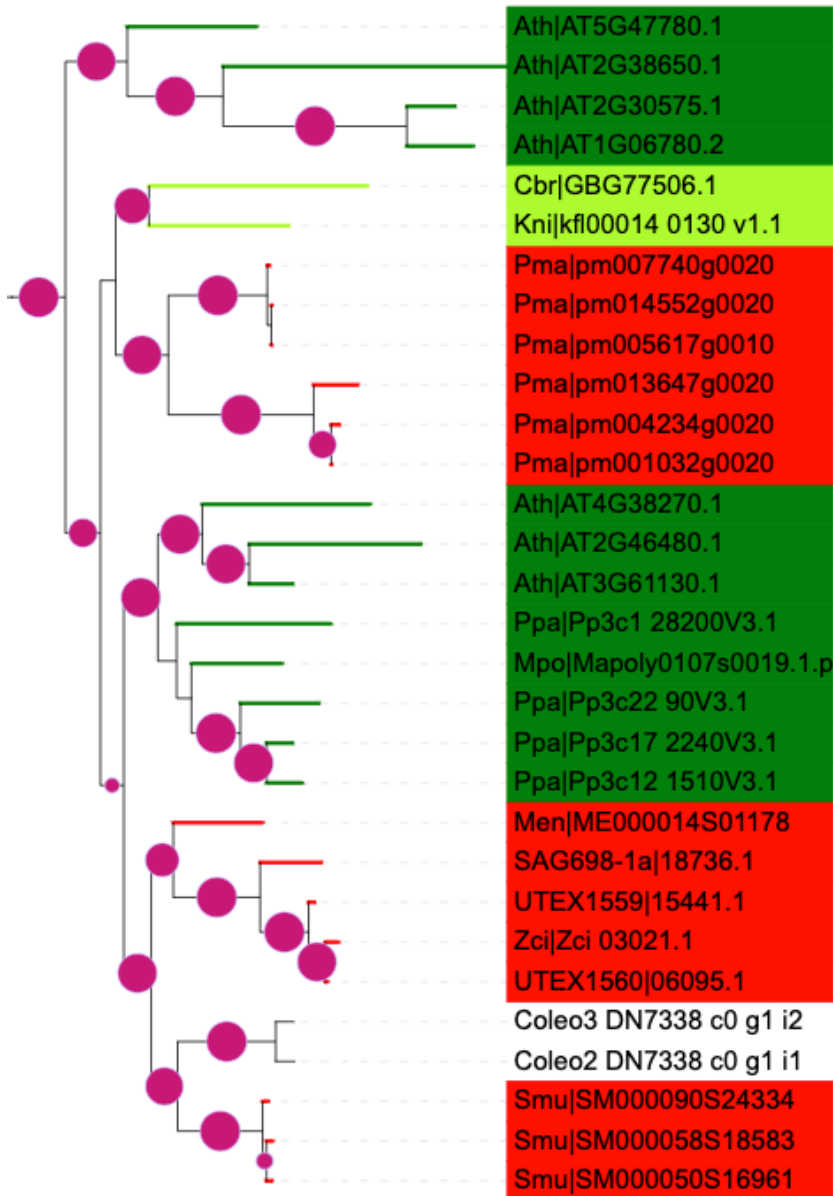**GAUT6** (AT1G06780)**GAUT5** (AT2G30575)**GAUT7** (AT2G38650)**GAUT4** (AT5G47780)**GAUT1** (AT3G61130)**GAUT2** (AT2G46480)**GAUT3** (AT4G38270)

Atmodjo et al. Galacturonosyltransferase (GAUT)1 and GAUT7 are the core of a plant cell wall pectin biosynthetic homogalacturonan:galacturonosyltransferase complex. *Proc Natl Acad Sci U S A.* 2011 Dec 13;108(50):20225-30. doi: 10.1073/pnas.1112816108.

Sterling et al. Functional identification of an Arabidopsis pectin biosynthetic homogalacturonan galacturonosyltransferase. *Proc Natl Acad Sci U S A.* 2006 Mar 28;103(13):5236-41. doi: 10.1073/pnas.0600120103.

Bouton et al. QUASIMODO1 encodes a putative membrane-bound glycosyltransferase required for normal pectin synthesis and cell adhesion in Arabidopsis. *Plant Cell.* 2002 Oct;14(10):2577-90. doi: 10.1105/tpc.004259.

**GAUT8** (QUA1, AT3G25140)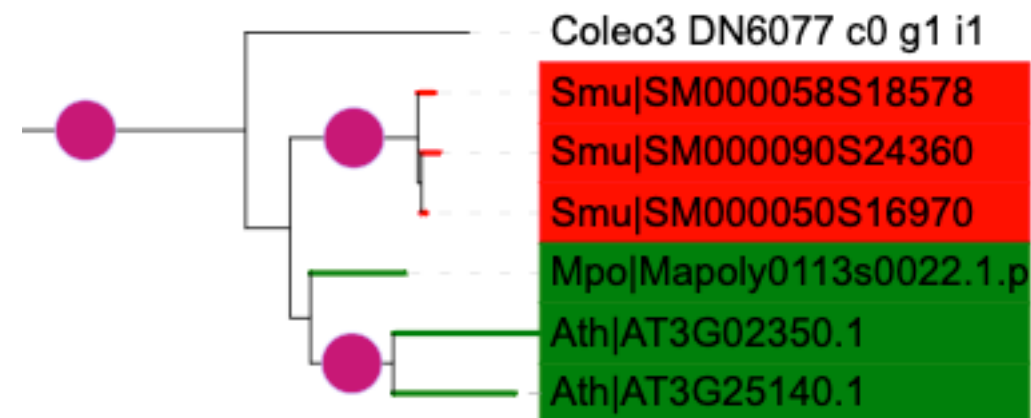

# QUA2 (AT1G78240)

Blast with 16genome + Coleochaete

HG: methylesterified by QUA2, QUA3 and GGR3

QUA2 might have been present in the LCA of Phragmoplastophyta

QUA3 (AT4G00740) might have first emerged in the LCA of Zygnematophyceae and Embryophyta

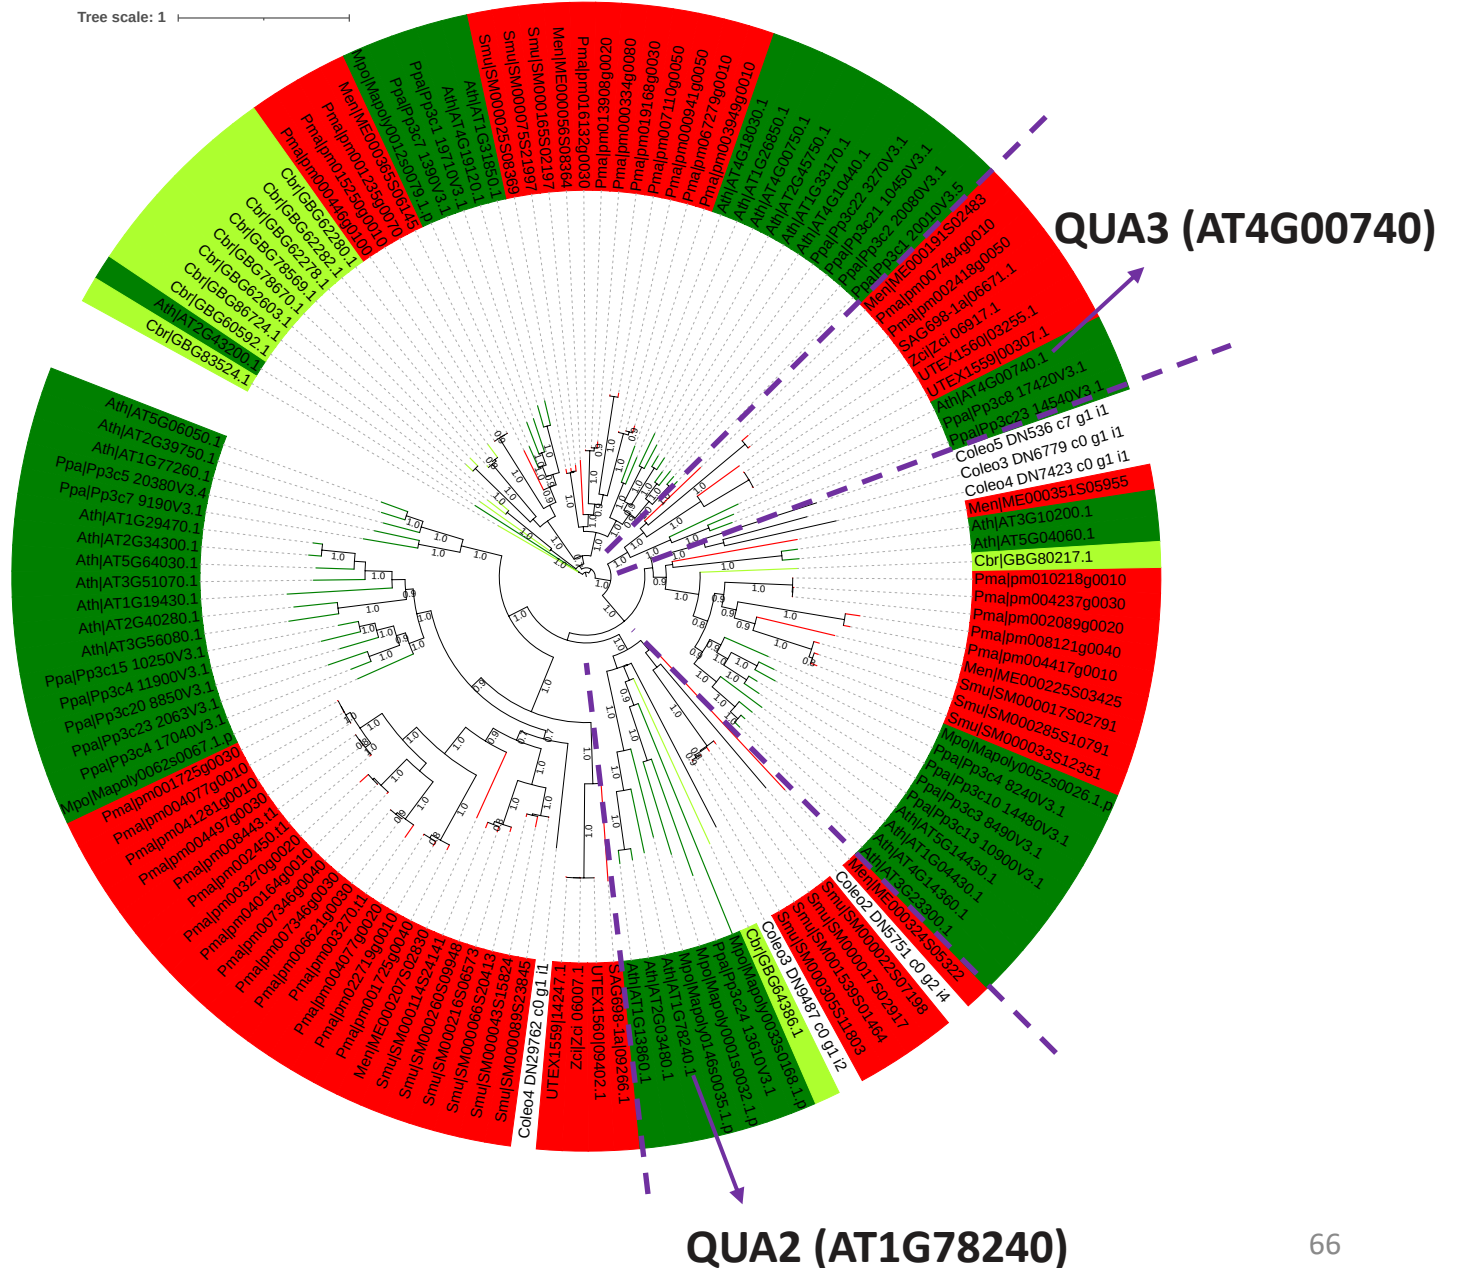

Kim SJ, Held MA, Zemelis S, Wilkerson C, Brandizzi F. CGR2 and CGR3 have critical overlapping roles in pectin methylesterification and plant growth in *Arabidopsis thaliana*. *Plant J.* 2015 Apr;82(2):208-20. doi: 10.1111/tpj.12802.

## CGR2/3 homologs (evalue<1e-15)

|                         |                |         |     |     |   |    |     |     |     |           |      |
|-------------------------|----------------|---------|-----|-----|---|----|-----|-----|-----|-----------|------|
| Ath AT5G65810.1         | CGR2 AT3G49720 | 86.590  | 261 | 32  | 1 | 1  | 258 | 1   | 261 | 1.59e-174 | 469  |
| Ath AT3G49720.1         | CGR2 AT3G49720 | 100.000 | 261 | 0   | 0 | 1  | 261 | 1   | 261 | 0.0       | 534  |
| Cbr GBG71667.1          | CGR2 AT3G49720 | 30.075  | 133 | 91  | 2 | 60 | 190 | 94  | 226 | 2.26e-15  | 64.7 |
| Mpo Mapoly0082s0061.1.p | CGR2 AT3G49720 | 34.201  | 269 | 167 | 6 | 40 | 306 | 1   | 261 | 6.71e-49  | 151  |
| Mvi Mesvi21S04311       | CGR2 AT3G49720 | 27.174  | 184 | 119 | 8 | 70 | 243 | 48  | 226 | 1.58e-15  | 61.6 |
| Ppa Pp3c12_13990V3.1    | CGR2 AT3G49720 | 36.397  | 272 | 128 | 6 | 31 | 298 | 27  | 257 | 1.54e-55  | 168  |
| Coleo1_DN62522_c0_g1_i1 | CGR2 AT3G49720 | 29.487  | 78  | 55  | 0 | 12 | 89  | 149 | 226 | 1.55e-13  | 50.4 |

|                         |                |         |     |     |   |     |     |     |     |           |      |
|-------------------------|----------------|---------|-----|-----|---|-----|-----|-----|-----|-----------|------|
| Ath AT5G65810.1         | GGR3 AT5G65810 | 100.000 | 258 | 0   | 0 | 1   | 258 | 1   | 258 | 0.0       | 529  |
| Ath AT3G49720.1         | GGR3 AT5G65810 | 86.590  | 261 | 32  | 1 | 1   | 261 | 1   | 258 | 6.63e-174 | 469  |
| Cbr GBG71667.1          | GGR3 AT5G65810 | 29.927  | 137 | 94  | 2 | 56  | 190 | 87  | 223 | 2.20e-14  | 63.5 |
| Mpo Mapoly0082s0061.1.p | GGR3 AT5G65810 | 35.124  | 242 | 148 | 4 | 67  | 306 | 24  | 258 | 3.60e-49  | 153  |
| Mvi Mesvi21S04311       | GGR3 AT5G65810 | 30.827  | 133 | 89  | 3 | 114 | 243 | 91  | 223 | 1.86e-13  | 57.0 |
| Ppa Pp3c12_13990V3.1    | GGR3 AT5G65810 | 36.765  | 272 | 127 | 6 | 31  | 298 | 24  | 254 | 1.59e-59  | 180  |
| Coleo1_DN62522_c0_g1_i1 | GGR3 AT5G65810 | 29.487  | 78  | 55  | 0 | 12  | 89  | 146 | 223 | 8.25e-12  | 47.4 |

Tree scale: 1

# PMR5 (AT5G58600) BLAST with 16 genomes + Coleochaete

PMR5 (AT5G58600) might have been present in the LCA of Phragmoplastophyta

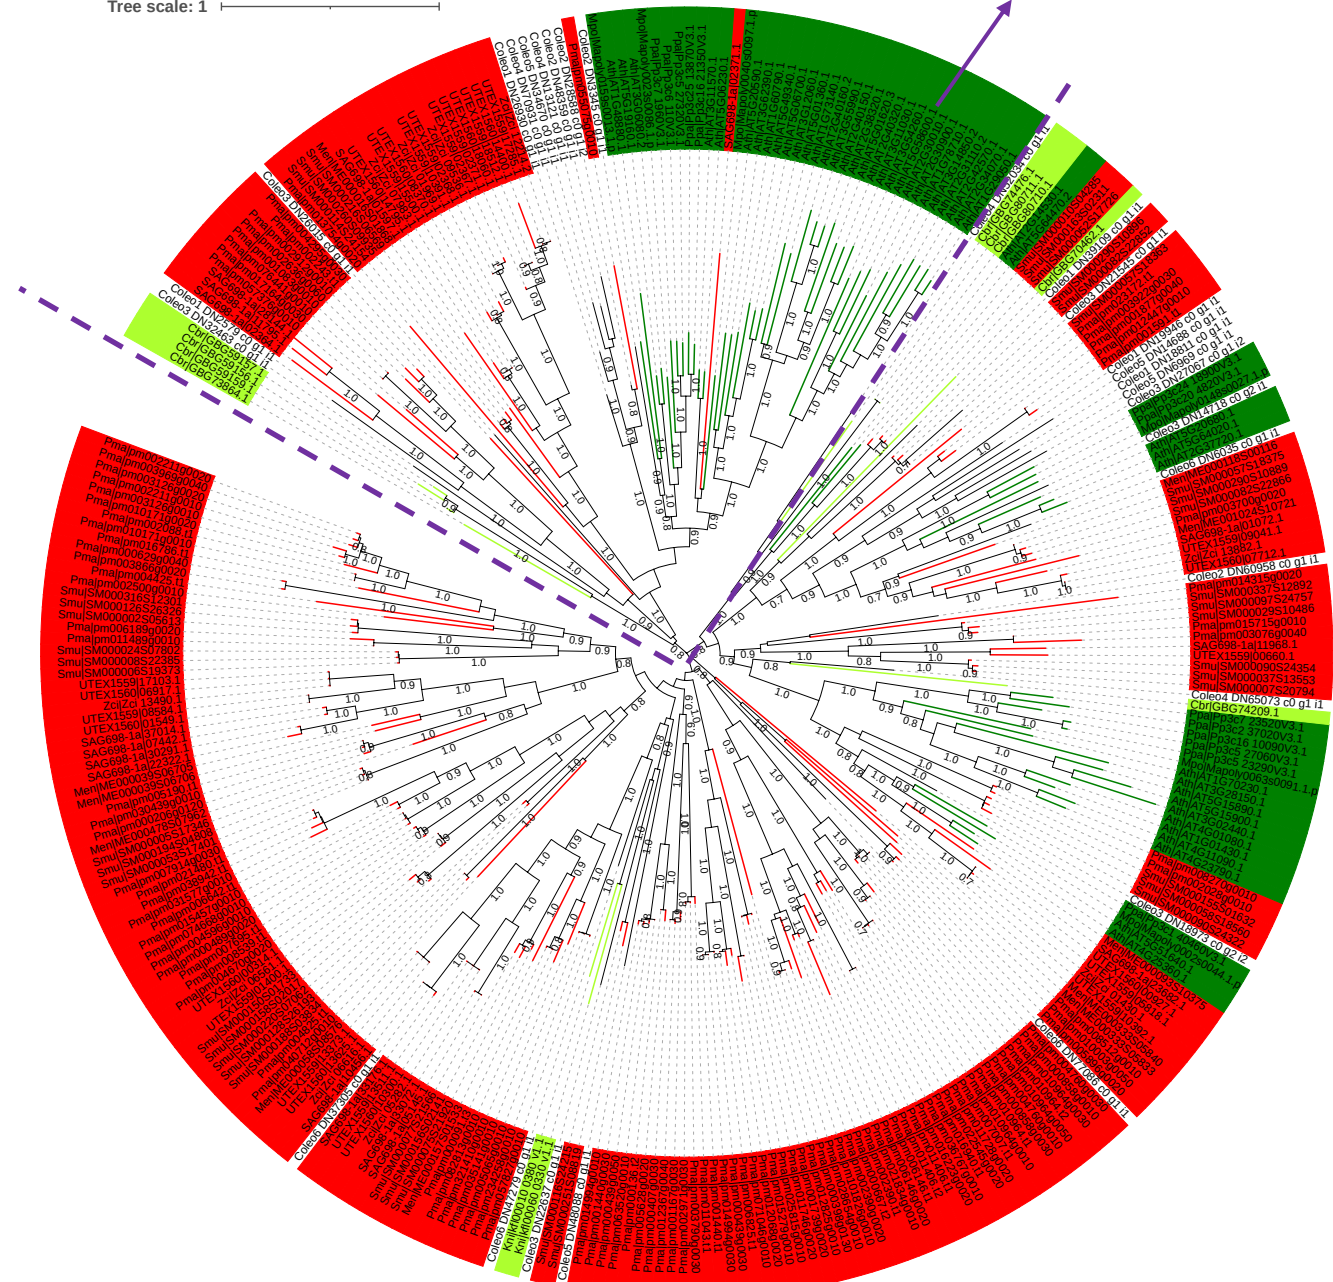

Chiniquy D, Underwood W, Corwin J, Ryan A, Szemenyei H, Lim CC, Stonebloom SH, Birdseye DS, Vogel J, Kliebenstein D, Scheller HV, Somerville S. PMR5, an acetylation protein at the intersection of pectin biosynthesis and defense against fungal pathogens. *Plant J.* 2019 Dec;100(5):1022-1035. doi: 10.1111/tjp.14497.

Data S1-66

<https://itol.embl.de/tree/13423816812456541668314644>

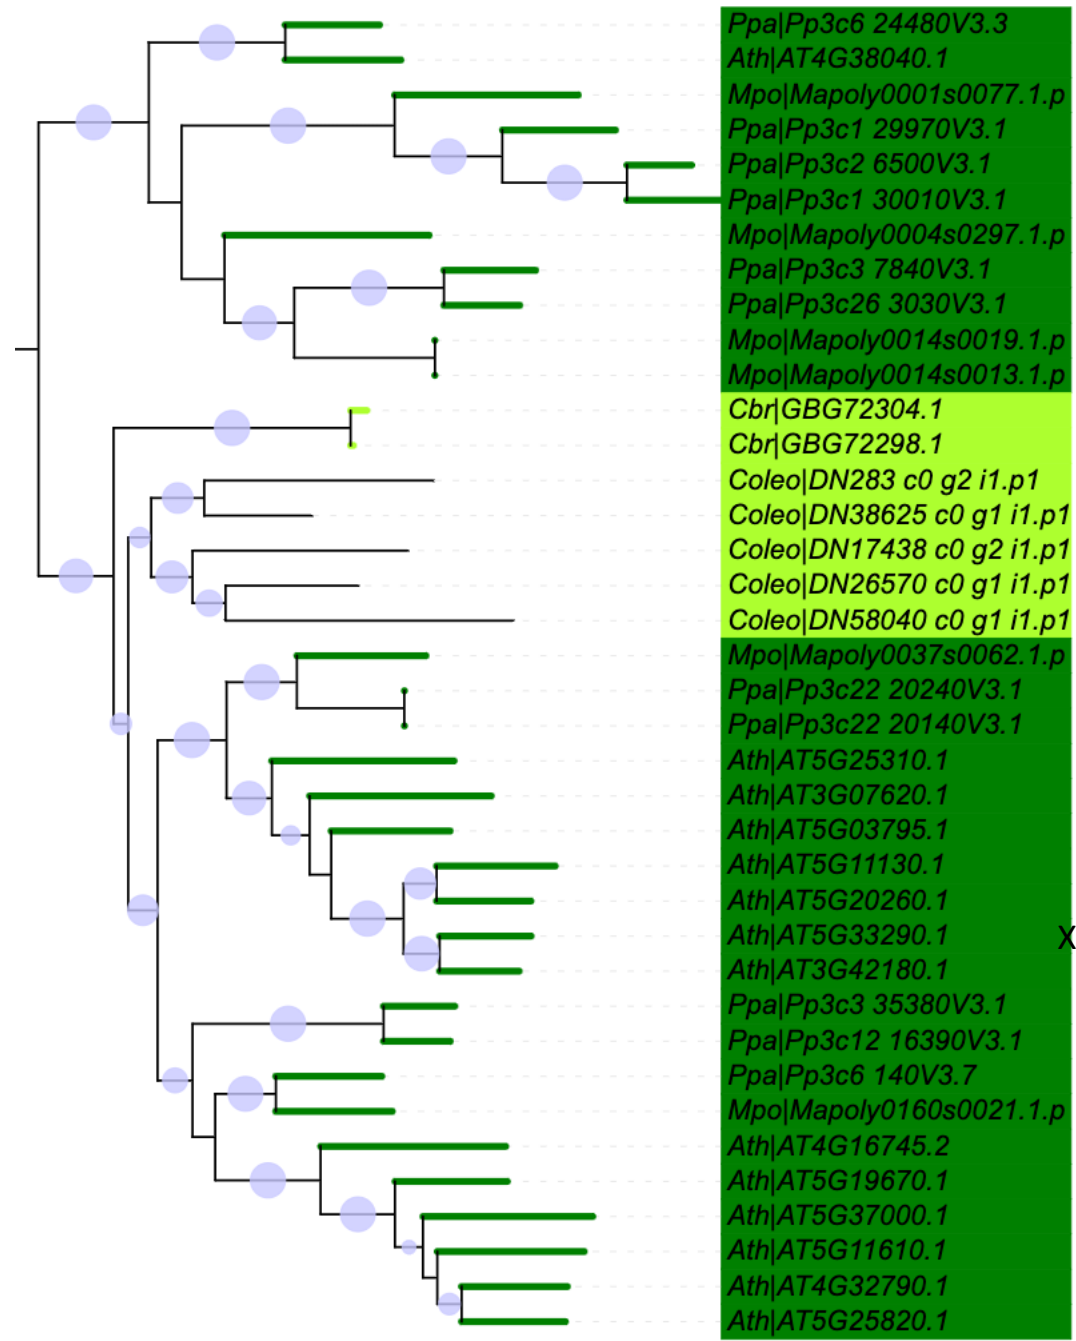

GT47 (Data S1-33)

Jensen et al. Identification of a xylogalacturonan xylosyltransferase involved in pectin biosynthesis in Arabidopsis. Plant Cell. 2008 May;20(5):1289-302. doi: 10.1105/tpc.107.050906

**XGA**

XGD1 (AT5G33290)

Tree scale: 1

# CE8: pectin methylesterase

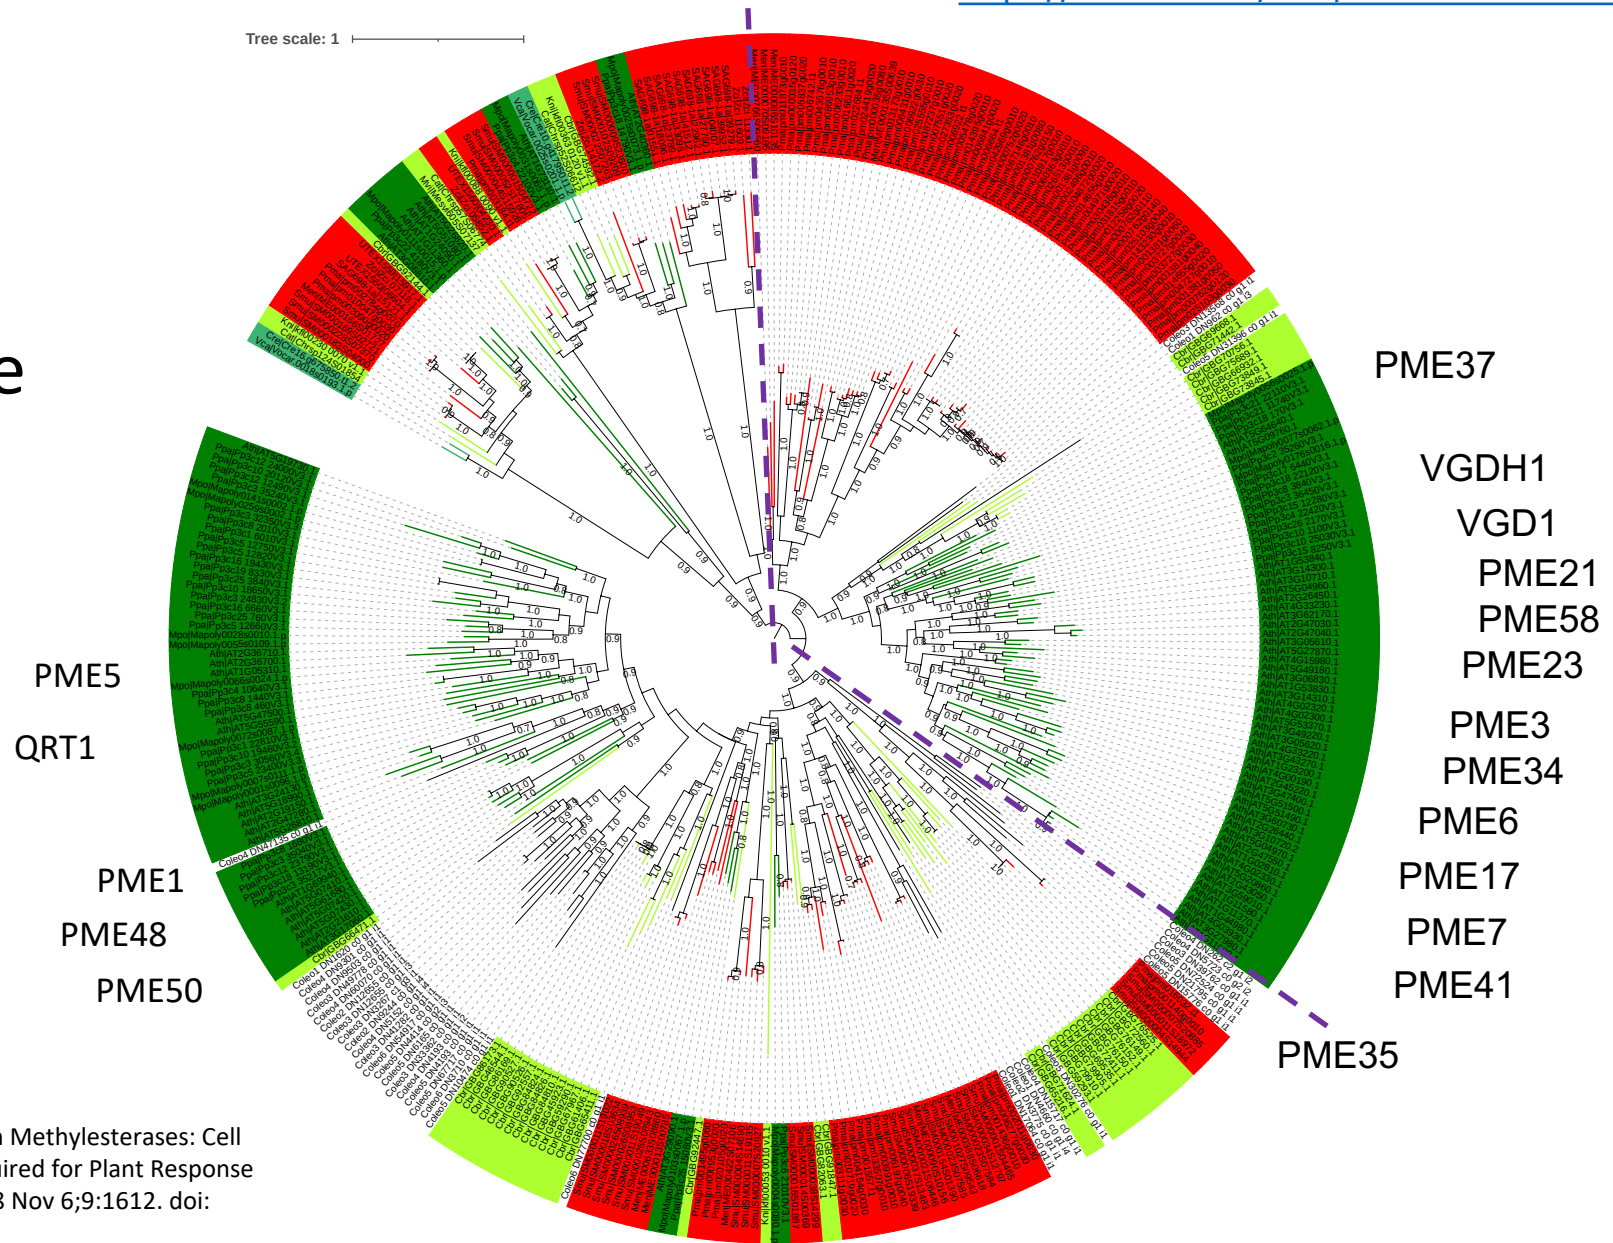

Wu HC, Bulgakov VP, Jinn TL. Pectin Methylesterases: Cell Wall Remodeling Proteins Are Required for Plant Response to Heat Stress. *Front Plant Sci.* 2018 Nov 6;9:1612. doi: 10.3389/fpls.2018.01612.

# CE13: pectin acetylerase

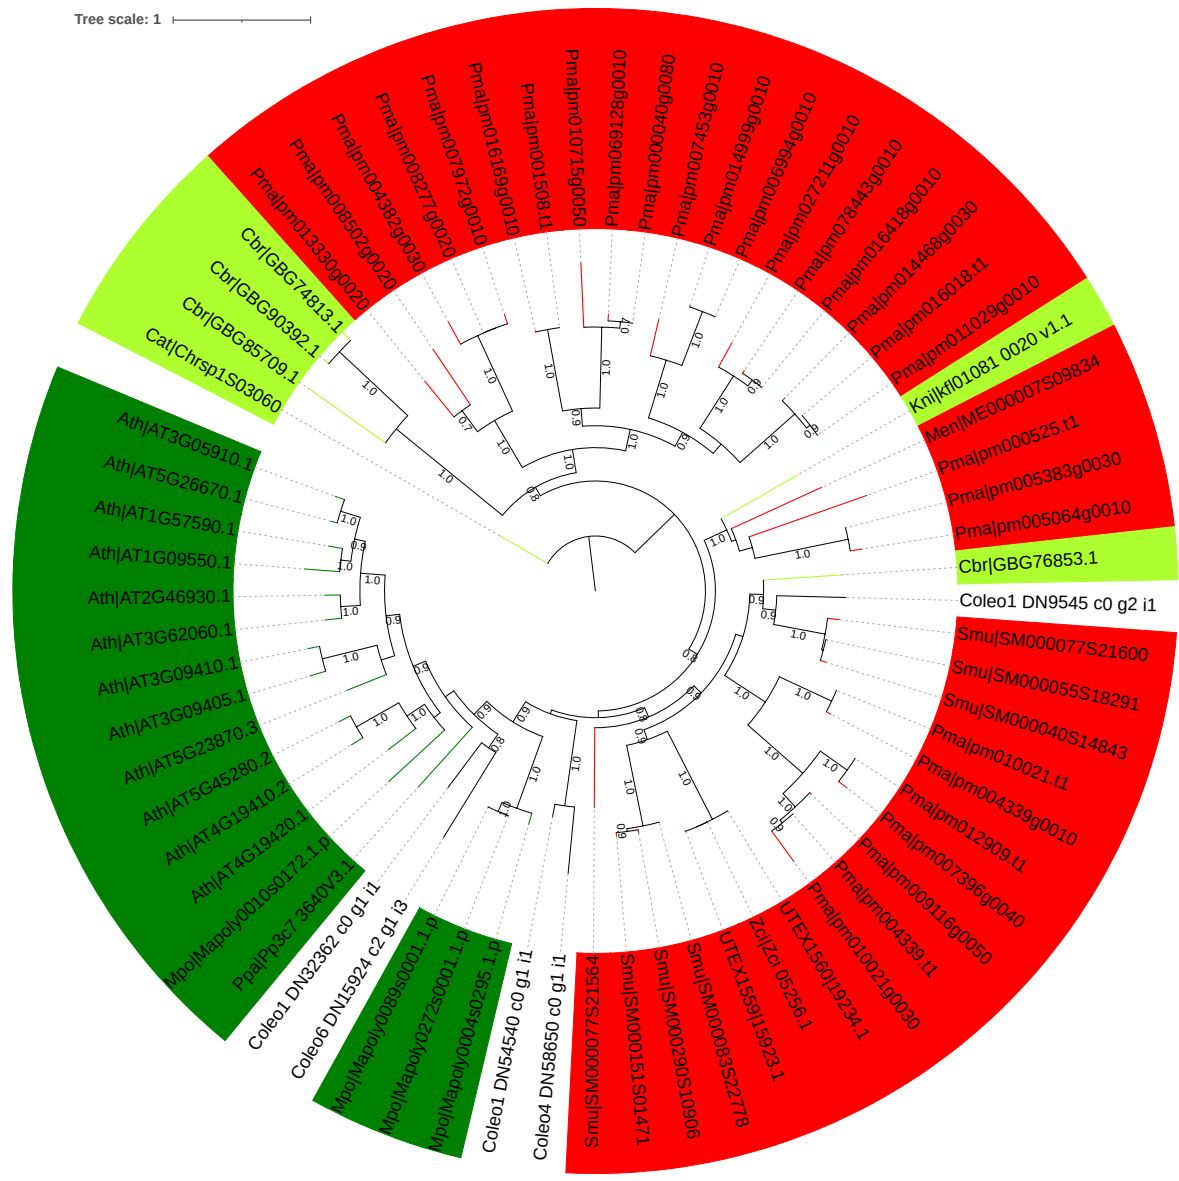

Philippe F, Pelloux J, Rayon C. Plant pectin acetylerase structure and function: new insights from bioinformatic analysis. BMC Genomics. 2017 Jun 8;18(1):456. doi: 10.1186/s12864-017-3833-0.

# Data S1-69

Tree scale: 0.5

Colored ranges

- Embryophyta
- Opisthokonta
- Bacteria
- Chlorophyta
- Charophyta
- others
- Fungi
- Archaea
- Zygnematophyceae

bootstrap

- 0.7
- 0.77
- 0.85
- 0.93
- 1

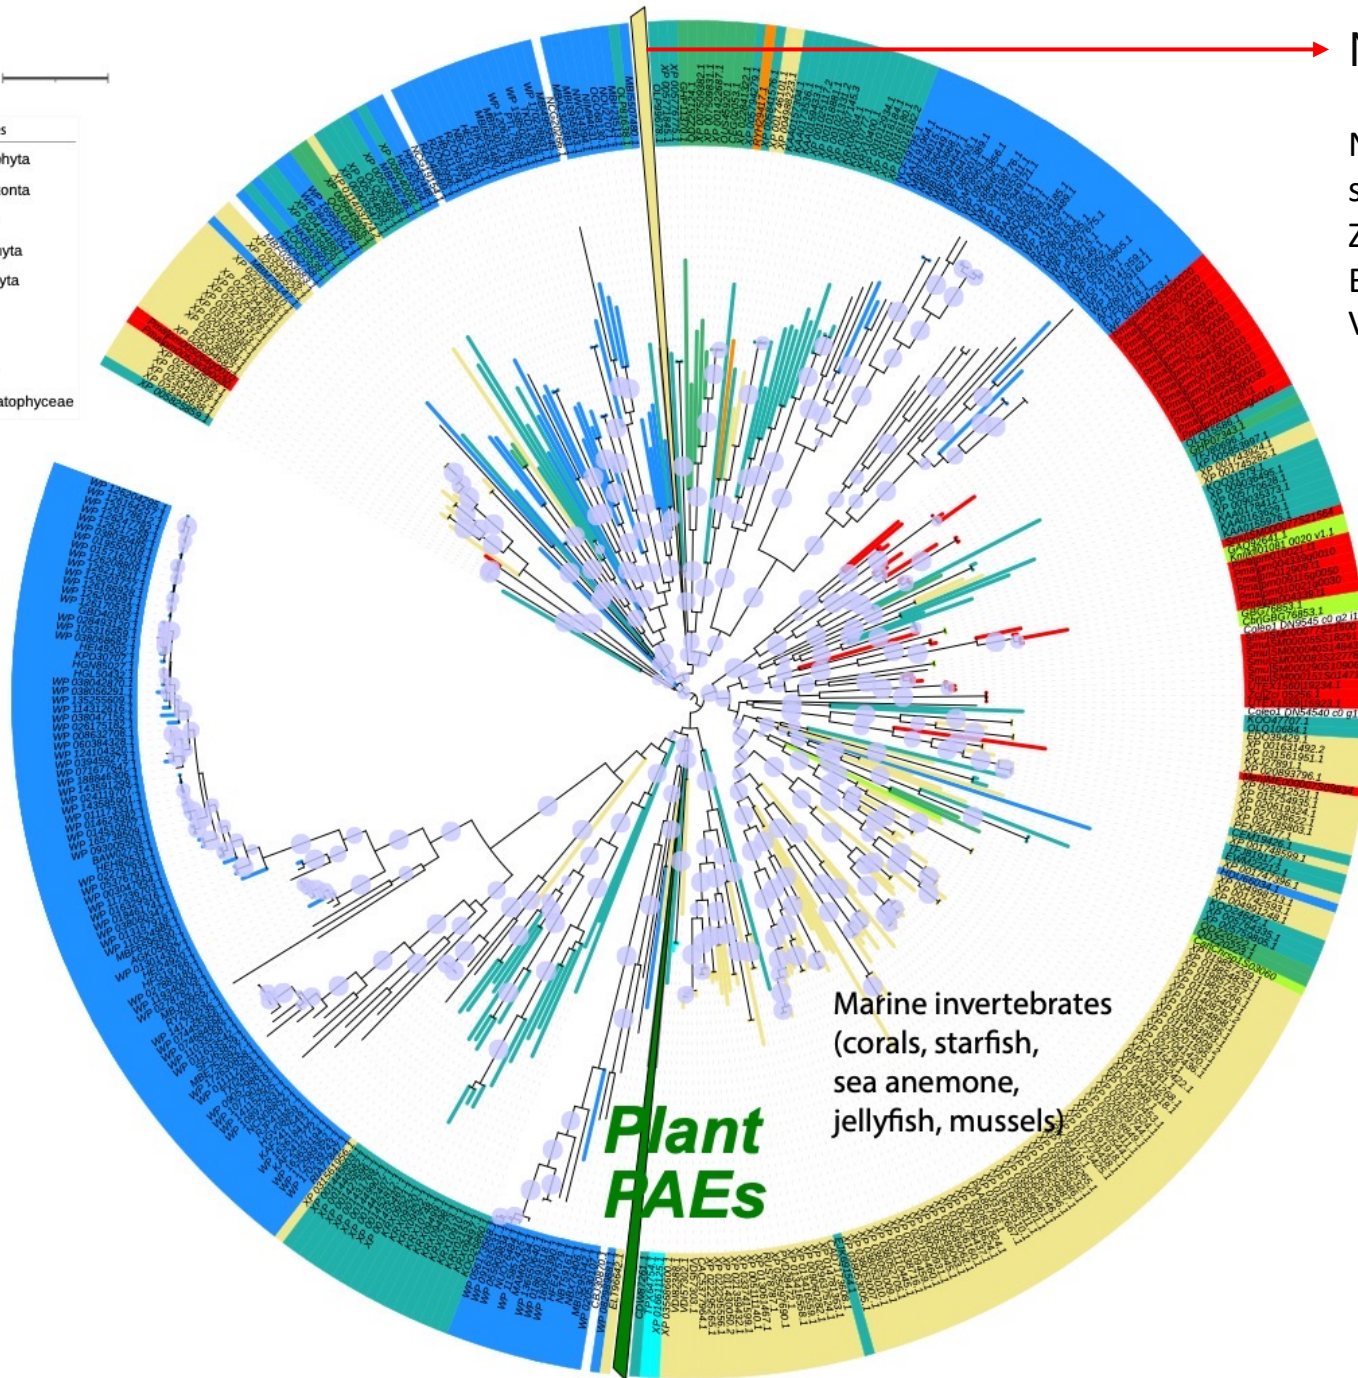

Notum from animals

Notum deacylates Wnt proteins to suppress signalling activity. Kakugawa S, Langton PF, Zebisch M, Howell SA, Chang TH, Liu Y, Feizi T, Bineva G, O'Reilly N, Snijders AP, Jones EY, Vincent JP. Nature 519, 187-92, (2015).

CE13 nr

Marine invertebrates  
(corals, starfish,  
sea anemone,  
jellyfish, mussels)

**Plant  
RAEs**



RG-I

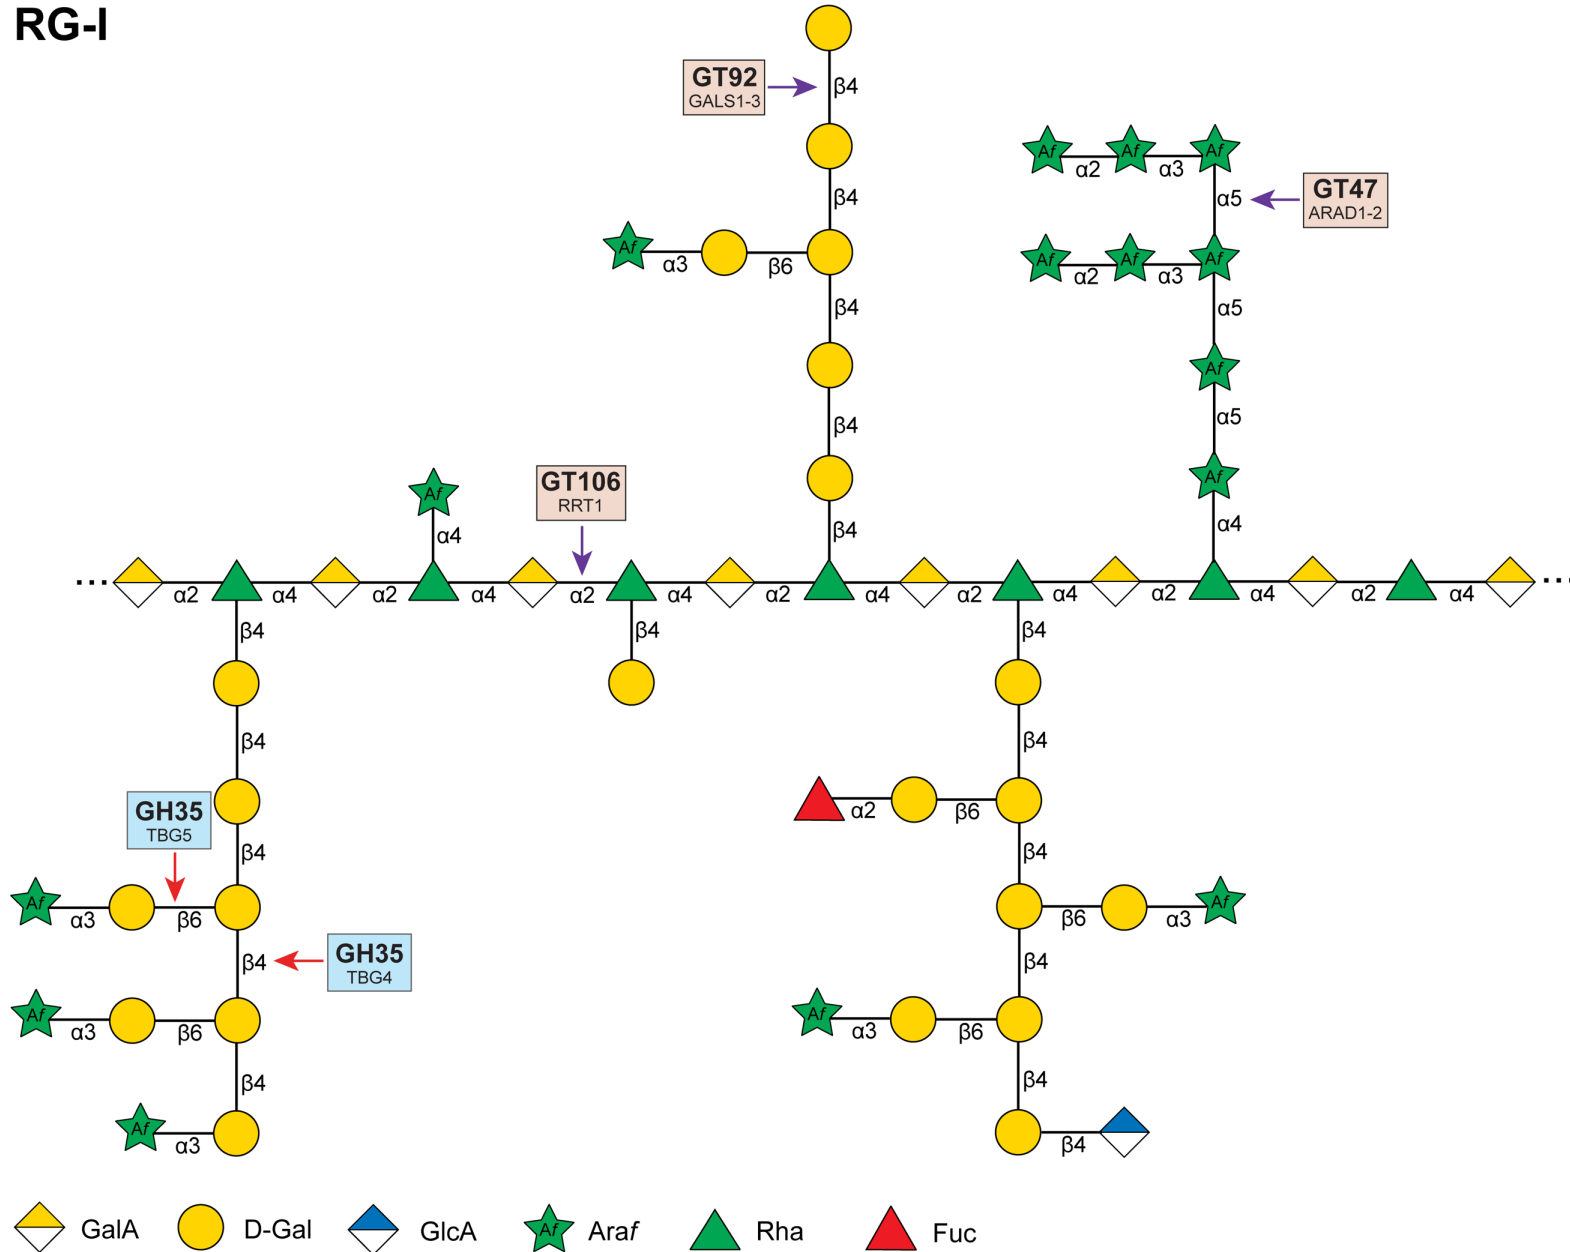

# Rhamnogalacturonan I (RG-I)

- **RG-I: 20–35% pectin**
- **GALACTAN SYNTHASE 1 (GALS1) of GT92: a  $\beta$ -1,4-galactan: $\beta$ -1,4-GalT**
- **ARABINAN DEFICIENT 1 (ARAD1) & ARAD2: pectin arabinan biosynthesis**

# GT106 + Coleochaete

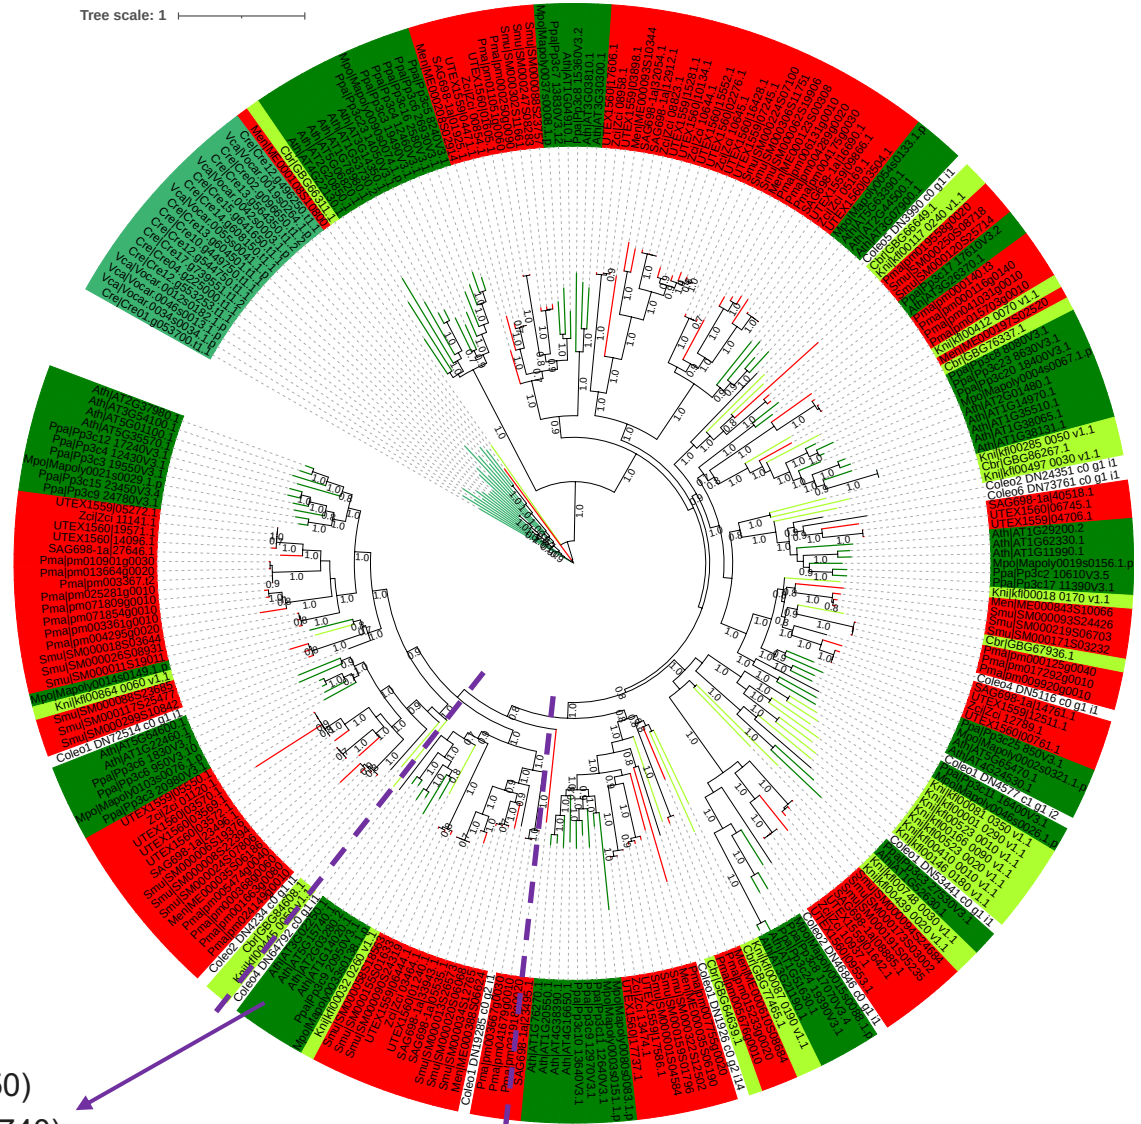

RRT2 (AT3G02250)  
 RRT1 (AT5G15740)  
 RRT3 (AT2G03280)  
 RRT4 (AT1G14020)

Takenaka Y, Kato K, Ogawa-Ohnishi M, Tsuruhama K, Kajiura H, Yagyu K, Takeda A, Takeda Y, Kunieda T, Hara-Nishimura I, Kuroha T, Nishitani K, Matsubayashi Y, Ishimizu T. Pectin **RG-I rhamnosyltransferases** represent a novel plant-specific glycosyltransferase family. Nat Plants. 2018 Sep;4(9):669-676. doi: 10.1038/s41477-018-0217-7.

# RG-I: GAT1 (GT116/DUF616) Galuronosyltransferase

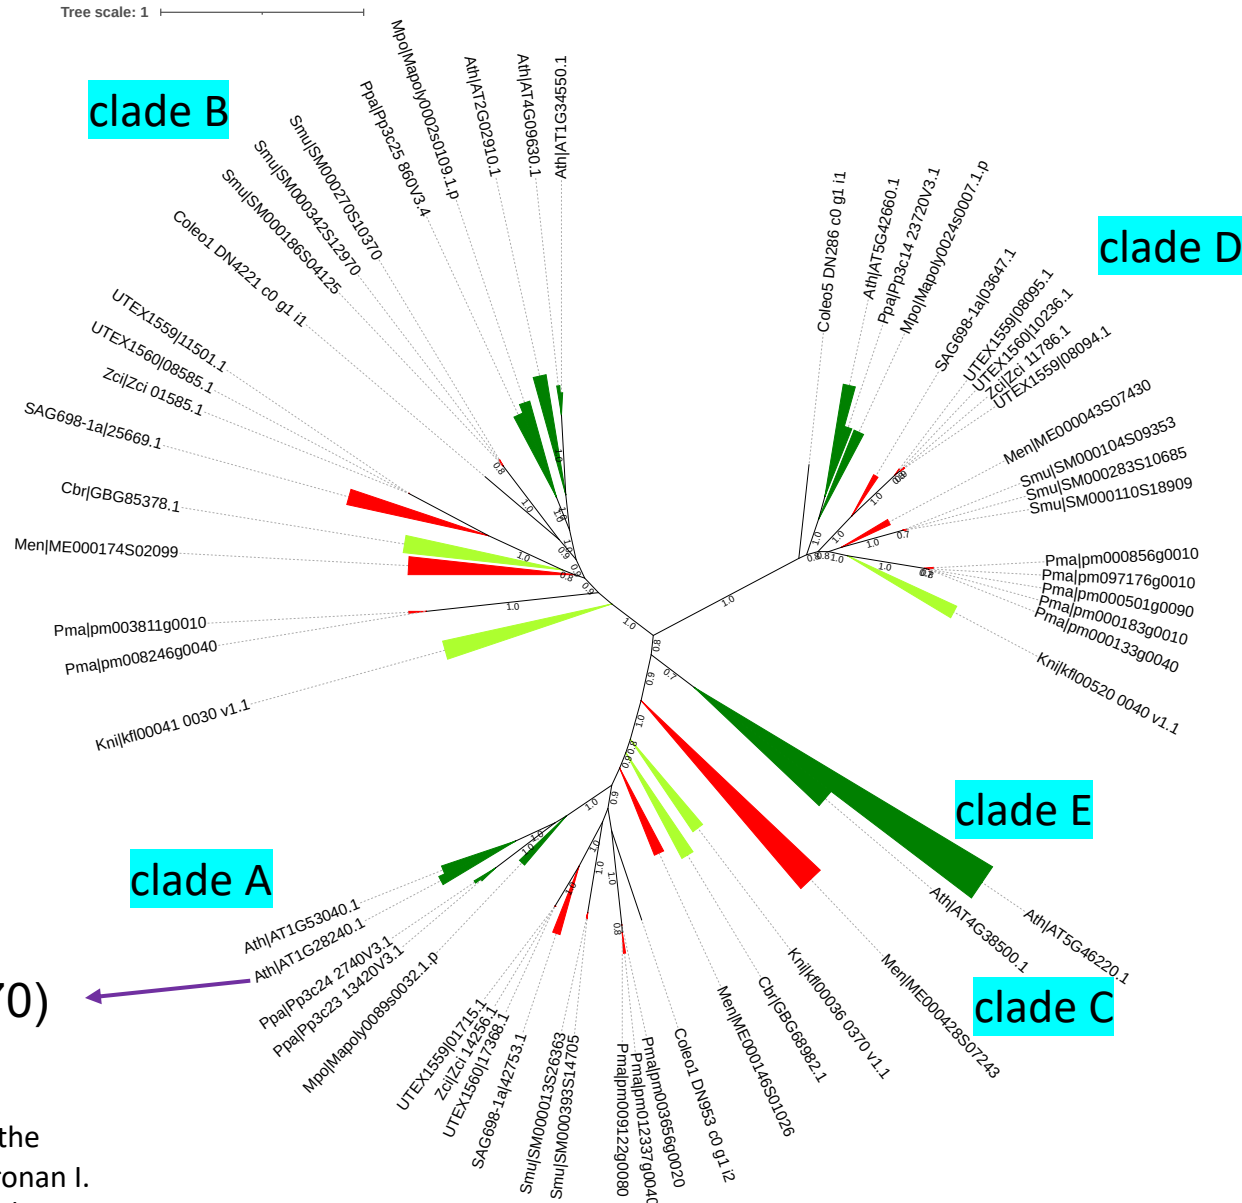

# RGGAT1(AT1G28240/MUCI70)

Amos R, Atmodjo M, Huang C, et al. Polymerization of the backbone of the pectic polysaccharide rhamnagalacturonan I. Research Square; 2022. DOI: 10.21203/rs.3.rs-1475173/v1.

**GAT1(AT1G28240/MUCI70)**

RG-I: GAT1 (DUF616)  
**Galaturonosyltransferase**

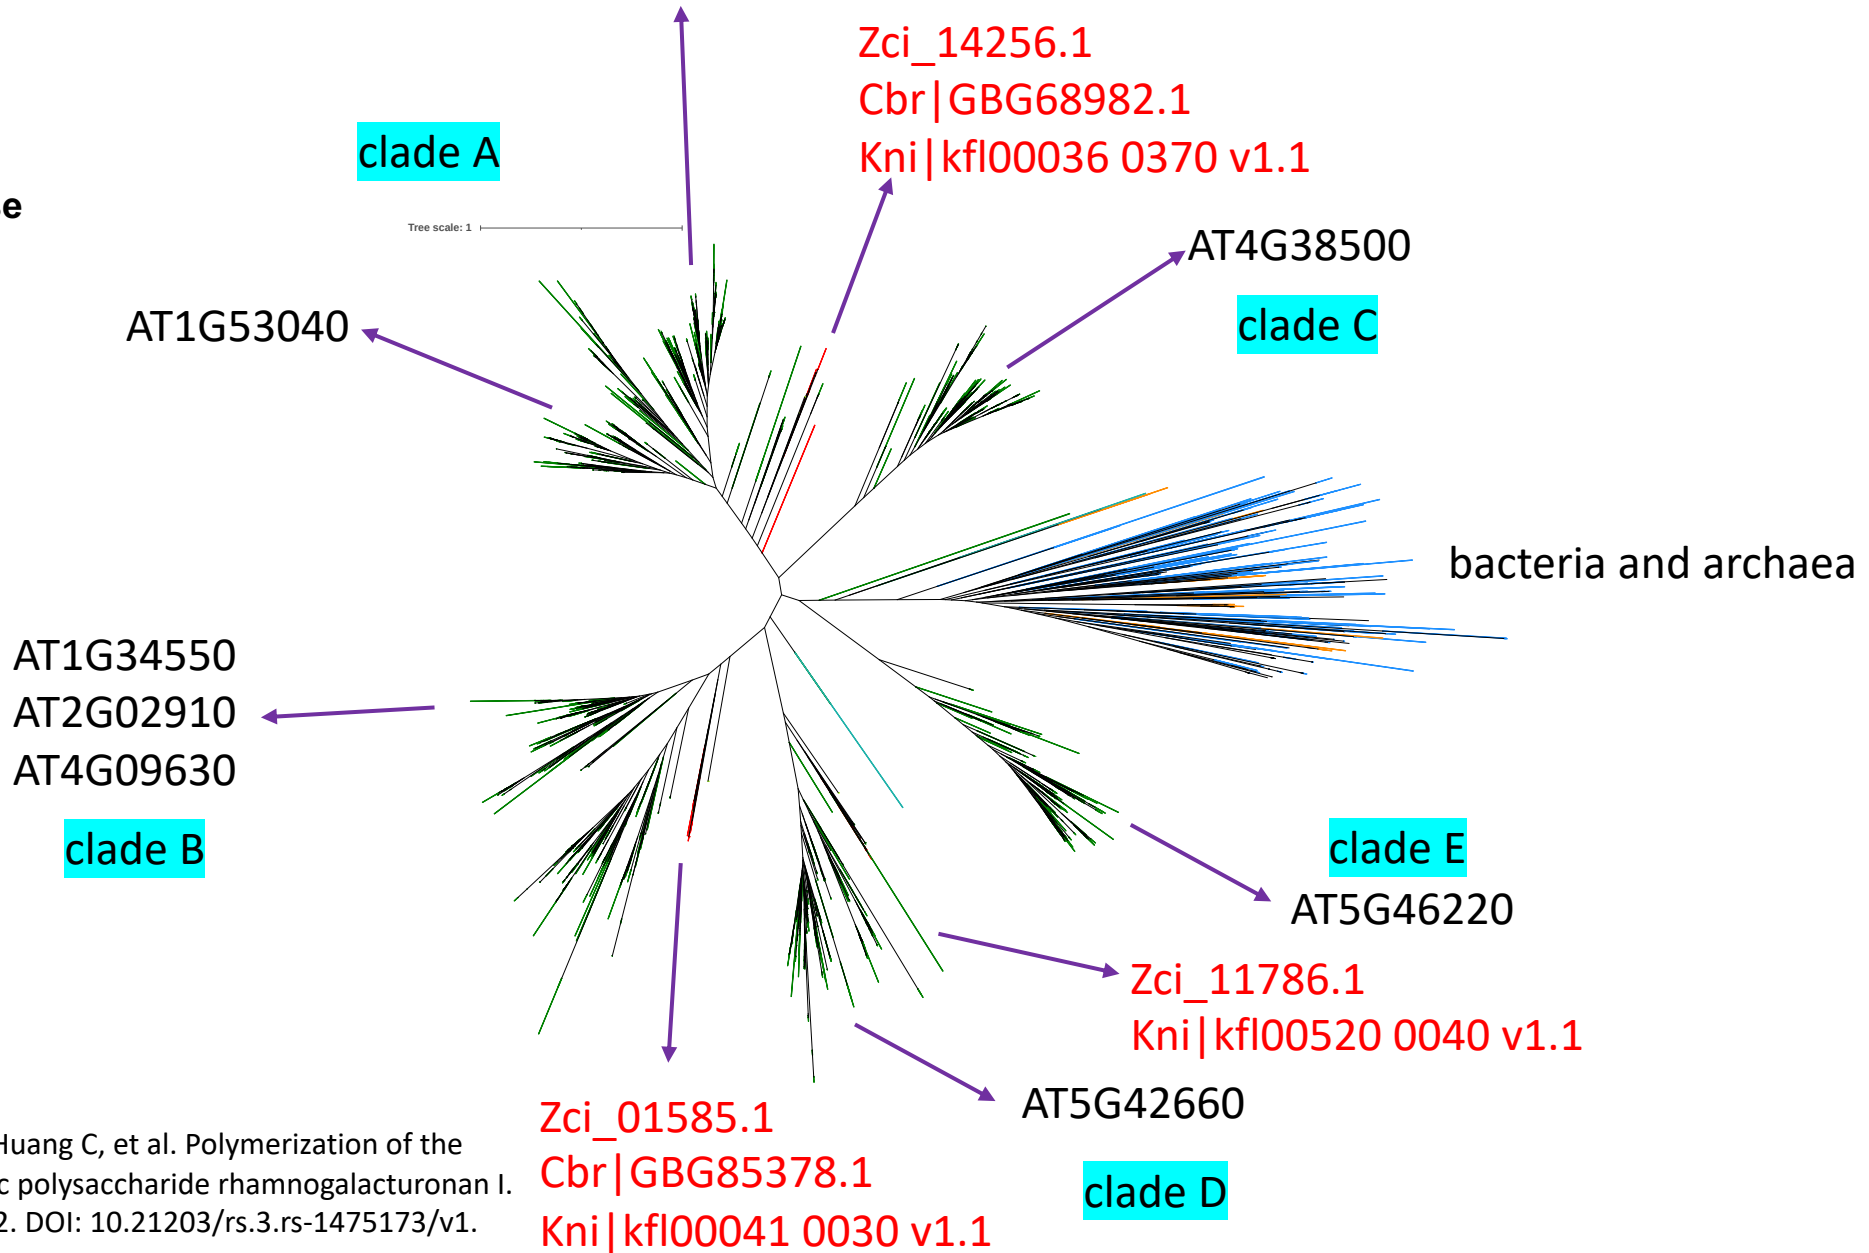

Amos R, Atmodjo M, Huang C, et al. Polymerization of the backbone of the pectic polysaccharide rhamnogalacturonan I. Research Square; 2022. DOI: 10.21203/rs.3.rs-1475173/v1.

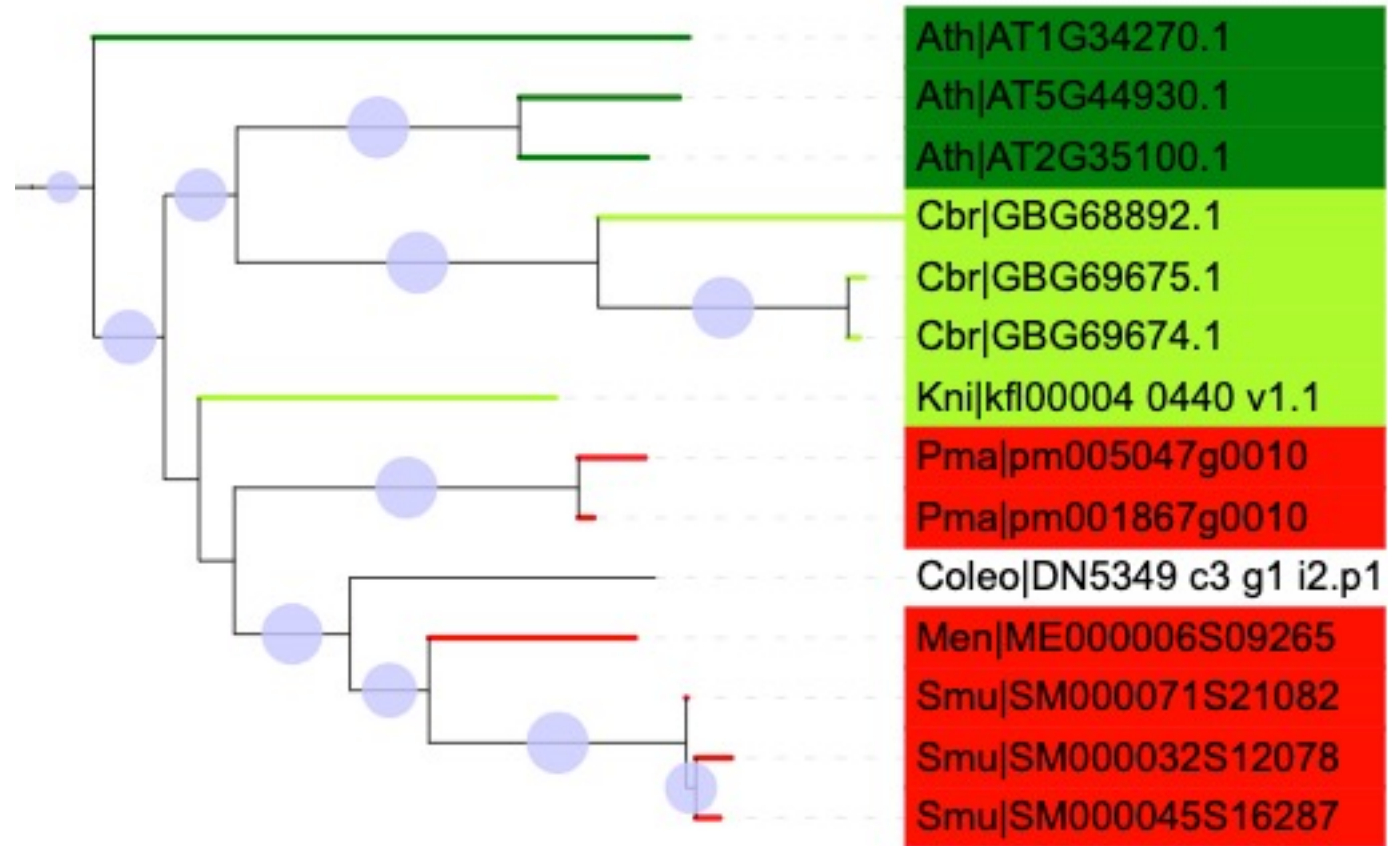

ARAD2 (AT5G44930)  
ARAD1 (AT2G35100)

**RG-I**

Harholt et al. ARABINAN DEFICIENT 1 is a putative arabinosyltransferase involved in biosynthesis of pectic arabinan in Arabidopsis. Plant Physiol. 2006 Jan;140(1):49-58. doi: 10.1104/pp.105.072744.

GT47

Tree scale: 1

# GT92 (PF01697)

e-value: e-10

GALS3 (AT4G20170) ←  
 GALS2 (AT5G44670) ←  
 GALS1 (AT2G33570) ←

Gene number:  
 SAG 698-1b: 9  
 SAG 698-1a: 9  
 UTEX1559: 9  
 UTEX1560: 9

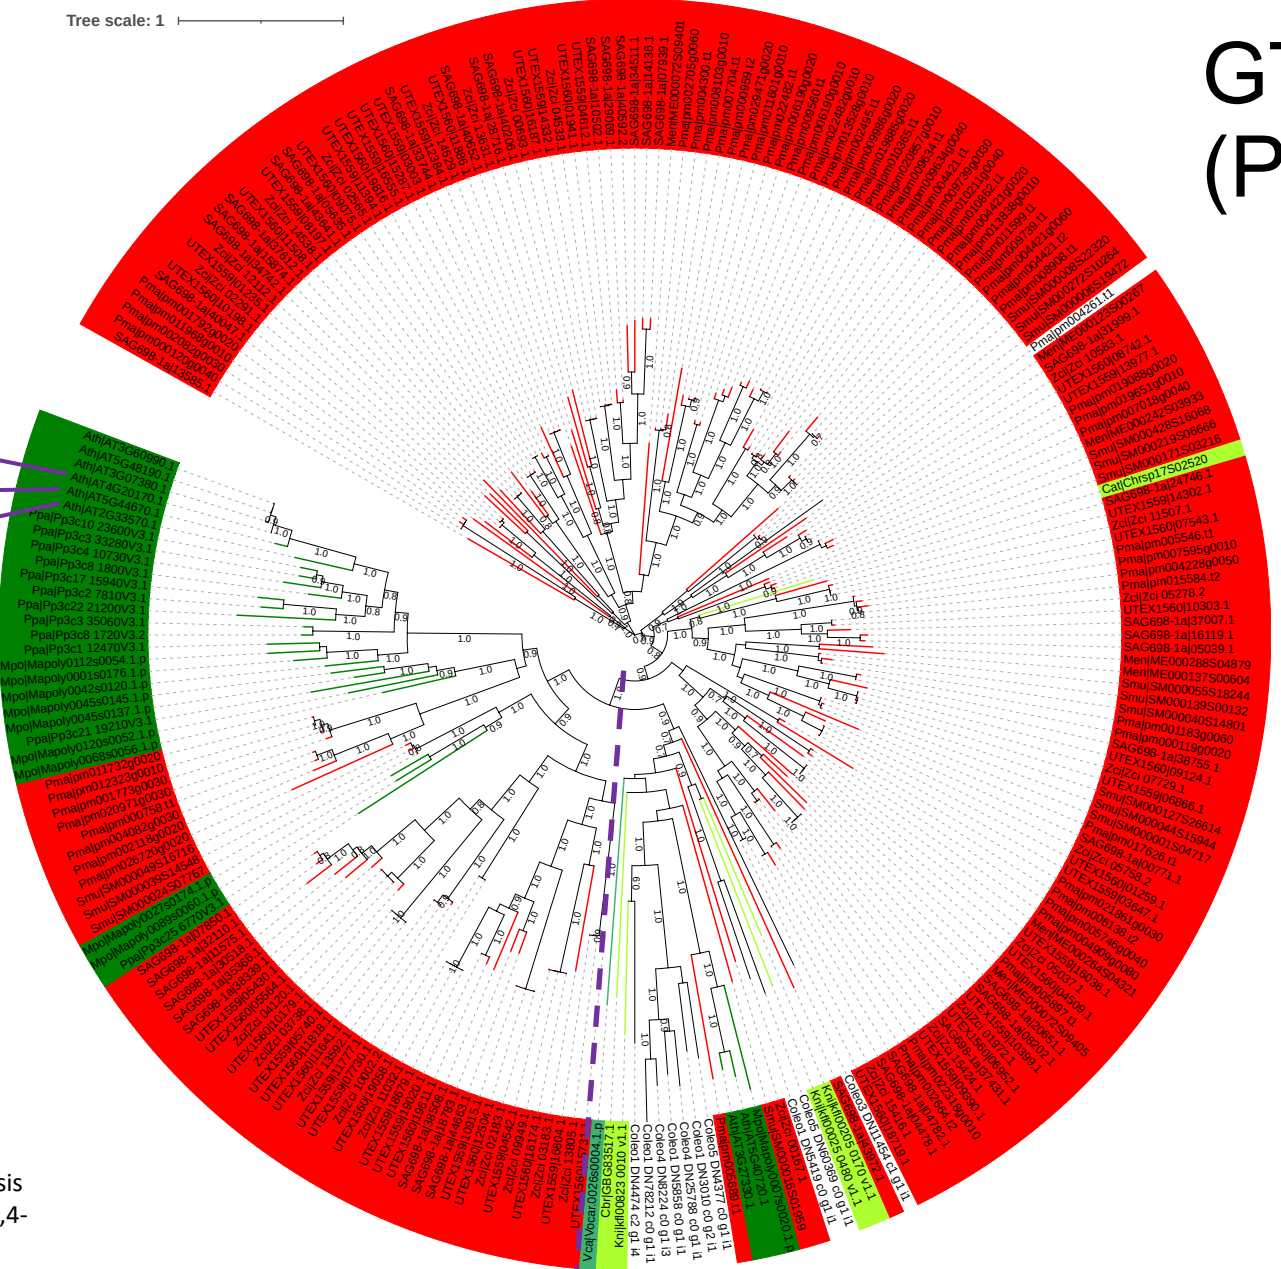

Liwanag et al. Pectin biosynthesis: GALS1 in Arabidopsis thaliana is a β-1,4-galactan β-1,4-galactosyltransferase. Plant Cell. 2012 Dec;24(12):5024-36. doi: 10.1105/tpc.112.106625.

Ebert et al. The Three Members of the Arabidopsis Glycosyltransferase Family 92 are Functional β-1,4-Galactan Synthases. Plant Cell Physiol. 2018 Dec 1;59(12):2624-2636. doi: 10.1093/pcp/pcy180.

**Polysaccharide Lyase Family 4 / Subf 2  
rhamnogalacturonan endolyase (EC 4.2.2.23)**

Mokshina N, Makshakova O, Nazipova A, Gorshkov O, Gorshkova T. Flax rhamnogalacturonan lyases: phylogeny, differential expression and modeling of protein structure. *Physiol Plant*. 2019 Oct;167(2):173-187. doi: 10.1111/ppl.12880.

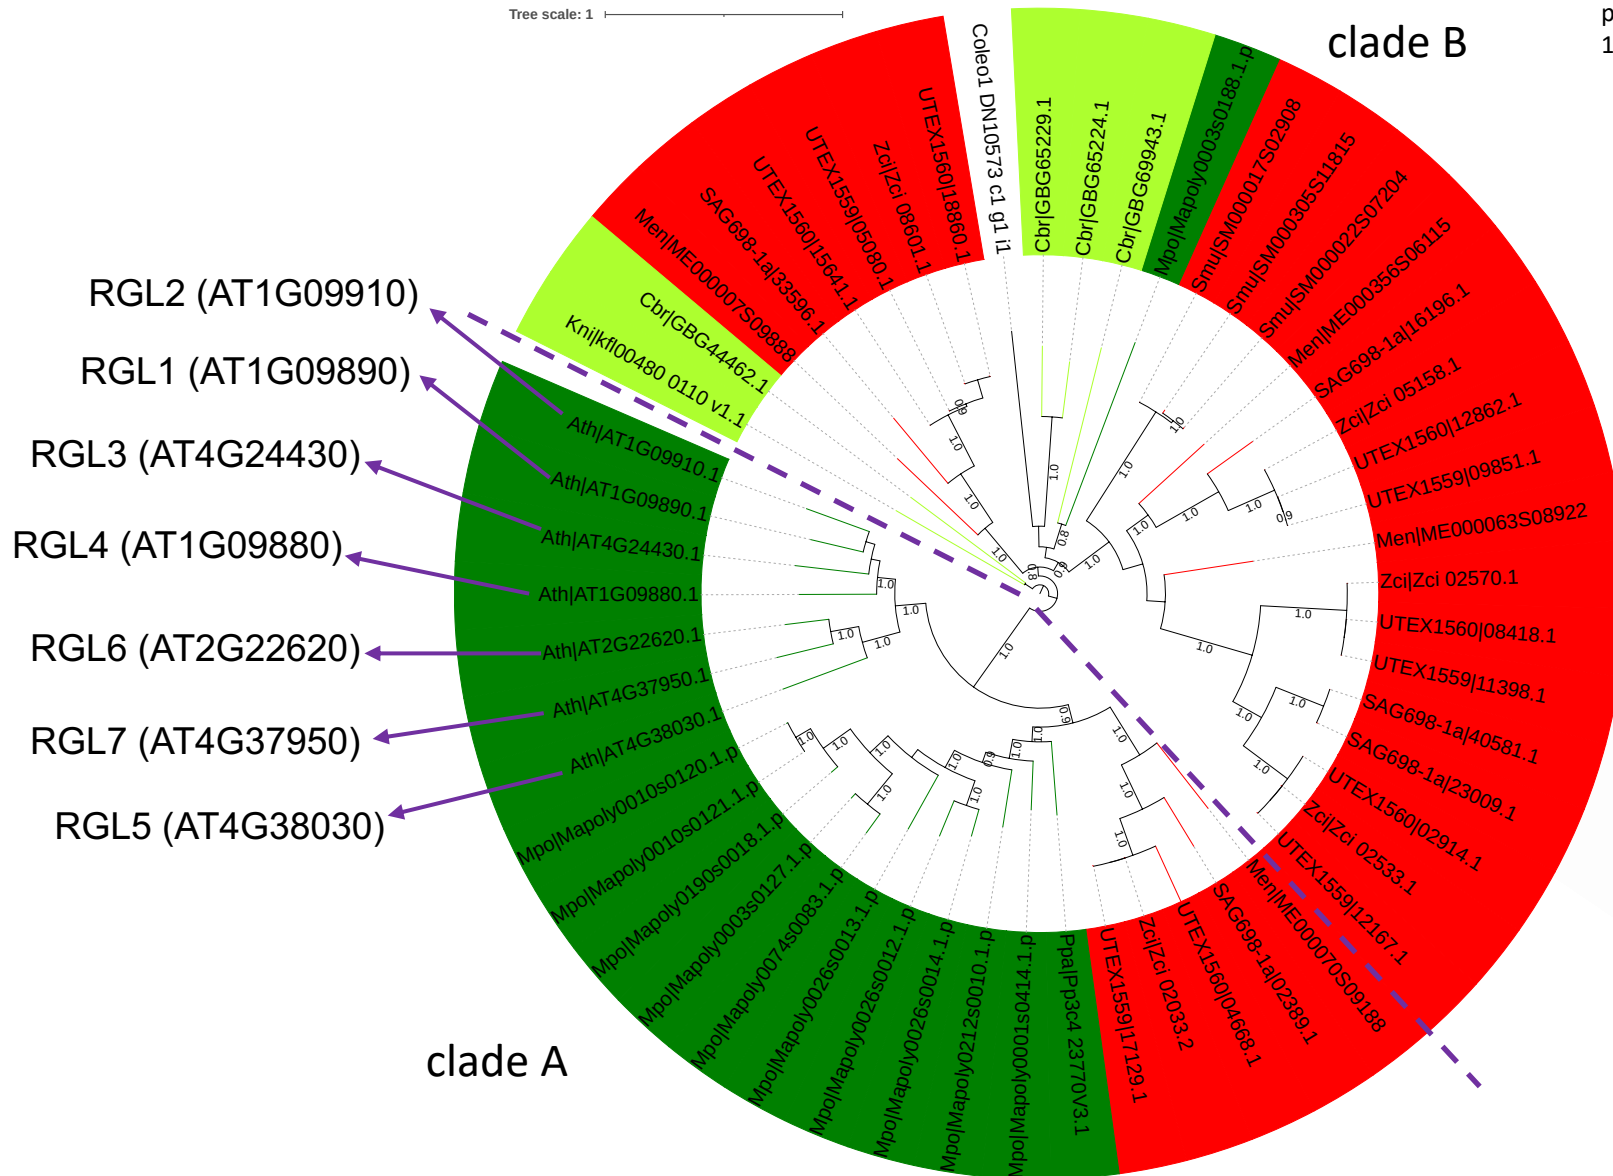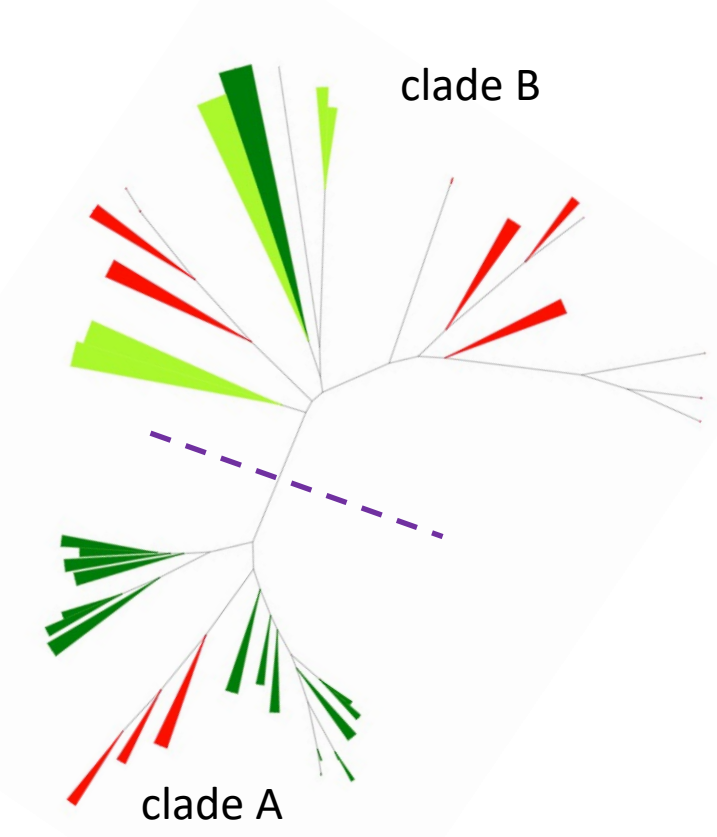

# Data S1-77

<https://itol.embl.de/tree/208127240222360251667019913>

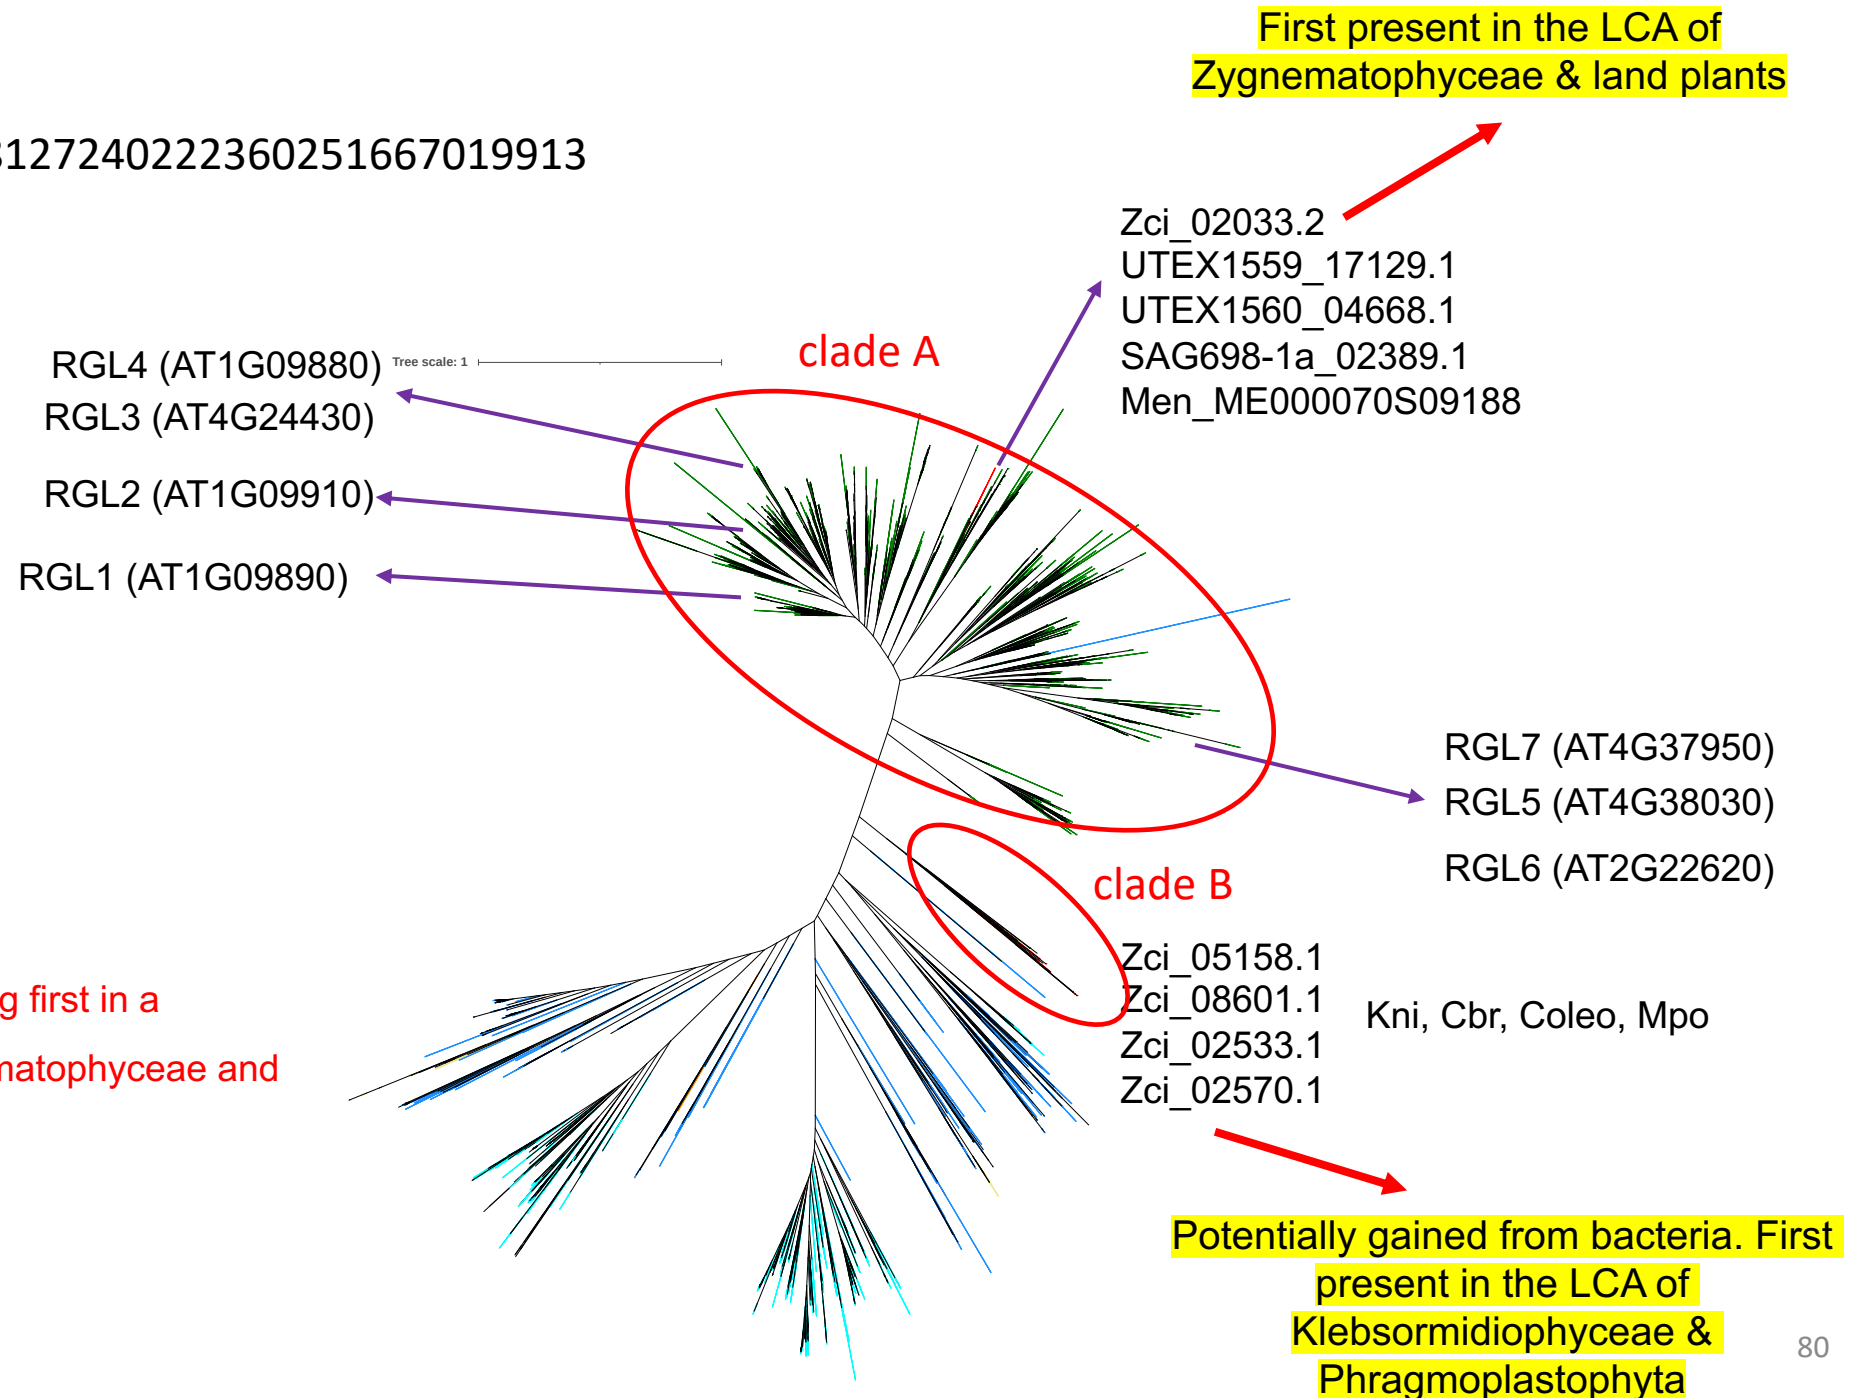

## RGLs:

- clade B is the older clade
- clade A is younger, appearing first in a common ancestor of Zygnematophyceae and land plants



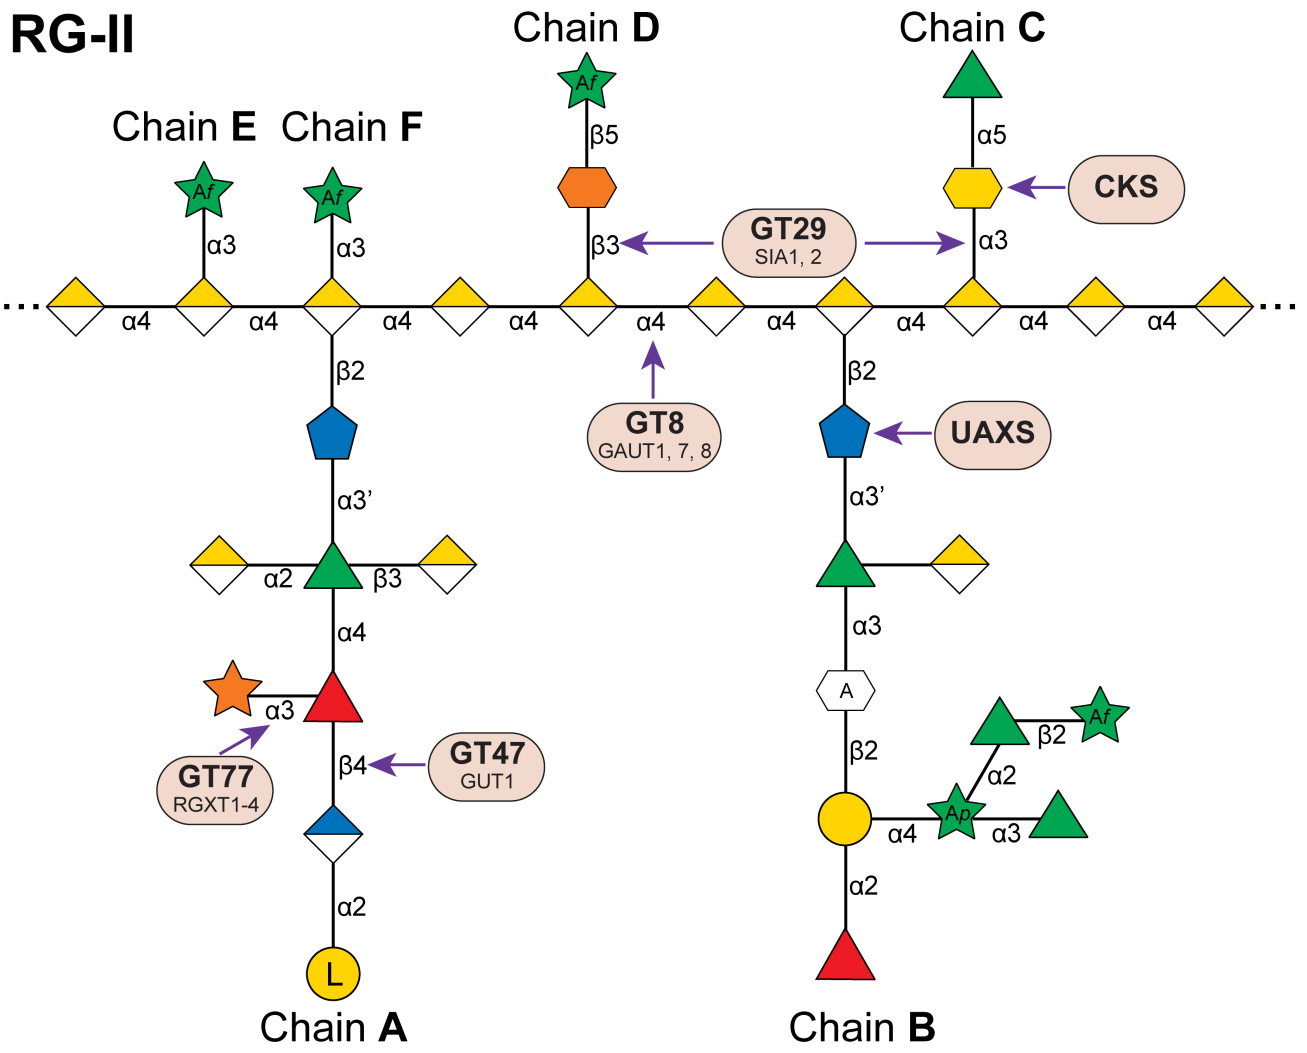

# Rhamnogalacturonan II (RG-II)

- **R**HAMNO**G**ALACTURONAN **X**YLOSYL-**T**RANSFERASES (RGXTs): RG- II: $\alpha$ -1,3-xylosyltransferase activity

|  |        |  |       |  |             |  |     |  |      |  |     |  |      |
|--|--------|--|-------|--|-------------|--|-----|--|------|--|-----|--|------|
|  | GalA   |  | D-Gal |  | Kdo         |  | Xyl |  | Araf |  | Rha |  | GlcA |
|  | Apiose |  | GalA  |  | Aceric acid |  | Dha |  | Arap |  | Fuc |  |      |

Tree scale: 1

# GT77 + Coleochaete

## $\alpha$ -1,3-xylosyltransferases pectic rhamnogalacturonan-II

Egelund et al. Arabidopsis thaliana RGXT1 and RGXT2 encode Golgi-localized (1,3)- $\alpha$ -D-xylosyltransferases involved in the synthesis of pectic rhamnogalacturonan-II. Plant Cell. 2006 Oct;18(10):2593-607. doi: 10.1105/tpc.105.036566.

- RGXT3 (At1g56550)
- RGXT4/MGP4 (At4g01220)
- RGXT2 (At4g01750)
- RGXT1 (At4g01770)

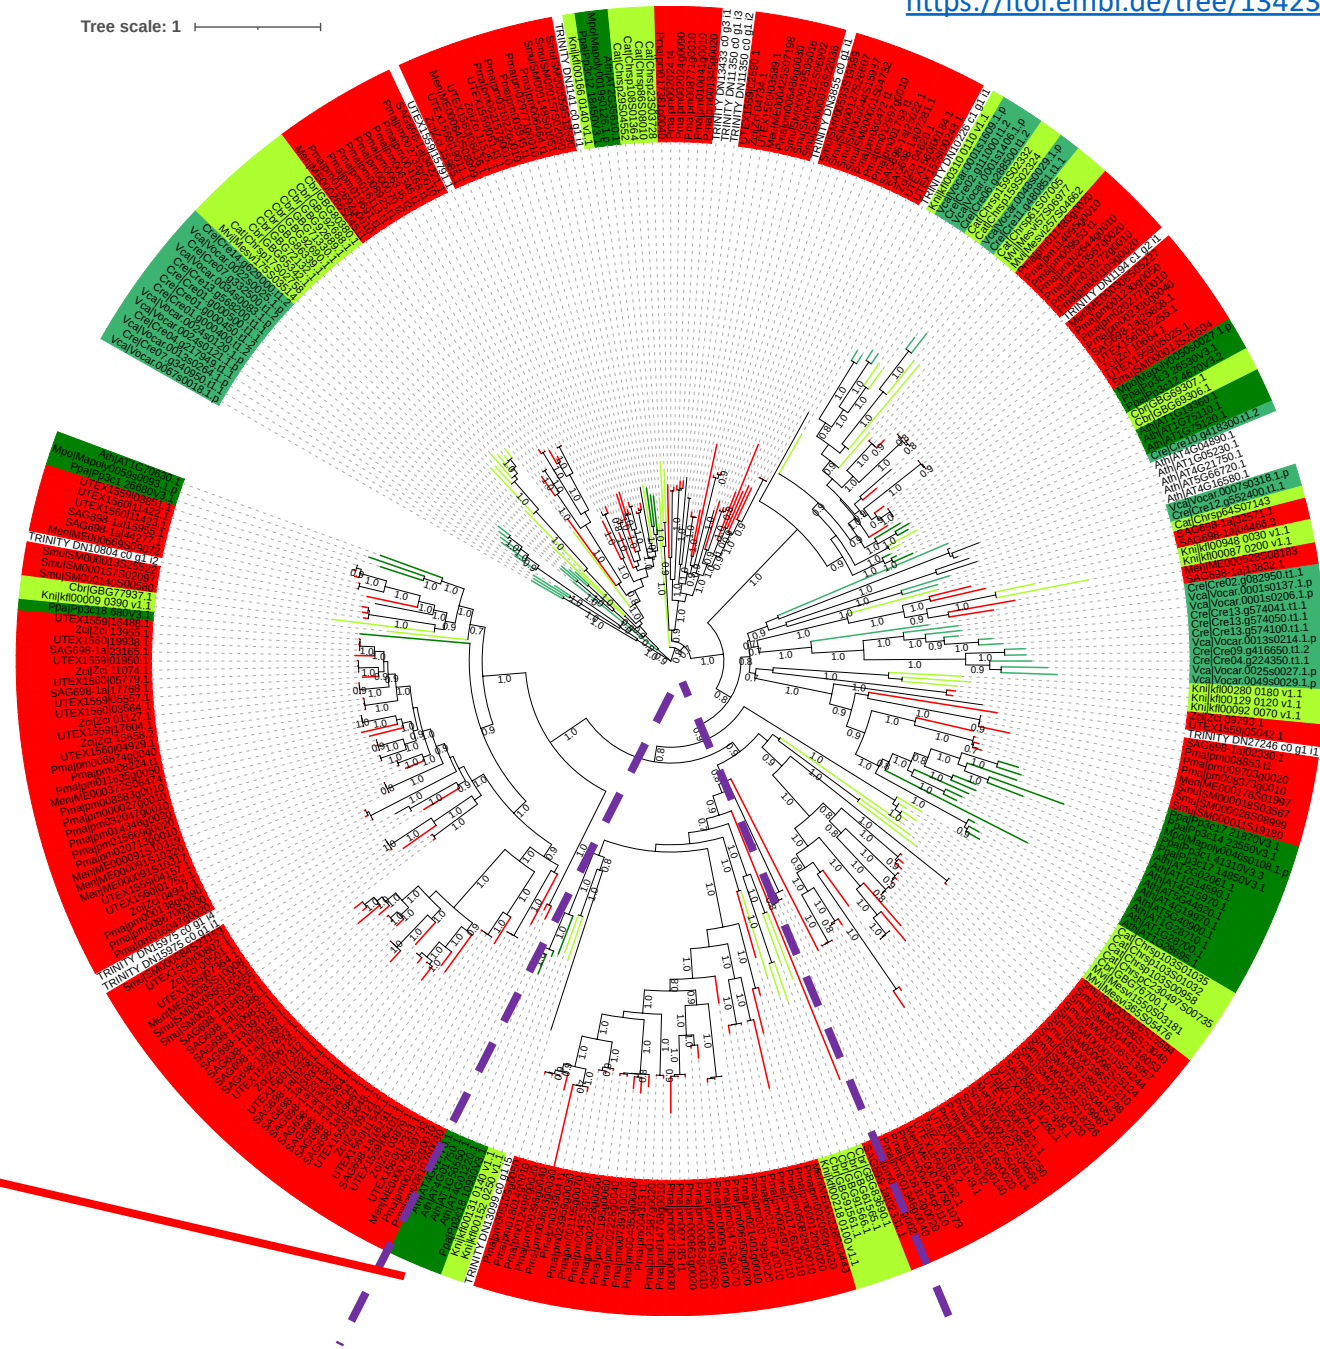

Data S1-80

SIA2 (At3g48820)  
SIA1 (At1g08660)

Dumont M, Lehner A, Bouton S, Kiefer-Meyer MC, Voxeur A, Pelloux J, Lerouge P, Mollet JC. The cell wall pectic polymer **ramnogalacturonan-II** is required for proper pollen tube elongation: implications of a **putative sialyltransferase-like protein**. Ann Bot. 2014 Oct;114(6):1177-88. doi: 10.1093/aob/mcu093.

GT29 +  
Coleochaete

<https://itol.embl.de/tree/20812783235334831665116092>

Tree scale: 1

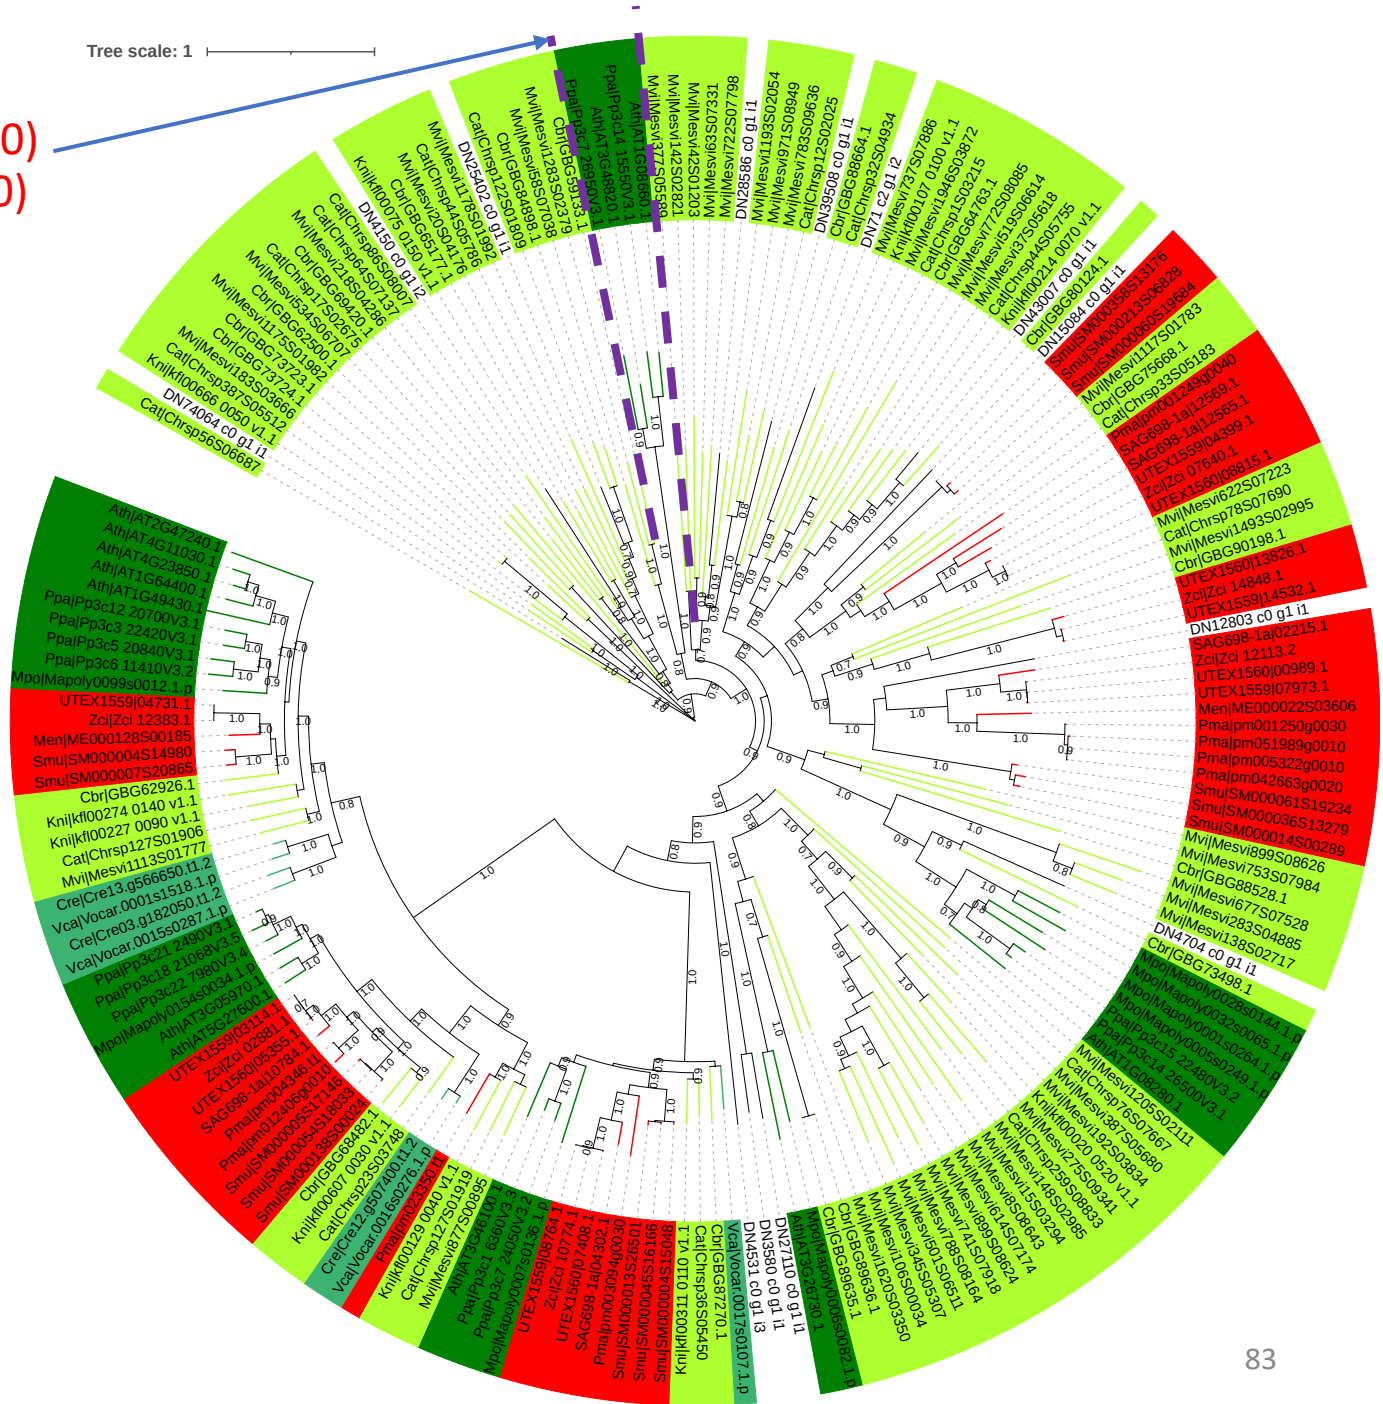

# Data S1-81

# GH28

GH28.hmm (dbcan) from 16 genomes and Coleochaete with e-value < 1e-10

Rodríguez-Gacio Mdel C, Nicolás C, Matilla AJ. Cloning and analysis of a cDNA encoding an endo-polygalacturonase expressed during the desiccation period of the silique-valves of turnip-tops (*Brassica rapa* L. cv. Rapa). *J Plant Physiol.* 2004 Feb;161(2):219-27. doi: 10.1078/0176-1617-01153.

Gallego-Giraldo, L., Liu, C., Pose-Albacete, S., Pattathil, S., Peralta, A.G., Young, J. et al. (2020) ARABIDOPSIS DEHISCENCE ZONE POLYGALACTURONASE1 (ADPG1) releases latent defense signals in stems with reduced lignin content. *Proceedings of the National Academy of Sciences of the United States of America*, 117, 3281–3290

**ADPG1 (At3g57510)**

Torki, M., Mandaron, P., Mache, R., and Falconet, D. (2000). Characterization of a ubiquitous expressed gene family encoding polygalacturonase in *Arabidopsis thaliana*. *Gene* 242, 427–436. doi: 10.1016/S0378-1119(99)00497-7

**PGF8** (Pectin lyase-like superfamily protein, AT3G57790)

[AT19170\(PGF1\)](#)  
[AT3G42950\(PGF6\)](#)

E-V

clade E Zci\_09024

[AT4G33440\(PGF14\)](#) [AT5G41870\(PGF15\)](#)  
[AT4G23820\(PGF13\)](#)  
[AT3G16850\(PGF5\)](#)  
[AT3G06770\(PGF4\)](#)  
[AT5G49215\(PGF16\)](#)  
[AT4G23500\(PGF12\)](#)  
[AT3G61490\(PGF9\)](#)  
[AT2G23900\(PGF3\)](#)  
[AT3G48950\(PGF7\)](#)  
[AT3G62110\(PGF10\)](#)

PMID: [30154820](#)

Park, KC., Kwon, SJ. & Kim, NS. Intron loss mediated structural dynamics and functional differentiation of the polygalacturonase gene family in land plants. *Genes Genom* 32, 570–577 (2010).

**67 Ath IDs**

AT4G01890  
AT1G02460  
[AT1G56710\(PGL1\)](#)  
[AT1G48100\(PGX3\)](#)  
AT1G10640  
AT1G60590  
[AT5G14650\(PGLR\)](#)  
[AT3G26610\(PGX1\)](#)  
AT1G23460  
AT1G70500  
AT1G80170  
AT1G80140  
AT5G39910  
AT5G17200  
AT3G15720  
AT4G32370

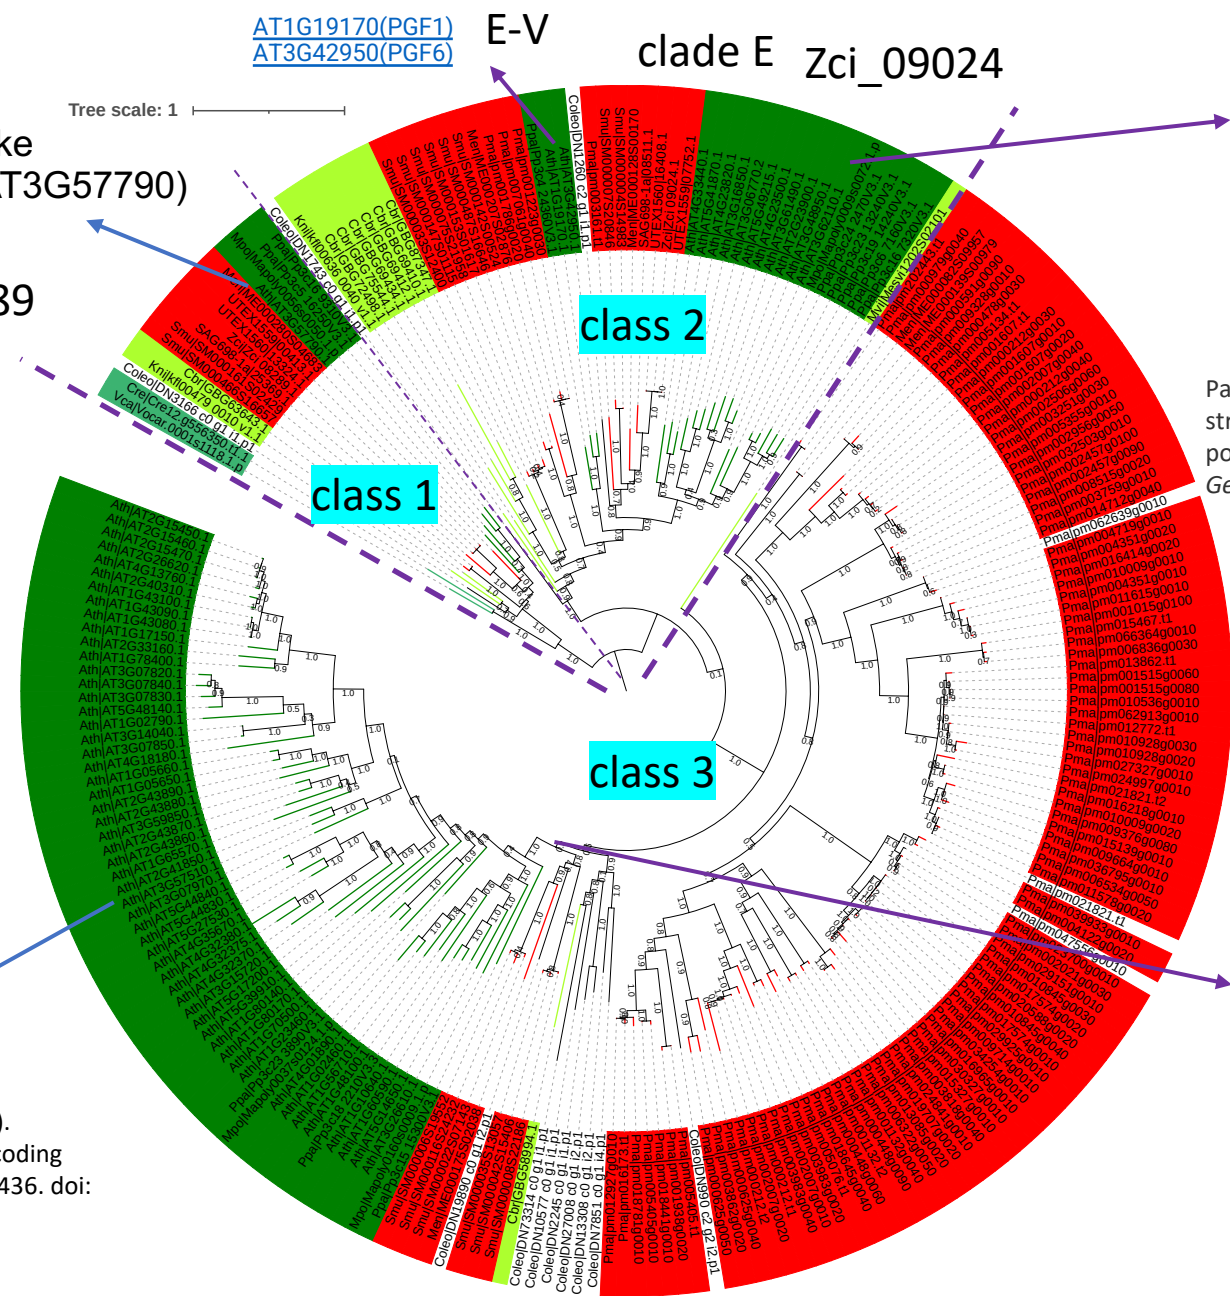

# Data S1-82a

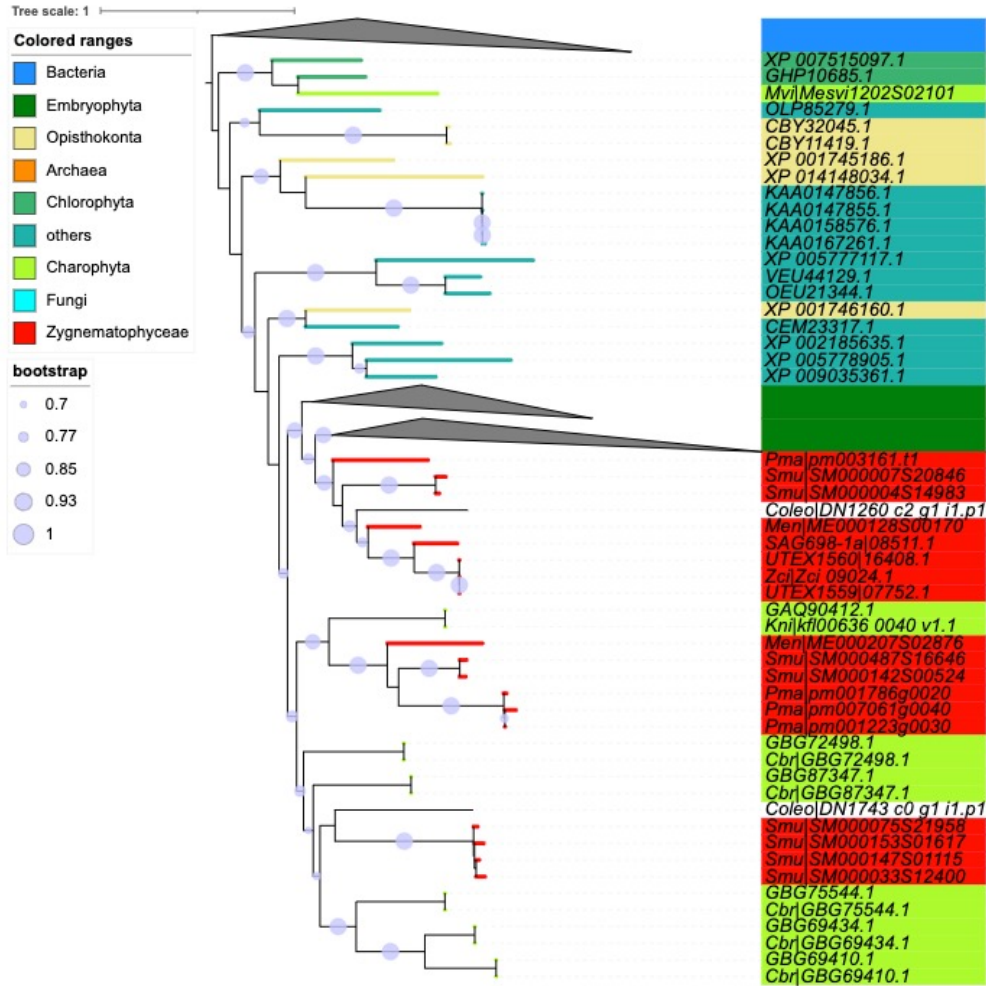

class 2

Zci\_09024

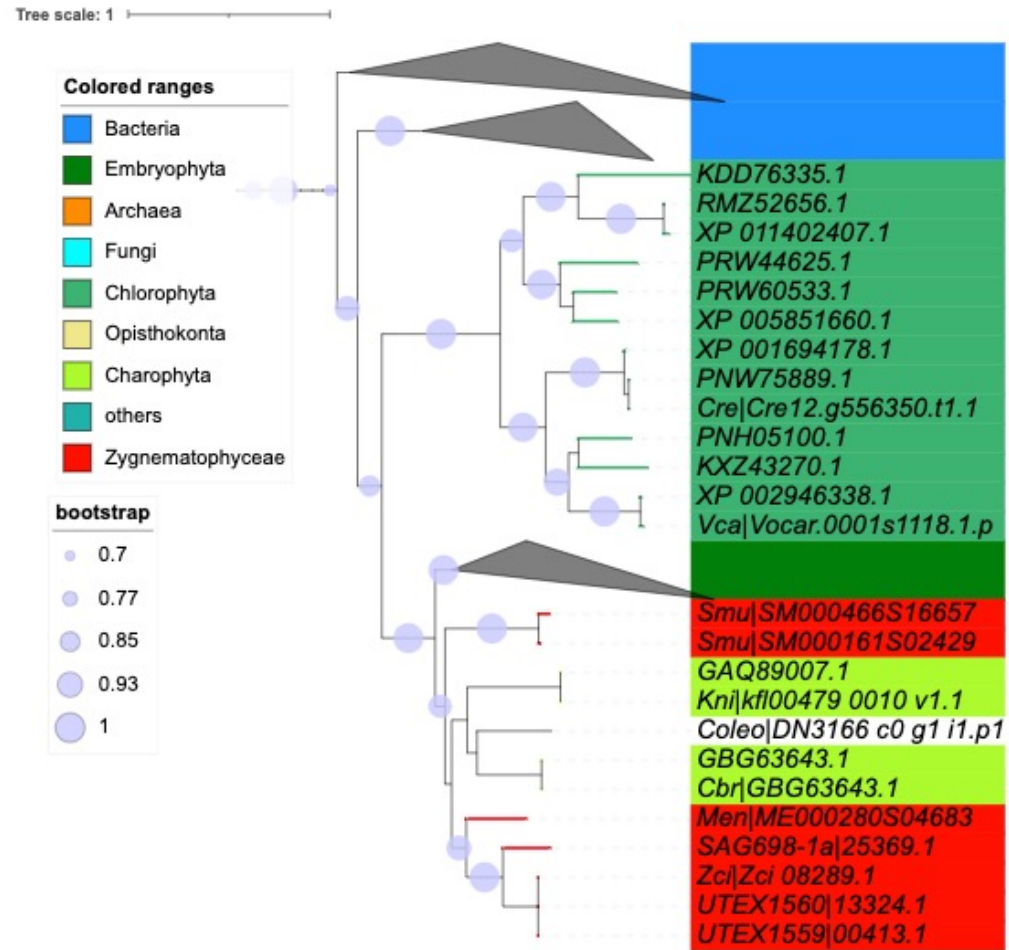

class 1

Zci\_08289

Data S1-82b

<https://itol.embl.de/tree/20812770255475741673199623>

Tree scale: 1

HGT from fungi

Colored ranges

- Embryophyta
- Fungi
- Bacteria
- Opisthokonta
- others
- Archaea
- Charophyta
- Zygnematophyceae

bootstrap

- 0.7
- 0.77
- 0.85
- 0.93
- 1

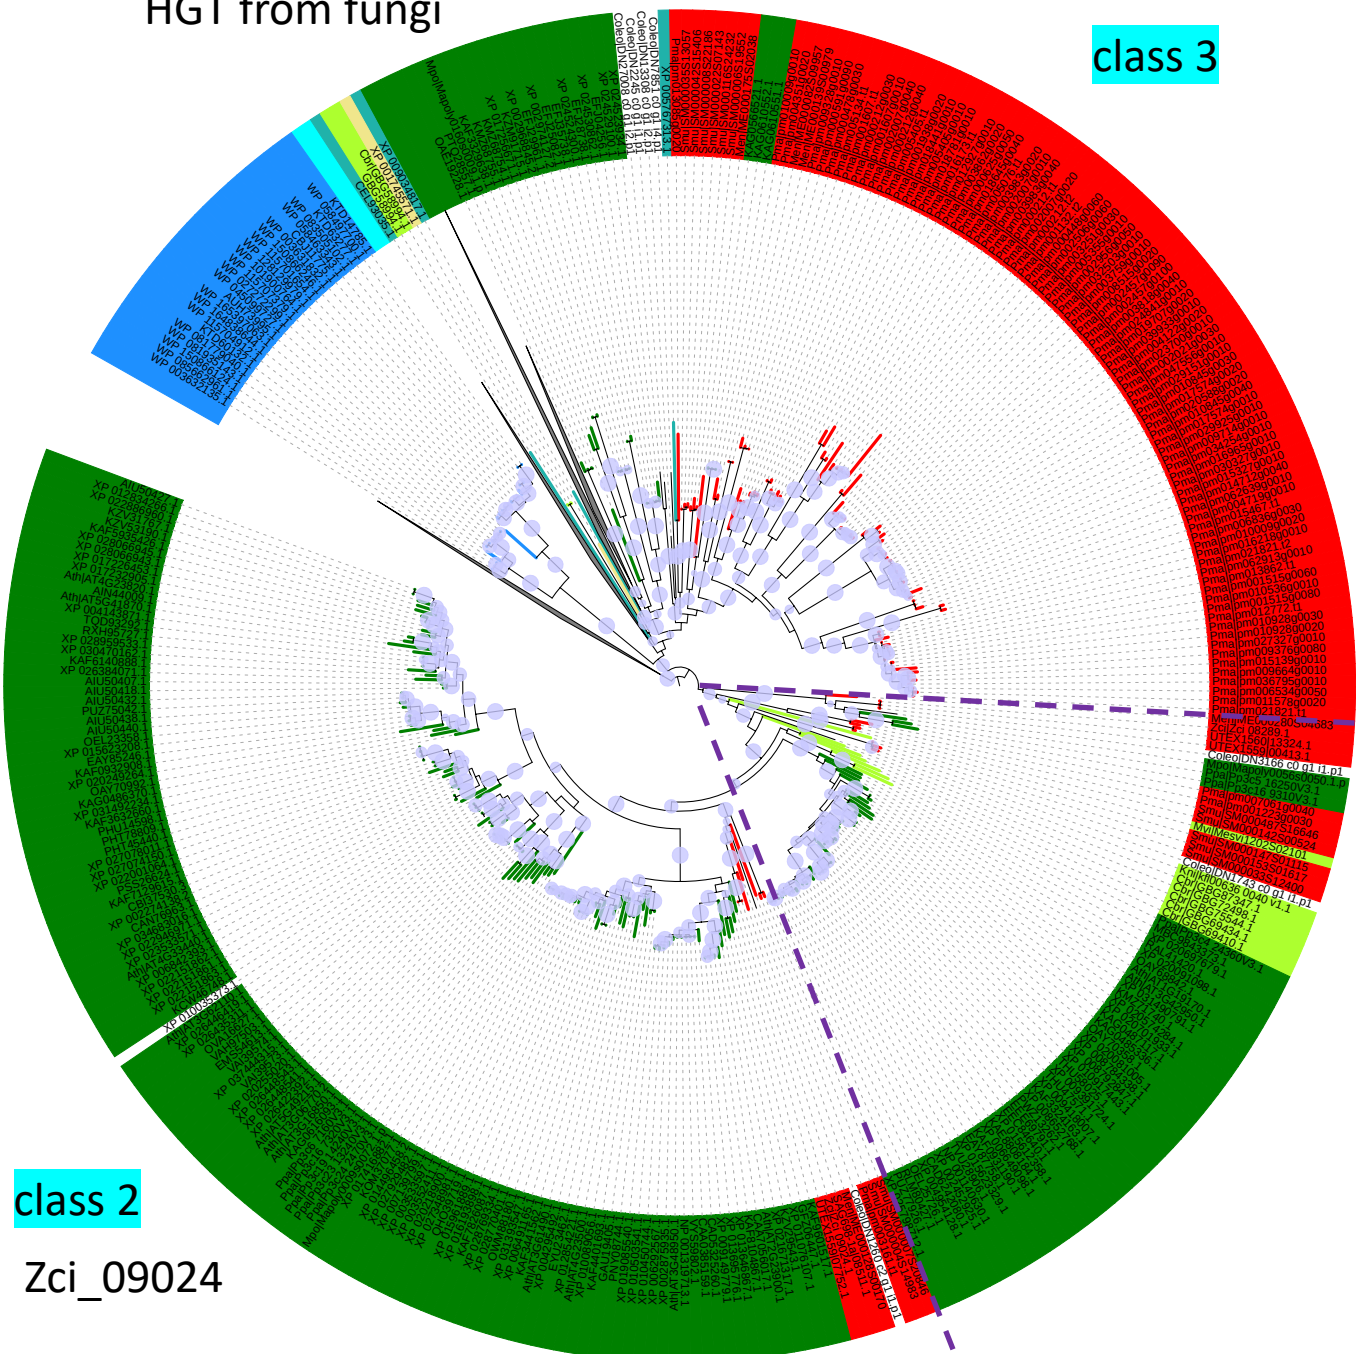

class 3

class 1

Zci\_08289

class 2

Zci\_09024

<http://www.cazy.org/e1.html>

[http://www.cazy.org/PL1\\_12\\_characterized.html](http://www.cazy.org/PL1_12_characterized.html)

|                      |        |             |
|----------------------|--------|-------------|
| At1g04680            | PL1    | AAB80622.1  |
| At1g11920            | PL1    | AAC17625.1  |
| At1g14420            | PL1    | AAF43942.1  |
| At1g30350            | PL1    | AAG51103.1  |
| At1g67750            | PL1    | AAL58893.1  |
| At2g02720            | PL1    | AAC05350.1  |
| At3g01270            | PL1    | AAF03499.1  |
| At3g07010            | PL1    | AAF27005.1  |
| At3g09540            | PL1_12 | AAF23285.1  |
| At3g55140            | PL1_12 | CAB75748.1  |
| At3g24230            | PL1    | BAB01365.1  |
| At3g24670            | PL1    | BAB01216.1  |
| At3g27400            | PL1    | NP_189376.1 |
| At3g53190            | PL1    | BAD95042.1  |
| At3g54920 (PMR6)     | PL1    | AAM97687.1  |
| At4g13210            | PL1    | CAB41931.1  |
| At4g13710            | PL1    | AAL11586.1  |
| At4g22080            | PL1    | CAA18111.1  |
| At4g22090            | PL1    | CAA18112.1  |
| At4g24780 (A10)      | PL1    | AAK25850.1  |
| At5g04310            | PL1    | NP_196051.2 |
| At5g09280 (fragment) | PL1    | CAC05454.1  |
| At5g15110            | PL1    | CAC01830.1  |
| At5g48900            | PL1    | AAK92730.1  |
| At5g55720            | PL1    | BAB09239.1  |
| At5g63180            | PL1    | AAL25610.1  |

Tree scale: 1

Data S1-83b

PL1

PL1\_1

PL1\_12

PL1\_1

PL1\_12

expanded in pma

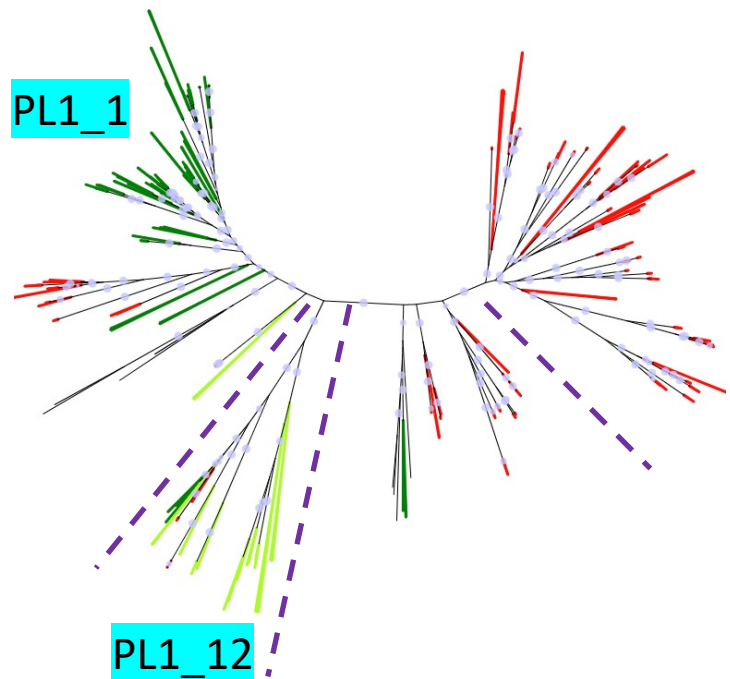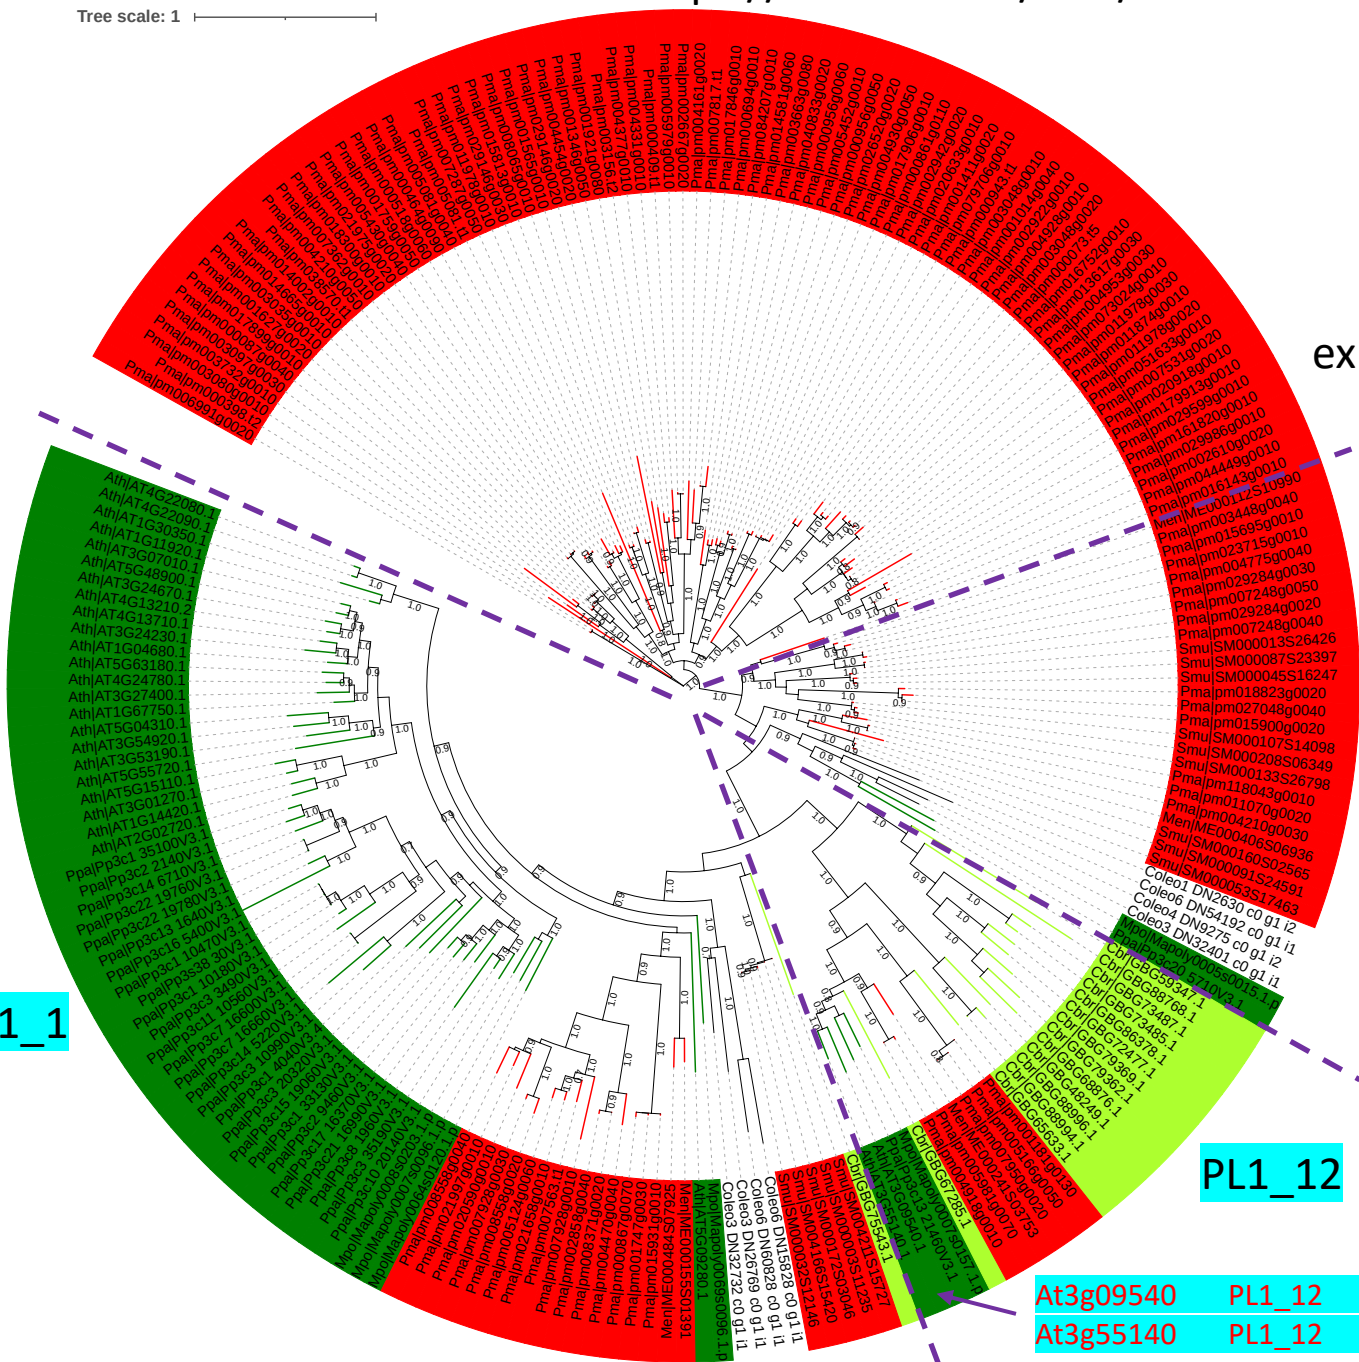

At3g09540 PL1\_12 AAF23285.1  
 At3g55140 PL1\_12 CAB75748.1



- Colored ranges**
- Bacteria
  - Fungi
  - Embryophyta
  - Opisthokonta
  - Charophyta
  - others
  - Archaea
  - Viruses
  - Zygnematochyceae

- bootstrap**
- 0.7
  - 0.77
  - 0.85
  - 0.93
  - 1

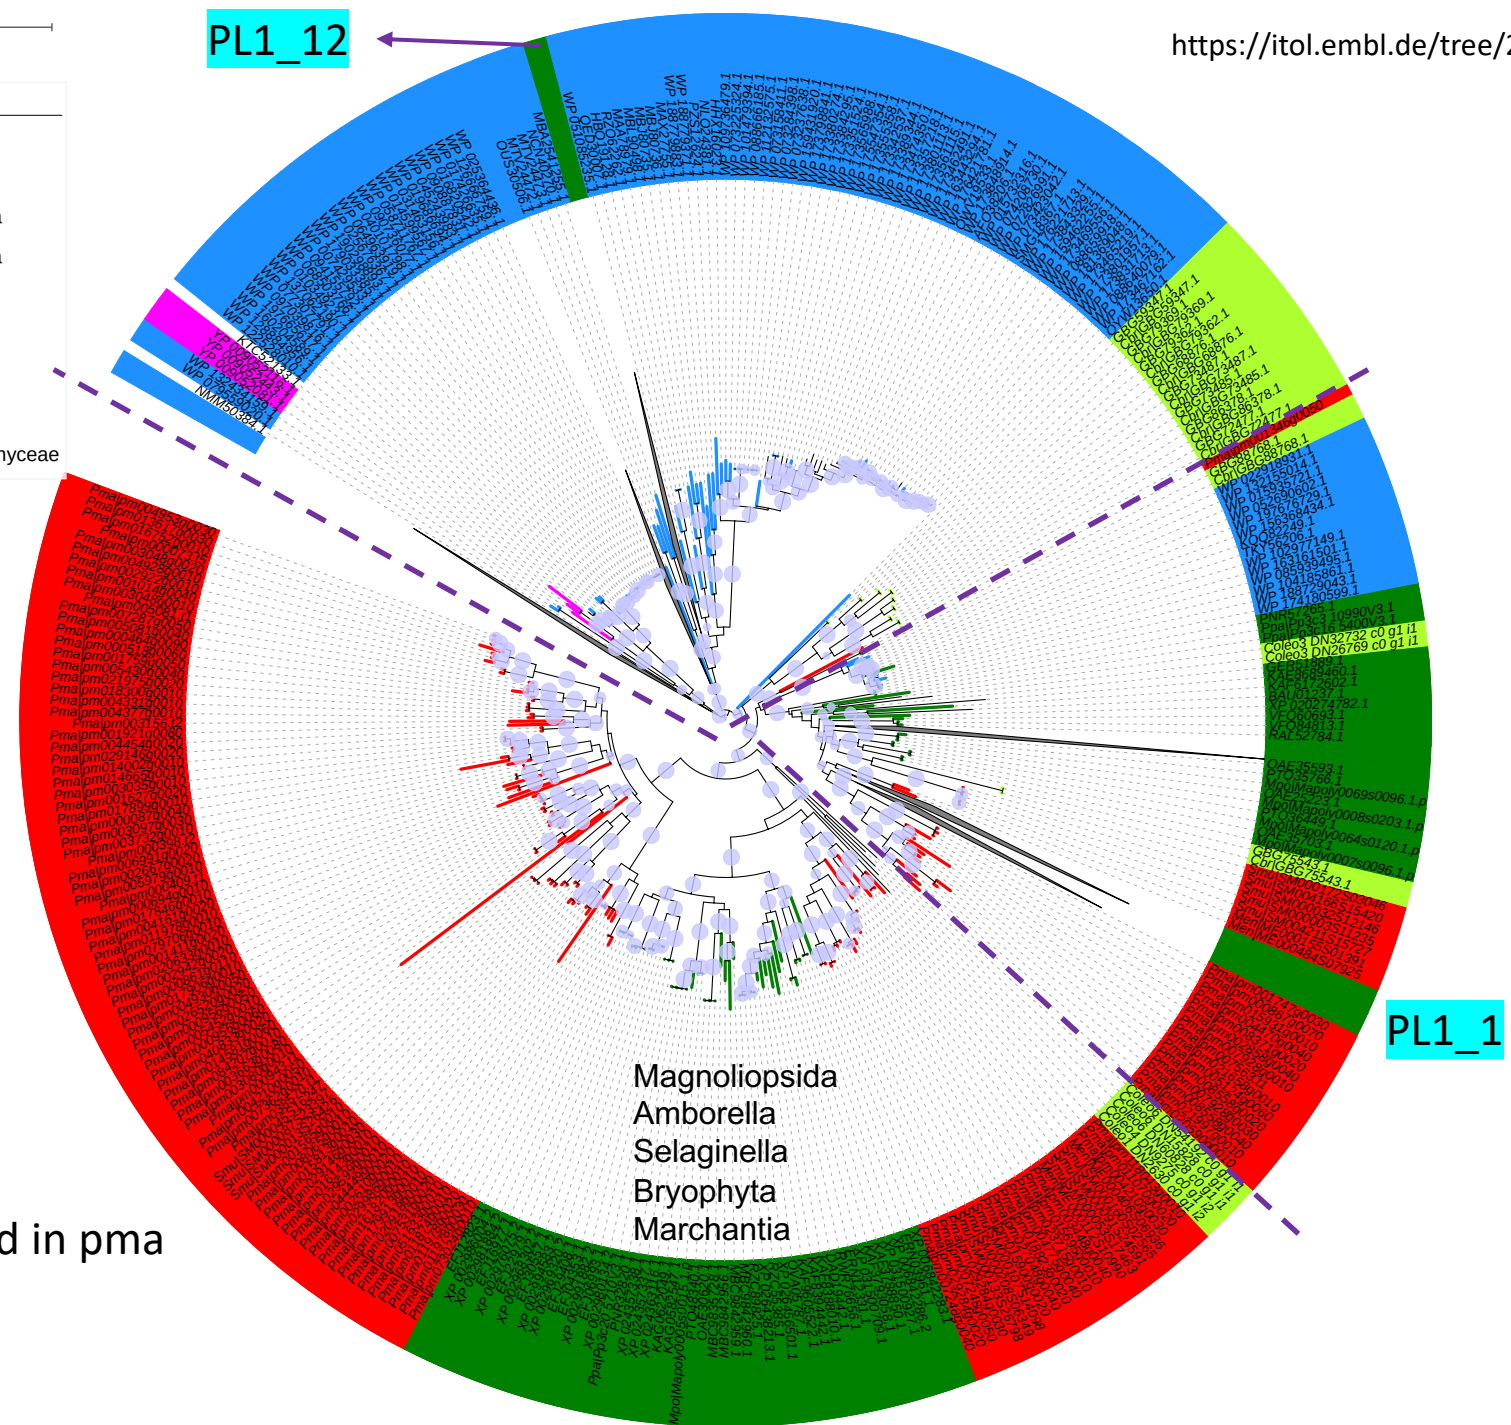

expanded in pma

Data S1-84b

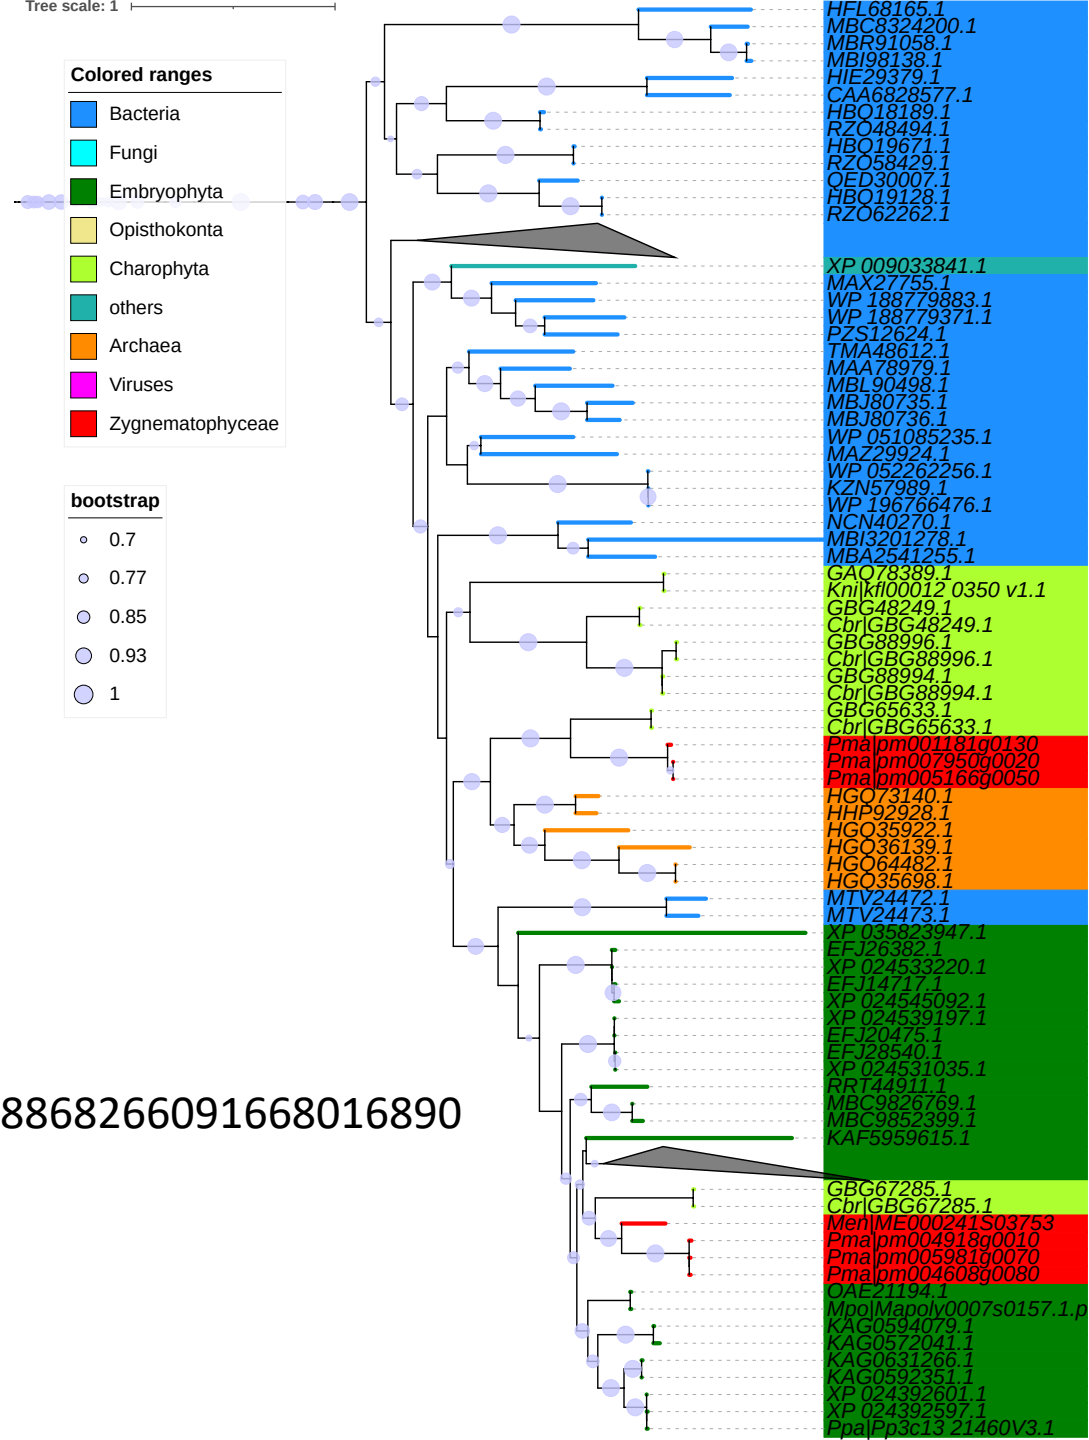

<https://itol.embl.de/tree/2081278868266091668016890>

At3g09540 PL1\_12 AAF23285.1  
At3g55140 PL1\_12 CAB75748.1
